# Supplementary material
Source: publisher figshare collection journal article supplement (https://acs.figshare.com/ndownloader/files/10648813)
Supplement: Supplementary file 1 [file 10648813]

## Sheet: Sheet1
NCBI Accession	Protein Description	HGNC Symbol	In PhosphoSitePlus?	In Wang et al?	Median Signal (Control Arrays, Staining-Normalized)	Median Signal (wild-type OGT-Treated Arrays, Activity-Corrected)	Median Signal (5N5A mutant OGT-Treated Arrays, Activity-Corrected)	Median Signal (wild-type OGT-Treated Arrays, Median-Normalized)	Median Signal (5N5A mutant OGT-Treated Arrays, Median-Normalized)	q-value wild-type OGT vs. control	q-value 5N5A mutant OGT vs. control	q-value wild-type OGT vs. 5N5A mutant	wild-type OGT fold signal (Over Control, Activity-Corrected)	5N5A mutant OGT fold signal (Over Control, Activity-Corrected)	wild-type OGT fold signal (Over Control, Median-Normalized)	5N5A mutant OGT fold signal (Over Control, Median-Normalized)	wild-type OGT fold signal over 5N5A mutant (Activity-Corrected)	wild-type OGT Hit?	5N5A mutant OGT Hit?	wild-type OGT vs. 5N5A mutant Hit?
NM_032786.1	zinc finger CCCH-type containing 10 (ZC3H10)	ZC3H10	FALSE	FALSE	17.829	4059.58	372.209	1207.45	165.095	0	0.0747493	0	227.695	20.8766	67.7239	9.25988	10.9067	TRUE	FALSE	TRUE
NM_145796.2	pogo transposable element with ZNF domain (POGZ), transcript variant 3	POGZ	TRUE	TRUE	19.7628	3100.81	396.198	922.282	175.735	0	0.0976876	0	156.901	20.0477	46.6676	8.89223	7.82641	TRUE	FALSE	TRUE
BC096272.2	HIV-1 Rev binding protein, mRNA (cDNA clone MGC:116938 IMAGE:40006445), complete cds	AGFG1	TRUE	TRUE	20.1905	3132.33	433.045	931.657	192.079	0	0.129864	0.000220409	155.138	21.4479	46.1432	9.51329	7.23327	TRUE	FALSE	TRUE
NM_145716.2	single stranded DNA binding protein 3 (SSBP3), transcript variant 1	SSBP3	FALSE	FALSE	28.7051	4364.86	604.77	1298.25	268.248	0	0.30601	5.14003e-05	152.059	21.0684	45.2272	9.34496	7.21739	TRUE	FALSE	TRUE
BC060818.1	synaptosomal-associated protein, 91kDa homolog (mouse) (SNAP91)	SNAP91	TRUE	TRUE	24.718	3237.84	668.868	963.041	296.679	0	0.418654	0.0134042	130.992	27.06	38.9612	12.0026	4.84078	TRUE	FALSE	TRUE
NM_004712.3	hepatocyte growth factor-regulated tyrosine kinase substrate (HGS)	HGS	FALSE	FALSE	16.8572	2103.68	380.295	625.702	168.681	0	0.220839	0.00169308	124.794	22.5597	37.1177	10.0065	5.5317	TRUE	FALSE	TRUE
BC017020.1	single-stranded DNA binding protein 2 (SSBP2)	SSBP2	FALSE	FALSE	12.8872	1547.33	353.475	460.227	156.785	0	0.272914	0.00171555	120.067	27.4283	35.7119	12.1659	4.37749	TRUE	FALSE	TRUE
BC030592.2	HIV-1 Rev binding protein (HRB)	AGFG1	TRUE	TRUE	13.9907	1511.58	185.605	449.593	82.326	0	0.247275	5.14003e-05	108.042	13.2663	32.1351	5.88434	8.14404	TRUE	FALSE	TRUE
BC040949.1	myocyte enhancer factor 2D (MEF2D)	MEF2D	TRUE	FALSE	22.7516	2417.93	592.9	719.172	262.983	0	0.0870392	0.00032916	106.275	26.0596	31.6097	11.5589	4.07815	TRUE	FALSE	TRUE
NM_148910.1	Toll/interleukin-1 receptor domain-containing adapter protein	TIRAP	FALSE	FALSE	26.3781	2800.83	438.824	833.058	194.642	0	0.0747493	0	106.18	16.6359	31.5814	7.37891	6.38258	TRUE	FALSE	TRUE
NM_001032293.1	zinc finger protein 207 (ZNF207), transcript variant 2	ZNF207	FALSE	FALSE	38.3418	3542.87	550.086	1053.77	243.992	0	0.325934	0.00192684	92.4023	14.3469	27.4835	6.36361	6.44058	TRUE	FALSE	TRUE
BC043247.2	transducin-like enhancer of split 3 (E(sp1) homolog, Drosophila) (TLE3)	TLE3	FALSE	FALSE	8.87695	795.31	267.59	236.551	118.691	0	0.0747493	0.00946399	89.5927	30.1444	26.6478	13.3707	2.97212	TRUE	FALSE	TRUE
NM_001260.1	cyclin C and cyclin-dependent kinase 8 (CDK6): cyclin C and CDK8 sequences are seperated by -- (in the protein list file).	CDK8	FALSE	FALSE	10.5785	765.745	168.868	227.758	74.902	0	0.0747493	0.000252772	72.387	15.9633	21.5303	7.0806	4.53458	TRUE	FALSE	TRUE
NM_005011.2	nuclear respiratory factor 1 (NRF1), transcript variant 1	NRF1	FALSE	FALSE	9.87788	702.125	200.876	208.835	89.0993	0	0.0798631	0.00736347	71.0806	20.3359	21.1417	9.02008	3.49532	TRUE	FALSE	TRUE
NM_130809.2	Protein PPRC1	PRRC1	FALSE	FALSE	12.5441	859.249	220.357	255.569	97.7403	0	0.0798631	0.00161293	68.4982	17.5666	20.3736	7.79173	3.89934	TRUE	FALSE	TRUE
BC017066.1	Protein PPRC1	PRRC1	FALSE	FALSE	13.1123	890.924	229.875	264.99	101.962	0	0.310378	0.00340712	67.9457	17.5312	20.2093	7.77604	3.87569	TRUE	FALSE	TRUE
BC036123.1	stromal membrane-associated protein 1 (SMAP1)	SMAP1	FALSE	FALSE	17.8563	1155.75	212.89	343.759	94.4283	0	0.247275	5.14003e-05	64.7254	11.9224	19.2514	5.28824	5.42888	TRUE	FALSE	TRUE
BC054347.1	early B-cell factor 4 (RP5-860F19.3)	EBF4	FALSE	FALSE	9.30399	561.594	182.539	167.036	80.9659	0	0.208192	0.0101152	60.3606	19.6194	17.9532	8.70228	3.07657	TRUE	FALSE	TRUE
NM_178553.2	Uncharacterized protein C2orf53	PRR30	FALSE	FALSE	51.2602	3050.88	656.552	907.431	291.216	0	0.603516	0.000826508	59.5175	12.8082	17.7025	5.68114	4.64682	TRUE	FALSE	TRUE
NM_004922.2	SEC24 related gene family, member C (S. cerevisiae) (SEC24C), transcript variant 1	SEC24C	FALSE	FALSE	29.1697	1701.83	476.007	506.18	211.134	0	0.270156	0.011257	58.3423	16.3185	17.3529	7.23813	3.57522	TRUE	FALSE	TRUE
NM_001008660.1	phosphatidylinositol binding clathrin assembly protein (PICALM), transcript variant 2	PICALM	TRUE	TRUE	40.0474	2223.77	489.176	661.421	216.976	0	0.0976876	5.14003e-05	55.5283	12.2149	16.5159	5.41797	4.54594	TRUE	FALSE	TRUE
NM_015509.2	NECAP endocytosis associated 1 (NECAP1)	NECAP1	TRUE	FALSE	20.0284	1020.51	260.849	303.533	115.701	0	0.0747493	0.000100095	50.9531	13.0239	15.1551	5.77682	3.91226	TRUE	FALSE	TRUE
BC024254.1	abl-interactor 1 (ABI1)	ABI1	FALSE	FALSE	22.0369	1077.56	226.15	320.501	100.31	0	0.453577	0.00230645	48.8977	10.2623	14.5438	4.55189	4.76478	TRUE	FALSE	TRUE
BC040020.2	zinc finger protein 280B (SUHW2)	ZNF280B	FALSE	FALSE	16.9546	823.262	250.335	244.865	111.037	0	0.0747493	0.000826508	48.5568	14.765	14.4424	6.54908	3.28864	TRUE	FALSE	TRUE
BC064391.1	Coiled-coil domain-containing protein 6	CCDC6	FALSE	TRUE	22.0129	1065.26	271.502	316.844	120.426	0	0.328179	0.0139882	48.3928	12.3338	14.3936	5.47069	3.9236	TRUE	FALSE	TRUE
NM_005254.3	GA binding protein transcription factor, beta subunit 2 (GABPB2), transcript variant beta-1	GABPB2	FALSE	FALSE	8.57987	411.018	142.312	122.25	63.123	0	0.118011	0.0109704	47.9049	16.5867	14.2485	7.3571	2.88815	TRUE	FALSE	TRUE
NM_147196.1	Transmembrane inner ear expressed protein	TMIE	FALSE	FALSE	21.8606	973.148	264.144	289.446	117.162	0	0.254867	0.000145229	44.5162	12.0831	13.2406	5.35952	3.68415	TRUE	FALSE	TRUE
NM_145253.1	LOC124402 (LOC124402), mRNA	UBALD1	FALSE	FALSE	8.19081	362.945	223.146	107.952	98.9774	0	0.24371	0.155988	44.3113	27.2435	13.1796	12.084	1.62649	TRUE	FALSE	FALSE
BC002448.2	actin binding LIM protein 1 (ABLIM1)	ABLIM1	TRUE	TRUE	13.5392	576.084	298.483	171.346	132.393	0	0.0964936	0.0855584	42.5493	22.0458	12.6556	9.77849	1.93004	TRUE	FALSE	FALSE
NM_006047.4	RNA binding motif protein 12 (RBM12), transcript variant 1, mRNA	RBM12	FALSE	FALSE	44.4412	1796.05	335.974	534.203	149.022	0	0.270959	5.14003e-05	40.414	7.55996	12.0204	3.35325	5.34579	TRUE	FALSE	TRUE
BC051687.1	Kruppel-like factor 3 (basic) (KLF3)	KLF3	FALSE	FALSE	5.93305	235.64	97.0379	70.0871	43.0415	0	0.247275	0.0379758	39.7166	16.3555	11.813	7.25454	2.42833	TRUE	FALSE	TRUE
NM_024482.1	glucocorticoid modulatory element binding protein 1 (GMEB1), transcript variant 2	GMEB1	FALSE	TRUE	30.921	1227.55	241.928	365.112	107.308	0	0.325934	5.14003e-05	39.6994	7.82407	11.8079	3.47039	5.07401	TRUE	FALSE	TRUE
NM_203305.1	family with sequence similarity 102, member A (FAM102A), transcript variant 2	FAM102A	FALSE	FALSE	14.6626	578.091	128.425	171.943	56.9635	0	0.107695	5.14003e-05	39.4263	8.75872	11.7267	3.88496	4.50138	TRUE	FALSE	TRUE
NM_001130.5	Amino-terminal enhancer of split	AES	FALSE	FALSE	20.4115	796.389	177.976	236.872	78.942	0	0.654944	0.00142729	39.0167	8.71943	11.6049	3.86753	4.47469	TRUE	FALSE	TRUE
BC002914.1	WAS/WASL-interacting protein family member 1	WIPF1	FALSE	FALSE	24.0973	927.319	262.718	275.815	116.529	0	0.325934	0.00171555	38.4822	10.9024	11.4459	4.83578	3.52972	TRUE	FALSE	TRUE
BC057838.1	sterile alpha motif domain containing 4A (SAMD4A)	SAMD4A	FALSE	FALSE	13.4227	511.404	215.269	152.108	95.4833	0	0.0862766	0.0162027	38.1	16.0377	11.3322	7.11358	2.37565	TRUE	FALSE	TRUE
NM_053046.2	egl nine homolog 2 (C. elegans) (EGLN2), transcript variant 1	EGLN2	FALSE	FALSE	11.5723	428.544	121.513	127.463	53.8974	0	0.485633	0.00264719	37.032	10.5003	11.0145	4.65747	3.52674	TRUE	FALSE	TRUE
NM_170676.2	Meis homeobox 2 (MEIS2), transcript variant d	MEIS2	FALSE	FALSE	16.5949	613.752	199.302	182.55	88.4013	0	0.250826	0.0204376	36.9843	12.0098	11.0003	5.32701	3.0795	TRUE	FALSE	TRUE
NM_001668.2	Aryl hydrocarbon receptor nuclear translocator	ARNT	FALSE	FALSE	39.0389	1442.17	389.098	428.949	172.586	0	0.353474	0.00230645	36.9418	9.96691	10.9877	4.42086	3.70645	TRUE	FALSE	TRUE
NM_006917.3	Retinoic acid receptor RXR-gamma	RXRG	FALSE	FALSE	18.4381	672.601	173.991	200.053	77.1745	0	0.118011	0.000220409	36.4788	9.4365	10.85	4.18559	3.86572	TRUE	FALSE	TRUE
NM_182772.1	CAMP responsive element modulator (CREM), transcript variant 16, mRNA	CREM	FALSE	FALSE	12.067	427.899	157.15	127.271	69.7044	0	0.505136	0.00388805	35.4602	13.0231	10.547	5.77643	2.72288	TRUE	FALSE	TRUE
NM_175634.1	Protein CBFA2T1	RUNX1T1	FALSE	FALSE	9.52003	337.009	120.464	100.238	53.4322	0	0.0747493	0.000190863	35.4	12.6537	10.5291	5.61261	2.79759	TRUE	FALSE	TRUE
NM_006340.1	Brain-specific angiogenesis inhibitor 1-associated protein 2	BAIAP2	TRUE	FALSE	30.4802	1068.21	129.343	317.721	57.3705	0	0.999999	0	35.0461	4.24351	10.4239	1.88222	8.25875	TRUE	FALSE	TRUE
NM_031845.1	microtubule-associated protein 2 (MAP2), transcript variant 2	MAP2	TRUE	TRUE	18.1352	634.797	99.2004	188.809	44.0007	0	0.505136	0.00156762	35.0036	5.47005	10.4112	2.42626	6.39914	TRUE	FALSE	TRUE
BC041831.1	transducin-like enhancer of split 3 (E(sp1) homolog, Drosophila) (TLE3)	TLE3	FALSE	FALSE	23.1669	801.003	332.937	238.244	147.675	0	0.0976876	0.0246539	34.5752	14.3712	10.2838	6.3744	2.40587	TRUE	FALSE	TRUE
BC096222.1	Synovial sarcoma translocation, chromosome 18, mRNA (cDNA clone MGC:116875 IMAGE:40004909), complete cds	SS18	FALSE	FALSE	11.6857	401.832	90.6916	119.518	40.2266	0	0.527964	5.14003e-05	34.3868	7.76093	10.2277	3.44239	4.43075	TRUE	FALSE	TRUE
NM_018070.2	single stranded DNA binding protein 3 (SSBP3), transcript variant 2	SSBP3	FALSE	FALSE	65.8511	2261.84	641.711	672.745	284.633	0.000235325	0.574245	0.0722338	34.3478	9.74488	10.2161	4.32238	3.5247	TRUE	FALSE	FALSE
NM_005171.2	activating transcription factor 1 (ATF1)	ATF1	TRUE	FALSE	9.6646	324.428	65.1735	96.4954	28.908	0	0.365921	0	33.5687	6.74353	9.98442	2.99112	4.97791	TRUE	FALSE	TRUE
NM_004349.2	runt-related transcription factor 1; translocated to, 1 (cyclin D-related) (RUNX1T1), transcript variant 1	RUNX1T1	FALSE	FALSE	16.2214	536.525	120.283	159.58	53.3521	0	0.208192	5.14003e-05	33.0752	7.41513	9.83765	3.28901	4.46051	TRUE	FALSE	TRUE
NM_005898.4	cell cycle associated protein 1 (CAPRIN1), transcript variant 1	CAPRIN1	FALSE	FALSE	42.1161	1368.39	308.182	407.003	136.695	0.000365568	0.999999	0.00592522	32.4908	7.31744	9.66383	3.24568	4.44019	TRUE	FALSE	TRUE
BC070044.1	Golgi associated, gamma adaptin ear containing, ARF binding protein 3, mRNA (cDNA clone MGC:87095 IMAGE:4814878), complete cds	GGA3	FALSE	TRUE	27.1998	881.452	230.684	262.173	102.321	0	0.247275	5.14003e-05	32.4065	8.48108	9.63877	3.76181	3.82104	TRUE	FALSE	TRUE
BC005404.1	Sec23 homolog B (S. cerevisiae), mRNA (cDNA clone MGC:5020 IMAGE:3460841), complete cds	SEC23B	FALSE	FALSE	4.49772	144.678	42.8313	43.0321	18.998	0.000711865	0.613967	0.0787687	32.167	9.52288	9.56752	4.22391	3.37787	TRUE	FALSE	FALSE
NM_015975.3	TAF9B RNA polymerase II, TATA box binding protein (TBP)-associated factor, 31kDa (TAF9B)	TAF9B	FALSE	FALSE	26.605	846.457	225.969	251.764	100.229	0	0.473218	0.00032916	31.8157	8.49344	9.46302	3.7673	3.74591	TRUE	FALSE	TRUE
NM_138565.1	cortactin (CTTN), transcript variant 2	CTTN	FALSE	TRUE	28.7041	885.367	151.105	263.337	67.0231	0.0395287	0.999999	0.0841507	30.8446	5.26422	9.1742	2.33497	5.85929	TRUE	FALSE	FALSE
NM_016655.3	GA binding protein transcription factor, beta subunit 2 (GABPB2), transcript variant gamma-2	GABPB2	FALSE	FALSE	21.1151	650.784	212.457	193.565	94.236	0	0.0747493	5.14003e-05	30.8208	10.0618	9.16711	4.46297	3.06314	TRUE	FALSE	TRUE
NM_032943.2	synaptotagmin-like 2 (SYTL2), transcript variant a	SYTL2	FALSE	FALSE	20.0277	613.018	228.495	182.332	101.35	0	0.0747493	5.14003e-05	30.6085	11.409	9.10397	5.06049	2.68284	TRUE	FALSE	TRUE
BC092474.1	Proline-rich protein 16	PRR16	FALSE	FALSE	31.3155	950.755	263.221	282.786	116.753	0	0.0976876	0.000252772	30.3605	8.40548	9.03022	3.72828	3.61199	TRUE	FALSE	TRUE
BC066974.1	EP400 N-terminal like (EP400NL)	EP400NL	FALSE	FALSE	27.224	820.857	317.38	244.15	140.775	0	0.0798631	0.00273548	30.1519	11.6581	8.96817	5.171	2.58635	TRUE	FALSE	TRUE
BC020726.1	sciellin (SCEL)	SCEL	FALSE	FALSE	20.1187	593.855	137.103	176.632	60.8124	0	0.473218	0.00164031	29.5176	6.8147	8.77951	3.02269	4.33146	TRUE	FALSE	TRUE
NM_023938.4	Specifically androgen-regulated gene protein	C1orf116	FALSE	FALSE	29.8355	862.425	382.421	256.513	169.624	0	0.247275	0.00565563	28.906	12.8177	8.5976	5.68532	2.25517	TRUE	FALSE	TRUE
NM_206853.1	Protein quaking	QKI	FALSE	TRUE	17.5668	501.032	157.725	149.023	69.9597	0	0.50997	0.006963	28.5216	8.97862	8.48324	3.9825	3.17661	TRUE	FALSE	TRUE
BC054501.1	dynamin 2 (DNM2)	DNM2	FALSE	FALSE	12.6191	357.735	73.6537	106.402	32.6694	0	0.559181	5.14003e-05	28.3487	5.83669	8.43183	2.58888	4.85698	TRUE	FALSE	TRUE
NM_002229.2	Jun B proto-oncogene (JUNB), mRNA	JUNB	FALSE	FALSE	3.81257	107.605	24.0638	32.0051	10.6736	0	0.485633	0	28.2236	6.3117	8.39463	2.79958	4.47163	TRUE	FALSE	TRUE
BC013019.1	coiled-coil domain containing 28A (CCDC28A)	CCDC28A	FALSE	TRUE	8.29715	231.467	60.1491	68.846	26.6794	0	0.554272	0.00489885	27.8972	7.24937	8.29755	3.21549	3.84823	TRUE	FALSE	TRUE
NM_032975.2	Dystrobrevin, alpha (DTNA), transcript variant 2, mRNA	DTNA	FALSE	FALSE	6.82398	189.336	73.1074	56.3149	32.4271	0	0.123336	0.0127326	27.7458	10.7133	8.2525	4.75193	2.58984	TRUE	FALSE	TRUE
NM_201998.1	Splicing factor 1	SF1	FALSE	TRUE	25.498	705.793	244.209	209.926	108.32	0	0.30601	0.00303802	27.6803	9.57758	8.23303	4.24817	2.89012	TRUE	FALSE	TRUE
BC018928.1	SEC24 related gene family, member C (S. cerevisiae) (SEC24C)	SEC24C	FALSE	FALSE	81.2083	2184.96	743.015	649.879	329.567	0.000150584	0.527964	0.0145558	26.9056	9.1495	8.00261	4.05829	2.94067	TRUE	FALSE	TRUE
NM_013444.2	ubiquilin 2 (UBQLN2)	UBQLN2	FALSE	FALSE	6.91664	184.751	11.7692	54.951	5.22026	0	0.999999	0	26.7111	1.70157	7.94475	0.754739	15.6979	TRUE	FALSE	TRUE
BC060824.1	AT rich interactive domain 3B (BRIGHT-like) (ARID3B)	ARID3B	FALSE	FALSE	11.0901	294.157	97.569	87.4919	43.2771	6.37339e-05	0.581095	0.00471345	26.5242	8.79782	7.88916	3.90231	3.01486	TRUE	FALSE	TRUE
NM_005253.1	FOS-like antigen 2 (FOSL2)	FOSL2	FALSE	FALSE	33.3588	870.584	297.427	258.94	131.925	0	0.419318	0.0114011	26.0976	8.916	7.76228	3.95472	2.92705	TRUE	FALSE	TRUE
NM_017451.1	BAI1-associated protein 2 (BAIAP2), transcript variant 2	BAIAP2	TRUE	FALSE	26.3106	685.605	286.255	203.921	126.97	0	0.208192	0.0194818	26.0581	10.8798	7.75053	4.8258	2.39508	TRUE	FALSE	TRUE
BC008741.1	PDZ and LIM domain 5 (PDLIM5)	PDLIM5	TRUE	TRUE	17.7952	456.091	94.1769	135.656	41.7725	0	0.65488	0	25.63	5.29226	7.62319	2.3474	4.84292	TRUE	FALSE	TRUE
NM_000074	Soluble CD40L (TRAP) Recombinant Human Protein	CD40LG	FALSE	FALSE	4.98636	126.911	18.4035	37.7475	8.16294	0	0.999999	0	25.4517	3.69076	7.57016	1.63705	6.89604	TRUE	FALSE	TRUE
BC012120.1	nuclear factor I/C (CCAAT-binding transcription factor) (NFIC)	NFIC	FALSE	FALSE	5.14902	130.394	37.8019	38.7835	16.7672	0	0.247275	5.14003e-05	25.3241	7.34157	7.53221	3.25638	3.44941	TRUE	FALSE	TRUE
NM_133265.2	angiomotin (AMOT)	AMOT	TRUE	TRUE	36.1689	904.784	162.168	269.112	71.9303	6.37339e-05	0.875459	0.000815062	25.0155	4.48363	7.44043	1.98873	5.57929	TRUE	FALSE	TRUE
BC043437.2	DCP1 decapping enzyme homolog B (S. cerevisiae), mRNA (cDNA clone MGC:44405 IMAGE:5296928), complete cds	DCP1B	FALSE	TRUE	25.0674	620.2	268.948	184.468	119.293	0	0.0747493	0.00624932	24.7413	10.729	7.35886	4.75889	2.30602	TRUE	FALSE	TRUE
BC009348.2	cirrhosis, autosomal recessive 1A (cirhin) (CIRH1A)	UTP4	FALSE	FALSE	21.2351	523.522	285.418	155.713	126.598	0	0.0798631	0.0089968	24.6536	13.4408	7.33278	5.96172	1.83423	TRUE	FALSE	FALSE
BC000769.1	chromosome 7 open reading frame 25 (C7orf25)	C7orf25	FALSE	FALSE	68.7699	1691.97	113.798	503.248	50.4757	6.37339e-05	0.999999	5.14003e-05	24.6034	1.65477	7.31785	0.733979	14.8682	TRUE	FALSE	TRUE
BC006318.1	erythrocyte membrane protein band 4.9 (dematin) (EPB49)	DMTN	TRUE	TRUE	18.3144	450.099	213.614	133.874	94.7494	0	0.247275	0.019844	24.5762	11.6637	7.30978	5.17349	2.10707	TRUE	FALSE	TRUE
NM_198501.1	Smoothelin-like protein 2	SMTNL2	FALSE	FALSE	42.1714	1034.56	418.221	307.712	185.503	0	0.350231	0.0118815	24.5323	9.91717	7.29671	4.3988	2.47372	TRUE	FALSE	TRUE
BC007346.2	Uncharacterized protein C16orf14	MCRIP2	FALSE	FALSE	11.234	274.23	182.145	81.5651	80.7912	0.000150584	0.247275	0.23877	24.4108	16.2138	7.26056	7.19167	1.50556	TRUE	FALSE	FALSE
BC023546.2	LIM and calponin homology domains 1 (LIMCH1)	LIMCH1	TRUE	TRUE	16.7899	409.086	202.414	121.676	89.7813	0	0.0747493	0.0189193	24.365	12.0557	7.24694	5.34733	2.02104	TRUE	FALSE	TRUE
NM_001039468.1	MAP/microtubule affinity-regulating kinase 2 (MARK2), transcript variant 3	MARK2	TRUE	FALSE	11.7092	282.35	91.9759	83.9801	40.7963	0	0.185626	5.14003e-05	24.1135	7.85502	7.17216	3.48412	3.06983	TRUE	FALSE	TRUE
NM_001033551.1	TOM1-like protein 2	TOM1L2	TRUE	FALSE	10.1595	244.678	129.596	72.7752	57.4826	6.37339e-05	0.310378	0.0801705	24.0836	12.756	7.16324	5.65799	1.88801	TRUE	FALSE	FALSE
NM_005803.2	flotillin 1 (FLOT1)	FLOT1	FALSE	TRUE	2.56851	61.7065	14.9406	18.3535	6.62695	0	0.597651	5.14003e-05	24.0242	5.81682	7.14559	2.58007	4.13013	TRUE	FALSE	TRUE
NM_015687.2	filamin A interacting protein 1 (FILIP1)	FILIP1	FALSE	TRUE	21.1502	505.678	145.039	150.405	64.3325	0	0.270959	0	23.9089	6.85757	7.1113	3.0417	3.4865	TRUE	FALSE	TRUE
BC060828.1	AT rich interactive domain 3A (BRIGHT-like) (ARID3A)	ARID3A	FALSE	FALSE	25.1291	597.808	201.051	177.808	89.1767	0	0.447509	0.007255	23.7894	8.0007	7.07576	3.54874	2.97342	TRUE	FALSE	TRUE
BC038113.1	C-Maf-inducing protein	CMIP	FALSE	FALSE	9.80296	231.505	181.75	68.8571	80.6157	0	0.0976876	0.332704	23.6158	18.5403	7.02411	8.22361	1.27376	TRUE	FALSE	FALSE
BC002650.1	KIAA1622 (KIAA1622)	PPP4R4	FALSE	FALSE	5.54458	130.415	24.1752	38.7897	10.723	0	0.824618	0.00059609	23.5212	4.36014	6.99596	1.93396	5.39458	TRUE	FALSE	TRUE
NM_014240.1	LIM domains containing 1 (LIMD1)	LIMD1	FALSE	FALSE	24.8277	583.828	215.435	173.649	95.557	0	0.217669	0.0090744	23.5151	8.67719	6.99417	3.8488	2.71	TRUE	FALSE	TRUE
NM_007005.3	Transducin-like enhancer protein 4	TLE4	TRUE	TRUE	16.0905	370.366	132.305	110.159	58.6845	0	0.0750019	5.14003e-05	23.0177	8.22258	6.84621	3.64716	2.79932	TRUE	FALSE	TRUE
BC053351.1	distal-less homeobox 1 (DLX1)	DLX1	FALSE	FALSE	14.8386	340.144	147.653	101.17	65.4921	0	0.247275	0.0173676	22.9229	9.9506	6.81802	4.41363	2.30367	TRUE	FALSE	TRUE
NM_013975.1	ligase III, DNA, ATP-dependent (LIG3), nuclear gene encoding mitochondrial protein, transcript variant alpha	LIG3	FALSE	FALSE	21.5696	472.593	97.3444	140.565	43.1775	0	0.80026	5.14003e-05	21.9102	4.51304	6.5168	2.00178	4.85485	TRUE	FALSE	TRUE
NM_023943.1	Transmembrane protein 108 (TMEM108), mRNA	TMEM108	FALSE	FALSE	7.80281	170.734	39.1352	50.7819	17.3585	0	0.818854	5.14003e-05	21.8811	5.01552	6.50815	2.22465	4.36267	TRUE	FALSE	TRUE
BC064367.1	ankyrin repeat and sterile alpha motif domain containing 6 (ANKS6)	ANKS6	FALSE	FALSE	15.0487	328.057	140.652	97.5748	62.3866	6.37339e-05	0.470835	0.0109698	21.7997	9.34645	6.48394	4.14565	2.3324	TRUE	FALSE	TRUE
BC015803.1	interferon regulatory factor 2 (IRF2)	IRF2	FALSE	FALSE	8.25698	179.354	62.6425	53.3458	27.7853	0	0.408858	0.0109422	21.7215	7.58661	6.4607	3.36507	2.86314	TRUE	FALSE	TRUE
NM_001005360.1	Dynamin-2	DNM2	FALSE	FALSE	13.9199	301.243	75.9981	89.5997	33.7092	0	0.247969	0	21.6412	5.45968	6.43681	2.42166	3.96383	TRUE	FALSE	TRUE
NM_004493.1	hydroxysteroid (17-beta) dehydrogenase 10 (HSD17B10), nuclear gene encoding mitochondrial protein, transcript variant 1	HSD17B10	FALSE	FALSE	10.0839	215.661	103.551	64.1446	45.9303	0	0.127602	0.00456598	21.3867	10.269	6.36112	4.55484	2.08266	TRUE	FALSE	TRUE
BC033736.1	dermatopontin (DPT)	DPT	FALSE	FALSE	18.5607	396.412	89.3119	117.906	39.6146	0.000150584	0.609327	0.0119517	21.3576	4.81187	6.35245	2.13432	4.43852	TRUE	FALSE	TRUE
NM_033259.1	calcium/calmodulin-dependent protein kinase II inhibitor 2 (CAMK2N2)	CAMK2N2	FALSE	FALSE	35.6136	760.58	80.3879	226.221	35.6563	0.000189025	0.999999	5.14003e-05	21.3565	2.25722	6.35211	1.0012	9.46138	TRUE	FALSE	TRUE
NM_016836.1	RNA binding motif, single stranded interacting protein 1 (RBMS1), transcript variant 1	RBMS1	FALSE	FALSE	8.26327	176.088	49.2293	52.3744	21.8358	0	0.485633	0.00187658	21.3097	5.9576	6.33821	2.64252	3.5769	TRUE	FALSE	TRUE
BC050616.1	tumor suppressing subtransferable candidate 4 (TSSC4)	TSSC4	FALSE	FALSE	11.0981	236.177	100.392	70.2467	44.5294	0	0.208192	0.00432516	21.2808	9.04589	6.3296	4.01234	2.35254	TRUE	FALSE	TRUE
BC001304.1	piccolo (presynaptic cytomatrix protein) (PCLO)	PCLO	TRUE	TRUE	13.5368	276.72	50.6863	82.3057	22.4821	0	0.921264	5.14003e-05	20.4421	3.74434	6.08015	1.66081	5.45947	TRUE	FALSE	TRUE
NM_020992.2	PDZ and LIM domain 1 (elfin) (PDLIM1)	PDLIM1	TRUE	FALSE	25.683	518.532	134.265	154.228	59.5536	0.000601515	0.955884	0.00865712	20.1897	5.22777	6.00507	2.3188	3.86201	TRUE	FALSE	TRUE
NM_145293.1	Putative elongation factor 1-delta-like protein	EEF1DP3	FALSE	FALSE	11.9572	241.04	62.5852	71.6931	27.7599	0	0.697781	0	20.1586	5.23412	5.99582	2.32161	3.85138	TRUE	FALSE	TRUE
BC034488.2	ATP-binding cassette, sub-family F (GCN20), member 1 (ABCF1)	ABCF1	FALSE	FALSE	1.16799	23.1461	2.16939	6.88442	0.962239	0.000213382	0.999999	0	19.8171	1.85737	5.89425	0.823842	10.6694	TRUE	FALSE	TRUE
NM_005641.2	TAF6 RNA polymerase II, TATA box binding protein (TBP)-associated factor, 80kDa (TAF6), transcript variant 1	TAF6	TRUE	TRUE	35.6509	698.787	195.923	207.842	86.9022	0.000397623	0.999999	0.00547474	19.6008	5.49559	5.82993	2.43759	3.56665	TRUE	FALSE	TRUE
BC002680.1	thyroid hormone receptor interactor 6 (TRIP6)	TRIP6	FALSE	FALSE	16.2189	311.327	112.368	92.5987	49.8412	0	0.362972	0.00171555	19.1953	6.92822	5.70932	3.07304	2.7706	TRUE	FALSE	TRUE
NM_181712.2	KN motif and ankyrin repeat domain-containing protein 4	KANK4	FALSE	FALSE	12.198	232.96	136.016	69.29	60.3303	0.000150584	0.278479	0.152164	19.0983	11.1507	5.68045	4.94593	1.71274	TRUE	FALSE	FALSE
NM_199124.1	chromosome 11 open reading frame 63 (C11orf63), transcript variant 2	C11orf63	FALSE	FALSE	11.6548	221.285	138.187	65.8173	61.2936	0	0.107695	0.040327	18.9866	11.8567	5.64724	5.25909	1.60134	TRUE	FALSE	FALSE
NM_005717.2	Actin-related protein 2/3 complex subunit 5	ARPC5	FALSE	FALSE	25.085	472.697	40.3692	140.596	17.9059	0.000150584	0.999999	0	18.8438	1.6093	5.60476	0.713809	11.7093	TRUE	FALSE	TRUE
NM_014515.1	CCR4-NOT transcription complex, subunit 2 (CNOT2), mRNA	CNOT2	TRUE	FALSE	2.72736	51.1988	15.8118	15.2282	7.01339	0	0.447509	0.000321757	18.7723	5.79747	5.58348	2.57149	3.23801	TRUE	FALSE	TRUE
NM_018335.2	chromosome 14 open reading frame 131 (C14orf131)	ZNF839	FALSE	FALSE	25.8875	483.317	299.818	143.754	132.985	6.37339e-05	0.233856	0.0987832	18.6699	11.5816	5.55303	5.13704	1.61203	TRUE	FALSE	FALSE
NM_032430.1	BR serine/threonine kinase 1	BRSK1	FALSE	FALSE	9.71888	181.136	12.4814	53.8759	5.53617	0	0.999999	0	18.6376	1.28424	5.54343	0.56963	14.5125	TRUE	FALSE	TRUE
NM_138285.3	Nucleoporin NUP53	NUP35	TRUE	TRUE	72.9906	1337.48	410.278	397.809	181.98	0.000235325	0.613967	0.0266532	18.324	5.62097	5.45015	2.4932	3.25993	TRUE	FALSE	TRUE
NM_174909.1	transmembrane protein 167 (TMEM167)	TMEM167A	FALSE	FALSE	1.18094	21.5934	15.7317	6.42258	6.97784	0.0246815	0.658464	0.464136	18.2848	13.3213	5.43851	5.9087	1.37261	TRUE	FALSE	FALSE
NM_005982.1	Sine oculis homeobox homolog 1 (Drosophila) (SIX1), mRNA	SIX1	FALSE	FALSE	5.10705	92.8373	36.4607	27.6128	16.1723	0	0.262571	0.00230645	18.1783	7.13929	5.40681	3.16666	2.54623	TRUE	FALSE	TRUE
NM_002190	IL17 Recombinant Human Protein	IL17A	FALSE	FALSE	4.91062	89.1957	32.0969	26.5297	14.2367	0	0.609363	0.00276816	18.1638	6.53622	5.40252	2.89916	2.77895	TRUE	FALSE	TRUE
NM_000545.3	Transcription factor 1, hepatic; LF-B1, hepatic nuclear factor (HNF1), albumin proximal factor (TCF1), mRNA	HNF1A	FALSE	FALSE	20.1428	365.172	134.462	108.614	59.641	0	0.165661	0	18.1291	6.67541	5.39219	2.9609	2.7158	TRUE	FALSE	TRUE
NM_032331.1	endothelin converting enzyme 2 (ECE2), transcript variant 3	ECE2	FALSE	FALSE	5.86565	105.356	24.0991	31.3364	10.6893	0.00223559	0.911642	0.038251	17.9616	4.10852	5.34235	1.82235	4.37178	TRUE	FALSE	TRUE
NM_144492.1	claudin 14 (CLDN14), transcript variant 1	CLDN14	FALSE	FALSE	9.60152	172.204	59.41	51.2192	26.3515	0.000585154	0.654944	0.0270128	17.9351	6.18756	5.33448	2.74451	2.89857	TRUE	FALSE	TRUE
NM_004281.2	BCL2-associated athanogene 3 (BAG3)	BAG3	FALSE	TRUE	23.4435	417.062	199.436	124.048	88.4606	0.000150584	0.418654	0.0218313	17.7901	8.50711	5.29137	3.77336	2.09121	TRUE	FALSE	TRUE
NM_021168.2	RAB40C, member RAS oncogene family (RAB40C)	RAB40C	FALSE	FALSE	29.4633	518.746	71.9705	154.292	31.9228	0.000425826	0.999999	0.000481596	17.6065	2.44272	5.23676	1.08348	7.20777	TRUE	FALSE	TRUE
NM_006119.2	Recombinant Human Fibroblast Growth Factor 8b (rhFGF-8b)	FGF8	FALSE	FALSE	4.01892	70.6057	7.69697	21.0004	3.41402	0	0.999999	0	17.5683	1.91518	5.22539	0.849486	9.17318	TRUE	FALSE	TRUE
BC015032.1	Ribosomal protein L3, mRNA (cDNA clone IMAGE:3912046), complete cds	RPL3	FALSE	FALSE	2.89848	50.8346	12.3299	15.1199	5.46898	0	0.50997	0	17.5384	4.25392	5.21648	1.88684	4.12287	TRUE	FALSE	TRUE
NM_024567.2	homeobox containing 1 (HMBOX1)	HMBOX1	FALSE	FALSE	9.82521	172.284	88.5301	51.2429	39.2678	0.000497648	0.606203	0.0501708	17.5349	9.0105	5.21545	3.99664	1.94605	TRUE	FALSE	FALSE
BC002677.1	A.T hook DNA-binding motif-containing protein 1	AHDC1	FALSE	TRUE	27.8069	487.488	207.538	144.995	92.0541	0.00180234	0.875459	0.025498	17.5312	7.46353	5.21435	3.31048	2.34892	TRUE	FALSE	TRUE
NM_144679.1	chromosome 17 open reading frame 56 (C17orf56)	TEPSIN	FALSE	FALSE	26.3353	459.731	196.55	136.739	87.1805	0.0119023	0.925187	0.148866	17.4568	7.46337	5.19223	3.31041	2.339	TRUE	FALSE	FALSE
BC028244.1	E2F transcription factor 8 (E2F8)	E2F8	FALSE	FALSE	15.3214	267.35	103.188	79.5188	45.7694	0	0.272914	0.000145229	17.4495	6.7349	5.19005	2.98729	2.59091	TRUE	FALSE	TRUE
NM_153320.1	solute carrier family 22 (organic anion transporter), member 7 (SLC22A7), transcript variant 2	SLC22A7	FALSE	FALSE	8.24467	143.831	84.8009	42.78	37.6137	0.00180234	0.473218	0.279673	17.4453	10.2855	5.18881	4.56219	1.6961	TRUE	FALSE	FALSE
BC030538.2	hypothetical protein FLJ21986 (FLJ21986)	CPED1	FALSE	FALSE	1.45911	25.3724	16.4635	7.54659	7.30246	0.00384427	0.568744	0.303055	17.3889	11.2832	5.17204	5.00473	1.54113	TRUE	FALSE	FALSE
BC047536.1	sciellin (SCEL)	SCEL	FALSE	FALSE	35.9686	621.151	244.772	184.751	108.57	0	0.275414	0.00442794	17.2693	6.80516	5.13644	3.01845	2.53767	TRUE	FALSE	TRUE
NM_014110.3	protein phosphatase 1, regulatory (inhibitor) subunit 8 (PPP1R8), transcript variant 1	PPP1R8	FALSE	FALSE	17.6645	301.031	135.915	89.5364	60.2858	0.000150584	0.402945	0.0352862	17.0415	7.69425	5.06871	3.41281	2.21484	TRUE	FALSE	TRUE
NM_182644.1	Ephrin receptor A3 (EPHA3), transcript variant 2	EPHA3	FALSE	FALSE	6.72996	114.141	32.0941	33.9493	14.2355	0.000235325	0.709526	0.0098317	16.9602	4.76885	5.04451	2.11524	3.55645	TRUE	FALSE	TRUE
NM_032907.3	Ubiquitin-like protein 7	UBL7	FALSE	FALSE	19.9353	338.09	75.7644	100.559	33.6056	0.000150584	0.788666	0.00293713	16.9594	3.80051	5.04427	1.68573	4.46239	TRUE	FALSE	TRUE
BC007782.2	immunoglobulin lambda constant 1 (Mcg marker) (IGLC1)	IGLC1	FALSE	FALSE	26.4508	448.462	83.1867	133.387	36.8978	6.37339e-05	0.999999	0	16.9546	3.14497	5.04285	1.39496	5.39102	TRUE	FALSE	TRUE
BC065370.1	chromosome 20 open reading frame 112 (C20orf112)	NOL4L	FALSE	FALSE	37.4771	631.005	268.079	187.682	118.908	0.000334054	0.537241	0.0479325	16.8371	7.15315	5.0079	3.1728	2.3538	TRUE	FALSE	TRUE
NM_004714.1	Dual specificity tyrosine-phosphorylation-regulated kinase 1B	DYRK1B	FALSE	FALSE	9.68959	163.106	67.3469	48.5131	29.872	0	0.473218	0.00292357	16.8331	6.95044	5.00673	3.08289	2.42188	TRUE	FALSE	TRUE
BC024725.1	ankyrin repeat domain 50 (ANKRD50)	ANKRD50	FALSE	FALSE	28.9734	485.476	157.696	144.396	69.9467	6.37339e-05	0.473218	0.00633996	16.7559	5.4428	4.98376	2.41417	3.07855	TRUE	FALSE	TRUE
NM_144578.1	chromosome 14 open reading frame 32 (C14orf32)	MAPK1IP1L	FALSE	FALSE	43.4979	717.022	236.209	213.266	104.771	0	0.505069	0.00150426	16.4841	5.43036	4.90291	2.40865	3.03554	TRUE	FALSE	TRUE
BC023549.2	Fas (TNFRSF6) binding factor 1 (FBF1)	FBF1	FALSE	FALSE	18.0796	295.665	92.2832	87.9404	40.9325	0	0.418654	0.000252772	16.3535	5.10428	4.86407	2.26402	3.20389	TRUE	FALSE	TRUE
NM_177974.1	cancer susceptibility candidate 4 (CASC4), transcript variant 2	CASC4	FALSE	FALSE	8.23211	133.164	48.5876	39.6073	21.5512	0	0.574245	5.14003e-05	16.1762	5.90221	4.81132	2.61795	2.7407	TRUE	FALSE	TRUE
NM_182770.1	cAMP responsive element modulator (CREM), transcript variant 14, mRNA.	CREM	FALSE	FALSE	19.0666	308.169	99.1869	91.6595	43.9947	0.000150584	0.654944	0.0039128	16.1628	5.20213	4.80733	2.30742	3.10695	TRUE	FALSE	TRUE
BC044632.1	Transcription factor 19 (SC1), mRNA (cDNA clone MGC:52412 IMAGE:4841638), complete cds	TCF19	FALSE	FALSE	14.5882	234.887	107.493	69.8632	47.6789	0.00047588	0.527964	0.054777	16.1012	7.3685	4.78903	3.26833	2.18514	TRUE	FALSE	FALSE
BC032452.1	immunoglobulin lambda locus (IGL@)	IGL	FALSE	FALSE	1.22101	19.569	45.8198	5.82046	20.3235	0.221875	0.682845	0.498242	16.0269	37.5261	4.76692	16.6448	0.427086	FALSE	FALSE	FALSE
NM_003159.1	Cyclin-dependent kinase-like 5	CDKL5	FALSE	FALSE	1.33531	21.2712	2.21931	6.32676	0.984385	0.00180234	0.999999	0.000220409	15.9298	1.66202	4.73805	0.737196	9.5846	TRUE	FALSE	TRUE
NM_007162.1	transcription factor EB (TFEB)	TFEB	FALSE	FALSE	21.2179	335.766	161.104	99.8678	71.4585	0	0.278479	0.0325725	15.8246	7.59284	4.70676	3.36783	2.08415	TRUE	FALSE	TRUE
NM_024068.1	oligonucleotide/oligosaccharide-binding fold containing 2B (OBFC2B)	NABP2	FALSE	FALSE	8.25921	130.078	55.2771	38.6893	24.5184	0.00235523	0.999999	0.0168727	15.7494	6.69278	4.68439	2.96861	2.35319	TRUE	FALSE	TRUE
NP_004086.1	EIF4EBP1 / 4EBP1 Protein (His Tag)	EIF4EBP1	FALSE	FALSE	1.01137	15.9206	4.52973	4.73531	2.00918	0.00270497	0.999999	0.00901067	15.7417	4.47882	4.68209	1.9866	3.51469	TRUE	FALSE	TRUE
BC036080.1	GA-binding protein subunit beta-1	GABPB1	FALSE	FALSE	16.1971	253.877	127.91	75.5115	56.7351	0.000235325	0.473218	0.0546761	15.6742	7.8971	4.66202	3.50279	1.98481	TRUE	FALSE	FALSE
BC063792.1	Uncharacterized protein KIAA1310	KANSL3	TRUE	TRUE	12.5979	196.987	46.6169	58.5905	20.6771	0	0.999999	0	15.6365	3.70036	4.6508	1.64131	4.22566	TRUE	FALSE	TRUE
NM_006116.2	mitogen-activated protein kinase kinase kinase 7 interacting protein 1 (MAP3K7IP1), transcript variant alpha	TAB1	TRUE	TRUE	29.7982	462.143	171.969	137.456	76.2777	0.000150584	0.601239	0.00363656	15.5091	5.77114	4.61291	2.55981	2.68735	TRUE	FALSE	TRUE
BC030530.1	synovial apoptosis inhibitor 1, synoviolin (SYVN1)	SYVN1	FALSE	FALSE	6.10078	93.7343	15.8875	27.8796	7.04696	0	0.98908	0	15.3643	2.60418	4.56985	1.15509	5.89988	TRUE	FALSE	TRUE
NP_777596.2	PCSK9 / NARC1 Protein (His Tag)	PCSK9	FALSE	FALSE	1.19548	18.3677	10.3913	5.46314	4.60908	0.000235325	0.278479	0.160837	15.3642	8.69212	4.56983	3.85542	1.76761	TRUE	FALSE	FALSE
NM_020762.1	SLIT-ROBO Rho GTPase activating protein 1 (SRGAP1), mRNA	SRGAP1	FALSE	FALSE	27.0309	412.357	252.36	122.648	111.935	0	0.118011	0.0811667	15.255	9.33598	4.53734	4.14101	1.634	TRUE	FALSE	FALSE
NM_006479.2	RAD51 associated protein 1 (RAD51AP1)	RAD51AP1	FALSE	FALSE	19.8523	302.344	94.2182	89.9271	41.7908	0.000794563	0.999999	0.006963	15.2297	4.74596	4.52981	2.10509	3.20898	TRUE	FALSE	TRUE
NM_001206389	FGF8 Recombinant Human Protein	FGF8	FALSE	FALSE	5.19414	79.1021	15.4065	23.5276	6.83359	0	0.999999	0	15.2291	2.96612	4.52964	1.31563	5.13435	TRUE	FALSE	TRUE
NM_023109.1	fibroblast growth factor receptor 1 (fms-related tyrosine kinase 2, Pfeiffer syndrome) (FGFR1), transcript variant 7	FGFR1	FALSE	FALSE	11.789	178.989	73.8424	53.2371	32.7531	0	0.290405	0.0147578	15.1826	6.26365	4.51582	2.77826	2.42393	TRUE	FALSE	TRUE
BC067755.1	potassium channel tetramerisation domain containing 18 (KCTD18)	KCTD18	FALSE	FALSE	24.8503	375.647	119.502	111.73	53.0055	0.000213382	0.527964	0.0234458	15.1164	4.80887	4.49611	2.13299	3.14344	TRUE	FALSE	TRUE
NM_018090.2	NECAP endocytosis associated 2 (NECAP2)	NECAP2	FALSE	FALSE	17.048	257.261	138.431	76.5179	61.4016	0.000189025	0.470835	0.0352376	15.0904	8.12009	4.48839	3.6017	1.85841	TRUE	FALSE	FALSE
BC001351.1	Four and a half LIM domains protein 3	FHL3	FALSE	FALSE	12.4384	187.69	49.9934	55.8253	22.1747	6.37339e-05	0.680163	0.00192684	15.0896	4.01928	4.48814	1.78277	3.75431	TRUE	FALSE	TRUE
NM_002399.2	Meis homeobox 2 (MEIS2), transcript variant f	MEIS2	FALSE	FALSE	6.87894	103.295	54.4749	30.7233	24.1626	0	0.247275	0.025948	15.0161	7.91909	4.46628	3.51254	1.89619	TRUE	FALSE	FALSE
BC016330.1	RAD51 associated protein 1 (RAD51AP1)	RAD51AP1	FALSE	FALSE	17.628	262.902	95.5505	78.1957	42.3818	0.000150584	0.473218	0.00873162	14.9139	5.42037	4.43587	2.40423	2.75145	TRUE	FALSE	TRUE
NM_138640.1	golgi associated, gamma adaptin ear containing, ARF binding protein 2 (GGA2), transcript variant 2	GGA2	FALSE	TRUE	9.33922	138.517	100.363	41.1995	44.5165	0.000213382	0.233856	0.36636	14.8318	10.7464	4.41146	4.76662	1.38016	TRUE	FALSE	FALSE
NM_031492.1	RNA binding motif protein 4B (RBM4B)	RBM4B	FALSE	FALSE	6.69933	99.0377	28.6737	29.4571	12.7183	6.37339e-05	0.485633	0.00343179	14.7832	4.28008	4.39701	1.89844	3.45396	TRUE	FALSE	TRUE
BC035021.1	membrane-associated ring finger (C3HC4) 10 (RNF190)	MARCH10	FALSE	FALSE	20.2491	298.467	152.374	88.7737	67.5859	0.00185823	0.581095	0.143031	14.7398	7.52497	4.38409	3.33773	1.95878	TRUE	FALSE	FALSE
NM_139317.1	Baculoviral IAP repeat-containing protein 7	BIRC7	FALSE	FALSE	7.41785	109.213	29.4693	32.4837	13.0712	0	0.766906	0.00032916	14.7231	3.97275	4.37912	1.76213	3.70601	TRUE	FALSE	TRUE
NM_198044.1	zinc finger, DHHC-type containing 16 (ZDHHC16), transcript variant 3	ZDHHC16	FALSE	FALSE	17.572	257.303	102.449	76.5302	45.4418	0	0.418654	5.14003e-05	14.6428	5.83026	4.35524	2.58604	2.51151	TRUE	FALSE	TRUE
P20023	CD21 / CR2 / C3DR Protein (His Tag)	CR2	FALSE	FALSE	4.23377	61.683	16.0065	18.3465	7.09975	0.00940568	0.999999	0.0342736	14.5693	3.78068	4.33338	1.67693	3.85362	TRUE	FALSE	TRUE
NM_006869.1	centaurin, alpha 1 (CENTA1)	ADAP1	FALSE	FALSE	9.81934	142.968	44.5207	42.5235	19.7473	0.000268035	0.973176	0.00441344	14.5599	4.53398	4.33059	2.01106	3.21128	TRUE	FALSE	TRUE
NM_152322.2	BTB (POZ) domain containing 11 (BTBD11), transcript variant 1	BTBD11	FALSE	FALSE	2.11616	30.7675	7.74702	9.15126	3.43622	0.00256624	0.999999	0.0136938	14.5393	3.66088	4.32446	1.6238	3.97153	TRUE	FALSE	TRUE
NM_017545.2	Hydroxyacid oxidase (glycolate oxidase) 1 (HAO1), mRNA	HAO1	FALSE	FALSE	7.48321	108.794	48.7383	32.3588	21.618	0.000558266	0.473218	0.116469	14.5384	6.51302	4.32419	2.88887	2.2322	TRUE	FALSE	FALSE
BC008874.2	Homeobox protein SIX1	SIX1	FALSE	FALSE	9.78045	141.844	54.7835	42.189	24.2994	6.37339e-05	0.473218	0.00605122	14.5028	5.60133	4.3136	2.48449	2.58917	TRUE	FALSE	TRUE
BC033872.1	Fc fragment of IgE, high affinity I, receptor for; gamma polypeptide (FCER1G)	FCER1G	FALSE	FALSE	23.2299	335.599	100.29	99.8182	44.4839	0.000189025	0.700053	0.00542271	14.4469	4.31727	4.29697	1.91494	3.3463	TRUE	FALSE	TRUE
NM_138415.1	PHD finger protein 21B (PHF21B)	PHF21B	FALSE	FALSE	22.5023	324.484	149.633	96.512	66.3701	6.37339e-05	0.414124	0.00988381	14.42	6.64965	4.28898	2.94947	2.16854	TRUE	FALSE	TRUE
BC014020.1	BAI1-associated protein 2 (BAIAP2)	BAIAP2	TRUE	FALSE	74.2138	1067.56	224.199	317.527	99.4443	0.000150584	0.999999	5.14003e-05	14.3849	3.02099	4.27854	1.33997	4.76166	TRUE	FALSE	TRUE
NM_007250.2	Kruppel-like factor 8 (KLF8)	KLF8	FALSE	FALSE	11.949	171.409	73.6733	50.9826	32.6781	0	0.278479	0.000220409	14.3451	6.16567	4.2667	2.73481	2.32661	TRUE	FALSE	TRUE
BC038838.1	Proline-rich protein 16	PRR16	FALSE	FALSE	36.4684	520.607	396.074	154.846	175.68	0.000213382	0.419318	0.104543	14.2756	10.8607	4.24602	4.81732	1.31442	TRUE	FALSE	FALSE
NM_152243.1	Cdc42 effector protein 1	CDC42EP1	FALSE	FALSE	12.6832	180.366	86.219	53.6467	38.2428	0	0.278479	0.0139882	14.2209	6.79789	4.22975	3.01523	2.09195	TRUE	FALSE	TRUE
NM_014923.2	fibronectin type III domain containing 3A (FNDC3A), transcript variant 2	FNDC3A	FALSE	FALSE	16.9953	240.116	96.0955	71.4184	42.6235	0.000497648	0.613774	0.0160784	14.1284	5.65423	4.20223	2.50796	2.49872	TRUE	FALSE	TRUE
NP_002847.1	CD112 / Nectin-2 / PVRL2 Protein (His Tag)	NECTIN2	FALSE	FALSE	1.0078	14.2199	3.00275	4.22946	1.33188	0.0169279	0.999999	0.0131189	14.1098	2.9795	4.19671	1.32157	4.73562	TRUE	FALSE	TRUE
NM_000612	IGF-II Recombinant Human Protein	IGF2	FALSE	FALSE	7.60636	107.001	13.1973	31.8256	5.8537	0.00306972	0.999999	0.005952	14.0673	1.73503	4.18408	0.76958	8.1078	TRUE	FALSE	TRUE
NM_001325.1	cleavage stimulation factor, 3' pre-RNA, subunit 2, 64kDa (CSTF2)	CSTF2	FALSE	FALSE	39.2117	550.364	155.931	163.696	69.1639	0.00100115	0.999999	0.00292357	14.0357	3.97666	4.17468	1.76386	3.52953	TRUE	FALSE	TRUE
NM_134442.2	cAMP responsive element binding protein 1 (CREB1), transcript variant B	CREB1	FALSE	FALSE	10.5212	147.423	46.5221	43.8484	20.635	0.00076642	0.999999	0.00723334	14.012	4.42176	4.16763	1.96129	3.16888	TRUE	FALSE	TRUE
BC039244.1	Nuclear transcription factor Y subunit alpha	NFYA	FALSE	FALSE	8.28454	116.065	27.2322	34.5216	12.0789	0	0.866278	5.14003e-05	14.0098	3.28711	4.16698	1.45801	4.26205	TRUE	FALSE	TRUE
NM_013411.3	Adenylate kinase isoenzyme 2, mitochondrial	AK2	FALSE	FALSE	11.7228	163.989	43.8983	48.7756	19.4712	0.0414454	0.999999	0.0641975	13.9889	3.7447	4.16076	1.66098	3.73565	TRUE	FALSE	FALSE
NM_001006634.1	Rho GTPase activating protein 17 (ARHGAP17), transcript variant 1	ARHGAP17	FALSE	FALSE	23.998	332.528	74.6922	98.9046	33.13	0.000213382	0.999999	5.14003e-05	13.8565	3.11243	4.12136	1.38053	4.45197	TRUE	FALSE	TRUE
BC066353.1	LIM homeobox transcription factor 1, alpha (LMX1A)	LMX1A	FALSE	FALSE	18.3388	253.735	99.0511	75.4692	43.9345	0.000150584	0.473218	0.0147578	13.836	5.40119	4.11528	2.39572	2.56166	TRUE	FALSE	TRUE
NM_006403.2	neural precursor cell expressed, developmentally down-regulated 9 (NEDD9), transcript variant 1	NEDD9	FALSE	FALSE	15.2992	211.07	84.5812	62.7791	37.5163	0.000150584	0.473218	0.0172205	13.7961	5.52847	4.10342	2.45217	2.49547	TRUE	FALSE	TRUE
NM_201521.1	kinesin light chain 4 (KLC4), transcript variant 1	KLC4	FALSE	FALSE	21.17	291.032	107.1	86.5624	47.5047	0.000189025	0.609363	0.00653935	13.7473	5.05905	4.08891	2.24396	2.71738	TRUE	FALSE	TRUE
BC031650.1	Putative E3 ubiquitin-protein ligase SH3RF2	SH3RF2	FALSE	FALSE	38.5748	530.067	209.938	157.659	93.1187	0.00235584	0.999999	0.0109698	13.7413	5.44236	4.08711	2.41398	2.52488	TRUE	FALSE	TRUE
NM_032981.2	dystrobrevin, alpha (DTNA), transcript variant 8, mRNA.	DTNA	FALSE	FALSE	4.40996	59.9081	22.1419	17.8186	9.82114	0.000235325	0.818854	0.00758904	13.5847	5.0209	4.04055	2.22704	2.70564	TRUE	FALSE	TRUE
NM_014397.2	NIMA (never in mitosis gene a)-related kinase 6 (NEK6)	NEK6	FALSE	FALSE	5.56834	75.5687	17.1708	22.4766	7.61617	0	0.999999	0	13.5712	3.08365	4.0365	1.36776	4.401	TRUE	FALSE	TRUE
BC006222.2	chromosome 14 open reading frame 131 (C14orf131)	ZNF839	FALSE	FALSE	12.198	165.154	109.171	49.1221	48.4233	0.117746	0.657539	0.561925	13.5394	8.94994	4.02707	3.96978	1.51279	FALSE	FALSE	FALSE
NM_007190.2	SEC23 interacting protein (SEC23IP)	SEC23IP	FALSE	TRUE	11.4316	153.923	55.0958	45.7816	24.438	0.000150584	0.613967	0.00508816	13.4646	4.8196	4.00482	2.13775	2.79373	TRUE	FALSE	TRUE
NM_144594.1	family with sequence similarity 112, member B (FAM112B)	GTSF1	FALSE	FALSE	24.2793	324.482	190.429	96.5115	84.4657	0.000213382	0.418654	0.0812981	13.3645	7.84328	3.97505	3.47891	1.70395	TRUE	FALSE	FALSE
NM_181285.1	CKLF-like MARVEL transmembrane domain containing 1 (CMTM1), transcript variant 6, mRNA	CMTM1	FALSE	FALSE	16.6548	221.515	109.339	65.8858	48.4976	0.000150584	0.527964	0.00716377	13.3004	6.565	3.95597	2.91193	2.02595	TRUE	FALSE	TRUE
NM_002957.3	retinoid X receptor, alpha (RXRA)	RXRA	FALSE	FALSE	15.8057	208.658	84.5816	62.0617	37.5165	0.000235325	0.597651	0.0214951	13.2014	5.35133	3.92654	2.3736	2.46694	TRUE	FALSE	TRUE
BC030020.2	DEAD (Asp-Glu-Ala-Asp) box polypeptide 55 (DDX55)	DDX55	FALSE	FALSE	1.14191	15.074	13.4321	4.4835	5.95787	0.023241	0.643476	0.457487	13.2006	11.7628	3.9263	5.21745	1.12223	TRUE	FALSE	FALSE
BC001394.1	serpin peptidase inhibitor, clade B (ovalbumin), member 6 (SERPINB6)	SERPINB6	FALSE	FALSE	1.30517	17.2238	2.36195	5.12292	1.04765	0.00223559	0.999999	0.000321757	13.1966	1.80969	3.92509	0.802694	7.29219	TRUE	FALSE	TRUE
BC017724.1	FIP1 like 1 (S. cerevisiae) (FIP1L1)	FIP1L1	TRUE	TRUE	50.2019	661.958	288.89	196.888	128.138	0.000235325	0.657539	0.0127642	13.1859	5.75456	3.92192	2.55246	2.29138	TRUE	FALSE	TRUE
BC093051.1	Nuclear protein Hcc-1	SARNP	FALSE	TRUE	12.5715	165.595	45.8532	49.2534	20.3383	0.0253664	0.999999	0.106669	13.1723	3.6474	3.91787	1.61782	3.61142	TRUE	FALSE	FALSE
BC002859.1	zinc finger protein 434 (ZNF434)	ZSCAN32	FALSE	FALSE	32.3788	425.772	131.555	126.638	58.3517	0.000397623	0.95597	0.00246166	13.1497	4.06299	3.91115	1.80216	3.23646	TRUE	FALSE	TRUE
NM_019884.2	glycogen synthase kinase 3 alpha (GSK3A)	GSK3A	FALSE	TRUE	12.3896	162.739	66.5247	48.404	29.5073	0.000150584	0.537241	0.00660102	13.1352	5.36941	3.90683	2.38162	2.4463	TRUE	FALSE	TRUE
NM_006653.1	fibroblast growth factor receptor substrate 3 (FRS3)	FRS3	TRUE	FALSE	11.6943	153.536	70.3295	45.6665	31.1949	6.37339e-05	0.30601	0.0198166	13.1291	6.01401	3.90503	2.66754	2.18309	TRUE	FALSE	TRUE
NP_079515.2	PD-L2 / B7-DC / CD273 Protein	PDCD1LG2	FALSE	FALSE	1.44192	18.8298	5.18586	5.6006	2.30021	0.00878745	0.999999	0.0155058	13.0588	3.5965	3.88413	1.59524	3.63099	TRUE	FALSE	TRUE
NM_201443.1	TEA domain family member 4 (TEAD4), transcript variant 3	TEAD4	FALSE	FALSE	11.7344	153.117	61.1087	45.542	27.105	0.00114986	0.561423	0.0597607	13.0486	5.20766	3.88107	2.30988	2.50565	TRUE	FALSE	FALSE
NM_003221.1	transcription factor AP-2 beta (activating enhancer binding protein 2 beta) (TFAP2B)	TFAP2B	FALSE	FALSE	11.7185	152.807	69.4394	45.4497	30.8001	0	0.407279	0.00270356	13.0398	5.92562	3.87845	2.62833	2.20057	TRUE	FALSE	TRUE
BC064840.1	Histone deacetylase 7	HDAC7	FALSE	FALSE	20.7571	270.493	131.025	80.4535	58.1167	0.000213382	0.313414	0.141691	13.0313	6.3123	3.87595	2.79984	2.06444	TRUE	FALSE	FALSE
NM_002713.2	protein phosphatase 1, regulatory (inhibitor) subunit 8 (PPP1R8), transcript variant 3	PPP1R8	FALSE	FALSE	14.5597	189.045	80.0892	56.2281	35.5239	0.000213382	0.597651	0.0101688	12.9841	5.50073	3.86189	2.43987	2.36043	TRUE	FALSE	TRUE
NM_012360.1	Olfactory receptor, family 1, subfamily F, member 1 (OR1F1), mRNA	OR1F1	FALSE	FALSE	2.74276	35.5814	7.69059	10.5831	3.41119	0.00120743	0.999999	0.000971311	12.9729	2.80396	3.85855	1.24371	4.62662	TRUE	FALSE	TRUE
NM_001893.3	casein kinase 1, delta (CSNK1D), transcript variant 1	CSNK1D	FALSE	FALSE	9.73496	126.05	28.9719	37.4914	12.8506	0	0.968061	0	12.9482	2.97607	3.85121	1.32004	4.35077	TRUE	FALSE	TRUE
NM_025083.2	enhancer of mRNA decapping 3 homolog (S. cerevisiae) (EDC3)	EDC3	FALSE	FALSE	7.33555	94.6276	43.1527	28.1454	19.1405	0.00280918	0.561423	0.245224	12.8999	5.88267	3.83684	2.60928	2.19286	TRUE	FALSE	FALSE
NM_024540.2	mitochondrial ribosomal protein L24 (MRPL24), nuclear gene encoding mitochondrial protein, transcript variant 2	MRPL24	FALSE	FALSE	1.26835	16.3091	9.18227	4.85085	4.07283	0.00707627	0.561449	0.356093	12.8585	7.23953	3.82453	3.21112	1.77615	TRUE	FALSE	FALSE
NM_012145.2	deoxythymidylate kinase (thymidylate kinase) (DTYMK)	DTYMK	FALSE	FALSE	7.04906	90.5819	25.3173	26.942	11.2296	0.00186393	0.999999	0.011461	12.8502	3.59158	3.82207	1.59306	3.57787	TRUE	FALSE	TRUE
BC037900.2	C-terminal binding protein 2 (CTBP2)	CTBP2	FALSE	FALSE	22.0422	283.189	85.5097	84.2297	37.9281	0.000150584	0.66759	0.00270356	12.8476	3.87937	3.8213	1.72071	3.31178	TRUE	FALSE	TRUE
BC012330.1	basic leucine zipper transcription factor, ATF-like 2 (BATF2)	BATF2	FALSE	FALSE	25.7716	330.583	221.692	98.3261	98.3323	0.000150584	0.247275	0.168433	12.8274	8.60218	3.81529	3.81553	1.49118	TRUE	FALSE	FALSE
BC018732.1	cytochrome b5 reductase 1 (CYB5R1)	CYB5R1	FALSE	FALSE	1.14764	14.7154	20.8648	4.37683	9.25467	0.442298	0.999999	0.554934	12.8223	18.1807	3.81378	8.06412	0.705271	FALSE	FALSE	FALSE
NM_014420.2	dickkopf homolog 4 (Xenopus laevis) (DKK4)	DKK4	FALSE	FALSE	8.49748	108.838	36.5418	32.3719	16.2082	0.0193269	0.938757	0.209947	12.8083	4.30031	3.80959	1.90742	2.97845	TRUE	FALSE	FALSE
NM_002039.2	GRB2-associated binding protein 1 (GAB1), transcript variant 2, mRNA	GAB1	TRUE	TRUE	53.8022	688.166	279.803	204.683	124.108	0.00047588	0.606203	0.0356116	12.7907	5.20058	3.80436	2.30674	2.45947	TRUE	FALSE	TRUE
BC009820.2	chromosome 11 open reading frame 63 (C11orf63)	C11orf63	FALSE	FALSE	10.7198	136.74	35.3263	40.6709	15.6691	0.00117165	0.848045	0.0200976	12.7558	3.29543	3.794	1.4617	3.87076	TRUE	FALSE	TRUE
NM_152613.1	WBP2 N-terminal like (WBP2NL)	WBP2NL	FALSE	FALSE	13.761	175.071	58.4219	52.0717	25.9132	0.000235325	0.778633	0.0050128	12.7222	4.24546	3.784	1.88309	2.99666	TRUE	FALSE	TRUE
NM_032476.1	mitochondrial ribosomal protein S6 (MRPS6), nuclear gene encoding mitochondrial protein	MRPS6	FALSE	FALSE	11.2595	143.129	39.3944	42.5713	17.4735	0.00275594	0.875459	0.0372904	12.7118	3.49876	3.78091	1.55189	3.63324	TRUE	FALSE	TRUE
BC021174.1	Small EDRK-rich factor 1	SERF1A	FALSE	FALSE	0.960126	12.2041	2.03287	3.62991	0.901688	0.00119319	0.999999	0.000546161	12.711	2.1173	3.78066	0.939135	6.00339	TRUE	FALSE	TRUE
NM_005326.2	hydroxyacylglutathione hydrolase (HAGH), transcript variant 1	HAGH	FALSE	FALSE	7.64383	96.768	23.4337	28.782	10.3941	0.000497648	0.999999	5.14003e-05	12.6596	3.0657	3.76539	1.3598	4.12944	TRUE	FALSE	TRUE
NM_032306.2	alkB, alkylation repair homolog 7 (E. coli) (ALKBH7)	ALKBH7	FALSE	FALSE	6.85407	86.3264	28.5436	25.6763	12.6606	0.00882069	0.999999	0.088285	12.5949	4.16447	3.74613	1.84717	3.02437	TRUE	FALSE	FALSE
NP_940986.1	CA13 / CAXIII / Carbonic anhydrase 13 Protein (His Tag)	CA13	FALSE	FALSE	1.21511	15.2831	3.90381	4.54569	1.73155	0.00428886	0.999999	0.00400747	12.5775	3.21272	3.74097	1.42501	3.91492	TRUE	FALSE	TRUE
BC004921.1	hypothetical protein BC004921 (LOC93349)	SP140L	FALSE	FALSE	13.0114	162.646	36.347	48.3762	16.1218	0.000601515	0.999999	0.00139717	12.5003	2.79348	3.71799	1.23906	4.47481	TRUE	FALSE	TRUE
BC031828.1	kinesin heavy chain member 2A (KIF2A)	KIF2A	FALSE	FALSE	5.13467	63.9962	31.5853	19.0346	14.0098	0.00914685	0.732507	0.23833	12.4635	6.15137	3.70707	2.72846	2.02614	TRUE	FALSE	FALSE
BC095404.1	Protein transport protein Sec23B	SEC23B	FALSE	FALSE	9.62386	119.942	57.2679	35.6747	25.4014	0.000235325	0.435196	0.051411	12.463	5.95061	3.7069	2.63942	2.0944	TRUE	FALSE	FALSE
BC012098.1	glucan (1,4-alpha-), branching enzyme 1 (glycogen branching enzyme, Andersen disease, glycogen storage disease type IV) (GBE1)	GBE1	FALSE	FALSE	7.13773	88.882	26.0063	26.4364	11.5352	0.0311564	0.999999	0.0721479	12.4524	3.64349	3.70376	1.61609	3.41771	TRUE	FALSE	FALSE
XM_171154.3	Myelin protein zero-like protein 1	MPZL1	FALSE	FALSE	9.54113	118.768	45.0636	35.3256	19.9881	0.000268035	0.713682	0.00807825	12.4481	4.72309	3.70246	2.09494	2.63557	TRUE	FALSE	TRUE
BC037311.1	Voltage-dependent L-type calcium channel subunit beta-1	CACNB1	FALSE	FALSE	8.34086	103.723	40.1687	30.8505	17.817	0	0.418654	0.00155315	12.4355	4.81589	3.69872	2.13611	2.58217	TRUE	FALSE	TRUE
BC048299.1	spermatogenesis associated, serine-rich 2 (SPATS2)	SPATS2	FALSE	FALSE	18.161	225.626	110.093	67.1084	48.8321	0.000189025	0.454168	0.0284447	12.4236	6.06205	3.6952	2.68885	2.04941	TRUE	FALSE	TRUE
BC051304.1	tensin 1 (TNS1)	TNS1	FALSE	TRUE	7.76194	95.2403	63.0344	28.3276	27.9592	0.000150584	0.234097	0.184196	12.2702	8.12097	3.64955	3.60208	1.51093	TRUE	FALSE	FALSE
BC032499.1	globoside alpha-1,3-N-acetylgalactosaminyltransferase 1 (GBGT1)	GBGT1	FALSE	FALSE	0.921703	11.3063	24.0151	3.36286	10.652	0.00793604	0.254867	0.416116	12.2667	26.0551	3.64853	11.5568	0.4708	TRUE	FALSE	FALSE
NM_002376.2	MAP/microtubule affinity-regulating kinase 3 (MARK3)	MARK3	FALSE	FALSE	11.7543	143.159	49.8459	42.5801	22.1093	0	0.50997	0.000360777	12.1793	4.24066	3.62252	1.88096	2.87202	TRUE	FALSE	TRUE
NM_017877.2	chromosome 2 open reading frame 18 (C2orf18)	SLC35F6	FALSE	FALSE	4.10101	49.8526	18.369	14.8278	8.14763	0.00437803	0.999999	0.0373447	12.1562	4.47914	3.61565	1.98674	2.71396	TRUE	FALSE	TRUE
NM_000584	IL8 Endothelial Recombinant Human Protein	CXCL8	FALSE	FALSE	2.52905	30.7401	4.83191	9.14312	2.14321	0.00745196	0.999999	0.00164031	12.1548	1.91057	3.61525	0.847438	6.3619	TRUE	FALSE	TRUE
P20273	Siglec-2 / CD22 Protein (His Tag)	CD22	FALSE	FALSE	1.39	16.761	5.09719	4.98527	2.26088	0.00476229	0.999999	0.0039128	12.0583	3.66705	3.58653	1.62653	3.28828	TRUE	FALSE	TRUE
BC029566.1	Doublesex- and mab-3-related transcription factor B1	DMRTB1	FALSE	FALSE	18.3562	219.638	114.563	65.3274	50.8147	0.000268035	0.473218	0.057919	11.9653	6.2411	3.55888	2.76826	1.91719	TRUE	FALSE	FALSE
NM_014752.1	signal peptidase complex subunit 2 homolog (S. cerevisiae) (SPCS2)	SPCS2	FALSE	FALSE	7.03369	84.0183	30.5646	24.9898	13.557	0.00047588	0.788666	0.0140721	11.9451	4.34546	3.55287	1.92744	2.74888	TRUE	FALSE	TRUE
NM_205837.1	Leukocyte specific transcript 1 (LST1), transcript variant 2, mRNA	LST1	FALSE	FALSE	15.7509	188.124	92.1088	55.9541	40.8552	0.000150584	0.453577	0.0172484	11.9437	5.84784	3.55243	2.59383	2.04241	TRUE	FALSE	TRUE
NM_032883.1	TOX high mobility group box family member 2 (TOX2), transcript variant 3	TOX2	FALSE	FALSE	12.1537	145.155	35.8947	43.1737	15.9212	0	0.999999	0	11.9432	2.95339	3.55231	1.30999	4.0439	TRUE	FALSE	TRUE
BC023655.2	Pleiomorphic adenoma gene-like 2, mRNA (cDNA clone MGC:29597 IMAGE:4764127), complete cds	PLAGL2	FALSE	FALSE	2.97456	35.4618	7.54034	10.5475	3.34455	0	0.999999	0	11.9217	2.53494	3.5459	1.12438	4.70294	TRUE	FALSE	TRUE
BC050721.1	KIAA0562 (KIAA0562)	CEP104	FALSE	FALSE	19.0704	227.153	84.5588	67.5627	37.5063	0.000601515	0.866278	0.00269288	11.9113	4.43403	3.54281	1.96673	2.68633	TRUE	FALSE	TRUE
NM_030662.2	mitogen-activated protein kinase kinase 2 (MAP2K2)	MAP2K2	FALSE	FALSE	9.92412	117.755	39.1078	35.0242	17.3464	0	0.658464	0.000145229	11.8655	3.94069	3.5292	1.74791	3.01104	TRUE	FALSE	TRUE
NM_206855.1	quaking homolog, KH domain RNA binding (mouse) (QKI), transcript variant 4	QKI	FALSE	TRUE	19.4322	230.227	89.8615	68.477	39.8584	0.000301558	0.726424	0.00526346	11.8477	4.62436	3.5239	2.05115	2.56202	TRUE	FALSE	TRUE
NM_172390.1	Nuclear factor of activated T-cells, cytoplasmic, calcineurin-dependent 1 (NFATC1), transcript variant 1, mRNA	NFATC1	FALSE	FALSE	33.3848	395.174	179.804	117.538	79.7526	0.000150584	0.485633	0.00363656	11.837	5.3858	3.5207	2.38889	2.19781	TRUE	FALSE	TRUE
NM_001006665.1	ribosomal protein S6 kinase, 90kDa, polypeptide 1 (RPS6KA1), transcript variant 2	RPS6KA1	FALSE	FALSE	10.6625	125.515	30.0417	37.3323	13.3251	0	0.999999	0	11.7716	2.8175	3.50127	1.24971	4.17803	TRUE	FALSE	TRUE
NM_173472.1	Hypothetical protein MGC40179 (MGC40179), mRNA	FANCD2OS	FALSE	FALSE	2.40267	28.2682	7.80397	8.40788	3.46148	0.000235325	0.999999	0.000145229	11.7653	3.24804	3.49938	1.44068	3.62228	TRUE	FALSE	TRUE
BC017114.1	oligonucleotide/oligosaccharide-binding fold containing 2A (OBFC2A)	NABP1	FALSE	FALSE	28.5488	335.791	123.713	99.8753	54.8733	0.00293869	0.875459	0.0435487	11.762	4.33338	3.49841	1.92209	2.71428	TRUE	FALSE	TRUE
BC037845.1	Multiple coagulation factor deficiency protein 2	MCFD2	FALSE	FALSE	5.30505	62.3647	26.2321	18.5493	11.6353	0.0387599	0.999999	0.117034	11.7557	4.94474	3.49654	2.19326	2.37742	TRUE	FALSE	FALSE
BC032775.1	chromosome 1 open reading frame 142 (C1orf142)	SNAP47	FALSE	TRUE	10.5726	124.247	78.8444	36.9552	34.9717	0.00186393	0.485633	0.193187	11.7518	7.4574	3.49536	3.30776	1.57585	TRUE	FALSE	FALSE
NM_002093.2	glycogen synthase kinase 3 beta (GSK3B)	GSK3B	FALSE	FALSE	10.1382	118.374	42.836	35.2083	19	0	0.485633	0.00125746	11.676	4.22519	3.47282	1.8741	2.76343	TRUE	FALSE	TRUE
NM_148176.1	peptidylprolyl isomerase (cyclophilin)-like 2 (PPIL2), transcript variant 3	PPIL2	FALSE	FALSE	17.5111	204.357	93.6207	60.7825	41.5258	6.37339e-05	0.372766	0.00939594	11.6701	5.34636	3.47108	2.3714	2.18282	TRUE	FALSE	TRUE
BC033777.2	amyotrophic lateral sclerosis 2 (juvenile) chromosome region, candidate 8 (ALS2CR8)	CARF	FALSE	FALSE	19.4801	226.974	128.884	67.5096	57.1672	0.0054786	0.850792	0.139011	11.6516	6.61622	3.46557	2.93465	1.76107	TRUE	FALSE	FALSE
NM_014424.3	heat shock 27kDa protein family, member 7 (cardiovascular) (HSPB7)	HSPB7	FALSE	FALSE	20.6417	240.138	108.888	71.4248	48.2978	0.000601515	0.527964	0.0346624	11.6336	5.27515	3.46021	2.33981	2.20536	TRUE	FALSE	TRUE
NM_018273.2	transmembrane protein 143 (TMEM143)	TMEM143	FALSE	FALSE	3.6638	42.6026	12.8429	12.6714	5.6965	0.00135626	0.999999	0.000918116	11.628	3.50534	3.45854	1.55481	3.31722	TRUE	FALSE	TRUE
NM_004016.1	dystrophin (muscular dystrophy, Duchenne and Becker types) (DMD), transcript variant Dp71b	DMD	FALSE	FALSE	12.951	150.434	127.214	44.7441	56.4263	0.00105682	0.270156	0.501144	11.6156	9.8227	3.45486	4.35689	1.18253	TRUE	FALSE	FALSE
NP_001834.2	CNTN1 / Contactin-1 Protein (His Tag)	CNTN1	FALSE	TRUE	1.66426	19.3311	3.45023	5.74971	1.53036	0.00247022	0.999999	0.00032916	11.6155	2.07314	3.45482	0.919547	5.60285	TRUE	FALSE	TRUE
BC059405.1	Transducin-like enhancer protein 4	TLE4	TRUE	TRUE	17.0803	197.988	108.361	58.8882	48.0639	0.000150584	0.270959	0.0457042	11.5916	6.3442	3.44772	2.81399	1.82712	TRUE	FALSE	FALSE
NM_002344.3	leukocyte tyrosine kinase (LTK), transcript variant 1	LTK	FALSE	FALSE	8.40297	97.2332	18.6246	28.9203	8.261	0.0900022	0.999999	0.0149224	11.5713	2.21643	3.44168	0.983104	5.22069	FALSE	FALSE	FALSE
NM_002898.1	RNA binding motif, single stranded interacting protein 2 (RBMS2)	RBMS2	FALSE	FALSE	6.72844	77.8339	21.8054	23.1503	9.67185	0.000150584	0.999999	0.000220409	11.5679	3.24078	3.44067	1.43746	3.56948	TRUE	FALSE	TRUE
BC010099.2	Hypothetical protein FLJ13154, mRNA (cDNA clone IMAGE:3506308), complete cds	USB1	FALSE	FALSE	7.3075	84.4425	24.2804	25.116	10.7697	0.0123054	0.999999	0.0578296	11.5556	3.32267	3.43701	1.47378	3.4778	TRUE	FALSE	FALSE
NM_173822.1	family with sequence similarity 126, member B (FAM126B)	FAM126B	FALSE	FALSE	29.7963	344.082	161.507	102.341	71.6369	0.149523	0.999999	0.283221	11.5478	5.42036	3.43469	2.40422	2.13045	FALSE	FALSE	FALSE
NM_000359.1	transglutaminase 1 (K polypeptide epidermal type I, protein-glutamine-gamma-glutamyltransferase) (TGM1)	TGM1	FALSE	FALSE	13.4212	154.816	53.3956	46.0474	23.6838	0.0152289	0.931628	0.170352	11.5352	3.97844	3.43094	1.76465	2.89942	TRUE	FALSE	FALSE
NM_002007	FGF4 Recombinant Human Protein	FGF4	FALSE	FALSE	4.21452	48.608	12.2911	14.4576	5.45178	0.0219347	0.999999	0.0055965	11.5334	2.91638	3.43042	1.29357	3.95472	TRUE	FALSE	TRUE
NM_152285.1	arrestin domain containing 1 (ARRDC1)	ARRDC1	FALSE	FALSE	15.6314	180.218	81.3715	53.6027	36.0926	0.0321619	0.999999	0.163903	11.5292	5.20563	3.42917	2.30898	2.21476	TRUE	FALSE	FALSE
NM_005884.2	p21(CDKN1A)-activated kinase 4 (PAK4), transcript variant 1	PAK4	FALSE	FALSE	14.767	170.236	76.624	50.6339	33.9869	0.000213382	0.473218	0.0186362	11.5281	5.18886	3.42885	2.30154	2.22171	TRUE	FALSE	TRUE
BC025959.1	dynein, cytoplasmic 1, light intermediate chain 2 (DYNC1LI2)	DYNC1LI2	FALSE	FALSE	8.70422	100.188	47.0968	29.7992	20.89	0.00100115	0.657539	0.0261171	11.5103	5.4108	3.42353	2.39998	2.12728	TRUE	FALSE	TRUE
NM_016034.2	mitochondrial ribosomal protein S2 (MRPS2), nuclear gene encoding mitochondrial protein	MRPS2	FALSE	FALSE	5.84945	66.8787	21.5484	19.8919	9.55788	0.00114986	0.999999	0.0039146	11.4333	3.68383	3.40065	1.63398	3.10365	TRUE	FALSE	TRUE
BC036391.1	CUG triplet repeat, RNA binding protein 2 (CUGBP2)	CELF2	FALSE	FALSE	17.4	198.863	67.7588	59.1484	30.0546	0.000150584	0.889007	0.000389467	11.4289	3.89418	3.39933	1.72728	2.93487	TRUE	FALSE	TRUE
BC009048.1	tubulointerstitial nephritis antigen-like 1 (TINAGL1)	TINAGL1	FALSE	FALSE	4.88786	55.7627	16.2573	16.5856	7.21098	0.000235325	0.999999	0.000321757	11.4084	3.32605	3.39323	1.47528	3.43001	TRUE	FALSE	TRUE
NM_002749.2	mitogen-activated protein kinase 7 (MAPK7), transcript variant 3	MAPK7	FALSE	FALSE	26.9907	307.584	156.828	91.4855	69.5615	0.000150584	0.272914	0.0461911	11.3959	5.81044	3.38953	2.57724	1.96129	TRUE	FALSE	FALSE
BC024002.2	fibronectin type III domain containing 8 (FNDC8)	FNDC8	FALSE	FALSE	14.7363	167.535	75.1647	49.8303	33.3396	0.00237246	0.597651	0.0877507	11.3688	5.10064	3.38146	2.26241	2.2289	TRUE	FALSE	FALSE
XM_380135.2	PREDICTED: Homo sapiens hypothetical LOC401394 (LOC401394)	KIAA0087	FALSE	FALSE	9.78179	111.107	47.6133	33.047	21.119	0.00235584	0.834511	0.0538095	11.3586	4.86754	3.37842	2.15902	2.33354	TRUE	FALSE	FALSE
NM_018014.2	B-cell CLL/lymphoma 11A (zinc finger protein) (BCL11A), transcript variant 2	BCL11A	FALSE	FALSE	8.60311	97.5423	41.5983	29.0123	18.4511	0.000268035	0.554272	0.0122915	11.338	4.83527	3.3723	2.1447	2.34486	TRUE	FALSE	TRUE
NM_001039656.1	Tesmin	TESMIN	FALSE	FALSE	22.2109	251.142	128.56	74.6979	57.0233	0.000150584	0.312096	0.040046	11.3072	5.78815	3.36312	2.56736	1.9535	TRUE	FALSE	FALSE
NM_004966.2	heterogeneous nuclear ribonucleoprotein F (HNRPF), transcript variant 3	HNRNPF	FALSE	FALSE	37.853	427.325	53.2628	127.101	23.6249	0.011869	0.999999	0.000252772	11.2891	1.40709	3.35774	0.624122	8.02296	TRUE	FALSE	TRUE
NM_001025100.1	Myelin basic protein	MBP	TRUE	TRUE	8.71674	98.2752	19.5822	29.2303	8.68575	0.000497648	0.999999	0.00145647	11.2743	2.2465	3.35335	0.996445	5.0186	TRUE	FALSE	TRUE
NM_000449.2	regulatory factor X, 5 (influences HLA class II expression) (RFX5), transcript variant 1	RFX5	FALSE	FALSE	20.6747	232.491	137.706	69.1503	61.0801	0.00047588	0.597651	0.0408136	11.2452	6.6606	3.34468	2.95433	1.68831	TRUE	FALSE	FALSE
BC063390.1	hypothetical protein LOC51233, mRNA (cDNA clone MGC:75009 IMAGE:5170001), complete cds.	DRICH1	FALSE	FALSE	12.0101	135.049	82.0921	40.1679	36.4123	0.000213382	0.310378	0.0978961	11.2446	6.83528	3.34452	3.03181	1.64509	TRUE	FALSE	FALSE
NM_138634.1	Microseminoprotein, beta- (MSMB), transcript variant PSP57, mRNA	MSMB	FALSE	FALSE	6.50511	73.0553	16.6151	21.729	7.36968	0.000126635	0.999999	0	11.2305	2.55416	3.3403	1.13291	4.39693	TRUE	FALSE	TRUE
BC050535.1	muscleblind-like (Drosophila) (MBNL1)	MBNL1	FALSE	FALSE	8.33843	93.606	40.0688	27.8415	17.7726	0.00047588	0.788666	0.0087685	11.2258	4.80531	3.33893	2.13141	2.33613	TRUE	FALSE	TRUE
NM_003120.1	Spleen focus forming virus (SFFV) proviral integration oncogene spi1 (SPI1), mRNA	SPI1	FALSE	FALSE	3.86743	43.4037	10.9034	12.9097	4.83625	0.000235325	0.999999	5.14003e-05	11.2229	2.8193	3.33806	1.25051	3.98074	TRUE	FALSE	TRUE
BC029220.1	Transcription factor SOX-5	SOX5	FALSE	FALSE	11.97	133.47	73.0124	39.6983	32.3849	0.000189025	0.301346	0.0577421	11.1504	6.09962	3.31649	2.70551	1.82805	TRUE	FALSE	FALSE
NM_000993.2	ribosomal protein L31 (RPL31), transcript variant 1	RPL31	FALSE	FALSE	1.47911	16.4737	9.27204	4.8998	4.11265	0.00519605	0.700053	0.124863	11.1376	6.26867	3.31268	2.78049	1.7767	TRUE	FALSE	FALSE
NM_201564.1	synaptonemal complex central element protein 1 (SYCE1), transcript variant 2	SYCE1	FALSE	FALSE	14.64	163.009	152.501	48.4841	67.6424	0.0021271	0.303711	0.50928	11.1345	10.4168	3.31177	4.62039	1.0689	TRUE	FALSE	FALSE
NM_014034.1	ASF1 anti-silencing function 1 homolog A (S. cerevisiae) (ASF1A)	ASF1A	FALSE	FALSE	7.9975	89.0229	27.9742	26.4783	12.4081	0.00293869	0.999999	0.0155058	11.1314	3.49788	3.31083	1.5515	3.18232	TRUE	FALSE	TRUE
BC018722.1	alveolar soft part sarcoma chromosome region, candidate 1 (ASPSCR1)	ASPSCR1	FALSE	FALSE	24.9724	277.901	123.419	82.6569	54.7429	0.00145451	0.730932	0.0301958	11.1283	4.94221	3.30993	2.19213	2.25169	TRUE	FALSE	TRUE
BC025697.1	transcription factor 21 (TCF21)	TCF21	FALSE	FALSE	8.75842	97.2812	49.8598	28.9346	22.1155	0.0215663	0.586811	0.420325	11.1072	5.69279	3.30363	2.52506	1.95109	TRUE	FALSE	FALSE
NM_017798.2	YTH domain family, member 1 (YTHDF1), mRNA	YTHDF1	TRUE	TRUE	14.0856	156.172	49.8662	46.4507	22.1184	0	0.597651	5.14003e-05	11.0873	3.54023	3.29774	1.57028	3.13182	TRUE	FALSE	TRUE
BC051382.1	magnesium-dependent phosphatase 1 (MDP-1)	MDP1	FALSE	FALSE	6.83823	75.769	23.4352	22.5362	10.3948	0.00415995	0.999999	0.00889682	11.0802	3.42709	3.29562	1.5201	3.23313	TRUE	FALSE	TRUE
NP_000561.3	CD16b / FCGR3B Protein (His Tag)	FCGR3B	FALSE	FALSE	0.897875	9.84429	3.05572	2.92801	1.35538	0.0167527	0.999999	0.00954494	10.964	3.40328	3.26105	1.50954	3.22159	TRUE	FALSE	TRUE
NM_018282.1	Paraspeckle component 1	PSPC1	FALSE	FALSE	1.53806	16.8224	2.59631	5.00352	1.1516	0.0302055	0.999999	0.00246166	10.9374	1.68804	3.25314	0.748737	6.47933	TRUE	FALSE	TRUE
NM_015698.2	G patch domain and KOW motifs (GPKOW)	GPKOW	FALSE	TRUE	21.0372	230.019	79.3551	68.4152	35.1983	0.000150584	0.749606	0.00156762	10.9339	3.77213	3.25211	1.67314	2.8986	TRUE	FALSE	TRUE
NM_006460.1	hexamethylene bis-acetamide inducible 1 (HEXIM1)	HEXIM1	FALSE	FALSE	12.1566	132.762	52.7526	39.4877	23.3986	0.0435986	0.835367	0.372808	10.921	4.33942	3.24825	1.92477	2.51669	TRUE	FALSE	FALSE
BC006234.1	rhomboid domain containing 2 (RHBDD2)	RHBDD2	FALSE	FALSE	30.8909	337.274	152.364	100.316	67.5814	0.000425826	0.561423	0.0225524	10.9182	4.93231	3.24744	2.18774	2.21362	TRUE	FALSE	TRUE
BC067778.1	Regulatory factor X, 3 (influences HLA class II expression), mRNA (cDNA clone MGC:87155 IMAGE:5295394), complete cds	RFX3	FALSE	FALSE	8.98858	98.0002	20.9724	29.1485	9.30241	0.000213382	0.999999	5.14003e-05	10.9027	2.33323	3.24283	1.03491	4.67281	TRUE	FALSE	TRUE
NM_001004714.1	Olfactory receptor, family 4, subfamily K, member 13 (OR4K13), mRNA	OR4K13	FALSE	FALSE	1.75294	19.1039	3.6623	5.68213	1.62442	0.000365568	0.999999	0	10.8982	2.08923	3.24148	0.926685	5.21638	TRUE	FALSE	TRUE
NM_021178.1	cyclin B1 interacting protein 1 (CCNB1IP1), transcript variant 1	CCNB1IP1	FALSE	FALSE	13.5409	147.41	64.7792	43.8444	28.7331	0.000213382	0.654944	0.00305118	10.8862	4.78396	3.23792	2.12194	2.27557	TRUE	FALSE	TRUE
BC018028.1	DTW domain containing 1 (DTWD1)	DTWD1	FALSE	FALSE	1.70018	18.4953	12.1213	5.50109	5.37643	0.661838	0.999999	0.473825	10.8784	7.1294	3.2356	3.16227	1.52585	FALSE	FALSE	FALSE
NM_017848.1	family with sequence similarity 120C (FAM120C)	FAM120C	FALSE	FALSE	8.96969	97.4904	41.7829	28.9968	18.533	0.00313711	0.850792	0.0471985	10.8689	4.65823	3.23276	2.06618	2.33326	TRUE	FALSE	TRUE
BC092404.1	Rap guanine nucleotide exchange factor 3	RAPGEF3	FALSE	FALSE	11.2197	121.911	49.848	36.2602	22.1103	0.000150584	0.435196	0.00417419	10.8658	4.44289	3.23183	1.97066	2.44565	TRUE	FALSE	TRUE
NM_002497.1	NIMA (never in mitosis gene a)-related kinase 2 (NEK2)	NEK2	FALSE	FALSE	10.3258	112.19	38.3443	33.3691	17.0078	0.00561947	0.999999	0.0123813	10.865	3.71345	3.23162	1.64711	2.92586	TRUE	FALSE	TRUE
BC070364.1	T cell receptor alpha locus, mRNA (cDNA clone MGC:88373 IMAGE:4693137), complete cds	TRA	FALSE	FALSE	1.10799	12.0356	28.7788	3.57977	12.7649	0.0092241	0.247275	0.341436	10.8625	25.9738	3.23087	11.5208	0.41821	TRUE	FALSE	FALSE
NM_016139.2	coiled-coil-helix-coiled-coil-helix domain containing 2 (CHCHD2)	CHCHD2	FALSE	FALSE	12.6832	137.605	86.8157	40.9282	38.5074	0.00259185	0.66759	0.0968477	10.8494	6.84492	3.22695	3.03609	1.58502	TRUE	FALSE	FALSE
NM_007006.1	nudix (nucleoside diphosphate linked moiety X)-type motif 21 (NUDT21)	NUDT21	FALSE	FALSE	7.99946	86.7368	31.2594	25.7984	13.8652	0.0119887	0.999999	0.0148599	10.8428	3.90769	3.22502	1.73327	2.77475	TRUE	FALSE	TRUE
BC023527.2	Zinc finger protein SBZF3, mRNA (cDNA clone MGC:14334 IMAGE:4298348), complete cds	ZNF695	FALSE	FALSE	3.83048	41.4617	15.2683	12.3321	6.7723	0.000235325	0.999999	0.000190863	10.8242	3.986	3.21946	1.76801	2.71554	TRUE	FALSE	TRUE
NM_031219.2	haloacid dehalogenase-like hydrolase domain containing 3 (HDHD3)	HDHD3	FALSE	FALSE	10.3827	112.326	37.9251	33.4095	16.8218	0.226066	0.999999	0.475119	10.8186	3.65272	3.2178	1.62018	2.96179	FALSE	FALSE	FALSE
BC033728.1	Transcription initiation factor TFIID subunit 8	TAF8	FALSE	FALSE	12.4449	134.537	46.4348	40.0157	20.5963	0.000150584	0.818854	0.00169308	10.8106	3.73123	3.21543	1.655	2.89733	TRUE	FALSE	TRUE
BC008902.2	GRIP and coiled-coil domain-containing protein 1	GCC1	FALSE	FALSE	4.16983	44.9868	12.1569	13.3805	5.39224	0.712167	0.999999	0.237098	10.7886	2.91544	3.20889	1.29315	3.70052	FALSE	FALSE	FALSE
NM_020134.2	Dihydropyrimidinase-related protein 5	DPYSL5	TRUE	FALSE	10.7577	116.03	64.9484	34.5112	28.8081	0.000150584	0.274932	0.0295404	10.7858	6.03737	3.20804	2.6779	1.7865	TRUE	FALSE	FALSE
NM_001005210.1	Leucine-rich repeat-containing protein 55	LRRC55	FALSE	FALSE	23.3339	251.6	74.7659	74.8342	33.1627	6.37339e-05	0.726424	0.000293046	10.7826	3.20418	3.20711	1.42122	3.36518	TRUE	FALSE	TRUE
NM_014678.3	SAPS domain family, member 2 (SAPS2)	PPP6R2	FALSE	TRUE	21.0159	226.099	131.348	67.2494	58.2599	0.000189025	0.328179	0.0155058	10.7585	6.24992	3.19992	2.77218	1.72138	TRUE	FALSE	FALSE
NM_004355.1	CD74 molecule, major histocompatibility complex, class II invariant chain (CD74), transcript variant 2	CD74	FALSE	FALSE	28.5998	302.595	93.1098	90.0017	41.2992	0.000365568	0.999999	5.14003e-05	10.5803	3.25561	3.14693	1.44404	3.24988	TRUE	FALSE	TRUE
NM_002945.2	replication protein A1, 70kDa (RPA1)	RPA1	FALSE	FALSE	6.55293	69.3246	28.3614	20.6194	12.5798	0.170585	0.999999	0.238212	10.5792	4.32806	3.14659	1.91973	2.44433	FALSE	FALSE	FALSE
NM_001007156.1	neurotrophic tyrosine kinase, receptor, type 3 (NTRK3), transcript variant 3	NTRK3	FALSE	FALSE	16.0332	169.473	42.9928	50.4068	19.0696	0	0.999999	0	10.5701	2.68149	3.1439	1.18938	3.94189	TRUE	FALSE	TRUE
BC007363.1	branched chain ketoacid dehydrogenase kinase (BCKDK)	BCKDK	FALSE	FALSE	8.04938	85.0357	19.0713	25.2924	8.45913	0.00313013	0.999999	0.00246166	10.5643	2.36928	3.14216	1.0509	4.45884	TRUE	FALSE	TRUE
BC002559.1	YTH domain family, member 2 (YTHDF2)	YTHDF2	FALSE	FALSE	19.9367	210.29	91.9196	62.5472	40.7713	6.37339e-05	0.485633	0.00270356	10.5479	4.61058	3.1373	2.04504	2.28776	TRUE	FALSE	TRUE
AAH19931.1	CD32a / FCGR2A Protein (His Tag)	FCGR2A	FALSE	FALSE	1.84856	19.4812	4.83093	5.79435	2.14278	0.0101697	0.999999	0.00441344	10.5386	2.61334	3.13452	1.15916	4.0326	TRUE	FALSE	TRUE
NM_006426.1	dihydropyrimidinase-like 4 (DPYSL4)	DPYSL4	FALSE	FALSE	18.1532	191.296	128.51	56.8977	57.0013	0.00796979	0.673521	0.219975	10.5379	7.07921	3.1343	3.14001	1.48856	TRUE	FALSE	FALSE
NM_003179.2	Synaptophysin	SYP	FALSE	FALSE	11.7517	123.68	57.4343	36.7865	25.4752	0.00263822	0.749606	0.0384764	10.5244	4.88731	3.13031	2.16778	2.15342	TRUE	FALSE	TRUE
NM_173545.1	chromosome 2 open reading frame 13 (C2orf13)	APLF	FALSE	FALSE	15.6669	164.681	69.734	48.9815	30.9308	0.000150584	0.581095	0.00294879	10.5114	4.45104	3.12643	1.97428	2.36156	TRUE	FALSE	TRUE
NM_005663.2	Wolf-Hirschhorn syndrome candidate 2 (WHSC2)	NELFA	FALSE	FALSE	41.6533	437.345	177.324	130.081	78.6529	0.00100115	0.834511	0.0173204	10.4996	4.25715	3.12294	1.88827	2.46636	TRUE	FALSE	TRUE
NM_004454.1	ets variant gene 5 (ets-related molecule) (ETV5)	ETV5	FALSE	FALSE	24.8006	260.167	98.8	77.3823	43.8231	0.000459628	0.673586	0.0111921	10.4903	3.98377	3.12017	1.76701	2.63327	TRUE	FALSE	TRUE
NM_032403.1	protocadherin gamma subfamily C, 3 (PCDHGC3), transcript variant 3	PCDHGC3	FALSE	FALSE	16.6358	174.341	83.7216	51.8548	37.135	0.000497648	0.485633	0.0790557	10.4799	5.0326	3.11705	2.23223	2.08239	TRUE	FALSE	FALSE
BC039904.1	histone deacetylase 4 (HDAC4)	HDAC4	FALSE	FALSE	16.4675	171.924	94.7362	51.1358	42.0206	0.000301558	0.473218	0.0240217	10.4402	5.7529	3.10525	2.55172	1.81477	TRUE	FALSE	FALSE
BC009571.1	stimulated by retinoic acid 13 homolog (mouse) (STRA13)	CENPX	FALSE	FALSE	6.73171	70.2741	21.8734	20.9018	9.70205	0.0126118	0.999999	0.0498495	10.4393	3.24932	3.10498	1.44125	3.21276	TRUE	FALSE	TRUE
NM_005207.1	v-crk sarcoma virus CT10 oncogene homolog (avian)-like (CRKL)	CRKL	FALSE	FALSE	14.3502	149.623	58.8554	44.5027	26.1055	0	0.561423	0.00032916	10.4265	4.10137	3.10119	1.81918	2.54221	TRUE	FALSE	TRUE
Q96DU3	Ly108 / SLAMF6 Protein (His Tag)	SLAMF6	FALSE	FALSE	1.67068	17.4008	4.06559	5.17558	1.80331	0.00748727	0.999999	0.00151224	10.4154	2.43349	3.09789	1.07938	4.28003	TRUE	FALSE	TRUE
NM_020996	FGF6 Recombinant Human Protein	FGF6	FALSE	FALSE	4.51171	46.9821	5.26454	13.974	2.3351	0.00128423	0.999999	0	10.4134	1.16686	3.09728	0.517566	8.92427	TRUE	FALSE	TRUE
NM_001008239.1	chromosome 18 open reading frame 25 (C18orf25), transcript variant 2	C18orf25	FALSE	FALSE	14.4033	149.966	58.1254	44.6048	25.7817	0.000189025	0.473218	0.00708655	10.4119	4.03555	3.09684	1.78998	2.58004	TRUE	FALSE	TRUE
NM_080659.1	chromosome 11 open reading frame 52 (C11orf52)	C11orf52	FALSE	FALSE	6.68743	69.6247	23.3642	20.7087	10.3633	0.000711865	0.999999	0.00164031	10.4113	3.49374	3.09665	1.54966	2.97998	TRUE	FALSE	TRUE
NM_052940.3	leucine rich repeat containing 42 (LRRC42)	LRRC42	FALSE	FALSE	2.06609	21.4915	16.2243	6.39226	7.19637	0.0695831	0.936029	0.392385	10.402	7.85269	3.0939	3.48309	1.32464	FALSE	FALSE	FALSE
NM_205839.1	Leukocyte specific transcript 1 (LST1), transcript variant 4, mRNA	LST1	FALSE	FALSE	13.6141	141.536	80.0503	42.0973	35.5066	0.000986695	0.505069	0.100668	10.3963	5.87997	3.0922	2.60808	1.76809	TRUE	FALSE	FALSE
NM_022171.1	T-cell leukemia translocation altered gene (TCTA)	TCTA	FALSE	FALSE	1.52547	15.8472	12.5148	4.71349	5.55098	0.283519	0.818854	0.593473	10.3884	8.2039	3.08986	3.63887	1.26628	FALSE	FALSE	FALSE
BC033195.1	killer cell immunoglobulin-like receptor, three domains, X1 (KIR3DX1)	KIR3DX1	FALSE	FALSE	10.4663	108.534	38.3645	32.2816	17.0167	0.00759592	0.999999	0.054601	10.3698	3.66552	3.08433	1.62585	2.82903	TRUE	FALSE	FALSE
NM_005851.2	CDK2-associated protein 2 (CDK2AP2)	CDK2AP2	FALSE	FALSE	11.8498	122.867	42.946	36.5445	19.0489	0.0135653	0.985049	0.112136	10.3686	3.62419	3.08398	1.60752	2.86096	TRUE	FALSE	FALSE
Q13316	DMP1 Protein (His Tag)	DMP1	FALSE	FALSE	1.61215	16.7014	5.77266	4.96755	2.56049	0.416435	0.999999	0.400508	10.3597	3.58073	3.08133	1.58825	2.89319	FALSE	FALSE	FALSE
NM_144660.1	sterile alpha motif domain containing 8 (SAMD8)	SAMD8	FALSE	FALSE	17.6735	182.809	29.5959	54.3735	13.1274	0.0493415	0.999999	0.00445673	10.3437	1.6746	3.07656	0.742774	6.17684	TRUE	FALSE	TRUE
NM_001017926.1	Zinc fingers and homeoboxes protein 1	ZHX1	TRUE	FALSE	13.9648	144.247	60.0414	42.9039	26.6316	0.000150584	0.505069	0.00681482	10.3294	4.29948	3.07229	1.90705	2.40247	TRUE	FALSE	TRUE
BC022325.1	polyhomeotic homolog 3 (Drosophila) (PHC3)	PHC3	TRUE	FALSE	19.8998	204.737	66.4868	60.8956	29.4905	0.010559	0.999999	0.0089968	10.2884	3.34108	3.06011	1.48195	3.07937	TRUE	FALSE	TRUE
NM_173541.1	chromosome 10 open reading frame 91 (C10orf91)	C10orf91	FALSE	FALSE	42.8233	440.253	218.347	130.946	96.8488	0.00306972	0.568744	0.158585	10.2807	5.09879	3.05781	2.26159	2.0163	TRUE	FALSE	FALSE
NM_002739.1	protein kinase C, gamma (PRKCG)	PRKCG	TRUE	FALSE	3.59323	36.6105	14.1202	10.8891	6.26309	0.000235325	0.824618	0.00198925	10.1887	3.92968	3.03047	1.74303	2.59276	TRUE	FALSE	TRUE
NM_153498.1	calcium/calmodulin-dependent protein kinase ID (CAMK1D), transcript variant 2	CAMK1D	FALSE	TRUE	12.9899	131.958	72.9224	39.2486	32.345	0.00707627	0.613967	0.282398	10.1585	5.61376	3.02146	2.49001	1.80956	TRUE	FALSE	FALSE
BC015505.1	DEAD (Asp-Glu-Ala-Asp) box polypeptide 42 (DDX42)	DDX42	FALSE	FALSE	17.0424	172.815	59.6892	51.4009	26.4753	0.00891798	0.999999	0.017422	10.1403	3.5024	3.01607	1.5535	2.89525	TRUE	FALSE	TRUE
NM_018158.1	solute carrier family 4 (anion exchanger), member 1, adaptor protein (SLC4A1AP)	SLC4A1AP	FALSE	FALSE	12.7365	128.874	84.7767	38.3312	37.603	0.00235523	0.402945	0.313233	10.1184	6.6562	3.00956	2.95238	1.52015	TRUE	FALSE	FALSE
NM_032343.1	coiled-coil-helix-coiled-coil-helix domain containing 6 (CHCHD6)	CHCHD6	TRUE	FALSE	52.7454	533.681	199.618	158.734	88.5412	0.000601515	0.891772	0.00900027	10.1181	3.78455	3.00944	1.67865	2.67352	TRUE	FALSE	TRUE
NM_005299.1	G protein-coupled receptor 31 (GPR31)	GPR31	FALSE	FALSE	3.81646	38.5488	8.54969	11.4657	3.79225	0.0737397	0.999999	0.0089968	10.1006	2.24021	3.00426	0.993655	4.50879	FALSE	FALSE	FALSE
NM_003868.1	fibroblast growth factor 16 (FGF16)	FGF16	FALSE	FALSE	9.09464	91.6101	30.4874	27.2478	13.5228	0.0144913	0.822959	0.186773	10.073	3.35223	2.99603	1.4869	3.00485	TRUE	FALSE	FALSE
NM_198920.1	ubiquitin-conjugating enzyme E2C binding protein (UBE2CBP), mRNA.	UBE3D	FALSE	FALSE	5.15502	51.8849	16.2678	15.4323	7.21564	6.37339e-05	0.999999	0	10.0649	3.15572	2.99364	1.39973	3.18942	TRUE	FALSE	TRUE
NM_182918.2	v-ets erythroblastosis virus E26 oncogene homolog (avian) (ERG), transcript variant 1	ERG	FALSE	FALSE	6.18708	62.2374	26.1402	18.5115	11.5946	0.000150584	0.501727	0.00329872	10.0593	4.22497	2.99195	1.874	2.38091	TRUE	FALSE	TRUE
BC041793.1	kelch domain containing 3 (KLHDC3)	KLHDC3	FALSE	FALSE	5.6537	56.8294	16.677	16.9029	7.39713	0.00216302	0.999999	0.00440846	10.0517	2.94974	2.98971	1.30837	3.40766	TRUE	FALSE	TRUE
NM_002796.1	proteasome (prosome, macropain) subunit, beta type, 4 (PSMB4)	PSMB4	FALSE	FALSE	4.16654	41.8792	13.479	12.4563	5.97867	0.0321619	0.999999	0.1529	10.0513	3.23506	2.98959	1.43492	3.10699	TRUE	FALSE	FALSE
NM_003939.2	beta-transducin repeat containing (BTRC), transcript variant 2, mRNA.	BTRC	FALSE	FALSE	8.44687	84.834	40.5332	25.2324	17.9786	0.000235325	0.419318	0.0376854	10.0433	4.7986	2.98719	2.12844	2.09295	TRUE	FALSE	TRUE
BC033237.1	Hypothetical gene MGC45922, mRNA (cDNA clone MGC:45922 IMAGE:5428578), complete cds	MGC45922	FALSE	FALSE	14.8457	148.035	74.5507	44.0304	33.0672	0.0248424	0.999999	0.13977	9.97159	5.02172	2.96588	2.2274	1.98569	TRUE	FALSE	FALSE
BC000001.1	chitinase domain containing 1 (CHID1)	CHID1	FALSE	FALSE	5.35495	53.3973	15.4319	15.8821	6.84487	0.00187895	0.999999	0.000644682	9.97156	2.8818	2.96587	1.27823	3.46019	TRUE	FALSE	TRUE
NM_170707.1	Lamin-A/C	LMNA	TRUE	TRUE	14.1368	140.909	107.989	41.9108	47.899	0.00531591	0.561423	0.341481	9.96752	7.63889	2.96467	3.38826	1.30484	TRUE	FALSE	FALSE
BC051695.1	FERM domain containing 8 (FRMD8)	FRMD8	FALSE	FALSE	5.91297	58.7582	26.3593	17.4766	11.6918	0.211176	0.999999	0.347708	9.93717	4.45788	2.95564	1.97731	2.22913	FALSE	FALSE	FALSE
Q9UGN4	CD300A / CMRF-35H / IGSF12 Protein (His Tag)	CD300A	FALSE	FALSE	1.96495	19.4943	5.51294	5.79825	2.44529	0.00187895	0.999999	0.00032916	9.92101	2.80564	2.95083	1.24445	3.5361	TRUE	FALSE	TRUE
NM_001004354.1	Notch-regulated ankyrin repeat protein (NRARP)	NRARP	FALSE	FALSE	8.95558	88.8249	39.4907	26.4194	17.5163	0.0615168	0.999999	0.247619	9.91839	4.40962	2.95005	1.9559	2.24926	FALSE	FALSE	FALSE
NM_032848.1	chromosome 12 open reading frame 52 (C12orf52)	RITA1	FALSE	FALSE	9.45502	93.6665	67.5442	27.8595	29.9595	0	0.233856	0.0404284	9.90654	7.14374	2.94653	3.16863	1.38674	TRUE	FALSE	FALSE
NM_001001852.2	pim-3 oncogene (PIM3)	PIM3	FALSE	FALSE	11.6116	114.725	59.0675	34.1229	26.1996	0.14986	0.999999	0.220913	9.88021	5.08695	2.9387	2.25634	1.94227	FALSE	FALSE	FALSE
NM_016016.1	solute carrier family 25, member 39 (SLC25A39)	SLC25A39	FALSE	FALSE	4.79489	47.3732	13.6925	14.0903	6.07335	0.00180234	0.999999	0.00059609	9.87993	2.85564	2.93861	1.26663	3.45979	TRUE	FALSE	TRUE
NM_013232.2	programmed cell death 6 (PDCD6)	PDCD6	FALSE	FALSE	11.3824	112.434	27.2234	33.4415	12.075	0.00488871	0.999999	0.00370753	9.87783	2.3917	2.93799	1.06085	4.13004	TRUE	FALSE	TRUE
NM_000486.2	aquaporin 2 (collecting duct) (AQP2)	AQP2	FALSE	FALSE	4.36808	43.1435	14.1461	12.8323	6.27455	0.00189857	0.999999	0.00730127	9.87699	3.23851	2.93774	1.43645	3.04985	TRUE	FALSE	TRUE
NM_024299.2	chromosome 20 open reading frame 149 (C20orf149)	PPDPF	FALSE	FALSE	15.256	150.576	89.4236	44.7862	39.6642	0.00390565	0.621906	0.122041	9.86991	5.86152	2.93563	2.5999	1.68385	TRUE	FALSE	FALSE
BC048099.1	zinc finger and SCAN domain containing 1 (ZSCAN1)	ZSCAN1	FALSE	FALSE	9.17889	90.4356	30.4231	26.8985	13.4943	0.00379413	0.999999	0.0188178	9.85256	3.31446	2.93047	1.47014	2.9726	TRUE	FALSE	TRUE
NM_007002.1	adhesion regulating molecule 1 (ADRM1), transcript variant 1	ADRM1	FALSE	TRUE	22.9078	225.373	91.8879	67.0333	40.7572	0.00285528	0.999999	0.0145558	9.83829	4.01121	2.92623	1.77919	2.4527	TRUE	FALSE	TRUE
NM_005876.3	SPEG complex locus (SPEG)	SPEG	FALSE	FALSE	10.5116	103.407	39.3555	30.7565	17.4563	0.0440672	0.999999	0.170761	9.83737	3.744	2.92596	1.66067	2.6275	TRUE	FALSE	FALSE
NM_005710.1	polyglutamine binding protein 1 (PQBP1), transcript variant 1	PQBP1	FALSE	FALSE	13.0379	127.677	34.2653	37.9752	15.1985	0.000189025	0.999999	0.000321757	9.79277	2.62814	2.91269	1.16572	3.72613	TRUE	FALSE	TRUE
BC033219.1	Leucine zipper protein 1, mRNA (cDNA clone IMAGE:5017908), complete cds	LUZP1	TRUE	TRUE	23.6914	231.943	100.032	68.9873	44.3697	6.37339e-05	0.473218	0.00278095	9.79015	4.2223	2.91191	1.87282	2.31868	TRUE	FALSE	TRUE
NM_016203.2	protein kinase, AMP-activated, gamma 2 non-catalytic subunit (PRKAG2), transcript variant a, mRNA.	PRKAG2	FALSE	FALSE	9.32169	91.1162	35.7384	27.1009	15.8519	0.000601515	0.818854	0.00470438	9.77464	3.8339	2.9073	1.70054	2.54953	TRUE	FALSE	TRUE
NM_003583.2	dual-specificity tyrosine-(Y)-phosphorylation regulated kinase 2 (DYRK2), transcript variant 1	DYRK2	FALSE	FALSE	12.0208	117.45	47.9811	34.9336	21.2822	0.00345009	0.973176	0.0295232	9.77061	3.99152	2.9061	1.77045	2.44784	TRUE	FALSE	TRUE
BC037963.1	Beta-adrenergic receptor kinase 1	GRK2	FALSE	FALSE	2.00698	19.5725	27.0826	5.8215	12.0126	0.215064	0.766906	0.580288	9.75222	13.4942	2.90063	5.98542	0.722695	FALSE	FALSE	FALSE
NM_004310.2	ras homolog gene family, member H (RHOH)	RHOH	FALSE	FALSE	5.19338	50.636	17.1028	15.0608	7.58599	0.00114986	0.999999	0.00230645	9.7501	3.29319	2.9	1.46071	2.96069	TRUE	FALSE	TRUE
NM_031299.2	cell division cycle associated 3 (CDCA3)	CDCA3	FALSE	FALSE	22.1611	215.716	61.759	64.1609	27.3934	0.0810296	0.999999	0.0205643	9.73398	2.78682	2.8952	1.2361	3.49286	FALSE	FALSE	FALSE
NM_007041.1	Arginyl-tRNA--protein transferase 1	ATE1	FALSE	FALSE	5.99707	58.3479	13.8462	17.3546	6.14152	0.000213382	0.999999	0	9.72941	2.30882	2.89384	1.02409	4.21401	TRUE	FALSE	TRUE
BC050393.1	F-box protein 25 (FBXO25)	FBXO25	FALSE	FALSE	4.29143	41.6837	11.9587	12.3981	5.30433	0.000877934	0.999999	0.00164031	9.71323	2.78665	2.88903	1.23603	3.48563	TRUE	FALSE	TRUE
NM_024012.1	5-hydroxytryptamine (serotonin) receptor 5A (HTR5A)	HTR5A	FALSE	FALSE	4.36808	42.4052	10.1222	12.6127	4.48976	0.00270497	0.999999	0.00204476	9.70798	2.31732	2.88747	1.02786	4.18931	TRUE	FALSE	TRUE
BC027622.2	pipecolic acid oxidase (PIPOX)	PIPOX	FALSE	FALSE	9.85481	95.6311	42.0249	28.4438	18.6403	0.0563938	0.999999	0.292222	9.704	4.26441	2.88629	1.89149	2.27558	FALSE	FALSE	FALSE
BC012576.1	bromodomain adjacent to zinc finger domain, 2B, mRNA (cDNA clone IMAGE:4290975), complete cds.	BAZ2B	FALSE	FALSE	15.5575	150.897	88.5424	44.8816	39.2733	0.000397623	0.613967	0.0107884	9.6993	5.6913	2.88489	2.5244	1.70423	TRUE	FALSE	FALSE
BC003129.1	Non-POU domain containing, octamer-binding, mRNA (cDNA clone MGC:3380 IMAGE:2957871), complete cds	NONO	FALSE	FALSE	14.9049	144.467	39.5844	42.9691	17.5578	0.000301558	0.999999	0.000190863	9.69256	2.6558	2.88288	1.17799	3.64958	TRUE	FALSE	TRUE
NM_006626.3	Zinc finger protein 482 (ZNF482), mRNA	ZBTB6	FALSE	FALSE	2.67693	25.8747	6.21163	7.69597	2.75519	0.00193274	0.999999	0.000360777	9.66582	2.32043	2.87493	1.02924	4.16552	TRUE	FALSE	TRUE
NM_017923.2	E3 ubiquitin-protein ligase MARCH1	MARCH1	FALSE	FALSE	4.01482	38.726	9.78535	11.5184	4.34033	0.000235325	0.999999	0	9.64577	2.43731	2.86897	1.08108	3.95755	TRUE	FALSE	TRUE
NM_004449.3	v-ets erythroblastosis virus E26 oncogene homolog (avian) (ERG), transcript variant 2	ERG	FALSE	FALSE	18.2569	175.932	104.329	52.3278	46.2756	0.00165847	0.414124	0.2478	9.63642	5.7145	2.86619	2.53469	1.68631	TRUE	FALSE	FALSE
BC005383.1	centrin, EF-hand protein, 3 (CDC31 homolog, yeast) (CETN3)	CETN3	FALSE	FALSE	6.14253	59.0369	8.90666	17.5595	3.95058	0.00298079	0.999999	5.14003e-05	9.61116	1.45	2.85867	0.643152	6.6284	TRUE	FALSE	TRUE
NM_024953.2	chromosome 12 open reading frame 30 (C12orf30)	NAA25	FALSE	FALSE	5.24264	50.3443	14.6441	14.974	6.49543	0.00293869	0.999999	0.0024718	9.60285	2.79326	2.8562	1.23896	3.43786	TRUE	FALSE	TRUE
BC032833.2	ankyrin repeat domain 13A (ANKRD13A)	ANKRD13A	FALSE	FALSE	1.39148	13.3602	2.52669	3.97377	1.12072	0.0170197	0.999999	0.00101969	9.60147	1.81583	2.85579	0.805419	5.28764	TRUE	FALSE	TRUE
NM_015532.2	glutamate receptor, ionotropic, N-methyl D-aspartate-like 1A (GRINL1A), transcript variant 1	POLR2M	FALSE	FALSE	23.5908	226.487	99.7261	67.3645	44.2339	0.000213382	0.501727	0.025796	9.60063	4.22733	2.85554	1.87505	2.27109	TRUE	FALSE	TRUE
BC018426.1	Protein URG4	URGCP	FALSE	FALSE	5.26377	50.4821	12.2609	15.015	5.43839	0	0.999999	0	9.59047	2.32931	2.85252	1.03317	4.11731	TRUE	FALSE	TRUE
BC006375.2	dual-specificity tyrosine-(Y)-phosphorylation regulated kinase 2 (DYRK2)	DYRK2	FALSE	FALSE	9.45379	90.4906	29.1663	26.9149	12.9368	0.000213382	0.999999	5.14003e-05	9.57188	3.08514	2.84699	1.36842	3.10258	TRUE	FALSE	TRUE
BC015165.1	exocyst complex component 7 (EXOC7)	EXOC7	FALSE	FALSE	19.0794	182.548	76.1628	54.2957	33.7823	0.000986695	0.700053	0.0115758	9.56777	3.99188	2.84577	1.77061	2.39681	TRUE	FALSE	TRUE
NP_000604.1	HPX / Hemopexin Protein (His Tag)	HPX	FALSE	FALSE	0.966941	9.24786	3.71462	2.75062	1.64763	0.0179394	0.999999	0.0346003	9.56403	3.84161	2.84466	1.70396	2.48959	TRUE	FALSE	TRUE
NM_152576.1	hypothetical protein MGC24103 (MGC24103)	MGC24103	FALSE	FALSE	15.2783	145.974	60.1529	43.4176	26.681	0.0014945	0.673586	0.054601	9.55436	3.93714	2.84178	1.74633	2.42673	TRUE	FALSE	FALSE
NM_002813.4	proteasome (prosome, macropain) 26S subunit, non-ATPase, 9 (PSMD9)	PSMD9	FALSE	FALSE	9.76605	93.3079	25.5409	27.7528	11.3287	0.000213382	0.999999	5.14003e-05	9.55431	2.61527	2.84176	1.16001	3.65328	TRUE	FALSE	TRUE
NM_003945.3	V-type proton ATPase subunit e 1	ATP6V0E1	FALSE	FALSE	4.61836	44.1069	10.5301	13.1188	4.67068	0.00158812	0.999999	5.14003e-05	9.55034	2.28006	2.84058	1.01133	4.18864	TRUE	FALSE	TRUE
NM_003621.1	PTPRF interacting protein, binding protein 2 (liprin beta 2) (PPFIBP2)	PPFIBP2	FALSE	FALSE	8.97757	85.4711	41.2619	25.4219	18.3019	0.0213822	0.697781	0.352305	9.52051	4.59611	2.83171	2.03862	2.07143	TRUE	FALSE	FALSE
NM_012478.2	WW domain binding protein 2 (WBP2)	WBP2	TRUE	FALSE	18.8853	179.615	96.2968	53.4234	42.7128	0.0155962	0.887051	0.155887	9.51083	5.09903	2.82883	2.2617	1.86522	TRUE	FALSE	FALSE
BC013648.1	EF-hand domain family, member D2 (EFHD2)	EFHD2	FALSE	FALSE	4.77377	45.3296	20.8684	13.4825	9.25626	0.000189025	0.453577	0.00206613	9.49555	4.37147	2.82429	1.93898	2.17216	TRUE	FALSE	TRUE
NM_004596.1	small nuclear ribonucleoprotein polypeptide A (SNRPA)	SNRPA	FALSE	FALSE	10.7426	101.956	57.3652	30.325	25.4446	0.0021271	0.850792	0.0424548	9.49082	5.33998	2.82288	2.36857	1.77731	TRUE	FALSE	FALSE
NM_207005.1	upstream transcription factor 1 (USF1), transcript variant 2	USF1	FALSE	FALSE	18.9252	179.532	76.1434	53.3986	33.7737	0.0238289	0.999999	0.116698	9.4864	4.02339	2.82157	1.78459	2.35781	TRUE	FALSE	FALSE
NM_152688.1	KH domain containing, RNA binding, signal transduction associated 2 (KHDRBS2)	KHDRBS2	FALSE	FALSE	10.5917	100.434	39.8322	29.8723	17.6677	0.000213382	0.581095	0.00694101	9.48229	3.7607	2.82034	1.66807	2.52142	TRUE	FALSE	TRUE
BC028919.1	Protein Tob2	TOB2	FALSE	FALSE	20.7176	196.405	71.4653	58.4172	31.6987	6.37339e-05	0.810806	5.14003e-05	9.48009	3.4495	2.81969	1.53004	2.74826	TRUE	FALSE	TRUE
NM_004560.2	Tyrosine-protein kinase transmembrane receptor ROR2	ROR2	FALSE	FALSE	14.7845	140.095	56.3109	41.6689	24.9769	0.000268035	0.850792	0.00230645	9.47583	3.80878	2.81842	1.6894	2.48789	TRUE	FALSE	TRUE
BC047943.1	mRNA similar to oocyte-specific histone H1 (cDNA clone MGC:50807 IMAGE:5742122), complete cds	H1FOO	FALSE	FALSE	3.11143	29.4452	8.42206	8.75795	3.73563	0.000150584	0.999999	0	9.46355	2.70681	2.81477	1.20062	3.4962	TRUE	FALSE	TRUE
NM_032019.4	Histone deacetylase 10	HDAC10	FALSE	FALSE	5.90038	55.7966	20.5703	16.5957	9.12405	0.000601515	0.941817	0.004211	9.45645	3.48627	2.81266	1.54635	2.71248	TRUE	FALSE	TRUE
BC027951.1	Cas scaffolding protein family member 4	CASS4	FALSE	FALSE	75.46	711.232	354.28	211.544	157.142	0.000711865	0.485633	0.0669923	9.42528	4.69494	2.80339	2.08246	2.00754	TRUE	FALSE	FALSE
BC016057.1	Usher syndrome 1C (autosomal recessive, severe) (USH1C)	USH1C	FALSE	FALSE	10.2084	96.1806	33.8777	28.6072	15.0266	0.109365	0.999999	0.320508	9.4217	3.3186	2.80232	1.47198	2.83906	FALSE	FALSE	FALSE
NM_145018.2	chromosome 11 open reading frame 82 (C11orf82)	DDIAS	FALSE	FALSE	5.05173	47.5834	10.9418	14.1529	4.85328	0.00100115	0.999999	5.14003e-05	9.41923	2.16595	2.80159	0.960716	4.34877	TRUE	FALSE	TRUE
BC017305.1	sirtuin (silent mating type information regulation 2 homolog) 7 (S. cerevisiae) (SIRT7)	SIRT7	FALSE	FALSE	5.46522	51.3759	13.4977	15.2809	5.98694	0.00190852	0.999999	0.00142729	9.40052	2.46974	2.79602	1.09546	3.80628	TRUE	FALSE	TRUE
NP_004374	CSK Recombinant Human Protein	CSK	FALSE	FALSE	5.89114	55.3138	15.7253	16.4521	6.975	0.00146125	0.999999	0.00059609	9.38931	2.66931	2.79269	1.18398	3.51751	TRUE	FALSE	TRUE
NM_021218.1	chromosome 9 open reading frame 80 (C9orf80)	INIP	FALSE	FALSE	14.4826	135.972	55.0971	40.4426	24.4385	0.0122952	0.999999	0.0346003	9.38866	3.80437	2.79249	1.68744	2.46786	TRUE	FALSE	TRUE
NM_000754.2	catechol-O-methyltransferase (COMT), transcript variant MB-COMT	COMT	FALSE	FALSE	8.73111	81.8711	46.3492	24.3511	20.5584	0.438132	0.999999	0.31096	9.37694	5.30851	2.78901	2.35461	1.7664	FALSE	FALSE	FALSE
Invitrogen: PM_2127, CTL2127	beta-2-glycoprotein-1	APOH	FALSE	FALSE	8.68113	81.3301	18.8836	24.1902	8.3759	0.000334054	0.999999	0	9.3686	2.17525	2.78653	0.96484	4.30691	TRUE	FALSE	TRUE
NM_144770.1	RNA binding motif protein 11 (RBM11)	RBM11	FALSE	FALSE	3.48138	32.5835	8.77601	9.69139	3.89263	0.00120743	0.999999	0.00077041	9.35936	2.52084	2.78378	1.11813	3.71279	TRUE	FALSE	TRUE
BC005127.2	Adipophilin	PLIN2	FALSE	FALSE	16.8757	157.776	54.669	46.9276	24.2486	0.00424893	0.999999	0.00926792	9.3493	3.23951	2.78079	1.4369	2.88602	TRUE	FALSE	TRUE
NM_002880.1	v-raf-1 murine leukemia viral oncogene homolog 1 (RAF1)	RAF1	FALSE	FALSE	9.36749	87.5701	32.6853	26.0462	14.4977	0.00420046	0.999999	0.00603053	9.3483	3.48923	2.78049	1.54766	2.67919	TRUE	FALSE	TRUE
NM_198081.1	sex comb on midleg-like 4 (Drosophila) (SCML4)	SCML4	FALSE	FALSE	9.76029	91.221	58.7622	27.1321	26.0642	0.000189025	0.247275	0.0772193	9.34614	6.02054	2.77985	2.67043	1.55238	TRUE	FALSE	FALSE
NM_032464.1	linker for activation of T cells family, member 2 (LAT2), transcript variant 1	LAT2	FALSE	FALSE	10.2898	96.0764	24.9184	28.5763	11.0526	0.00882069	0.999999	0.00631451	9.33703	2.42165	2.77714	1.07413	3.85565	TRUE	FALSE	TRUE
BC006195.1	ATP citrate lyase (ACLY)	ACLY	FALSE	FALSE	9.72268	90.6905	58.6195	26.9743	26.0009	0.0043118	0.447509	0.371316	9.32772	6.02916	2.77437	2.67425	1.5471	TRUE	FALSE	FALSE
NM_004865.2	TBP-like 1 (TBPL1)	TBPL1	FALSE	FALSE	4.84415	45.0245	17.7912	13.3918	7.89133	0.00244898	0.999999	0.0039128	9.29461	3.67271	2.76452	1.62904	2.53072	TRUE	FALSE	TRUE
BC014394.1	A.T hook DNA-binding motif-containing protein 1	AHDC1	FALSE	TRUE	55.9061	519.277	177.85	154.45	78.8861	0.00247022	0.887403	0.0186362	9.28837	3.18123	2.76266	1.41105	2.91974	TRUE	FALSE	TRUE
NP_003010.4	SFTPD / SP-D Protein (His Tag)	SFTPD	FALSE	FALSE	1.88225	17.4762	6.06049	5.198	2.68815	0.0404587	0.973176	0.236897	9.28476	3.21981	2.76159	1.42816	2.88364	TRUE	FALSE	FALSE
BC016341.1	interferon stimulated exonuclease gene 20kDa (ISG20)	ISG20	FALSE	FALSE	7.97515	74.0077	20.368	22.0123	9.03428	0.024643	0.999999	0.0384764	9.27978	2.55393	2.76011	1.1328	3.63354	TRUE	FALSE	TRUE
NM_000585	IL15 Recombinant Human Protein	IL15	FALSE	FALSE	2.76565	25.6407	12.4667	7.62637	5.52966	0.00196593	0.748808	0.0426487	9.27112	4.50771	2.75754	1.99941	2.05673	TRUE	FALSE	TRUE
NM_014089.2	nucleoporin like 1 (NUPL1), transcript variant 1	NUP58	FALSE	FALSE	15.3343	142.109	44.1732	42.268	19.5932	0.00047588	0.999999	0.00032916	9.2674	2.88068	2.75643	1.27774	3.21709	TRUE	FALSE	TRUE
NM_017861.1	phosphatidylinositol glycan anchor biosynthesis, class X (PIGX)	PIGX	FALSE	FALSE	4.37939	40.4908	13.5271	12.0433	6.00001	0.0149967	0.999999	0.0129611	9.24577	3.08882	2.74999	1.37006	2.9933	TRUE	FALSE	TRUE
NM_001001711.1	Protein DDI1 homolog 1	DDI1	FALSE	FALSE	14.0341	129.721	68.2711	38.5833	30.2819	0.00914601	0.848045	0.0828052	9.24328	4.86465	2.74925	2.15774	1.90009	TRUE	FALSE	FALSE
NM_001008756.1	germinal center expressed transcript 2 (GCET2), transcript variant 2	GCSAM	FALSE	FALSE	12.0212	111.061	43.8397	33.0331	19.4452	0.00830362	0.999999	0.0752566	9.23877	3.64687	2.74791	1.61758	2.53334	TRUE	FALSE	FALSE
NM_002253.1	kinase insert domain receptor (a type III receptor tyrosine kinase) (KDR)	KDR	FALSE	FALSE	7.28202	67.2697	23.3917	20.0082	10.3755	0.000365568	0.999999	0.00123775	9.23778	3.21225	2.74762	1.42481	2.87579	TRUE	FALSE	TRUE
NM_001895.1	casein kinase 2, alpha 1 polypeptide (CSNK2A1), transcript variant 2	CSNK2A1	FALSE	TRUE	11.4543	105.667	29.4809	31.4287	13.0764	0.000711865	0.999999	0.000481596	9.22507	2.57379	2.74384	1.14161	3.58424	TRUE	FALSE	TRUE
NM_144947.1	Kallikrein 11 (KLK11), transcript variant 2, mRNA	KLK11	FALSE	FALSE	10.3547	95.4339	29.6453	28.3852	13.1493	0.00406191	0.999999	0.00241143	9.21652	2.863	2.74129	1.26989	3.21919	TRUE	FALSE	TRUE
NM_002215.1	Inter-alpha-trypsin inhibitor heavy chain H1	ITIH1	FALSE	FALSE	3.50566	32.2831	8.27085	9.60204	3.66857	0.000213382	0.999999	0	9.20883	2.35928	2.73901	1.04647	3.90323	TRUE	FALSE	TRUE
NM_014551.3	non-SMC condensin II complex, subunit H2 (NCAPH2), transcript variant 1	NCAPH2	FALSE	FALSE	15.2897	140.465	16.9197	41.7788	7.50481	0.00186393	0.999999	5.14003e-05	9.1869	1.10661	2.73248	0.490842	8.30183	TRUE	FALSE	TRUE
BC017407.1	zinc finger protein 266 (ZNF266)	ZNF266	FALSE	FALSE	4.73079	43.3503	8.17554	12.8938	3.62629	0.000213382	0.999999	0	9.16343	1.72815	2.72551	0.766529	5.30244	TRUE	FALSE	TRUE
NM_022076.2	dual specificity phosphatase 21 (DUSP21)	DUSP21	FALSE	FALSE	16.5748	151.863	51.5575	45.1689	22.8685	0.000585154	0.999999	5.14003e-05	9.16227	3.1106	2.72516	1.37972	2.9455	TRUE	FALSE	TRUE
BC062732.1	Ig kappa chain C region	IGKC	FALSE	FALSE	10.4496	95.7269	48.8631	28.4723	21.6734	0.171582	0.999999	0.273915	9.16086	4.67609	2.72474	2.0741	1.95908	FALSE	FALSE	FALSE
BC067132.1	WD repeat domain 23 (WDR23)	DCAF11	FALSE	FALSE	10.1361	92.8362	21.627	27.6125	9.59275	0.000235325	0.999999	0	9.15898	2.13367	2.72418	0.946397	4.2926	TRUE	FALSE	TRUE
BC046645.1	collagen and calcium binding EGF domains 1 (CCBE1)	CCBE1	FALSE	FALSE	5.42047	49.626	21.0511	14.7604	9.3373	0.000425826	0.870836	0.00723334	9.15528	3.88363	2.72308	1.7226	2.3574	TRUE	FALSE	TRUE
NM_002142.3	Homeobox protein Hox-A9	HOXA9	FALSE	FALSE	8.69007	79.5429	42.4645	23.6587	18.8353	0.252147	0.999999	0.177501	9.1533	4.88656	2.72249	2.16745	1.87316	FALSE	FALSE	FALSE
NM_005030.2	polo-like kinase 1 (Drosophila) (PLK1)	PLK1	FALSE	FALSE	10.3258	94.2579	40.0813	28.0354	17.7782	0.000150584	0.527964	0.00311139	9.12835	3.88165	2.71507	1.72172	2.35167	TRUE	FALSE	TRUE
NM_032636.2	proline/serine-rich coiled-coil 1 (PSRC1), transcript variant 1	PSRC1	FALSE	FALSE	63.957	583.608	336.247	173.584	149.144	0.00185823	0.667659	0.0808131	9.125	5.25739	2.71407	2.33194	1.73565	TRUE	FALSE	FALSE
BC006091.1	tumor suppressing subtransferable candidate 4 (TSSC4)	TSSC4	FALSE	FALSE	22.5874	205.784	135.31	61.2068	60.0171	0.00100115	0.501727	0.102116	9.11053	5.99048	2.70977	2.6571	1.52083	TRUE	FALSE	FALSE
BC030776.1	Intraflagellar transport protein 88 homolog	IFT88	FALSE	FALSE	1.79621	16.3415	14.1224	4.86051	6.26406	0.537446	0.999999	0.565821	9.09781	7.86237	2.70599	3.48739	1.15713	FALSE	FALSE	FALSE
NM_198467.1	round spermatid basic protein 1-like (RSBN1L)	RSBN1L	FALSE	FALSE	10.4272	94.7299	28.7328	28.1758	12.7445	0.000150584	0.999999	0	9.08488	2.75556	2.70214	1.22224	3.29692	TRUE	FALSE	TRUE
NM_175877.3	hypothetical protein MGC35023 (MGC35023)	LOC643406	FALSE	FALSE	1.3257	12.0428	13.2979	3.58193	5.89833	0.00756102	0.418654	0.569435	9.08412	10.0308	2.70191	4.44921	0.90562	TRUE	FALSE	FALSE
BC012368.1	angiopoietin-like 2 (ANGPTL2)	ANGPTL2	FALSE	FALSE	5.60907	50.8281	14.7545	15.1179	6.54439	0.00146125	0.999999	5.14003e-05	9.06177	2.63046	2.69527	1.16675	3.44493	TRUE	FALSE	TRUE
NM_001312.2	cysteine-rich protein 2 (CRIP2)	CRIP2	TRUE	FALSE	5.81129	52.6075	23.4598	15.6472	10.4057	0.000150584	0.587961	0.00271424	9.05263	4.03694	2.69255	1.7906	2.24245	TRUE	FALSE	TRUE
BC001001.2	vacuolar protein sorting 8 homolog (S. cerevisiae) (VPS8)	VPS8	FALSE	FALSE	16.1601	146.285	77.2741	43.51	34.2752	0.000235325	0.581095	0.0128206	9.05226	4.78179	2.69244	2.12098	1.89307	TRUE	FALSE	FALSE
NM_001190942	TRAIL Recombinant Human Protein	TNFSF10	FALSE	FALSE	2.88711	26.1093	4.83458	7.76575	2.1444	0.000189025	0.999999	0	9.04339	1.67454	2.6898	0.742749	5.40052	TRUE	FALSE	TRUE
BC066938.1	DEAD (Asp-Glu-Ala-Asp) box polypeptide 43 (DDX43)	DDX43	FALSE	FALSE	13.5245	122.276	64.8648	36.369	28.771	0.014849	0.875459	0.123958	9.04109	4.79609	2.68912	2.12733	1.88509	TRUE	FALSE	FALSE
NM_012131.1	Claudin-17	CLDN17	FALSE	FALSE	4.89421	44.1609	13.4127	13.1349	5.94926	0.0043118	0.999999	0.00395125	9.02309	2.74052	2.68376	1.21557	3.29247	TRUE	FALSE	TRUE
NM_020744.2	metastasis associated 1 family, member 3 (MTA3)	MTA3	FALSE	FALSE	4.07603	36.7136	6.08994	10.9198	2.70121	0.00205919	0.999999	0	9.00719	1.49408	2.67903	0.662707	6.02857	TRUE	FALSE	TRUE
BC016992.1	Programmed cell death protein 7	PDCD7	FALSE	FALSE	9.1987	82.8528	48.9472	24.6431	21.7107	0.0219148	0.889007	0.102116	9.00701	5.3211	2.67898	2.36019	1.6927	TRUE	FALSE	FALSE
BC016295.1	eukaryotic translation initiation factor 4A, isoform 2 (EIF4A2)	EIF4A2	FALSE	FALSE	5.36866	48.2974	14.9539	14.3652	6.63284	0.0301145	0.999999	0.0205643	8.99617	2.7854	2.67576	1.23547	3.22976	TRUE	FALSE	TRUE
NM_016310.2	polymerase (RNA) III (DNA directed) polypeptide K, 12.3 kDa (POLR3K)	POLR3K	FALSE	FALSE	12.5193	112.48	50.6822	33.4554	22.4803	0.00193274	0.606203	0.0935868	8.98453	4.04831	2.67229	1.79564	2.21933	TRUE	FALSE	FALSE
BC062437.1	Cytochrome c oxidase subunit IV isoform 1, mRNA (cDNA clone MGC:72016 IMAGE:6451700), complete cds	COX4I1	FALSE	FALSE	5.46754	49.0784	8.72999	14.5975	3.87222	0.000334054	0.999999	0	8.97633	1.5967	2.66985	0.70822	5.62181	TRUE	FALSE	TRUE
NM_016464.1	transmembrane protein 138 (TMEM138)	TMEM138	FALSE	FALSE	19.4643	174.564	93.9171	51.9212	41.6573	0.325324	0.902567	0.559326	8.96846	4.82511	2.66751	2.14019	1.85871	FALSE	FALSE	FALSE
BC030214.1	symplekin (SYMPK)	SYMPK	FALSE	FALSE	17.4781	156.578	86.5739	46.5716	38.4002	0.00235523	0.730932	0.0318313	8.95854	4.95327	2.66456	2.19704	1.80861	TRUE	FALSE	FALSE
BC053646.1	eukaryotic translation initiation factor 2B, subunit 5 epsilon, 82kDa (EIF2B5)	EIF2B5	FALSE	FALSE	34.5241	309.158	185.4	91.9538	82.2349	0.00428886	0.709526	0.092837	8.95485	5.37016	2.66346	2.38195	1.66752	TRUE	FALSE	FALSE
NM_020390.3	eukaryotic translation initiation factor 5A2 (EIF5A2)	EIF5A2	FALSE	FALSE	7.27949	65.0809	32.9929	19.3572	14.6341	0.0244703	0.848045	0.165925	8.94031	4.53231	2.65914	2.01032	1.97257	TRUE	FALSE	FALSE
BC003376.1	ELAV (embryonic lethal, abnormal vision, Drosophila)-like 1 (Hu antigen R) (ELAVL1)	ELAVL1	FALSE	FALSE	4.85855	43.424	13.2414	12.9157	5.87326	0.00178728	0.999999	0.000389467	8.93764	2.72538	2.65835	1.20885	3.27941	TRUE	FALSE	TRUE
BC017200.1	Calpain 1, (mu/I) large subunit, clone MGC:3970 IMAGE:3629894, mRNA, complete cds	CAPN1	FALSE	FALSE	4.85641	43.3577	10.7849	12.896	4.7837	0.00335338	0.999999	0.00032916	8.92792	2.22076	2.65546	0.985028	4.02021	TRUE	FALSE	TRUE
NM_022048.1	casein kinase 1, gamma 1 (CSNK1G1)	CSNK1G1	FALSE	FALSE	8.58805	76.5169	20.2459	22.7586	8.98015	0.000558266	0.999999	0.00032916	8.9097	2.35745	2.65004	1.04566	3.77938	TRUE	FALSE	TRUE
BC018906.2	B-cell linker, mRNA (cDNA clone MGC:10542 IMAGE:4053894), complete cds	BLNK	FALSE	FALSE	15.794	140.634	54.3078	41.8292	24.0884	0.00114986	0.999999	0.00151224	8.90425	3.4385	2.64841	1.52516	2.58957	TRUE	FALSE	TRUE
NM_016466.4	ankyrin repeat domain 39 (ANKRD39)	ANKRD39	FALSE	FALSE	8.47568	75.4234	36.059	22.4334	15.9941	0.131505	0.999999	0.443011	8.8988	4.25441	2.6468	1.88706	2.09167	FALSE	FALSE	FALSE
BC068555.1	Rho GTPase activating protein 26 (ARHGAP26)	ARHGAP26	FALSE	FALSE	17.0217	151.4	71.1264	45.0314	31.5484	0.00531591	0.999999	0.0317562	8.89454	4.17857	2.64553	1.85342	2.12861	TRUE	FALSE	TRUE
NM_014547.3	Tropomodulin-3	TMOD3	FALSE	FALSE	14.2682	126.802	61.5077	37.7151	27.282	0.00596286	0.74739	0.128135	8.88705	4.31083	2.6433	1.91208	2.06156	TRUE	FALSE	FALSE
BC027617.1	poly(A) binding protein, cytoplasmic 3 (PABPC3)	PABPC3	FALSE	FALSE	3.72071	33.0441	9.83752	9.8284	4.36347	0.00146125	0.999999	0.000252772	8.88113	2.64399	2.64154	1.17275	3.35899	TRUE	FALSE	TRUE
NM_005511.1	Melanoma antigen recognized by T-cells 1	MLANA	FALSE	FALSE	16.4259	145.787	31.1274	43.3617	13.8067	0.0412267	0.999999	0.00796934	8.87542	1.89502	2.63984	0.840543	4.68355	TRUE	FALSE	TRUE
NM_016205.1	platelet derived growth factor C (PDGFC), mRNA.	PDGFC	FALSE	FALSE	4.31324	38.2775	11.1661	11.385	4.95276	0.00223559	0.999999	0.000729028	8.87442	2.5888	2.63954	1.14827	3.42801	TRUE	FALSE	TRUE
NM_133443.1	glutamic pyruvate transaminase (alanine aminotransferase) 2 (GPT2)	GPT2	FALSE	FALSE	63.56	562.091	288.651	167.184	128.032	0.00415995	0.667659	0.152643	8.84347	4.5414	2.63034	2.01435	1.9473	TRUE	FALSE	FALSE
NM_014667.1	vestigial like 4 (Drosophila) (VGLL4)	VGLL4	FALSE	FALSE	28.8739	254.74	111.536	75.7682	49.4723	0.0551385	0.999999	0.263254	8.82251	3.86287	2.6241	1.71339	2.28392	FALSE	FALSE	FALSE
NM_001001325.1	Putative serine protease inhibitor Kazal-type 5-like 2	SPINK14	FALSE	FALSE	8.12633	71.6318	18.5644	21.3056	8.23433	0.00146125	0.999999	0	8.81477	2.28448	2.6218	1.01329	3.85855	TRUE	FALSE	TRUE
BC067735.1	hypothetical protein DKFZp761B107 (DKFZp761B107)	CCDC149	FALSE	FALSE	9.15335	80.6202	30.0825	23.9791	13.3432	0.000235325	0.892456	0.00032916	8.80772	3.2865	2.6197	1.45774	2.67997	TRUE	FALSE	TRUE
NM_006914.2	RAR-related orphan receptor B (RORB)	RORB	FALSE	FALSE	8.11491	71.4394	45.7278	21.2484	20.2827	0.014578	0.554503	0.429241	8.80348	5.63504	2.61844	2.49944	1.56228	TRUE	FALSE	FALSE
BC008435.1	peroxiredoxin 3 (PRDX3)	PRDX3	FALSE	FALSE	31.964	281.133	107.652	83.6181	47.7496	0.264115	0.999999	0.411622	8.79529	3.36792	2.61601	1.49385	2.61149	FALSE	FALSE	FALSE
BC007524.1	sperm associated antigen 9 (SPAG9)	SPAG9	FALSE	FALSE	7.12243	62.4564	21.6324	18.5766	9.59513	0.000301558	0.999999	0	8.76897	3.03722	2.60818	1.34717	2.88717	TRUE	FALSE	TRUE
NM_004196.2	Cyclin-dependent kinase-like 1	CDKL1	FALSE	FALSE	9.29776	81.5252	37.3896	24.2483	16.5843	0.0617959	0.999999	0.171333	8.76826	4.02135	2.60797	1.78369	2.18043	FALSE	FALSE	FALSE
NM_031483.3	E3 ubiquitin-protein ligase Itchy homolog	ITCH	FALSE	FALSE	27.158	237.832	208.127	70.7391	92.3154	0.0472485	0.606203	0.52766	8.75735	7.66356	2.60472	3.3992	1.14273	TRUE	FALSE	FALSE
NM_030938.2	transmembrane protein 49 (TMEM49)	VMP1	FALSE	FALSE	1.65748	14.4719	10.0446	4.30443	4.45534	0.202767	0.999999	0.448388	8.73127	6.06018	2.59697	2.68802	1.44076	FALSE	FALSE	FALSE
NM_007030.1	tubulin polymerization promoting protein (TPPP)	TPPP	TRUE	TRUE	26.0227	226.782	54.198	67.4524	24.0397	0.00221626	0.999999	0.00145647	8.7148	2.08272	2.59207	0.9238	4.18433	TRUE	FALSE	TRUE
NM_013323.1	sorting nexin 11 (SNX11), transcript variant 2	SNX11	FALSE	FALSE	12.7902	111.452	52.8436	33.1495	23.439	0.00886889	0.818854	0.0511863	8.71384	4.13156	2.59178	1.83257	2.1091	TRUE	FALSE	FALSE
NM_130848.1	chromosome 5 open reading frame 20 (C5orf20)	DCANP1	FALSE	FALSE	11.313	98.5239	38.3152	29.3042	16.9949	0.00199865	0.890587	0.0107406	8.70888	3.38682	2.59031	1.50224	2.5714	TRUE	FALSE	TRUE
NM_198395.1	GTPase activating protein (SH3 domain) binding protein 1 (G3BP1), transcript variant 2	G3BP1	TRUE	FALSE	10.8991	94.8977	32.7199	28.2257	14.513	0.00081995	0.999999	0.00340712	8.70691	3.00206	2.58972	1.33158	2.90031	TRUE	FALSE	TRUE
BC047720.1	lipoxygenase homology domains 1 (LOXHD1)	LOXHD1	FALSE	FALSE	6.37074	55.4476	14.2444	16.4919	6.31814	0.000986695	0.999999	5.14003e-05	8.70348	2.2359	2.5887	0.991742	3.89261	TRUE	FALSE	TRUE
NM_175883.2	Hypothetical protein FLJ38149 (FLJ38149), mRNA	HMSD	FALSE	FALSE	2.85231	24.8198	5.97083	7.38222	2.64838	0.00277085	0.999999	5.14003e-05	8.70164	2.09333	2.58815	0.928504	4.15684	TRUE	FALSE	TRUE
NM_032846.2	RAB2B, member RAS oncogene family (RAB2B)	RAB2B	FALSE	FALSE	21.3667	185.814	100.707	55.2671	44.6688	0.0138702	0.834511	0.0807286	8.69641	4.71325	2.5866	2.09058	1.8451	TRUE	FALSE	FALSE
NM_005842.2	sprouty homolog 2 (Drosophila) (SPRY2)	SPRY2	TRUE	FALSE	10.1753	88.478	19.8199	26.3163	8.79117	0.0031898	0.999999	0.000321757	8.69538	1.94784	2.58629	0.863973	4.46411	TRUE	FALSE	TRUE
NM_012341.2	GTP binding protein 4 (GTPBP4), mRNA	GTPBP4	FALSE	FALSE	7.1153	61.7185	25.0152	18.3571	11.0956	0.00738099	0.766906	0.0606237	8.67405	3.51569	2.57995	1.5594	2.46724	TRUE	FALSE	FALSE
NM_017850.1	Uncharacterized protein C1orf109	C1orf109	FALSE	FALSE	1.09084	9.45824	2.42934	2.81319	1.07754	0.0446919	0.999999	0.00951206	8.67063	2.22704	2.57893	0.987814	3.89333	TRUE	FALSE	TRUE
NP_068576.1	ACE2 / ACEH Protein	ACE2	FALSE	FALSE	1.72561	14.9419	6.82746	4.44421	3.02835	0.0385356	0.999999	0.137736	8.6589	3.95654	2.57544	1.75494	2.1885	TRUE	FALSE	FALSE
NM_000222.1	v-kit Hardy-Zuckerman 4 feline sarcoma viral oncogene homolog (KIT), transcript variant 1; see catalog number for detailed information on wild-type or point mutant status	KIT	FALSE	FALSE	16.2232	140.426	48.4754	41.7673	21.5015	0.00193274	0.999999	0.00206613	8.65591	2.98804	2.57455	1.32536	2.89685	TRUE	FALSE	TRUE
BC059387.1	Myosin IA, mRNA (cDNA clone MGC:71694 IMAGE:30341497), complete cds	MYO1A	FALSE	FALSE	5.43479	46.9807	13.1734	13.9736	5.8431	0.00278569	0.999999	0.00230645	8.64444	2.4239	2.57114	1.07513	3.56633	TRUE	FALSE	TRUE
BC013768.1	propionyl Coenzyme A carboxylase, beta polypeptide (PCCB)	PCCB	FALSE	FALSE	3.90464	33.741	9.16582	10.0357	4.06553	0.00470746	0.999999	5.14003e-05	8.64124	2.34741	2.57019	1.0412	3.68118	TRUE	FALSE	TRUE
BC000623.1	transmembrane protein 103 (TMEM103)	ELP6	FALSE	FALSE	4.26228	36.8201	12.0073	10.9515	5.32587	0.000213382	0.999999	5.14003e-05	8.6386	2.8171	2.5694	1.24954	3.06649	TRUE	FALSE	TRUE
NP_055154.3	IL17RA / CD217 Protein (His Tag)	IL17RA	FALSE	FALSE	1.55282	13.3913	5.67971	3.98301	2.51926	0.326036	0.999999	0.132809	8.62388	3.65769	2.56502	1.62238	2.35774	FALSE	FALSE	FALSE
NM_178275.3	eEF1A2 binding protein (DKFZp434B1231)	IGFN1	FALSE	FALSE	16.5013	142.301	49.3076	42.3251	21.8705	0.000662666	0.990817	0.00156762	8.62363	2.9881	2.56495	1.32538	2.886	TRUE	FALSE	TRUE
BC012766.1	endoplasmic reticulum-golgi intermediate compartment (ERGIC) 1 (ERGIC1)	ERGIC1	FALSE	FALSE	6.46138	55.7197	14.2487	16.5729	6.32005	0.00180234	0.999999	0.000321757	8.6235	2.20521	2.56491	0.978128	3.91051	TRUE	FALSE	TRUE
NM_001008237.1	tetratricopeptide repeat domain 32 (TTC32)	TTC32	FALSE	FALSE	8.47663	73.0212	22.9982	21.7189	10.2009	0.0374157	0.999999	0.00363656	8.61441	2.71313	2.56221	1.20342	3.17508	TRUE	FALSE	TRUE
NM_013431.1	killer cell lectin-like receptor subfamily C, member 4 (KLRC4)	KLRC4	FALSE	FALSE	23.8778	205.671	153.361	61.1732	68.0237	0.00561947	0.527964	0.256353	8.61348	6.42274	2.56193	2.84883	1.34109	TRUE	FALSE	FALSE
NM_016848.2	SHC-transforming protein 3	SHC3	FALSE	FALSE	19.8573	170.959	122.97	50.8487	54.5439	0.00238931	0.501727	0.284033	8.60935	6.19269	2.5607	2.74679	1.39024	TRUE	FALSE	FALSE
BC047438.1	Homer protein homolog 1	HOMER1	TRUE	FALSE	8.73178	75.0902	39.5763	22.3343	17.5542	0.0829569	0.753	0.482889	8.59965	4.53245	2.55782	2.01038	1.89735	FALSE	FALSE	FALSE
BC015944.1	TIA1 cytotoxic granule-associated RNA binding protein (TIA1)	TIA1	FALSE	FALSE	12.4378	106.959	43.9311	31.813	19.4858	0.0337184	0.999999	0.168294	8.59948	3.53206	2.55777	1.56666	2.43469	TRUE	FALSE	FALSE
BC007811.2	hypothetical protein FLJ22795 (FLJ22795)	GOLGA2P7	FALSE	FALSE	1.51523	13.0242	2.71114	3.87381	1.20254	0.0357562	0.999999	0.00216963	8.59551	1.78926	2.55659	0.793634	4.80394	TRUE	FALSE	TRUE
NM_032028.2	testis-specific serine kinase 1B (TSSK1B)	TSSK1B	FALSE	FALSE	16.5341	142.079	34.3772	42.2591	15.2482	0.000150584	0.999999	0	8.5931	2.07917	2.55587	0.922223	4.13295	TRUE	FALSE	TRUE
XM_085833.5	PREDICTED: Homo sapiens hypothetical protein LOC147646 (LOC147646), mRNA.	C19orf84	FALSE	FALSE	10.7748	92.35	34.6308	27.4679	15.3606	0.0605366	0.999999	0.0362248	8.57094	3.21406	2.54928	1.42561	2.6667	FALSE	FALSE	FALSE
BC017016.1	Lck-interacting transmembrane adapter 1	LIME1	FALSE	FALSE	7.78085	66.5997	23.8571	19.8089	10.5819	0.000425826	0.999999	0.000100095	8.55943	3.06613	2.54586	1.35999	2.79161	TRUE	FALSE	TRUE
NM_020317.2	chromosome 1 open reading frame 63 (C1orf63)	RSRP1	FALSE	FALSE	43.4312	371.63	190.091	110.535	84.3154	0.543683	0.999999	0.355926	8.55674	4.37682	2.54505	1.94135	1.95501	FALSE	FALSE	FALSE
NM_004466.3	glypican 5 (GPC5)	GPC5	FALSE	FALSE	4.85602	41.5444	11.0438	12.3567	4.89852	0.00180234	0.999999	5.14003e-05	8.55525	2.27425	2.54461	1.00875	3.76179	TRUE	FALSE	TRUE
NM_170603.1	RAS guanyl-releasing protein 4	RASGRP4	FALSE	FALSE	11.5706	98.871	58.6532	29.4075	26.0159	0.00217569	0.419318	0.183125	8.54501	5.06915	2.54157	2.24844	1.68569	TRUE	FALSE	FALSE
BC011924.1	unkempt homolog (Drosophila)-like (UNKL)	UNKL	TRUE	FALSE	12.488	106.709	40.2063	31.7388	17.8337	0.00180234	0.654944	0.0485808	8.54493	3.2196	2.54154	1.42806	2.65404	TRUE	FALSE	TRUE
BC052614.1	Fls485, mRNA (cDNA clone MGC:59771 IMAGE:6300057), complete cds	SSUH2	FALSE	FALSE	3.1681	27.039	6.76116	8.0423	2.99894	0.00186393	0.999999	5.14003e-05	8.53477	2.13413	2.53852	0.946603	3.99917	TRUE	FALSE	TRUE
NM_052926.1	Paraneoplastic antigen-like protein 5	PNMA5	FALSE	FALSE	16.5732	141.321	55.5463	42.0335	24.6378	0.00265355	0.999999	0.00470438	8.52705	3.35157	2.53622	1.4866	2.5442	TRUE	FALSE	TRUE
NM_178496.2	chromosome 3 open reading frame 59 (C3orf59)	MB21D2	FALSE	FALSE	7.44476	63.4361	25.5824	18.868	11.3472	0.0206605	0.935543	0.181566	8.5209	3.4363	2.53439	1.52418	2.47967	TRUE	FALSE	FALSE
BC058287.1	angiopoietin-like 3 (ANGPTL3)	ANGPTL3	FALSE	FALSE	3.45745	29.4598	7.75625	8.76232	3.44031	0.00169728	0.999999	5.14003e-05	8.52069	2.24335	2.53433	0.995044	3.79821	TRUE	FALSE	TRUE
NM_199163.2	WAS protein family homolog 1	WASH3P	FALSE	FALSE	11.0747	94.3067	35.9444	28.0499	15.9433	0.391151	0.999999	0.268824	8.5155	3.24563	2.53279	1.43961	2.62368	FALSE	FALSE	FALSE
NM_178152.1	Neuronal migration protein doublecortin	DCX	FALSE	FALSE	16.8989	143.869	66.0454	42.7913	29.2947	0.00696395	0.902567	0.0198988	8.5135	3.90827	2.53219	1.73353	2.17833	TRUE	FALSE	TRUE
NP_059112.1	IL1R9 / IL1RAPL2 / IL1 Receptor 9 Protein (His Tag)	IL1RAPL2	FALSE	FALSE	1.94686	16.5726	12.2598	4.92922	5.4379	0.139214	0.999999	0.380398	8.51246	6.29724	2.53188	2.79316	1.35178	FALSE	FALSE	FALSE
BC061519.1	cDNA clone MGC:70561 IMAGE:6193636, complete cds	VIT	FALSE	FALSE	3.80256	32.3088	9.39157	9.60968	4.16567	0.00452949	0.999999	0.000321757	8.49658	2.4698	2.52716	1.09549	3.44019	TRUE	FALSE	TRUE
NP_005067.1	CNTN2 / Contactin-2 Protein (His Tag)	CNTN2	FALSE	FALSE	1.2571	10.6723	4.46526	3.1743	1.98058	0.00235523	0.944666	0.0163894	8.48963	3.55202	2.52509	1.57551	2.39008	TRUE	FALSE	TRUE
NM_144769.1	forkhead box I1 (FOXI1), transcript variant 2	FOXI1	FALSE	FALSE	9.77402	82.9708	25.4316	24.6782	11.2803	0.00259185	0.999999	0.000895213	8.48891	2.60196	2.52488	1.15411	3.2625	TRUE	FALSE	TRUE
BC100879.2	Gamma-crystallin N	CRYGN	FALSE	FALSE	12.8851	109.312	47.2059	32.5128	20.9384	0.215353	0.999999	0.124233	8.48357	3.6636	2.52329	1.625	2.31563	FALSE	FALSE	FALSE
NM_022915.2	mitochondrial ribosomal protein L44 (MRPL44), nuclear gene encoding mitochondrial protein	MRPL44	FALSE	FALSE	6.65403	56.4478	19.8207	16.7894	8.79157	0.133321	0.999999	0.0321837	8.48325	2.97876	2.5232	1.32124	2.84791	FALSE	FALSE	FALSE
NM_018431.3	Docking protein 5	DOK5	FALSE	FALSE	3.4871	29.5718	8.04328	8.79562	3.56763	0.0030349	0.999999	0.00125746	8.48033	2.30658	2.52233	1.02309	3.67659	TRUE	FALSE	TRUE
NM_007173.3	protease, serine, 23 (PRSS23)	PRSS23	FALSE	FALSE	4.98384	42.1911	11.4179	12.549	5.06446	0.00940568	0.999999	0.00512337	8.46558	2.29099	2.51794	1.01618	3.69517	TRUE	FALSE	TRUE
NM_145061.1	chromosome 13 open reading frame 3 (C13orf3)	SKA3	FALSE	FALSE	26.2198	221.753	163.003	65.9567	72.3004	0.000425826	0.295942	0.151019	8.45747	6.21677	2.51553	2.75747	1.36043	TRUE	FALSE	FALSE
NM_017634.1	BTB/POZ domain-containing protein KCTD9	KCTD9	FALSE	FALSE	10.7092	90.5665	45.4767	26.9374	20.1714	0.0214328	0.613967	0.349675	8.45691	4.24652	2.51536	1.88356	1.99149	TRUE	FALSE	FALSE
BC036422.1	hypothetical protein MGC42105 (MGC42105)	NIM1K	FALSE	FALSE	1.34056	11.3277	19.8316	3.36924	8.79637	0.19134	0.563353	0.470273	8.44998	14.7935	2.5133	6.56169	0.571197	FALSE	FALSE	FALSE
NM_000788.1	Deoxycytidine kinase	DCK	FALSE	FALSE	7.70657	65.0998	35.5066	19.3628	15.7491	0.132162	0.999999	0.387699	8.44732	4.60732	2.51251	2.04359	1.83345	FALSE	FALSE	FALSE
NM_153345.1	transmembrane protein 139 (TMEM139)	TMEM139	FALSE	FALSE	13.1367	110.919	83.7774	32.9909	37.1598	0.0119527	0.597651	0.284033	8.44341	6.37734	2.51135	2.82869	1.32397	TRUE	FALSE	FALSE
NP_055747.1	VWC2 / Brorin Protein (His Tag)	VWC2	FALSE	FALSE	2.06767	17.437	16.9458	5.18633	7.51638	0.0489357	0.680163	0.426409	8.43316	8.19561	2.5083	3.63519	1.02898	TRUE	FALSE	FALSE
BC008305.1	Uncharacterized protein C18orf8	C18orf8	FALSE	FALSE	5.21791	43.9892	12.6408	13.0838	5.60689	0.000268035	0.999999	0	8.43043	2.42259	2.50749	1.07455	3.47993	TRUE	FALSE	TRUE
NM_000245.2	met proto-oncogene (hepatocyte growth factor receptor) (MET); see catalog number for detailed information on wild-type or point mutant status	MET	FALSE	FALSE	6.70762	56.4526	22.3708	16.7908	9.92266	0.000213382	0.788666	0.00075001	8.41619	3.33514	2.50325	1.47931	2.52349	TRUE	FALSE	TRUE
BC067431.1	Cytochrome P450 2B6	CYP2B6	FALSE	FALSE	4.48456	37.7183	11.9859	11.2187	5.3164	0.00589085	0.999999	0.00230645	8.4107	2.67271	2.50162	1.18549	3.14688	TRUE	FALSE	TRUE
NM_015981.1	calcium/calmodulin-dependent protein kinase (CaM kinase) II alpha (CAMK2A), transcript variant 1	CAMK2A	TRUE	TRUE	5.41959	45.5532	16.6031	13.549	7.36438	0.00238362	0.999999	0.00151224	8.40527	3.06354	2.5	1.35884	2.74365	TRUE	FALSE	TRUE
NM_000141.2	fibroblast growth factor receptor 2 (bacteria-expressed kinase, keratinocyte growth factor receptor, craniofacial dysostosis 1, Crouzon syndrome, Pfeiffer syndrome, Jackson-Weiss syndrome) (FGFR2), transcript variant 1	FGFR2	FALSE	FALSE	11.3213	95.0105	70.251	28.2592	31.1601	0.00128423	0.325934	0.261176	8.39221	6.20522	2.49612	2.75235	1.35244	TRUE	FALSE	FALSE
NM_032207.1	Uncharacterized protein C19orf44	C19orf44	FALSE	FALSE	25.2298	211.176	126.21	62.8107	55.981	0.00285528	0.636024	0.0797952	8.37009	5.00242	2.48954	2.21884	1.67321	TRUE	FALSE	FALSE
BC011710.2	Putative HIF-prolyl hydroxylase PH-4	P4HTM	FALSE	FALSE	8.8995	74.4717	19.266	22.1503	8.54549	0.00759931	0.999999	0.00233274	8.36808	2.16484	2.48894	0.960221	3.86545	TRUE	FALSE	TRUE
NM_152721.2	Docking protein 6	DOK6	FALSE	FALSE	4.31965	36.142	20.2308	10.7498	8.97344	0.00217569	0.595824	0.0918749	8.36689	4.68344	2.48859	2.07736	1.78648	TRUE	FALSE	FALSE
NM_016059.3	peptidylprolyl isomerase (cyclophilin)-like 1 (PPIL1)	PPIL1	FALSE	FALSE	12.5276	104.802	42.6287	31.1715	18.9081	0.000585154	0.999999	0.000220409	8.36569	3.40279	2.48823	1.50932	2.45848	TRUE	FALSE	TRUE
NM_178226.1	F-box/WD repeat-containing protein 5	FBXW5	FALSE	FALSE	4.21027	35.1708	10.102	10.4609	4.48079	0.00119319	0.999999	0.000100095	8.35357	2.39938	2.48463	1.06425	3.48156	TRUE	FALSE	TRUE
NM_030881.2	DEAD (Asp-Glu-Ala-Asp) box polypeptide 17 (DDX17), transcript variant 2	DDX17	FALSE	TRUE	16.7173	139.532	73.3355	41.5013	32.5282	0.0412453	0.895634	0.273448	8.34656	4.38681	2.48254	1.94579	1.90265	TRUE	FALSE	FALSE
NM_024316.1	leukocyte receptor cluster (LRC) member 1 (LENG1)	LENG1	FALSE	FALSE	12.1846	101.696	39.1971	30.2478	17.386	0.00996601	0.999999	0.0415628	8.34633	3.21695	2.48247	1.42689	2.59449	TRUE	FALSE	TRUE
NM_005335.3	Hematopoietic lineage cell-specific protein	HCLS1	FALSE	FALSE	28.7672	239.946	129.221	71.3678	57.3164	0.00157024	0.613774	0.0344377	8.34097	4.49196	2.48088	1.99242	1.85687	TRUE	FALSE	FALSE
BC017440.1	trafficking protein particle complex 2-like (TRAPPC2L)	TRAPPC2L	FALSE	FALSE	14.5597	121.312	39.3536	36.0821	17.4555	0.134806	0.999999	0.136817	8.33201	2.70291	2.47821	1.19888	3.08261	FALSE	FALSE	FALSE
NP_056295.1	PVRL3 / CD113 Protein (His Tag)	PRR3	FALSE	FALSE	1.15416	9.61147	5.0246	2.85877	2.22868	0.0138122	0.999999	0.0107664	8.32764	4.35346	2.47691	1.93099	1.91288	TRUE	FALSE	FALSE
BC010935.1	casein kappa (CSN3)	CSN3	FALSE	FALSE	13.7202	114.228	40.4871	33.9752	17.9582	0.010559	0.999999	0.00338656	8.32556	2.95091	2.47629	1.30889	2.82135	TRUE	FALSE	TRUE
NM_182943.2	Procollagen-lysine,2-oxoglutarate 5-dioxygenase 2	PLOD2	FALSE	FALSE	3.56517	29.6617	8.41629	8.82236	3.73308	0.00180234	0.999999	0	8.31985	2.3607	2.47459	1.0471	3.52432	TRUE	FALSE	TRUE
NM_000758	GM-CSF Recombinant Human Protein	CSF2	FALSE	FALSE	5.27563	43.8823	15.1972	13.052	6.74078	0.0200848	0.999999	0.00759898	8.31793	2.88065	2.47402	1.27772	2.88752	TRUE	FALSE	TRUE
NM_005163.1	RAC-alpha serine/threonine-protein kinase	AKT1	TRUE	FALSE	12.2254	101.573	45.1152	30.2112	20.011	0.00180234	0.921264	0.00571828	8.30836	3.69029	2.47118	1.63684	2.25141	TRUE	FALSE	TRUE
BC008374.1	SH3 domain containing, Ysc84-like 1 (S. cerevisiae) (SH3YL1)	SH3YL1	FALSE	FALSE	9.13944	75.7843	29.9621	22.5407	13.2898	0.00247022	0.999999	0.0134042	8.29201	3.27833	2.46632	1.45411	2.52934	TRUE	FALSE	TRUE
NP_001120645.1	CADM3 / NECL1 / IGSF4B Protein (His Tag)	CADM3	FALSE	FALSE	2.02702	16.7953	5.965	4.99547	2.6458	0.411845	0.999999	0.386867	8.28572	2.94274	2.46444	1.30526	2.81564	FALSE	FALSE	FALSE
NM_181349.1	SMAD specific E3 ubiquitin protein ligase 1 (SMURF1), transcript variant 2	SMURF1	FALSE	FALSE	10.31	85.421	36.8811	25.407	16.3588	0.0122043	0.891772	0.124698	8.28525	3.57722	2.46431	1.58669	2.31612	TRUE	FALSE	FALSE
NM_153337.1	selectin ligand interactor cytoplasmic-1 (SLIC1), transcript variant 1	SNX20	FALSE	FALSE	6.22385	51.4644	21.2421	15.3072	9.42201	0.00197994	0.999999	0.00708655	8.26891	3.41302	2.45945	1.51386	2.42276	TRUE	FALSE	TRUE
NM_005872.1	breast carcinoma amplified sequence 2 (BCAS2)	BCAS2	FALSE	FALSE	5.4458	45.0155	14.6924	13.3891	6.51687	0.0417629	0.999999	0.00169308	8.2661	2.69793	2.45861	1.19668	3.06386	TRUE	FALSE	TRUE
BC016652.1	Cytoplasmic tyrosine-protein kinase BMX	BMX	FALSE	FALSE	7.84621	64.8519	32.6697	19.2891	14.4907	0.00190852	0.999999	0.00758904	8.26538	4.16375	2.4584	1.84685	1.98508	TRUE	FALSE	FALSE
NM_024093.1	chromosome 2 open reading frame 49 (C2orf49)	C2orf49	FALSE	FALSE	26.7483	221.066	101.902	65.7522	45.1989	0.000497648	0.703838	0.0116547	8.26468	3.80966	2.45819	1.68979	2.1694	TRUE	FALSE	TRUE
BC052995.2	SAPS domain family, member 2 (SAPS2)	PPP6R2	FALSE	TRUE	44.5702	368.344	178.308	109.558	79.0892	0.0106592	0.818854	0.0929885	8.26435	4.00061	2.45809	1.77448	2.06578	TRUE	FALSE	FALSE
NM_006775.1	quaking homolog, KH domain RNA binding (mouse) (QKI), transcript variant 1	QKI	FALSE	TRUE	21.8433	180.363	59.4912	53.6459	26.3875	0.00235523	0.999999	0.000321757	8.25713	2.72354	2.45594	1.20804	3.03176	TRUE	FALSE	TRUE
NM_001007232.1	Caspase-1 inhibitor INCA	CARD17	FALSE	FALSE	8.87349	73.2659	39.6893	21.7917	17.6043	0.41893	0.999999	0.43153	8.25671	4.47279	2.45582	1.98392	1.84599	FALSE	FALSE	FALSE
BC007742.1	exosome component 5 (EXOSC5)	EXOSC5	FALSE	FALSE	11.5635	95.4548	35.2257	28.3914	15.6245	0.0321619	0.999999	0.028012	8.25481	3.04628	2.45525	1.35119	2.7098	TRUE	FALSE	TRUE
NM_015417.2	sperm flagellar 1 (SPEF1)	SPEF1	FALSE	FALSE	10.6369	87.6926	39.3372	26.0827	17.4481	0.0592936	0.999999	0.171663	8.24416	3.69817	2.45208	1.64034	2.22926	FALSE	FALSE	FALSE
NM_058190.2	Chromosome 21 open reading frame 70 (C21orf70), mRNA	FAM207A	FALSE	FALSE	2.62922	21.6583	5.54682	6.44189	2.46031	0.00306972	0.999999	5.14003e-05	8.23752	2.10968	2.45011	0.935756	3.90463	TRUE	FALSE	TRUE
NM_173509.2	UPF0417 protein FAM163A	FAM163A	FALSE	FALSE	19.1724	157.888	139.476	46.9611	61.8649	0.0126907	0.470835	0.508807	8.23519	7.27483	2.44942	3.22678	1.13201	TRUE	FALSE	FALSE
NM_016483.3	PHD finger protein 7 (PHF7), transcript variant 1	PHF7	FALSE	FALSE	7.43826	61.2005	20.3157	18.203	9.01112	0.00576109	0.999999	0.0105223	8.2278	2.73125	2.44722	1.21145	3.01247	TRUE	FALSE	TRUE
NM_001156.2	annexin A7 (ANXA7), transcript variant 1	ANXA7	FALSE	FALSE	44.6807	367.448	168.307	109.291	74.6534	0.0195915	0.999999	0.0260648	8.22387	3.76689	2.44605	1.67082	2.1832	TRUE	FALSE	TRUE
BC020747.1	serpin peptidase inhibitor, clade A (alpha-1 antiproteinase, antitrypsin), member 7 (SERPINA7)	SERPINA7	FALSE	FALSE	2.06108	16.9488	10.658	5.04112	4.72738	0.182576	0.999999	0.387057	8.22324	5.17105	2.44586	2.29364	1.59025	FALSE	FALSE	FALSE
NM_015696.2	glutathione peroxidase 7 (GPX7)	GPX7	FALSE	FALSE	4.96007	40.7497	10.292	12.1203	4.56505	0.000334054	0.999999	0	8.21555	2.07497	2.44357	0.92036	3.95936	TRUE	FALSE	TRUE
NM_183382.1	ring finger protein 13 (RNF13), transcript variant 2	RNF13	FALSE	TRUE	21.7319	178.484	88.619	53.0869	39.3073	0.00185823	0.848045	0.00989442	8.213	4.07784	2.44282	1.80874	2.01406	TRUE	FALSE	TRUE
NM_017772.2	TBC1 domain family member 22B	TBC1D22B	FALSE	FALSE	14.0618	115.466	78.2891	34.3434	34.7254	0.00185823	0.254867	0.373922	8.2113	5.56749	2.44231	2.46948	1.47487	TRUE	FALSE	FALSE
BC031682.1	RNA-binding protein 42	RBM42	FALSE	FALSE	12.4593	102.201	39.3723	30.3981	17.4637	0.00581594	0.999999	0.00787964	8.20285	3.16008	2.43979	1.40167	2.59577	TRUE	FALSE	TRUE
NM_006931.1	solute carrier family 2 (facilitated glucose transporter), member 3 (SLC2A3)	SLC2A3	FALSE	FALSE	6.31864	51.8152	13.3767	15.4115	5.93331	0.00495142	0.999999	0.00032916	8.20036	2.11703	2.43906	0.939016	3.87352	TRUE	FALSE	TRUE
NP_002294.2	Leptin Receptor / LEPR / CD295 Protein (His Tag)	LEPR	FALSE	FALSE	1.45356	11.9085	7.25015	3.54199	3.21583	0.0214146	0.778633	0.198383	8.19269	4.98786	2.43677	2.21239	1.64252	TRUE	FALSE	FALSE
BC010081.2	mannosidase, alpha, class 2C, member 1 (MAN2C1)	MAN2C1	FALSE	FALSE	11.3058	92.1351	37.7326	27.404	16.7364	0.0602989	0.999999	0.119706	8.14939	3.33747	2.4239	1.48035	2.44179	FALSE	FALSE	FALSE
BC033167.1	calcium binding protein 4 (CABP4)	CABP4	FALSE	FALSE	5.99973	48.8119	24.6969	14.5183	10.9544	0.0138471	0.766906	0.160352	8.13569	4.11633	2.41982	1.82581	1.97644	TRUE	FALSE	FALSE
NM_198173.1	grainyhead-like 3 (Drosophila) (GRHL3), transcript variant 2	GRHL3	FALSE	FALSE	10.3814	84.4326	47.2674	25.113	20.9656	0.0267273	0.658464	0.325406	8.13309	4.5531	2.41905	2.01954	1.78627	TRUE	FALSE	FALSE
NM_000181.1	glucuronidase, beta (GUSB)	GUSB	FALSE	FALSE	4.01618	32.646	8.44626	9.71	3.74637	0.0010829	0.999999	0	8.12863	2.10306	2.41772	0.932819	3.86515	TRUE	FALSE	TRUE
NM_014840.2	NUAK family, SNF1-like kinase, 1 (NUAK1)	NUAK1	FALSE	FALSE	16.3573	132.881	43.2153	39.5232	19.1683	0.00193274	0.999999	0.00292357	8.12366	2.64196	2.41624	1.17185	3.07486	TRUE	FALSE	TRUE
NM_016535.1	zinc finger protein 581 (ZNF581)	ZNF581	FALSE	FALSE	1.40093	11.3662	10.6963	3.38069	4.74436	0.0399372	0.766781	0.387017	8.11335	7.63511	2.41318	3.38658	1.06264	TRUE	FALSE	FALSE
NM_000415.1	islet amyloid polypeptide (IAPP)	IAPP	FALSE	FALSE	5.82925	47.2839	19.661	14.0638	8.7207	0.0462106	0.999999	0.061374	8.11149	3.37282	2.41262	1.49603	2.40496	TRUE	FALSE	FALSE
BC031231.1	serine/threonine kinase 33 (STK33)	STK33	FALSE	FALSE	11.3824	92.2949	52.1675	27.4515	23.1391	0.0349946	0.816422	0.237098	8.10853	4.58315	2.41174	2.03287	1.7692	TRUE	FALSE	FALSE
NM_032294.2	Calcium/calmodulin-dependent protein kinase kinase 1	CAMKK1	FALSE	FALSE	4.05068	32.8432	15.3651	9.76865	6.81524	0.00192787	0.801569	0.0131561	8.10808	3.79321	2.41161	1.68249	2.13752	TRUE	FALSE	TRUE
BC040559.1	Lymphoid enhancer-binding factor 1, mRNA (cDNA clone MGC:41818 IMAGE:5269696), complete cds	LEF1	FALSE	FALSE	4.00991	32.4179	7.78885	9.64214	3.45478	0.00209586	0.999999	0	8.08443	1.9424	2.40458	0.861559	4.16209	TRUE	FALSE	TRUE
NM_153339.1	pseudouridylate synthase-like 1 (PUSL1)	PUSL1	FALSE	FALSE	5.72982	46.2879	15.3883	13.7675	6.82553	0.00076642	0.999999	0.00032916	8.07841	2.68565	2.40278	1.19123	3.00799	TRUE	FALSE	TRUE
NP_002323.2	LRP1 / A2MR / CD91 (aa 786-1165) Protein	LRP1	FALSE	FALSE	3.27258	26.4139	23.4804	7.85637	10.4148	0.0190226	0.680163	0.267516	8.07128	7.17489	2.40066	3.18245	1.12494	TRUE	FALSE	FALSE
NM_174942.1	GAS2-like protein 3	GAS2L3	FALSE	FALSE	16.0682	129.684	50.1907	38.5724	22.2623	0.00763404	0.999999	0.0180165	8.07088	3.12361	2.40054	1.38549	2.58383	TRUE	FALSE	TRUE
BC012124.1	cancer susceptibility candidate 4 (CASC4)	CASC4	FALSE	FALSE	6.00685	48.4366	17.5034	14.4066	7.76371	0.00180234	0.999999	0.00123578	8.06356	2.91391	2.39837	1.29248	2.76726	TRUE	FALSE	TRUE
NM_001280.1	cold inducible RNA binding protein (CIRBP)	CIRBP	FALSE	FALSE	5.87579	47.379	15.2999	14.0921	6.78632	0.000150584	0.999999	5.14003e-05	8.06342	2.60389	2.39833	1.15496	3.09669	TRUE	FALSE	TRUE
BC012131.1	chromosome 14 open reading frame 149 (C14orf149)	L3HYPDH	FALSE	FALSE	9.69047	78.0558	52.3744	23.2164	23.2308	0.0131326	0.414124	0.517281	8.05491	5.40473	2.39579	2.39729	1.49034	TRUE	FALSE	FALSE
BC051733.1	Leucine zipper protein 1, mRNA (cDNA clone MGC:51018 IMAGE:4838475), complete cds	LUZP1	TRUE	TRUE	13.4026	107.921	41.4786	32.0991	18.398	0.000558266	0.999999	0.000321757	8.05221	3.09482	2.39499	1.37272	2.60184	TRUE	FALSE	TRUE
BC000177.2	DnaJ (Hsp40) homolog, subfamily B, member 6 (DNAJB6)	DNAJB6	FALSE	FALSE	2.25791	18.143	8.17782	5.39631	3.6273	0.612991	0.999999	0.362389	8.03527	3.62185	2.38995	1.60648	2.21856	FALSE	FALSE	FALSE
NM_001123366.1	PREDICTED	OR1N2	FALSE	FALSE	3.9681	31.8117	9.79721	9.46183	4.34559	0.00196593	0.999999	0.000220409	8.01685	2.46899	2.38447	1.09513	3.24701	TRUE	FALSE	TRUE
NM_181714.1	Leber congenital amaurosis 5 (LCA5)	LCA5	FALSE	FALSE	9.67056	77.4962	22.8059	23.0499	10.1157	0.0578756	0.999999	0.00946399	8.01362	2.35828	2.38351	1.04603	3.39807	FALSE	FALSE	FALSE
NM_014045.3	low density lipoprotein receptor-related protein 10 (LRP10)	LRP10	FALSE	FALSE	6.11987	48.9972	16.5812	14.5734	7.35465	0.00047588	0.999999	5.14003e-05	8.00624	2.7094	2.38132	1.20177	2.95498	TRUE	FALSE	TRUE
NM_002748.2	mitogen-activated protein kinase 6 (MAPK6)	MAPK6	FALSE	FALSE	6.91479	55.3403	22.559	16.46	10.0061	0.0518311	0.999999	0.195545	8.00319	3.26243	2.38041	1.44706	2.45314	FALSE	FALSE	FALSE
NM_013302.1	eukaryotic elongation factor-2 kinase	EEF2K	FALSE	FALSE	6.01587	48.1416	22.0393	14.3189	9.7756	0.00460526	0.875459	0.0368496	8.00243	3.66352	2.38019	1.62497	2.18435	TRUE	FALSE	TRUE
BC039711.1	centrosomal protein 57kDa (CEP57)	CEP57	FALSE	FALSE	19.1087	152.909	84.0065	45.4801	37.2614	0.00147187	0.613774	0.0303296	8.00207	4.39625	2.38008	1.94997	1.8202	TRUE	FALSE	FALSE
BC060814.1	centaurin, gamma 2 (CENTG2)	AGAP1	FALSE	FALSE	2.4837	19.8649	14.992	5.90846	6.64976	0.465149	0.999999	0.495553	7.99809	6.03615	2.37889	2.67736	1.32503	FALSE	FALSE	FALSE
NM_145169.1	SFT2 domain containing 1 (SFT2D1)	SFT2D1	FALSE	FALSE	3.29333	26.3322	7.3366	7.83207	3.25418	0.00169728	0.999999	5.14003e-05	7.99562	2.22771	2.37816	0.988111	3.58916	TRUE	FALSE	TRUE
NM_033439	IL33 Recombinant Human Protein	IL33	FALSE	FALSE	5.81207	46.4565	7.36795	13.8177	3.26808	0.0387599	0.999999	0.000918116	7.99311	1.2677	2.37741	0.562293	6.30521	TRUE	FALSE	TRUE
BC060786.1	development and differentiation enhancing factor-like 1 (DDEFL1)	ASAP3	FALSE	FALSE	15.6099	124.677	58.9916	37.0829	26.1659	0.00891558	0.999999	0.0232618	7.987	3.7791	2.37559	1.67624	2.11346	TRUE	FALSE	TRUE
BC040981.2	hypothetical protein FLJ30934 (FLJ30934)	SNX32	FALSE	FALSE	6.30267	50.3316	17.3704	14.9703	7.70472	0.00120743	0.999999	0.000252772	7.98576	2.75604	2.37523	1.22245	2.89755	TRUE	FALSE	TRUE
NM_177524.1	mesoderm specific transcript homolog (mouse) (MEST), transcript variant 2	MEST	FALSE	FALSE	8.76151	69.8644	26.2935	20.7799	11.6626	0.00561947	0.999999	0.0089968	7.97401	3.00102	2.37173	1.33111	2.6571	TRUE	FALSE	TRUE
BC011875.2	cDNA clone IMAGE:3161837, partial cds	ELAVL3	FALSE	FALSE	10.0655	80.1312	24.0658	23.8336	10.6745	0.00351923	0.999999	0.00230645	7.96101	2.39093	2.36787	1.0605	3.32968	TRUE	FALSE	TRUE
BC044567.1	pleckstrin homology domain containing, family A (phosphoinositide binding specific) member 3 (PLEKHA3)	PLEKHA3	FALSE	FALSE	12.0829	96.1547	46.704	28.5996	20.7157	0.00120743	0.875459	0.00538595	7.95795	3.86531	2.36695	1.71447	2.05881	TRUE	FALSE	TRUE
BC092473.1	Porcine endogenous retrovirus A receptor 2	SLC52A1	FALSE	FALSE	5.28093	42.0192	14.9772	12.4979	6.6432	0.00417077	0.999999	0.00549786	7.95678	2.8361	2.36661	1.25796	2.80554	TRUE	FALSE	TRUE
BC069675.1	Motilin, mRNA (cDNA clone MGC:97389 IMAGE:7262661), complete cds	MLN	FALSE	FALSE	6.7395	53.5332	29.8143	15.9225	13.2242	0.000213382	0.581095	0.00599134	7.9432	4.42381	2.36257	1.9622	1.79556	TRUE	FALSE	FALSE
NM_001001974.1	pleckstrin homology domain containing, family A (phosphoinositide binding specific) member 1 (PLEKHA1), transcript variant 2	PLEKHA1	FALSE	FALSE	27.3328	216.939	114.922	64.5249	50.9739	0.00047588	0.485633	0.0141931	7.93696	4.20453	2.36071	1.86494	1.88772	TRUE	FALSE	FALSE
NM_006698.1	bladder cancer associated protein (BLCAP)	BLCAP	FALSE	FALSE	7.73946	61.4067	26.4699	18.2643	11.7408	0.0167527	0.999999	0.043691	7.93423	3.42012	2.3599	1.51701	2.31987	TRUE	FALSE	TRUE
NM_021639.2	GC-rich promoter binding protein 1-like 1 (GPBP1L1)	GPBP1L1	FALSE	FALSE	39.1138	309.588	122.343	92.0815	54.2658	0.0607628	0.999999	0.0523673	7.91506	3.12788	2.3542	1.38738	2.53049	FALSE	FALSE	FALSE
BC036572.2	zinc finger, CCHC domain containing 12 (ZCCHC12)	ZCCHC12	FALSE	FALSE	5.94996	47.0891	16.4254	14.0058	7.28556	0.00180234	0.999999	0.00303802	7.91418	2.76059	2.35393	1.22447	2.86684	TRUE	FALSE	TRUE
BC004410.1	Zinc finger protein castor homolog 1	CASZ1	FALSE	FALSE	20.0233	158.306	29.6875	47.0854	13.168	0.113903	0.999999	0.000895213	7.90608	1.48265	2.35153	0.657633	5.33241	FALSE	FALSE	FALSE
NM_199169.1	Transmembrane, prostate androgen induced RNA (TMEPAI), transcript variant 2, mRNA	PMEPA1	FALSE	FALSE	27.9663	221.04	86.9904	65.7445	38.5849	0.262796	0.999999	0.137592	7.90381	3.11055	2.35085	1.37969	2.54097	FALSE	FALSE	FALSE
NM_199054.1	MAP kinase interacting serine/threonine kinase 2 (MKNK2), transcript variant 2	MKNK2	FALSE	FALSE	12.4139	98.097	46.1801	29.1773	20.4834	0.012067	0.763419	0.2059	7.90217	3.72003	2.35037	1.65003	2.12423	TRUE	FALSE	FALSE
NM_138771.1	Coiled-coil domain-containing protein 126	CCDC126	FALSE	FALSE	22.0444	173.833	61.8096	51.7036	27.4159	0.00047588	0.999999	5.14003e-05	7.88559	2.80387	2.34543	1.24366	2.8124	TRUE	FALSE	TRUE
BC024243.2	Regulator of microtubule dynamics protein 2	RMDN2	FALSE	FALSE	6.77417	53.397	17.5909	15.882	7.80249	0.00295278	0.999999	0.0039128	7.88243	2.59675	2.34449	1.1518	3.0355	TRUE	FALSE	TRUE
NM_005533.2	interferon-induced protein 35 (IFI35)	IFI35	FALSE	FALSE	13.6525	107.513	38.43	31.978	17.0458	0.00622182	0.999999	0.0164544	7.87499	2.81486	2.34228	1.24854	2.79764	TRUE	FALSE	TRUE
NM_001561.3	tumor necrosis factor receptor superfamily, member 9 (TNFRSF9)	TNFRSF9	FALSE	FALSE	4.89351	38.5028	21.3229	11.452	9.45787	0.130942	0.999999	0.228458	7.86813	4.35739	2.34024	1.93274	1.8057	FALSE	FALSE	FALSE
BC039317.1	coiled-coil domain containing 65 (CCDC65)	CCDC65	FALSE	FALSE	2.16947	17.0636	3.64447	5.07528	1.61652	0.269548	0.999999	0.0211946	7.86533	1.67988	2.33941	0.745119	4.68206	FALSE	FALSE	FALSE
NM_148904.2	oxysterol binding protein-like 9 (OSBPL9), transcript variant 1	OSBPL9	FALSE	FALSE	20.4871	161.022	77.2782	47.8934	34.277	0.0190226	0.766906	0.135782	7.8597	3.77204	2.33773	1.6731	2.08367	TRUE	FALSE	FALSE
NM_198440.2	Der1-like domain family, member 3 (DERL3), transcript variant 1, mRNA	DERL3	FALSE	FALSE	3.6795	28.7807	7.29312	8.56032	3.23489	0.00169728	0.999999	0	7.8219	1.98209	2.32649	0.879165	3.94628	TRUE	FALSE	TRUE
BC007709.1	Protein phosphatase Slingshot homolog 3	SSH3	FALSE	FALSE	6.09095	47.632	41.3698	14.1673	18.3497	0.0390786	0.606203	0.498018	7.82014	6.79201	2.32596	3.01262	1.15137	TRUE	FALSE	FALSE
BC006124.1	IMP (inosine monophosphate) dehydrogenase 2 (IMPDH2)	IMPDH2	FALSE	FALSE	9.66987	75.6024	53.0002	22.4866	23.5085	0.00500405	0.473218	0.323755	7.81834	5.48096	2.32543	2.4311	1.42645	TRUE	FALSE	FALSE
NM_014239.1	eukaryotic translation initiation factor 2B, subunit 2 beta, 39kDa (EIF2B2)	EIF2B2	FALSE	FALSE	9.47843	74.0015	27.8451	22.0105	12.3508	0.243333	0.999999	0.120928	7.80736	2.93773	2.32216	1.30304	2.65761	FALSE	FALSE	FALSE
BC050622.1	receptor accessory protein 4 (REEP4)	REEP4	FALSE	FALSE	5.5716	43.4215	13.8931	12.915	6.16233	0.00235523	0.999999	0.000220409	7.79337	2.49356	2.318	1.10603	3.1254	TRUE	FALSE	TRUE
BC050683.1	zinc finger protein 410 (ZNF410)	ZNF410	FALSE	FALSE	9.7095	75.6344	33.7084	22.4962	14.9515	0.00934423	0.999999	0.0205678	7.78973	3.47169	2.31692	1.53988	2.24378	TRUE	FALSE	TRUE
NP_002341	LYN A Recombinant Human Protein	LYN	FALSE	FALSE	24.05	187.335	11.7404	55.7197	5.20749	0.00209586	0.999999	0	7.78942	0.488166	2.31683	0.216528	15.9565	TRUE	FALSE	TRUE
NM_003211.1	thymine-DNA glycosylase (TDG)	TDG	FALSE	FALSE	5.57568	43.3674	16.0775	12.8989	7.13125	0.00476229	0.999999	0.00417419	7.77796	2.88351	2.31342	1.27899	2.69739	TRUE	FALSE	TRUE
NM_133640.3	Mediator of RNA polymerase II transcription subunit 22	MED22	FALSE	FALSE	17.5073	136.13	91.8869	40.4895	40.7568	0.0260183	0.9949	0.169788	7.7756	5.24849	2.31272	2.32799	1.48149	TRUE	FALSE	FALSE
NM_178169.2	Ras association (RalGDS/AF-6) domain family 3 (RASSF3)	RASSF3	FALSE	FALSE	10.9796	85.3496	34.391	25.3858	15.2542	0.0645395	0.999999	0.205508	7.77347	3.13226	2.31208	1.38933	2.48174	FALSE	FALSE	FALSE
NM_030575.1	hypothetical protein MGC10334 (MGC10334)	CPTP	FALSE	FALSE	30.9276	240.366	132.169	71.4927	58.624	0.00190852	0.613967	0.0253811	7.77189	4.27349	2.31161	1.89552	1.81863	TRUE	FALSE	FALSE
NM_004465	FGF10 Recombinant Human Protein	FGF10	FALSE	FALSE	2.45502	19.0764	3.68834	5.67394	1.63598	0.0201666	0.999999	0.00123775	7.77036	1.50237	2.31116	0.66638	5.17208	TRUE	FALSE	TRUE
NM_174896.2	chromosome 1 open reading frame 162 (C1orf162)	C1orf162	FALSE	FALSE	17.2952	134.282	69.9647	39.94	31.0331	0.00397438	0.818854	0.0622639	7.76412	4.04532	2.3093	1.79431	1.91929	TRUE	FALSE	FALSE
NM_013352.1	Squamous cell carcinoma antigen recognized by T cells 2 (SART2), mRNA	DSE	FALSE	FALSE	3.40214	26.3997	4.79105	7.85215	2.12509	0.00576109	0.999999	5.14003e-05	7.75976	1.40825	2.30801	0.624634	5.51022	TRUE	FALSE	TRUE
NM_012215.1	Bifunctional protein NCOAT	MGEA5	TRUE	FALSE	18.9117	146.71	68.5366	43.6363	30.3997	0.00147187	0.680373	0.0168361	7.7576	3.62402	2.30736	1.60745	2.1406	TRUE	FALSE	TRUE
NM_003975.1	SH2 domain protein 2A (SH2D2A)	SH2D2A	FALSE	FALSE	23.3442	180.921	83.0298	53.8118	36.8282	0.00711279	0.999999	0.0257808	7.75016	3.55677	2.30515	1.57762	2.17899	TRUE	FALSE	TRUE
NM_005565.2	lymphocyte cytosolic protein 2 (SH2 domain containing leukocyte protein of 76kDa) (LCP2)	LCP2	FALSE	FALSE	36.1909	279.919	97.1485	83.257	43.0906	0.0065737	0.999999	0.00988115	7.73452	2.68434	2.3005	1.19065	2.88135	TRUE	FALSE	TRUE
NM_005375.2	v-myb myeloblastosis viral oncogene homolog (avian) (MYB)	MYB	TRUE	FALSE	5.66349	43.7731	17.2089	13.0195	7.63307	0.0148366	0.999999	0.00547474	7.72899	3.03857	2.29886	1.34777	2.54363	TRUE	FALSE	TRUE
NM_014764.1	DAZ-associated protein 2	DAZAP2	FALSE	FALSE	17.2175	132.878	45.3119	39.5223	20.0983	0.0195915	0.999999	0.00759898	7.7176	2.63173	2.29547	1.16732	2.93252	TRUE	FALSE	TRUE
NM_003674.2	cyclin-dependent kinase (CDC2-like) 10 (CDK10), transcript variant 1	CDK10	FALSE	FALSE	6.21742	47.9648	21.7766	14.2663	9.65911	0.0205685	0.999999	0.0898516	7.71458	3.50252	2.29457	1.55356	2.20258	TRUE	FALSE	FALSE
BC007766.1	transmembrane channel-like 6 (TMC6)	TMC6	FALSE	FALSE	6.13964	47.3494	17.1327	14.0832	7.59926	0.0124794	0.999999	0.0134042	7.71207	2.7905	2.29382	1.23774	2.76369	TRUE	FALSE	TRUE
NM_006449.2	CDC42 effector protein (Rho GTPase binding) 3 (CDC42EP3)	CDC42EP3	FALSE	FALSE	34.9217	269.201	115.901	80.0693	51.4082	0.020445	0.945476	0.114644	7.70871	3.31888	2.29282	1.4721	2.32269	TRUE	FALSE	FALSE
BC030811.1	Kruppel-like factor 4 (gut) (KLF4)	KLF4	FALSE	FALSE	11.2382	86.6187	54.2231	25.7632	24.0509	0.0138702	0.902567	0.0460528	7.70749	4.82487	2.29246	2.14009	1.59745	TRUE	FALSE	FALSE
NM_002370.2	mago-nashi homolog, proliferation-associated (Drosophila) (MAGOH)	MAGOH	FALSE	FALSE	6.15043	47.3897	14.722	14.0952	6.53001	0.0209372	0.999999	0.0173204	7.7051	2.39366	2.29175	1.06172	3.21896	TRUE	FALSE	TRUE
BC031549.1	CDC-like kinase 1 (CLK1)	CLK1	FALSE	FALSE	6.91277	53.2602	25.3931	15.8413	11.2632	0.00578515	0.865038	0.0429387	7.70462	3.67337	2.29161	1.62933	2.09743	TRUE	FALSE	TRUE
BC021988.1	Nedd4 family interacting protein 2 (NDFIP2)	NDFIP2	FALSE	FALSE	18.9253	145.792	79.7872	43.3632	35.3899	0.0139259	0.753	0.150533	7.70352	4.2159	2.29128	1.86998	1.82726	TRUE	FALSE	FALSE
NP_000221.1	Leptin Protein (Native)	LEP	FALSE	FALSE	2.96824	22.8366	6.11725	6.79235	2.71333	0.0592936	0.999999	0.0147578	7.69365	2.0609	2.28834	0.914119	3.73315	FALSE	FALSE	FALSE
NM_025106.2	splA/ryanodine receptor domain and SOCS box containing 1 (SPSB1)	SPSB1	FALSE	FALSE	11.0405	84.905	32.5162	25.2535	14.4227	0.00135626	0.999999	0.00176898	7.6903	2.94517	2.28735	1.30634	2.61116	TRUE	FALSE	TRUE
NM_156036.1	Homeobox protein Hox-B6	HOXB6	FALSE	FALSE	26.8218	206.197	116.61	61.3297	51.7228	0.0248473	0.753	0.269087	7.68766	4.34759	2.28656	1.92839	1.76826	TRUE	FALSE	FALSE
BC006117.1	Chromosome 14 open reading frame 160, mRNA (cDNA clone MGC:12994 IMAGE:3504996), complete cds	L2HGDH	FALSE	FALSE	3.04089	23.3607	5.87381	6.94823	2.60535	0.00180234	0.999999	0	7.68218	1.93161	2.28493	0.856771	3.97709	TRUE	FALSE	TRUE
BC007206.1	Src homology 2 domain containing transforming protein D (SHD)	SHD	FALSE	FALSE	4.46586	34.3076	10.7725	10.2042	4.77817	0.121709	0.999999	0.0381096	7.68218	2.41218	2.28493	1.06993	3.18474	FALSE	FALSE	FALSE
BC031052.1	TNF receptor-associated factor 6 (TRAF6)	TRAF6	FALSE	FALSE	4.31305	33.1199	10.518	9.85093	4.66528	0.00751022	0.999999	0.000668819	7.67899	2.43864	2.28398	1.08167	3.14889	TRUE	FALSE	TRUE
NM_004456.2	Polycomb protein EZH2	EZH2	TRUE	FALSE	9.11871	69.9886	21.8711	20.8169	9.70101	0.00661709	0.999999	0.0039128	7.67527	2.39849	2.28288	1.06386	3.20005	TRUE	FALSE	TRUE
NM_020646.1	achaete-scute complex homolog 3 (Drosophila) (ASCL3)	ASCL3	FALSE	FALSE	13.6945	105.061	49.8681	31.2486	22.1192	0.0177438	0.999999	0.054713	7.67179	3.64148	2.28184	1.61519	2.10678	TRUE	FALSE	FALSE
BC041157.1	thromboxane A synthase 1 (platelet, cytochrome P450, family 5, subfamily A) (TBXAS1)	TBXAS1	FALSE	FALSE	7.44013	57.0727	15.5563	16.9753	6.90006	0.00500405	0.999999	0.000826508	7.67093	2.09087	2.28159	0.927411	3.66878	TRUE	FALSE	TRUE
NM_004669.2	chloride intracellular channel 3 (CLIC3)	CLIC3	FALSE	FALSE	16.6456	127.568	38.2483	37.9429	16.9652	0.096817	0.999999	0.00887875	7.66375	2.2978	2.27945	1.0192	3.33526	FALSE	FALSE	FALSE
NM_006805.2	heterogeneous nuclear ribonucleoprotein A0 (HNRNPA0)	HNRNPA0	FALSE	TRUE	3.80718	29.1711	8.7613	8.67644	3.88611	0.0122952	0.999999	0.00329872	7.66213	2.30126	2.27897	1.02073	3.32954	TRUE	FALSE	TRUE
BC006005.1	unconventional SNARE in the ER 1 homolog (S. cerevisiae) (USE1)	USE1	FALSE	FALSE	12.2968	94.184	63.7972	28.0134	28.2975	0.305664	0.999999	0.509015	7.65923	5.18812	2.27811	2.30121	1.4763	FALSE	FALSE	FALSE
NM_006790.1	myotilin (MYOT)	MYOT	FALSE	FALSE	24.2563	185.782	71.2254	55.2577	31.5923	0.00360871	0.831938	0.0301958	7.65913	2.93637	2.27808	1.30244	2.60837	TRUE	FALSE	TRUE
NM_003215.1	tec protein tyrosine kinase (TEC)	TEC	FALSE	FALSE	12.0744	92.4231	38.1165	27.4897	16.9067	0.0275234	0.999999	0.0109704	7.65448	3.1568	2.27669	1.40021	2.42476	TRUE	FALSE	TRUE
BC034692.1	anillin, actin binding protein (ANLN)	ANLN	FALSE	FALSE	9.8082	75.0767	44.6071	22.3303	19.7856	0.249936	0.999999	0.370504	7.65448	4.54794	2.27669	2.01725	1.68307	FALSE	FALSE	FALSE
NM_022822.1	kinesin light chain 2 (KLC2)	KLC2	FALSE	FALSE	13.5329	103.581	64.612	30.8083	28.6589	0.0255918	0.822959	0.155286	7.65403	4.77446	2.27656	2.11773	1.60312	TRUE	FALSE	FALSE
NM_001008218.1	amylase, alpha 1B (salivary) (AMY1B)	AMY1B	FALSE	FALSE	3.81784	29.2037	8.5382	8.68612	3.78715	0.00201726	0.999999	0	7.64926	2.23639	2.27514	0.991961	3.42035	TRUE	FALSE	TRUE
NM_018105.1	THAP domain containing, apoptosis associated protein 1 (THAP1), transcript variant 1	THAP1	FALSE	FALSE	6.41183	48.9839	18.2784	14.5694	8.10744	0.00280047	0.999999	0.00552307	7.63962	2.85073	2.27227	1.26445	2.67988	TRUE	FALSE	TRUE
BC000082.1	Arsenite-resistance protein 2	SRRT	FALSE	FALSE	6.04913	46.2029	13.3221	13.7423	5.90907	0.00596286	0.999999	5.14003e-05	7.63794	2.20232	2.27177	0.976846	3.46814	TRUE	FALSE	TRUE
BC033178.1	immunoglobulin heavy constant gamma 3 (G3m marker) (IGHG3)	IGHG3	FALSE	FALSE	23.7629	181.495	62.0374	53.9826	27.5169	0.00047588	0.999999	5.14003e-05	7.63775	2.61069	2.27172	1.15798	2.92557	TRUE	FALSE	TRUE
BC007833.2	phosphatidylinositol-4-phosphate 5-kinase, type I, alpha (PIP5K1A)	PIP5K1A	FALSE	FALSE	6.49529	49.5918	24.153	14.7502	10.7132	0.00698481	0.762196	0.0858205	7.63504	3.71855	2.27091	1.64937	2.05323	TRUE	FALSE	FALSE
NM_173665.1	Uncharacterized protein C5orf36	KIAA0825	FALSE	FALSE	7.18202	54.7987	18.727	16.2989	8.30642	0.000601515	0.999999	5.14003e-05	7.62999	2.60748	2.26941	1.15656	2.92619	TRUE	FALSE	TRUE
BC011454.1	angiomotin like 2 (AMOTL2)	AMOTL2	FALSE	FALSE	49.2447	375.701	147.914	111.746	65.6077	0.00258192	0.999999	0.00258162	7.62928	3.00365	2.2692	1.33228	2.54	TRUE	FALSE	TRUE
ENST00000312345	Database:core Gene:ENSG00000174970 Clone:AP003033 Contig:AP003033.2.1.62192 Chr:11 Basepair:57248005 Status:known	OR10AG1	FALSE	FALSE	4.75188	36.2464	9.95391	10.7809	4.41509	0.00609405	0.999999	5.14003e-05	7.6278	2.09473	2.26876	0.929125	3.64142	TRUE	FALSE	TRUE
BC060813.1	AMME syndrome candidate gene 1 protein	AMMECR1	FALSE	FALSE	14.8507	113.262	57.2034	33.6878	25.3728	0.0284339	0.762832	0.240539	7.62672	3.85191	2.26844	1.70853	1.97999	TRUE	FALSE	FALSE
NM_133336.1	Wolf-Hirschhorn syndrome candidate 1 (WHSC1), transcript variant 9	WHSC1	FALSE	FALSE	5.74146	43.7125	17.1869	13.0015	7.62329	0.00463397	0.961135	0.0168422	7.61349	2.99346	2.2645	1.32776	2.54337	TRUE	FALSE	TRUE
BC030519.1	cryptochrome 1 (photolyase-like) (CRY1)	CRY1	FALSE	FALSE	3.06668	23.3471	8.79152	6.94418	3.89951	0.0359708	0.999999	0.0408136	7.61315	2.86679	2.2644	1.27157	2.65564	TRUE	FALSE	TRUE
NM_002613.3	3-phosphoinositide dependent protein kinase-1 (PDPK1), transcript variant 1	PDPK1	FALSE	FALSE	10.481	79.7632	39.7095	23.7242	17.6133	0.000711865	0.581095	0.0132299	7.61028	3.78872	2.26355	1.6805	2.00867	TRUE	FALSE	TRUE
BC004932.1	chromosome 16 open reading frame 30 (C16orf30)	TMEM204	FALSE	FALSE	7.58087	57.673	22.0744	17.1538	9.79118	0.00165847	0.999999	0.00187658	7.6077	2.91186	2.26278	1.29156	2.61266	TRUE	FALSE	TRUE
NM_003691.1	Serine/threonine-protein kinase 16	STK16	FALSE	FALSE	8.99089	68.3933	24.3238	20.3424	10.7889	0.0162833	0.999999	0.0223816	7.60695	2.70539	2.26256	1.19998	2.81178	TRUE	FALSE	TRUE
NM_000572	IL-10	IL10	FALSE	FALSE	1.98945	15.1328	5.65789	4.50098	2.50958	0.470888	0.999999	0.123859	7.60651	2.84395	2.26243	1.26145	2.67463	FALSE	FALSE	FALSE
BC006793.1	Trans-acting T-cell-specific transcription factor GATA-3	GATA3	FALSE	FALSE	5.38543	40.9629	15.0636	12.1837	6.68151	0.00171876	0.999999	0.000546161	7.60624	2.7971	2.26234	1.24066	2.71933	TRUE	FALSE	TRUE
NM_001011669.1	Coiled-coil-helix-coiled-coil-helix domain-containing protein 7	CHCHD7	FALSE	FALSE	8.59276	65.3068	20.4475	19.4244	9.06955	0.0028529	0.999999	5.14003e-05	7.60021	2.37961	2.26055	1.05549	3.19388	TRUE	FALSE	TRUE
NM_032021.2	AD031 protein (AD031), mRNA	TMEM133	FALSE	FALSE	7.48946	56.8406	16.1362	16.9063	7.15729	0.0114437	0.999999	5.14003e-05	7.58942	2.15453	2.25734	0.955648	3.52255	TRUE	FALSE	TRUE
BC006106.1	ribosomal protein S6 kinase, 70kDa, polypeptide 2 (RPS6KB2)	RPS6KB2	FALSE	FALSE	31.8631	241.376	157.742	71.7932	69.967	0.00047588	0.443848	0.0333753	7.57542	4.95062	2.25318	2.19586	1.5302	TRUE	FALSE	FALSE
BC003383.1	transcription factor B2, mitochondrial (TFB2M)	TFB2M	FALSE	FALSE	3.66279	27.7262	6.55443	8.24667	2.90724	0.00832116	0.999999	0	7.56968	1.78946	2.25147	0.793722	4.23015	TRUE	FALSE	TRUE
XM_071151.2	Similar to Olfactory receptor 1N2 (LOC138882), mRNA	OR7D2	FALSE	FALSE	4.95126	37.4405	11.5837	11.136	5.13798	0.00246514	0.999999	5.14003e-05	7.5618	2.33954	2.24913	1.03771	3.23218	TRUE	FALSE	TRUE
NM_032855.1	hematopoietic SH2 domain containing (HSH2D)	HSH2D	FALSE	FALSE	15.8905	120.161	68.4728	35.7398	30.3714	0.0433887	0.618243	0.436138	7.5618	4.30903	2.24913	1.91129	1.75487	TRUE	FALSE	FALSE
NM_018097.1	centrosomal protein 27kDa (CEP27)	HAUS2	FALSE	FALSE	4.56934	34.4934	8.98082	10.2595	3.98348	0.00147187	0.999999	5.14003e-05	7.54886	1.96545	2.24528	0.871783	3.84078	TRUE	FALSE	TRUE
BC031079.1	CUG triplet repeat, RNA binding protein 1 (CUGBP1)	CELF1	FALSE	FALSE	26.7566	201.958	85.3288	60.069	37.8479	0.0200738	0.999999	0.00470438	7.54797	3.18907	2.24501	1.41453	2.36682	TRUE	FALSE	TRUE
NM_178552.2	chromosome 22 open reading frame 33 (C22orf33)	TEX33	FALSE	FALSE	11.4131	86.0964	53.2986	25.6079	23.6408	0.00306972	0.999999	0.0134499	7.54361	4.66993	2.24372	2.07136	1.61536	TRUE	FALSE	FALSE
BC028424.1	E3 ubiquitin-protein ligase rififylin	RFFL	FALSE	FALSE	7.91634	59.6014	29.1032	17.7274	12.9088	0.0235334	0.999999	0.11339	7.52891	3.67635	2.23934	1.63066	2.04793	TRUE	FALSE	FALSE
NM_005702.1	Era G-protein-like 1 (E. coli) (ERAL1)	ERAL1	FALSE	FALSE	1.42177	10.693	18.3255	3.18044	8.12835	0.188164	0.247275	0.167492	7.52091	12.8893	2.23696	5.71708	0.583502	FALSE	FALSE	FALSE
NM_018222.2	parvin, alpha (PARVA)	PARVA	FALSE	FALSE	9.24145	69.4719	22.3997	20.6632	9.93548	0.000711865	0.999999	5.14003e-05	7.51743	2.42383	2.23593	1.0751	3.10146	TRUE	FALSE	TRUE
BC002877.2	Metallophosphoesterase 1	MPPE1	FALSE	FALSE	7.22178	54.2531	17.3561	16.1366	7.69835	0.0161847	0.999999	0.00292357	7.51242	2.40329	2.23444	1.06599	3.12588	TRUE	FALSE	TRUE
BC067521.1	grainyhead-like 1 (Drosophila) (GRHL1)	GRHL1	FALSE	FALSE	8.86204	66.5158	24.0249	19.784	10.6563	0.00429932	0.999999	0.00177799	7.5057	2.71099	2.23244	1.20247	2.76862	TRUE	FALSE	TRUE
NM_170750.1	proteasome (prosome, macropain) 26S subunit, non-ATPase, 10 (PSMD10), transcript variant 2	PSMD10	FALSE	FALSE	8.75892	65.6359	27.6481	19.5222	12.2634	0.0543189	0.999999	0.0408136	7.4936	3.15656	2.22884	1.4001	2.37398	FALSE	FALSE	FALSE
NM_022903.2	Hypothetical protein FLJ12800 (FLJ12800), mRNA	CCDC71	FALSE	FALSE	3.94098	29.5264	6.74237	8.78212	2.99061	0.00114986	0.999999	0	7.49214	1.71084	2.22841	0.758848	4.37923	TRUE	FALSE	TRUE
NM_001004285.1	DNA fragmentation factor, 40kDa, beta polypeptide (caspase-activated DNase) (DFFB), transcript variant 3	DFFB	FALSE	FALSE	8.63607	64.6964	33.9173	19.2428	15.0441	0.171753	0.999999	0.342521	7.49142	3.9274	2.22819	1.74201	1.90748	FALSE	FALSE	FALSE
BC010360.1	LMBR1 domain containing 1 (LMBRD1)	LMBRD1	FALSE	FALSE	6.70928	50.2532	12.4586	14.9469	5.52605	0.00143112	0.999999	0	7.4901	1.85692	2.2278	0.823643	4.03362	TRUE	FALSE	TRUE
NM_144982.1	coiled-coil domain containing 131 (CCDC131)	ZFC3H1	FALSE	FALSE	39.6778	296.749	133.447	88.2629	59.191	0.0149262	0.999999	0.018729	7.47897	3.36327	2.22449	1.49179	2.22372	TRUE	FALSE	TRUE
NM_005435.2	Rho guanine nucleotide exchange factor (GEF) 5 (ARHGEF5)	ARHGEF5	FALSE	FALSE	12.5097	93.4857	50.0248	27.8057	22.1887	0.0461168	0.999999	0.115056	7.47307	3.99889	2.22273	1.77372	1.86879	TRUE	FALSE	FALSE
BC011792.1	enoyl Coenzyme A hydratase 1, peroxisomal (ECH1)	ECH1	FALSE	FALSE	4.6829	34.9768	20.4535	10.4032	9.07224	0.0167527	0.999999	0.023144	7.46904	4.36771	2.22154	1.93731	1.71006	TRUE	FALSE	FALSE
BC035494.2	origin recognition complex, subunit 3-like (yeast) (ORC3L)	ORC3	FALSE	FALSE	8.96571	66.9603	31.8856	19.9162	14.143	0.00180234	0.682937	0.0160533	7.46849	3.5564	2.22137	1.57745	2.10001	TRUE	FALSE	TRUE
BC028682.2	coiled-coil domain containing 91 (CCDC91)	CCDC91	FALSE	FALSE	15.2437	113.716	38.0226	33.8227	16.8651	0.135145	0.999999	0.0261171	7.45982	2.49431	2.2188	1.10636	2.99073	FALSE	FALSE	FALSE
BC000702.1	Mitochondrial carrier homolog 1	MTCH1	FALSE	FALSE	6.23827	46.5134	13.229	13.8346	5.86778	0.000497648	0.999999	0	7.45615	2.12063	2.2177	0.940611	3.51601	TRUE	FALSE	TRUE
NM_182522.2	family with sequence similarity 19 (chemokine (C-C motif)-like), member A4 (FAM19A4), transcript variant 1	FAM19A4	FALSE	FALSE	1.31732	9.8166	3.33852	2.91978	1.48081	0.0838593	0.999999	0.0226496	7.45194	2.53433	2.21645	1.12411	2.9404	FALSE	FALSE	FALSE
BC052805.1	erythrocyte membrane protein band 4.9 (dematin) (EPB49)	DMTN	TRUE	TRUE	45.8901	341.932	162.625	101.702	72.1329	0.00903971	0.875459	0.0628084	7.4511	3.54379	2.2162	1.57186	2.10258	TRUE	FALSE	FALSE
BC008840.2	Thrombospondin type-1 domain-containing protein 4	THSD4	FALSE	FALSE	5.93305	44.2044	15.9736	13.1478	7.08515	0.0132465	0.999999	0.0037188	7.45055	2.69231	2.21604	1.19418	2.76734	TRUE	FALSE	TRUE
NM_138717.1	palmitoyl-protein thioesterase 2 (PPT2), transcript variant 2	PPT2	FALSE	FALSE	5.89278	43.8998	13.7174	13.0572	6.0844	0.0272287	0.999999	0.0140721	7.44977	2.32783	2.2158	1.03252	3.20031	TRUE	FALSE	TRUE
BC050329.1	neuropilin (NRP) and tolloid (TLL)-like 1 (NETO1)	NETO1	FALSE	FALSE	11.2633	83.681	37.885	24.8895	16.804	0.0183793	0.999999	0.00725066	7.42955	3.36359	2.20979	1.49193	2.20882	TRUE	FALSE	TRUE
NM_002387.1	mutated in colorectal cancers (MCC), transcript variant 2	MCC	FALSE	FALSE	17.8227	132.277	78.4068	39.3434	34.7776	0.0551674	0.875459	0.269278	7.42179	4.39926	2.20748	1.95131	1.68706	FALSE	FALSE	FALSE
NP_000607.1	CD4 / LEU3 Protein	CD4	FALSE	FALSE	1.99526	14.8023	4.95632	4.4027	2.19839	0.0374157	0.999999	0.00363656	7.41875	2.48405	2.20658	1.10181	2.98655	TRUE	FALSE	TRUE
NM_020630.2	ret proto-oncogene (RET), transcript variant 4	RET	FALSE	FALSE	6.71394	49.7538	8.27926	14.7984	3.6723	0.0481276	0.999999	5.14003e-05	7.41052	1.23315	2.20413	0.546966	6.00944	TRUE	FALSE	TRUE
NM_006214.2	phytanoyl-CoA 2-hydroxylase (PHYH), transcript variant 1	PHYH	FALSE	FALSE	10.5993	78.5316	31.332	23.3579	13.8974	0.00459467	0.999999	0.00151224	7.40913	2.95604	2.20372	1.31116	2.50643	TRUE	FALSE	TRUE
NM_000605.2	interferon, alpha 2 (IFNA2)	IFNA2	FALSE	FALSE	10.8644	80.4869	40.998	23.9394	18.1848	0.13226	0.999999	0.386661	7.40832	3.77361	2.20348	1.6738	1.96319	FALSE	FALSE	FALSE
NM_015191.1	SNF1-like kinase 2 (SNF1LK2)	SIK2	FALSE	FALSE	16.5808	122.727	33.106	36.503	14.6843	0.00768754	0.999999	0.0031244	7.40175	1.99664	2.20152	0.885618	3.7071	TRUE	FALSE	TRUE
BC002374.1	karyopherin alpha 1 (importin alpha 5) (KPNA1)	KPNA1	FALSE	FALSE	7.04123	52.0782	27.2391	15.4897	12.082	0.145511	0.999999	0.238577	7.39618	3.86852	2.19986	1.7159	1.91189	FALSE	FALSE	FALSE
NP_005408	SRC Recombinant Human Protein	SRC	FALSE	FALSE	14.035	103.655	31.082	30.8304	13.7865	0.00952486	0.999999	0.00150426	7.38549	2.21461	2.19669	0.982298	3.3349	TRUE	FALSE	TRUE
BC011553.1	glutaminyl-peptide cyclotransferase-like (QPCTL)	QPCTL	FALSE	FALSE	4.40901	32.5623	8.81913	9.6851	3.91176	0.00143112	0.999999	5.14003e-05	7.3854	2.00025	2.19666	0.887218	3.69224	TRUE	FALSE	TRUE
NM_018135.2	mitochondrial ribosomal protein S18A (MRPS18A), nuclear gene encoding mitochondrial protein	MRPS18A	FALSE	FALSE	6.09872	45.0088	14.2042	13.3871	6.3003	0.00979061	0.999999	0.00530907	7.38005	2.32904	2.19507	1.03305	3.16871	TRUE	FALSE	TRUE
NM_018645.3	Transcription cofactor HES-6	HES6	FALSE	FALSE	40.0186	295.152	139.792	87.788	62.0051	0.139612	0.999999	0.063005	7.37538	3.49316	2.19368	1.54941	2.11138	FALSE	FALSE	FALSE
BC007080.1	transmembrane protein 14B (TMEM14B)	TMEM14B	FALSE	FALSE	11.2214	82.7407	39.3341	24.6098	17.4468	0.326036	0.999999	0.202898	7.37349	3.50528	2.19312	1.55478	2.10354	FALSE	FALSE	FALSE
BC052303.1	Rho GTPase activating protein 4 (ARHGAP4)	ARHGAP4	FALSE	TRUE	18.4449	135.677	95.5588	40.3549	42.3854	0.0260115	0.595824	0.474063	7.35582	5.18077	2.18786	2.29795	1.41983	TRUE	FALSE	FALSE
NM_182835.1	sec1 family domain containing 1 (SCFD1), transcript variant 2	SCFD1	FALSE	FALSE	6.92576	50.9304	16.575	15.1484	7.35189	0.0851055	0.999999	0.00177799	7.35377	2.39323	2.18725	1.06153	3.07273	FALSE	FALSE	FALSE
NM_054016.1	FUS interacting protein (serine/arginine-rich) 1 (FUSIP1), transcript variant 2	SRSF10	FALSE	FALSE	5.92633	43.5688	11.5877	12.9588	5.13978	0.0162147	0.999999	0.00217009	7.35173	1.9553	2.18664	0.867278	3.75991	TRUE	FALSE	TRUE
BC012888.1	Bifunctional heparan sulfate N-deacetylase/N-sulfotransferase 1	NDST1	FALSE	FALSE	5.30692	38.9865	12.5643	11.5959	5.57295	0.0120741	0.999999	0.00246166	7.34636	2.36753	2.18505	1.05013	3.10296	TRUE	FALSE	TRUE
NM_032837.1	family with sequence similarity 104, member A (FAM104A), transcript variant 2	FAM104A	FALSE	FALSE	10.1463	74.4697	33.5748	22.1497	14.8922	0.0382316	0.999999	0.126214	7.33956	3.30905	2.18303	1.46774	2.21802	TRUE	FALSE	FALSE
NM_006746.1	sex comb on midleg-like 1 (Drosophila) (SCML1), transcript variant 2	SCML1	FALSE	FALSE	12.5443	92.0429	53.4464	27.3766	23.7063	0.00727366	0.606203	0.0979662	7.3374	4.2606	2.18238	1.8898	1.72215	TRUE	FALSE	FALSE
NM_001022.3	ribosomal protein S19 (RPS19)	RPS19	FALSE	FALSE	8.39949	61.588	23.8803	18.3183	10.5922	0.0055035	0.884324	0.0205643	7.33235	2.84307	2.18088	1.26105	2.57903	TRUE	FALSE	TRUE
BC056413.1	PHD finger protein 20-like 1 (PHF20L1)	PHF20L1	FALSE	FALSE	11.8868	87.1542	8.03507	25.9225	3.56398	0.147553	0.999999	0.00429536	7.33203	0.675968	2.18079	0.299828	10.8467	FALSE	FALSE	FALSE
NM_002647.1	phosphoinositide-3-kinase, class 3 (PIK3C3)	PIK3C3	FALSE	FALSE	8.13001	59.5218	23.9233	17.7037	10.6112	0.139612	0.999999	0.0279272	7.32124	2.94259	2.17758	1.3052	2.48803	FALSE	FALSE	FALSE
NM_022165.1	lin-7 homolog B (C. elegans) (LIN7B)	LIN7B	FALSE	FALSE	2.30029	16.8382	3.06076	5.00824	1.35761	0.3976	0.999999	0.0301958	7.32005	1.3306	2.17722	0.590193	5.50131	FALSE	FALSE	FALSE
BC015416.1	ring finger protein 32 (RNF32)	RNF32	FALSE	FALSE	6.51929	47.7162	14.3454	14.1924	6.36296	0.00147187	0.999999	5.14003e-05	7.31923	2.20046	2.17698	0.976021	3.32623	TRUE	FALSE	TRUE
NM_153283.1	hyaluronoglucosaminidase 1 (HYAL1), transcript variant 3	HYAL1	FALSE	FALSE	4.99303	36.4725	12.5479	10.8481	5.56569	0.0225241	0.999999	0.00617909	7.30468	2.51309	2.17265	1.11469	2.90665	TRUE	FALSE	TRUE
NM_025133.3	F-box protein 11 (FBXO11), transcript variant 1	FBXO11	FALSE	FALSE	9.05864	66.1621	24.6863	19.6788	10.9497	0.00772196	0.999999	0.0246456	7.30375	2.72516	2.17238	1.20876	2.68011	TRUE	FALSE	TRUE
NM_004697.3	PRP4 pre-mRNA processing factor 4 homolog (yeast) (PRPF4)	PRPF4	FALSE	FALSE	14.5309	106.119	65.7575	31.5634	29.167	0.0186403	0.654265	0.318315	7.30303	4.52536	2.17216	2.00724	1.6138	TRUE	FALSE	FALSE
BC098400.1	C-terminal-binding protein 1	CTBP1	FALSE	FALSE	18.0834	131.953	82.0898	39.247	36.4112	0.00081995	0.435196	0.0509004	7.29689	4.53951	2.17033	2.01351	1.60742	TRUE	FALSE	FALSE
NM_020182.3	transmembrane, prostate androgen induced RNA (TMEPAI), transcript variant 1	PMEPA1	FALSE	FALSE	18.2891	133.451	79.7614	39.6926	35.3785	0.0381919	0.999999	0.0736658	7.29672	4.36114	2.17028	1.9344	1.67312	TRUE	FALSE	FALSE
NM_005653.2	Alpha-globin transcription factor CP2	TFCP2	FALSE	FALSE	11.6798	85.1933	71.5029	25.3393	31.7154	0.871858	0.999999	0.557107	7.29404	6.1219	2.16949	2.71539	1.19147	FALSE	FALSE	FALSE
NM_207316.1	Transmembrane protein 207	TMEM207	FALSE	FALSE	10.5399	76.7982	53.9506	22.8423	23.93	0.0952855	0.743428	0.465887	7.28646	5.11872	2.16723	2.27043	1.42349	FALSE	FALSE	FALSE
BC050709.1	Archaemetzincin-2	AMZ2	FALSE	FALSE	1.12432	8.19133	20.7915	2.43637	9.22213	0.0688274	0.473218	0.486207	7.28557	18.4925	2.16697	8.2024	0.393976	FALSE	FALSE	FALSE
NM_058238.1	wingless-type MMTV integration site family, member 7B (WNT7B)	WNT7B	FALSE	FALSE	8.43544	61.4404	22.7195	18.2744	10.0773	0.00307699	0.999999	0.00329872	7.2836	2.69334	2.16638	1.19464	2.7043	TRUE	FALSE	TRUE
NM_003973.2	Ribosomal protein L14 (RPL14), mRNA	RPL14	FALSE	FALSE	4.37049	31.8282	7.27808	9.46676	3.22822	0.057254	0.999999	0.000644682	7.28253	1.66528	2.16606	0.738639	4.37317	FALSE	FALSE	FALSE
NM_002648.1	pim-1 oncogene (PIM1)	PIM1	FALSE	FALSE	14.5871	106.103	36.1113	31.5584	16.0173	0.0260183	0.999999	0.00707535	7.27371	2.47556	2.16344	1.09804	2.93821	TRUE	FALSE	TRUE
NM_173806.2	chromosome 16 open reading frame 65 (C16orf65)	PDZD9	FALSE	FALSE	7.33749	53.3579	17.3307	15.8704	7.68709	0.0113598	0.999999	0.00187658	7.27196	2.36194	2.16292	1.04765	3.07881	TRUE	FALSE	TRUE
NM_004503.2	homeobox C6 (HOXC6), transcript variant 1	HOXC6	FALSE	FALSE	5.00559	36.3937	15.3359	10.8247	6.80231	0.00146125	0.999999	0.00265109	7.27061	3.06376	2.16252	1.35894	2.3731	TRUE	FALSE	TRUE
NP_694592	FYN Recombinant Human Protein	FYN	FALSE	FALSE	21.2396	154.347	52.6842	45.9077	23.3683	0.00076642	0.999999	5.14003e-05	7.26693	2.48047	2.16142	1.10022	2.92966	TRUE	FALSE	TRUE
NM_018667.2	sphingomyelin phosphodiesterase 3, neutral membrane (neutral sphingomyelinase II) (SMPD3)	SMPD3	FALSE	FALSE	10.3587	75.2481	44.0073	22.3812	19.5196	0.149994	0.889007	0.408826	7.26427	4.24835	2.16063	1.88437	1.7099	FALSE	FALSE	FALSE
NM_014157.2	Coiled-coil domain-containing protein 113	CCDC113	FALSE	FALSE	4.00458	29.0801	5.23625	8.64936	2.32256	0.0592936	0.999999	0.00156762	7.26171	1.30757	2.15987	0.579976	5.5536	FALSE	FALSE	FALSE
NM_017426.2	Nucleoporin 54kDa (NUP54), mRNA	NUP54	FALSE	FALSE	7.89524	57.3089	16.0083	17.0456	7.10052	0.00298079	0.999999	5.14003e-05	7.25867	2.02758	2.15897	0.899343	3.57996	TRUE	FALSE	TRUE
BC040946.1	CWC15 homolog (S. cerevisiae) (HSPC148)	CWC15	FALSE	FALSE	13.2884	96.3903	33.4056	28.6696	14.8172	0.00780904	0.999999	0.0107664	7.2537	2.51389	2.15749	1.11504	2.88545	TRUE	FALSE	TRUE
NM_173847.2	Sperm acrosome associated 3 (SPACA3), mRNA	SPACA3	FALSE	FALSE	7.05329	51.1191	16.6474	15.2045	7.38402	0.0332786	0.999999	0.00785874	7.24754	2.36023	2.15566	1.04689	3.07069	TRUE	FALSE	TRUE
NM_002425.1	Matrix metalloproteinase 10 (stromelysin 2) (MMP10), mRNA	MMP10	FALSE	FALSE	6.56169	47.5163	21.7977	14.1329	9.66846	0.0404508	0.999999	0.127359	7.24148	3.32197	2.15385	1.47347	2.17988	TRUE	FALSE	FALSE
NM_020374.2	chromosome 12 open reading frame 4 (C12orf4)	C12orf4	FALSE	FALSE	4.57394	33.0591	10.4113	9.83286	4.61795	0.0229238	0.999999	0.00456598	7.22771	2.27621	2.14976	1.00962	3.17532	TRUE	FALSE	TRUE
BC013031.1	Pleckstrin homology-like domain family B member 1	PHLDB1	FALSE	FALSE	45.9647	332.044	131.9	98.7609	58.5046	0.107296	0.999999	0.0880737	7.2239	2.86959	2.14862	1.27282	2.5174	FALSE	FALSE	FALSE
NM_001031812.2	casein kinase 1, gamma 3 (CSNK1G3), transcript variant 2	CSNK1G3	FALSE	FALSE	6.06353	43.758	18.1982	13.0151	8.07187	0.37721	0.999999	0.0209386	7.21659	3.00125	2.14645	1.33122	2.40452	FALSE	FALSE	FALSE
BC036900.1	Hypothetical protein FLJ10036, mRNA (cDNA clone MGC:46079 IMAGE:5535106), complete cds	ZWILCH	FALSE	FALSE	3.18415	22.9692	7.733	6.83178	3.43	0.00238362	0.999999	5.14003e-05	7.2136	2.42859	2.14556	1.07721	2.97028	TRUE	FALSE	TRUE
NM_144697.1	chromosome 1 open reading frame 51 (C1orf51)	CIART	FALSE	FALSE	11.7185	84.5148	33.4142	25.1375	14.821	0.00280918	0.999999	0.00292357	7.21208	2.8514	2.14511	1.26475	2.52931	TRUE	FALSE	TRUE
NM_177988.1	Mitochondrial ribosomal protein L47 (MRPL47), nuclear gene encoding mitochondrial protein, transcript variant 2, mRNA	MRPL47	FALSE	FALSE	7.21046	51.9861	16.2316	15.4624	7.19957	0.0399012	0.999999	0.00206613	7.20983	2.25111	2.14444	0.99849	3.20278	TRUE	FALSE	TRUE
NM_025099.1	chromosome 17 open reading frame 68 (C17orf68)	CTC1	FALSE	FALSE	5.8997	42.5112	13.2009	12.6442	5.8553	0.00135626	0.999999	5.14003e-05	7.20566	2.23755	2.1432	0.992475	3.22033	TRUE	FALSE	TRUE
NM_181705.1	Lyrm7 homolog (mouse) (LYRM7)	LYRM7	FALSE	FALSE	6.44247	46.4217	21.4058	13.8073	9.49462	0.00351923	0.999999	0.00889682	7.20557	3.32261	2.14317	1.47376	2.16865	TRUE	FALSE	TRUE
BC005955.1	chromosome 8 open reading frame 53 (C8orf53)	UTP23	FALSE	FALSE	6.02309	43.3824	14.8185	12.9034	6.57278	0.00734533	0.999999	0.0140039	7.20268	2.46027	2.14231	1.09126	2.92759	TRUE	FALSE	TRUE
P23515	OMG / OMGP (aa 1-416) Protein (His Tag)	OMG	FALSE	TRUE	2.00905	14.4584	3.37778	4.30041	1.49823	0.0336012	0.999999	0.00266635	7.19663	1.68128	2.14051	0.745737	4.28045	TRUE	FALSE	TRUE
NM_030768.2	integrin-linked kinase-associated serine/threonine phosphatase 2C (ILKAP)	ILKAP	FALSE	FALSE	14.4204	103.751	55.3691	30.859	24.5591	0.0639012	0.999999	0.180371	7.19477	3.83964	2.13996	1.70309	1.87381	FALSE	FALSE	FALSE
NM_005916.2	minichromosome maintenance complex component 7 (MCM7), transcript variant 1	MCM7	FALSE	FALSE	6.95014	49.9878	20.1425	14.868	8.9343	0.00235523	0.999999	0.00370753	7.19235	2.89815	2.13924	1.28548	2.48171	TRUE	FALSE	TRUE
NM_019613.2	WDR45-like (WDR45L)	WDR45B	FALSE	FALSE	5.27272	37.9071	13.7067	11.2748	6.07964	0.00750667	0.999999	0.000389467	7.18929	2.59954	2.13833	1.15304	2.7656	TRUE	FALSE	TRUE
NM_012224.1	NIMA (never in mitosis gene a)-related kinase 1 (NEK1)	NEK1	FALSE	FALSE	10.1893	73.2505	49.2597	21.7871	21.8493	0.0323873	0.999999	0.0840433	7.18896	4.83446	2.13823	2.14434	1.48703	TRUE	FALSE	FALSE
BC009738.1	phenazine biosynthesis-like protein domain containing (PBLD)	PBLD	FALSE	FALSE	10.2898	73.9647	27.2078	21.9995	12.0681	0.262796	0.999999	0.255547	7.18814	2.64415	2.13799	1.17282	2.71851	FALSE	FALSE	FALSE
NM_001039724.1	Nostrin	NOSTRIN	FALSE	FALSE	12.8745	92.4674	55.0974	27.5028	24.4387	0.00596286	0.669152	0.0984775	7.18221	4.27957	2.13622	1.89822	1.67825	TRUE	FALSE	FALSE
BC035878.1	solute carrier family 2 (facilitated glucose/fructose transporter), member 5 (SLC2A5)	SLC2A5	FALSE	FALSE	6.00685	43.14	16.1238	12.8312	7.15177	0.00852259	0.999999	0.00292357	7.1818	2.68423	2.1361	1.1906	2.67555	TRUE	FALSE	TRUE
NM_078480.1	Fuse-binding protein-interacting repressor (SIAHBP1), transcript variant 1, mRNA	PUF60	FALSE	FALSE	12.5812	90.3353	33.1057	26.8687	14.6842	0.184795	0.999999	0.0876213	7.18018	2.63136	2.13562	1.16715	2.72869	FALSE	FALSE	FALSE
NM_080612.1	GRB2-associated binding protein 3 (GAB3), transcript variant 2	GAB3	FALSE	FALSE	6.93058	49.7617	13.7333	14.8007	6.09144	0.00613325	0.999999	0.00251914	7.18001	1.98155	2.13557	0.878922	3.62344	TRUE	FALSE	TRUE
NM_004162.2	Ras-related protein Rab-5A	RAB5A	FALSE	FALSE	15.7144	112.808	75.365	33.5528	33.4284	0.0119527	0.485633	0.330881	7.17865	4.79593	2.13517	2.12725	1.49682	TRUE	FALSE	FALSE
NM_004656.2	BRCA1 associated protein-1 (ubiquitin carboxy-terminal hydrolase) (BAP1)	BAP1	FALSE	FALSE	11.001	78.964	44.0149	23.4865	19.523	0.186932	0.999999	0.300391	7.17786	4.00098	2.13493	1.77465	1.79403	FALSE	FALSE	FALSE
NM_006891.2	Gamma-crystallin D	CRYGD	FALSE	FALSE	4.96286	35.6032	13.6446	10.5896	6.05213	0.0214328	0.999999	0.0552663	7.17393	2.74935	2.13376	1.21948	2.60932	TRUE	FALSE	FALSE
NM_003981.2	protein regulator of cytokinesis 1 (PRC1), transcript variant 1	PRC1	FALSE	FALSE	1.94489	13.9462	2.57415	4.14806	1.14178	0.180444	0.999999	0.0260662	7.17069	1.32355	2.1328	0.587064	5.41778	FALSE	FALSE	FALSE
NM_000197.1	Testosterone 17-beta-dehydrogenase 3	HSD17B3	FALSE	FALSE	5.25134	37.5336	12.5115	11.1637	5.54951	0.522152	0.999999	0.193387	7.14743	2.38253	2.12588	1.05678	2.99993	FALSE	FALSE	FALSE
NM_145699.2	apolipoprotein B mRNA editing enzyme, catalytic polypeptide-like 3A (APOBEC3A)	APOBEC3A	FALSE	FALSE	11.5608	82.5699	38.9359	24.559	17.2702	0.122633	0.999999	0.228087	7.14222	3.36791	2.12433	1.49385	2.12066	FALSE	FALSE	FALSE
NM_001888.2	Mu-crystallin homolog	CRYM	FALSE	TRUE	13.5437	96.7139	49.7454	28.7659	22.0648	0.0135571	0.999999	0.0301923	7.14089	3.67296	2.12393	1.62915	1.94418	TRUE	FALSE	FALSE
BC017901.1	phospholipid scramblase 1 (PLSCR1)	PLSCR1	FALSE	FALSE	24.5637	175.11	85.4012	52.0833	37.88	0.00238931	0.895634	0.0149224	7.12881	3.47673	2.12034	1.54212	2.05044	TRUE	FALSE	TRUE
NM_153378.1	Solute carrier family 22 member 12	SLC22A12	FALSE	FALSE	5.53134	39.4306	13.3509	11.7279	5.92184	0.0198176	0.999999	0.006963	7.12858	2.41368	2.12027	1.0706	2.95341	TRUE	FALSE	TRUE
NM_014972.1	Transcription factor 25	TCF25	FALSE	FALSE	7.71446	54.9765	27.6924	16.3518	12.2831	0.150043	0.999999	0.23193	7.12642	3.58968	2.11963	1.59221	1.98525	FALSE	FALSE	FALSE
NM_004738.1	VAMP (vesicle-associated membrane protein)-associated protein B and C (VAPB)	VAPB	FALSE	TRUE	55.403	394.395	6.96633	117.306	3.08994	0.212986	0.999999	0	7.11867	0.125739	2.11732	0.0557721	56.6145	FALSE	FALSE	FALSE
BC033758.1	centaurin, alpha 2 (CENTA2)	ADAP2	FALSE	FALSE	6.11987	43.5547	17.4175	12.9546	7.72561	0.00252905	0.999999	0.00189551	7.11693	2.84606	2.11681	1.26238	2.50063	TRUE	FALSE	TRUE
NM_173565.1	Radial spoke head 10 homolog B2	RSPH10B	FALSE	FALSE	7.7013	54.7965	17.9121	16.2983	7.94499	0.00460526	0.999999	0.00129616	7.11523	2.32586	2.1163	1.03164	3.05918	TRUE	FALSE	TRUE
NM_032960.2	MAP kinase-activated protein kinase 2	MAPKAPK2	FALSE	FALSE	6.35003	45.1702	26.2017	13.4351	11.6219	0.0690964	0.999999	0.120663	7.11339	4.12624	2.11576	1.83021	1.72394	FALSE	FALSE	FALSE
NM_000154.1	galactokinase 1 (GALK1)	GALK1	FALSE	FALSE	13.972	99.3834	56.4206	29.5599	25.0256	0.369242	0.999999	0.394646	7.11302	4.03811	2.11565	1.79112	1.76147	FALSE	FALSE	FALSE
BC008838.1	Dual specificity mitogen-activated protein kinase kinase 5	MAP2K5	FALSE	FALSE	5.41109	38.4868	17.3058	11.4472	7.67605	0.00430974	0.999999	0.0039128	7.11258	3.19821	2.11551	1.41858	2.22392	TRUE	FALSE	TRUE
BC064965.1	Cyclin-dependent kinase inhibitor 3 (CDK2-associated dual specificity phosphatase), mRNA (cDNA clone MGC:70625 IMAGE:6143626), complete cds	CDKN3	FALSE	FALSE	7.00328	49.7943	18.5476	14.8105	8.22684	0.000986695	0.999999	0.00032916	7.11015	2.64841	2.11479	1.17471	2.68468	TRUE	FALSE	TRUE
BC034621.1	KIAA0205 gene product, mRNA (cDNA clone MGC:43049 IMAGE:4839400), complete cds	LPGAT1	FALSE	FALSE	6.40689	45.5345	15.1054	13.5434	6.70004	0.023102	0.999999	0.00270704	7.10711	2.35767	2.11389	1.04575	3.01446	TRUE	FALSE	TRUE
NM_173567.2	Abhydrolase domain containing 7 (ABHD7), mRNA	EPHX4	FALSE	FALSE	7.78065	55.2875	16.5784	16.4443	7.35343	0.209197	0.999999	0.0307343	7.10576	2.13073	2.11349	0.945091	3.3349	FALSE	FALSE	FALSE
BC064428.1	Sodium channel and clathrin linker 1	SCLT1	FALSE	FALSE	11.5101	81.7829	50.5216	24.3249	22.409	0.00730955	0.999999	0.024898	7.10531	4.38932	2.11335	1.9469	1.61877	TRUE	FALSE	FALSE
BC024272.1	CD74 molecule, major histocompatibility complex, class II invariant chain (CD74)	CD74	FALSE	FALSE	7.27431	51.6803	13.2133	15.3714	5.8608	0.0253664	0.999999	0.00370753	7.10449	1.81643	2.11311	0.805684	3.91124	TRUE	FALSE	TRUE
NM_000990.2	Ribosomal protein L27a (RPL27A), mRNA	RPL27A	FALSE	FALSE	4.58558	32.5722	10.7013	9.68803	4.74662	0.0119023	0.999999	0.0134769	7.10318	2.33369	2.11272	1.03512	3.04375	TRUE	FALSE	TRUE
BC044584.1	DnaJ (Hsp40) homolog, subfamily C, member 4 (DNAJC4)	DNAJC4	FALSE	FALSE	8.44518	59.9819	22.4304	17.8406	9.94909	0.0244703	0.999999	0.0142192	7.1025	2.656	2.11252	1.17808	2.67413	TRUE	FALSE	TRUE
NM_001626.2	v-akt murine thymoma viral oncogene homolog 2 (AKT2)	AKT2	FALSE	FALSE	6.9831	49.5834	22.4323	14.7477	9.94993	0.00488871	0.999999	0.00171555	7.10049	3.21237	2.11192	1.42486	2.21036	TRUE	FALSE	TRUE
NM_032276.2	Hypothetical protein DKFZp547E052 (DKFZp547E052), mRNA	RHBDD1	FALSE	FALSE	6.65459	47.2002	13.0741	14.0389	5.79905	0.0557339	0.999999	0.00937915	7.09288	1.96467	2.10965	0.871437	3.61021	FALSE	FALSE	FALSE
NM_000351.3	steroid sulfatase (microsomal), isozyme S (STS)	STS	FALSE	FALSE	3.46007	24.5368	7.26167	7.29805	3.22094	0.00463397	0.999999	5.14003e-05	7.09143	2.09871	2.10922	0.930889	3.37895	TRUE	FALSE	TRUE
BC032822.2	erythrocyte membrane protein band 4.1 like 5 (EPB41L5)	EPB41L5	FALSE	FALSE	8.5369	60.5166	39.1208	17.9996	17.3522	0.00238931	0.613967	0.0202176	7.08882	4.58255	2.10845	2.03261	1.54691	TRUE	FALSE	FALSE
NM_181643.2	Chromosome 1 open reading frame 88 (C1orf88), mRNA	PIFO	TRUE	FALSE	5.21504	36.8948	10.9177	10.9737	4.8426	0.0172181	0.999999	0.000252772	7.07469	2.09351	2.10424	0.928583	3.37934	TRUE	FALSE	TRUE
NM_018467.2	unconventional SNARE in the ER 1 homolog (S. cerevisiae) (USE1)	USE1	FALSE	FALSE	7.96014	56.2866	14.9136	16.7415	6.61497	0.0164881	0.999999	0.000220409	7.07106	1.87353	2.10317	0.831012	3.77419	TRUE	FALSE	TRUE
BC013163.1	DCN1-like protein 1	DCUN1D1	FALSE	FALSE	4.69698	33.181	13.7195	9.86912	6.08534	0.0543066	0.999999	0.0169397	7.06434	2.92093	2.10116	1.29559	2.41853	FALSE	FALSE	FALSE
BC000251.1	Glycogen synthase kinase-3 beta	GSK3B	FALSE	FALSE	8.22646	58.1114	25.0565	17.2842	11.1139	0.0178501	0.999999	0.0426627	7.06396	3.04584	2.10105	1.35099	2.31921	TRUE	FALSE	TRUE
NM_152653.1	ubiquitin-conjugating enzyme E2E 2 (UBC4/5 homolog, yeast) (UBE2E2)	UBE2E2	FALSE	FALSE	15.7726	111.358	48.7544	33.1214	21.6252	0.0564386	0.999999	0.0588575	7.06019	3.09108	2.09993	1.37106	2.28405	FALSE	FALSE	FALSE
NM_000160.1	glucagon receptor (GCGR)	GCGR	FALSE	FALSE	6.27897	44.2751	13.3294	13.1689	5.91231	0.0172587	0.999999	0.00408696	7.05133	2.12286	2.0973	0.941604	3.32161	TRUE	FALSE	TRUE
NM_153236.2	GTPase, IMAP family member 7 (GIMAP7)	GIMAP7	FALSE	FALSE	8.46264	59.6456	20.8114	17.7405	9.23099	0.0556402	0.999999	0.00206613	7.04811	2.45922	2.09634	1.09079	2.866	FALSE	FALSE	FALSE
NM_031297.1	ring finger protein 208 (RNF208)	RNF208	FALSE	FALSE	13.5347	95.3542	49.9338	28.3615	22.1483	0.337194	0.999999	0.277157	7.04515	3.68931	2.09546	1.63641	1.90961	FALSE	FALSE	FALSE
NM_133496.3	Zinc transporter 7	SLC30A7	FALSE	FALSE	3.84325	27.0561	8.36933	8.04737	3.71225	0.0257971	0.999999	0.00470438	7.03989	2.17767	2.0939	0.965913	3.23277	TRUE	FALSE	TRUE
BC031413.1	4-aminobutyrate aminotransferase, transcript variant 1, mRNA (cDNA clone MGC:35480 IMAGE:5195212), complete cds	ABAT	FALSE	FALSE	4.43296	31.2015	7.37585	9.28035	3.27159	0.20389	0.999999	0.0039128	7.03853	1.66387	2.09349	0.738014	4.23023	FALSE	FALSE	FALSE
NM_152658.1	THAP domain containing 8 (THAP8), mRNA	THAP8	FALSE	FALSE	3.16832	22.2908	5.59767	6.63001	2.48287	0.0192302	0.999999	0.000389467	7.03552	1.76676	2.09259	0.783654	3.98215	TRUE	FALSE	TRUE
BC016911.1	RecQ protein-like 5 (RECQL5)	RECQL5	FALSE	FALSE	4.75773	33.4636	8.82562	9.95318	3.91463	0.0028529	0.999999	0	7.03353	1.85501	2.092	0.822795	3.79165	TRUE	FALSE	TRUE
NM_001125.2	ADP-ribosylarginine hydrolase (ADPRH)	ADPRH	FALSE	FALSE	6.26462	44.0526	12.0238	13.1027	5.3332	0.0807688	0.999999	0.00177799	7.03197	1.91932	2.09154	0.851321	3.66378	FALSE	FALSE	FALSE
NM_174900.2	Zinc finger protein 42 (ZFP42), mRNA	ZFP42	FALSE	FALSE	3.46174	24.3406	5.00959	7.23968	2.22202	0.0367071	0.999999	0.000321757	7.03131	1.44713	2.09134	0.64188	4.8588	TRUE	FALSE	TRUE
BC015993.1	Protein FAM151A	FAM151A	FALSE	FALSE	5.35167	37.5698	10.566	11.1745	4.68657	0.00114986	0.999999	0	7.0202	1.97433	2.08804	0.87572	3.55574	TRUE	FALSE	TRUE
NM_001971.4	Elastase 1, pancreatic (ELA1), mRNA	CELA1	FALSE	FALSE	4.14129	29.0564	9.0319	8.64234	4.00613	0.00512662	0.999999	0.00032916	7.01627	2.18094	2.08687	0.967362	3.21709	TRUE	FALSE	TRUE
NM_145810.1	cell division cycle associated 7 (CDCA7), transcript variant 2	CDCA7	FALSE	FALSE	4.96976	34.8489	16.3888	10.3652	7.26932	0.0135489	0.999999	0.0354291	7.0122	3.29771	2.08566	1.46271	2.12639	TRUE	FALSE	TRUE
NM_153332.2	three prime histone mRNA exonuclease 1 (THEX1)	ERI1	FALSE	FALSE	1.48452	10.4048	2.62414	3.09472	1.16395	0.0584949	0.999999	0.00224301	7.00884	1.76767	2.08466	0.784056	3.96502	FALSE	FALSE	FALSE
NM_001842.3	Ciliary neurotrophic factor receptor (CNTFR), transcript variant 2, mRNA	CNTFR	FALSE	FALSE	8.33241	58.3906	30.2489	17.3673	13.417	0.00727366	0.899034	0.0139544	7.00766	3.63027	2.08431	1.61022	1.93034	TRUE	FALSE	FALSE
BC062422.1	interleukin 27 (IL27)	IL27	FALSE	FALSE	5.71758	40.0343	11.3247	11.9075	5.02311	0.00197994	0.999999	5.14003e-05	7.00197	1.98068	2.08261	0.878537	3.53514	TRUE	FALSE	TRUE
NM_006564.1	Chemokine (C-X-C motif) receptor 6 (CXCR6), mRNA	CXCR6	FALSE	FALSE	4.34161	30.399	7.73481	9.04166	3.43081	0.0546855	0.999999	0.0089968	7.00178	1.78155	2.08256	0.790214	3.93015	FALSE	FALSE	FALSE
NM_014062.1	NIN1/RPN12 binding protein 1 homolog (S. cerevisiae) (NOB1)	NOB1	FALSE	FALSE	12.1394	84.9536	29.9711	25.268	13.2938	0.00530969	0.999999	0.00156762	6.99819	2.46892	2.08149	1.0951	2.83451	TRUE	FALSE	TRUE
NM_005975.2	PTK6 protein tyrosine kinase 6 (PTK6)	PTK6	FALSE	FALSE	7.11696	49.7958	20.3429	14.8109	9.02318	0.0121376	0.999999	0.00438896	6.99678	2.85837	2.08107	1.26784	2.44782	TRUE	FALSE	TRUE
NM_001896.1	Casein kinase 2, alpha prime polypeptide (CSNK2A2), mRNA	CSNK2A2	TRUE	TRUE	9.12464	63.8249	29.618	18.9836	13.1372	0.0412267	0.999999	0.0551804	6.99479	3.24593	2.08048	1.43974	2.15494	TRUE	FALSE	FALSE
BC023990.1	annexin A2 (ANXA2)	ANXA2	FALSE	FALSE	11.1865	78.2093	27.6584	23.262	12.268	0.286008	0.999999	0.0490545	6.99139	2.47248	2.07947	1.09668	2.82769	FALSE	FALSE	FALSE
BC030237.1	solute carrier family 22 (organic cation transporter), member 18 antisense (SLC22A18AS)	SLC22A18AS	FALSE	FALSE	15.5853	108.932	52.2729	32.4	23.1859	0.0254188	0.999999	0.0326135	6.98941	3.35399	2.07888	1.48767	2.08391	TRUE	FALSE	TRUE
BC064145.1	CDK5 regulatory subunit associated protein 1-like 1 (CDKAL1)	CDKAL1	FALSE	FALSE	6.8922	48.1674	18.3717	14.3266	8.14885	0.00602154	0.999999	0.000668819	6.98869	2.66558	2.07866	1.18233	2.62182	TRUE	FALSE	TRUE
NM_031452.1	family with sequence similarity 103, member A1 (FAM103A1)	FAM103A1	FALSE	FALSE	5.40256	37.7553	13.2419	11.2297	5.8735	0.00599864	0.999999	0.00129616	6.98841	2.45105	2.07858	1.08717	2.85119	TRUE	FALSE	TRUE
BC011668.1	Casein kinase II subunit alpha	CSNK2A1	FALSE	TRUE	11.6751	81.5884	56.9605	24.2671	25.265	0.338755	0.999999	0.232156	6.98824	4.8788	2.07853	2.16401	1.43237	FALSE	FALSE	FALSE
BC052800.1	Protein tyrosine phosphatase, non-receptor type 18 (brain-derived), mRNA (cDNA clone MGC:59686 IMAGE:5809095), complete cds	PTPN18	FALSE	FALSE	10.4423	72.9647	23.7671	21.7021	10.542	0.00211407	0.999999	0.000895213	6.98745	2.27605	2.0783	1.00955	3.06999	TRUE	FALSE	TRUE
BC016582.1	polypyrimidine tract binding protein 2 (PTBP2)	PTBP2	FALSE	FALSE	4.47604	31.2474	7.67644	9.29399	3.40491	0.0144578	0.999999	0.00079025	6.98103	1.71501	2.07639	0.760697	4.07055	TRUE	FALSE	TRUE
NM_014773.2	KIAA0141 (KIAA0141)	KIAA0141	FALSE	FALSE	4.21027	29.3647	6.22063	8.73403	2.75918	0.0125189	0.999999	5.14003e-05	6.97456	1.47749	2.07446	0.655346	4.72054	TRUE	FALSE	TRUE
NM_014188.2	SSU72 RNA polymerase II CTD phosphatase homolog (S. cerevisiae) (SSU72)	SSU72	FALSE	FALSE	9.56018	66.6352	28.4368	19.8195	12.6133	0.0739038	0.999999	0.338827	6.97008	2.97451	2.07313	1.31935	2.34327	FALSE	FALSE	FALSE
NP_065923.1	CNTN3 / Contactin-3 Protein (His Tag)	CNTN3	FALSE	FALSE	1.41873	9.88339	4.31116	2.93964	1.91223	0.024022	0.999999	0.0389028	6.96638	3.03876	2.07203	1.34785	2.29251	TRUE	FALSE	TRUE
NM_012315.1	kallikrein-related peptidase 9 (KLK9)	KLK9	FALSE	FALSE	7.05953	49.177	16.6739	14.6269	7.39577	0.00272005	0.999999	0.00032916	6.96605	2.3619	2.07193	1.04763	2.94934	TRUE	FALSE	TRUE
NM_018147.1	Fas apoptotic inhibitory molecule (FAIM), transcript variant 4	FAIM	FALSE	FALSE	11.7178	81.6242	27.3137	24.2777	12.1151	0.47069	0.999999	0.303088	6.9658	2.33095	2.07186	1.0339	2.9884	FALSE	FALSE	FALSE
CAD91166	Fibronectin / Fibronectin Fragment 2 Protein (His Tag)	FN1	FALSE	FALSE	2.56629	17.8573	8.8995	5.31135	3.94741	0.871858	0.999999	0.595144	6.95842	3.46785	2.06966	1.53818	2.00655	FALSE	FALSE	FALSE
BC024291.1	BR serine/threonine kinase 2 (BRSK2)	BRSK2	FALSE	FALSE	16.0332	111.531	33.4677	33.1729	14.8447	0.0399372	0.999999	0.0363834	6.95624	2.0874	2.06901	0.925872	3.3325	TRUE	FALSE	TRUE
NM_018348.4	hypothetical protein FLJ11171 (FLJ11171), transcript variant 1	CMTR2	FALSE	FALSE	9.10321	63.2928	31.4168	18.8253	13.9351	0.588859	0.999999	0.16926	6.9528	3.45118	2.06799	1.53078	2.01461	FALSE	FALSE	FALSE
BC042090.1	muscleblind-like 3 (Drosophila) (MBNL3)	MBNL3	FALSE	FALSE	59.5995	414.142	186.091	123.179	82.5415	0.0157099	0.999999	0.00677247	6.94875	3.12237	2.06678	1.38494	2.22547	TRUE	FALSE	TRUE
NM_003867	FGF17 Recombinant Human Protein	FGF17	FALSE	FALSE	3.99362	27.7367	4.81648	8.2498	2.13637	0.051997	0.999999	0.00139717	6.94525	1.20604	2.06574	0.534944	5.75871	FALSE	FALSE	FALSE
BC017355.1	karyopherin alpha 3 (importin alpha 4) (KPNA3)	KPNA3	FALSE	FALSE	8.02411	55.5604	30.2499	16.5255	13.4175	0.0150739	0.675366	0.288504	6.92418	3.76988	2.05948	1.67214	1.83671	TRUE	FALSE	FALSE
NM_020467.2	small trans-membrane and glycosylated protein (LOC57228), transcript variant 2	SMAGP	FALSE	FALSE	13.1735	91.2133	30.7014	27.1298	13.6177	0.0800448	0.999999	0.088002	6.92402	2.33055	2.05943	1.03372	2.97099	FALSE	FALSE	FALSE
NM_003374.1	voltage-dependent anion channel 1 (VDAC1)	VDAC1	FALSE	TRUE	6.40163	44.3178	13.3587	13.1816	5.92532	0.00596286	0.999999	0.000220409	6.92289	2.08677	2.05909	0.925595	3.31751	TRUE	FALSE	TRUE
NM_020376.2	patatin-like phospholipase domain containing 2 (PNPLA2)	PNPLA2	FALSE	FALSE	5.50555	38.1045	11.822	11.3335	5.24369	0.104379	0.999999	0.00278095	6.92111	2.14729	2.05856	0.952438	3.22318	FALSE	FALSE	FALSE
NM_002764.2	phosphoribosyl pyrophosphate synthetase 1 (PRPS1)	PRPS1	FALSE	FALSE	11.9948	83.0137	28.089	24.691	12.459	0.00488871	0.999999	0.00335755	6.92078	2.34176	2.05847	1.0387	2.95538	TRUE	FALSE	TRUE
BC033677.1	Uncharacterized protein C9orf114	SPOUT1	FALSE	FALSE	9.61786	66.4272	25.1783	19.7576	11.1679	0.0916528	0.999999	0.148103	6.90665	2.61787	2.05426	1.16117	2.63827	FALSE	FALSE	FALSE
XM_378660.1	PREDICTED: Homo sapiens hypothetical LOC400584 (LOC400584)	C17orf67	FALSE	FALSE	10.1105	69.8079	23.7009	20.7632	10.5126	0.0548377	0.999999	0.0570567	6.90447	2.34418	2.05362	1.03977	2.94537	FALSE	FALSE	FALSE
NM_014184.1	cornichon homolog 4 (Drosophila) (CNIH4)	CNIH4	FALSE	FALSE	7.00328	48.353	13.4347	14.3818	5.959	0.00313711	0.999999	5.14003e-05	6.90434	1.91834	2.05358	0.850888	3.59912	TRUE	FALSE	TRUE
BC018764.1	KIAA1217 (KIAA1217)	KIAA1217	TRUE	TRUE	31.0268	214.062	132.095	63.6689	58.5912	0.210318	0.999999	0.176805	6.89925	4.25745	2.05206	1.88841	1.62051	FALSE	FALSE	FALSE
BC031964.1	glutamate-ammonia ligase (glutamine synthetase) (GLUL)	GLUL	FALSE	FALSE	22.2269	153.333	83.5562	45.6062	37.0617	0.699331	0.999999	0.55273	6.89851	3.75923	2.05184	1.66742	1.83508	FALSE	FALSE	FALSE
BC020602.1	NOL1/NOP2/Sun domain family, member 3 (NSUN3)	NSUN3	FALSE	FALSE	3.99685	27.5624	9.02809	8.19797	4.00444	0.0233908	0.999999	0.006963	6.89604	2.2588	2.05111	1.0019	3.05297	TRUE	FALSE	TRUE
NM_053004.1	guanine nucleotide binding protein (G protein), beta polypeptide 1-like (GNB1L)	GNB1L	FALSE	FALSE	8.96436	61.8109	15.0633	18.3846	6.68136	0.155409	0.999999	0.0055965	6.89518	1.68035	2.05085	0.745325	4.10342	FALSE	FALSE	FALSE
NM_032109.2	Orthopedia homolog (Drosophila) (OTP), mRNA	OTP	FALSE	FALSE	4.9299	33.9873	11.4882	10.1089	5.09562	0.0197708	0.999999	0.00360688	6.89411	2.3303	2.05053	1.03361	2.95846	TRUE	FALSE	TRUE
NM_002046.2	glyceraldehyde-3-phosphate dehydrogenase (GAPDH)	GAPDH	TRUE	TRUE	14.6767	101.143	58.3919	30.0831	25.9	0.0139812	0.527964	0.396816	6.89137	3.97855	2.04972	1.7647	1.73213	TRUE	FALSE	FALSE
BC058938.1	Leucine zipper, putative tumor suppressor 2, mRNA (cDNA clone MGC:65190 IMAGE:3913470), complete cds	LZTS2	FALSE	FALSE	16.9637	116.803	64.7908	34.741	28.7382	0.00596286	0.657539	0.0106724	6.88546	3.81938	2.04796	1.6941	1.80277	TRUE	FALSE	FALSE
NM_005158.2	v-abl Abelson murine leukemia viral oncogene homolog 2 (arg, Abelson-related gene) (ABL2), transcript variant a	ABL2	TRUE	FALSE	24.9195	171.514	79.2473	51.0139	35.1504	0.00351923	0.999999	0.00538087	6.88273	3.18014	2.04715	1.41056	2.16429	TRUE	FALSE	TRUE
NM_032131.3	armadillo repeat containing 2 (ARMC2)	ARMC2	FALSE	FALSE	7.96948	54.8256	29.2461	16.3069	12.9722	0.0302055	0.999999	0.0746938	6.87945	3.66977	2.04617	1.62774	1.87463	TRUE	FALSE	FALSE
NM_017510.1	transmembrane emp24 protein transport domain containing 9 (TMED9)	TMED9	FALSE	FALSE	4.80984	33.0802	12.6154	9.83913	5.59559	0.0511027	0.999999	0.0096043	6.87761	2.62282	2.04562	1.16336	2.62222	FALSE	FALSE	FALSE
NM_001894.2	casein kinase 1, epsilon (CSNK1E), transcript variant 2	CSNK1E	FALSE	FALSE	14.0222	96.4083	38.8934	28.675	17.2513	0.00808579	0.999999	0.0179794	6.87539	2.7737	2.04497	1.23029	2.47878	TRUE	FALSE	TRUE
NM_000187.1	homogentisate 1,2-dioxygenase (homogentisate oxidase) (HGD)	HGD	FALSE	FALSE	9.29821	63.8871	30.5491	19.0021	13.5502	0.00596286	0.999999	0.00895088	6.87091	3.28549	2.04363	1.45729	2.09129	TRUE	FALSE	TRUE
BC095422.1	Pitrilysin metallopeptidase 1, mRNA (cDNA clone MGC:110952 IMAGE:4822631), complete cds	PITRM1	FALSE	FALSE	4.44677	30.5045	9.50614	9.07302	4.21648	0.00340532	0.999999	5.14003e-05	6.85991	2.13776	2.04036	0.948212	3.20892	TRUE	FALSE	TRUE
NM_017971.1	mitochondrial ribosomal protein L20 (MRPL20), nuclear gene encoding mitochondrial protein	MRPL20	FALSE	FALSE	8.48934	58.175	24.2088	17.3032	10.7379	0.0059923	0.999999	0.00370753	6.85272	2.85167	2.03822	1.26487	2.40305	TRUE	FALSE	TRUE
BC071844.1	Claudin-7	CLDN7	FALSE	FALSE	5.75972	39.4635	12.8879	11.7377	5.71646	0.0440807	0.999999	0.00505801	6.85163	2.23759	2.0379	0.992489	3.06206	TRUE	FALSE	TRUE
NM_000262.1	N-acetylgalactosaminidase, alpha- (NAGA)	NAGA	FALSE	FALSE	6.7808	46.4466	16.1095	13.8147	7.14541	0.548242	0.999999	0.021159	6.84973	2.37575	2.03733	1.05377	2.88319	FALSE	FALSE	FALSE
BC028396.1	Polyhomeotic-like protein 2	PHC2	FALSE	FALSE	6.08033	41.6301	13.8876	12.3821	6.1599	0.00596286	0.999999	0.00370753	6.84668	2.28402	2.03643	1.01309	2.99764	TRUE	FALSE	TRUE
BC042608.1	family with sequence similarity 90, member A1 (FAM90A1)	FAM90A1	FALSE	FALSE	18.7152	128.108	71.3085	38.1035	31.6291	0.00351923	0.788666	0.0263661	6.84513	3.81019	2.03596	1.69002	1.79653	TRUE	FALSE	FALSE
NM_014182.2	ORM1-like 2 (S. cerevisiae) (ORMDL2)	ORMDL2	FALSE	FALSE	5.74651	39.3347	10.2058	11.6994	4.52681	0.00532379	0.999999	0.000100095	6.84497	1.776	2.03592	0.78775	3.85416	TRUE	FALSE	TRUE
NP_954701.1	GDNF Recombinant Human Protein	GDNF	FALSE	FALSE	3.63232	24.862	5.56246	7.39478	2.46725	0.0110591	0.999999	0	6.84466	1.53138	2.03583	0.679249	4.46961	TRUE	FALSE	TRUE
NM_032182.2	KIAA0157 (KIAA0157)	FAM175B	FALSE	FALSE	5.65541	38.7049	21.3697	11.5121	9.47861	0.00235584	0.697781	0.0104098	6.84387	3.77863	2.03559	1.67602	1.81121	TRUE	FALSE	FALSE
BC000108.1	WW domain containing E3 ubiquitin protein ligase 2 (WWP2)	WWP2	FALSE	FALSE	14.4227	98.692	8.95176	29.3542	3.97059	0.0694899	0.999999	0	6.84284	0.620673	2.03528	0.275302	11.0249	FALSE	FALSE	FALSE
NM_014044.4	Protein unc-50 homolog	UNC50	FALSE	FALSE	9.99803	68.4041	24.6394	20.3456	10.9289	0.0200738	0.999999	0.0181624	6.84176	2.46443	2.03496	1.09311	2.77621	TRUE	FALSE	TRUE
NM_005781.2	tyrosine kinase, non-receptor, 2	TNK2	FALSE	TRUE	9.48987	64.924	30.7662	19.3105	13.6465	0.0807688	0.999999	0.0356116	6.8414	3.242	2.03486	1.438	2.11024	FALSE	FALSE	FALSE
BC067219.1	statherin (STATH)	STATH	FALSE	FALSE	7.28202	49.7467	21.5288	14.7963	9.54919	0.189584	0.999999	0.10085	6.83144	2.95643	2.03189	1.31134	2.3107	FALSE	FALSE	FALSE
BC021987.2	N-myc (and STAT) interactor (NMI)	NMI	FALSE	FALSE	4.41814	30.1774	9.87224	8.97575	4.37887	0.041309	0.999999	0.00164031	6.83033	2.23448	2.03157	0.99111	3.0568	TRUE	FALSE	TRUE
NM_001328.1	C-terminal binding protein 1 (CTBP1), transcript variant 1	CTBP1	FALSE	FALSE	19.6484	134.184	60.908	39.9106	27.016	0.00262857	0.806331	0.0150646	6.82923	3.09989	2.03124	1.37497	2.20305	TRUE	FALSE	TRUE
NM_145042.1	Tubulin alpha-3 chain	TUBA3FP	FALSE	FALSE	12.4495	85.0148	35.4801	25.2862	15.7373	0.0174778	0.999999	0.0283786	6.82878	2.84993	2.0311	1.2641	2.39612	TRUE	FALSE	TRUE
NM_152717.1	hypothetical protein MGC35295 (MGC35295), transcript variant 2	MS4A15	FALSE	FALSE	6.01334	41.0357	17.0099	12.2054	7.54482	0.0185658	0.999999	0.0164692	6.82411	2.8287	2.02971	1.25468	2.41245	TRUE	FALSE	TRUE
NM_033194.1	heat shock protein, alpha-crystallin-related, B9 (HSPB9)	HSPB9	FALSE	FALSE	16.6271	113.45	51.5128	33.7438	22.8487	0.0938417	0.999999	0.0920961	6.82323	3.09813	2.02945	1.37419	2.20237	FALSE	FALSE	FALSE
NM_005526.1	heat shock transcription factor 1 (HSF1)	HSF1	FALSE	FALSE	18.4873	126.133	99.0897	37.516	43.9516	0.553086	0.999999	0.554133	6.82268	5.35988	2.02929	2.3774	1.27292	FALSE	FALSE	FALSE
NM_152542.2	protein phosphatase 1K (PP2C domain containing) (PPM1K)	PPM1K	FALSE	FALSE	9.82395	67.0054	33.1919	19.9296	14.7224	0.0110178	0.992301	0.0212743	6.82062	3.37867	2.02867	1.49862	2.01873	TRUE	FALSE	TRUE
NM_033377.1	chorionic gonadotropin, beta polypeptide 1 [Source:RefSeq peptide;Acc:NP_203695]	CGB1	FALSE	FALSE	10.137	69.1203	34.6373	20.5586	15.3635	0.191836	0.999999	0.259952	6.81864	3.41693	2.02809	1.51559	1.99555	FALSE	FALSE	FALSE
BC047472.1	Olfactomedin-like protein 2B	OLFML2B	FALSE	FALSE	5.00293	34.0341	15.2335	10.1229	6.75686	0.0610138	0.999999	0.107738	6.80283	3.04491	2.02338	1.35058	2.23417	FALSE	FALSE	FALSE
BC033881.1	XRCC6 binding protein 1 (XRCC6BP1)	ATP23	FALSE	FALSE	12.7106	86.4127	47.2408	25.702	20.9538	0.43535	0.999999	0.135327	6.7985	3.71666	2.0221	1.64854	1.8292	FALSE	FALSE	FALSE
BC033766.1	NADH dehydrogenase (ubiquinone) flavoprotein 3, 10kDa (NDUFV3)	NDUFV3	FALSE	FALSE	13.8603	94.1891	40.4769	28.0149	17.9537	0.0256255	0.857164	0.151533	6.79559	2.92035	2.02123	1.29533	2.32698	TRUE	FALSE	FALSE
NM_130465.3	tetraspanin 17 (TSPAN17), transcript variant 2	TSPAN17	FALSE	FALSE	6.17548	41.9474	13.4689	12.4765	5.97419	0.0180054	0.999999	0.00294879	6.79258	2.18103	2.02034	0.967405	3.11439	TRUE	FALSE	TRUE
NM_175840.1	spermine oxidase (SMOX), transcript variant 2	SMOX	FALSE	FALSE	7.70773	52.3473	17.3394	15.5698	7.69096	0.0191453	0.999999	0.00230645	6.79154	2.24961	2.02003	0.997825	3.01898	TRUE	FALSE	TRUE
NM_021809.2	TGFB-induced factor homeobox 2 (TGIF2)	TGIF2	FALSE	FALSE	18.2106	123.612	106.637	36.7664	47.2993	0.0489008	0.60325	0.491072	6.78793	5.85577	2.01895	2.59735	1.15919	TRUE	FALSE	FALSE
NM_032506.1	KIAA1841 (KIAA1841)	KIAA1841	FALSE	FALSE	12.3178	83.6004	31.095	24.8655	13.7923	0.00745196	0.999999	0.00408696	6.78698	2.5244	2.01867	1.11971	2.68855	TRUE	FALSE	TRUE
NM_002468.2	Myeloid differentiation primary response gene (88) (MYD88), mRNA	MYD88	FALSE	FALSE	1.79553	12.1848	5.60701	3.62416	2.48701	0.150648	0.999999	0.0989928	6.7862	3.12277	2.01844	1.38511	2.17314	FALSE	FALSE	FALSE
BC005294.1	15 kDa selenoprotein, mRNA (cDNA clone MGC:12358 IMAGE:4041321), complete cds	SELENOF	FALSE	FALSE	4.33098	29.3909	7.76335	8.7418	3.44346	0.00596286	0.999999	0	6.7862	1.79252	2.01844	0.795078	3.78585	TRUE	FALSE	TRUE
BC051000.1	T-cell leukemia/lymphoma 1B (TCL1B)	TCL1B	FALSE	FALSE	12.3558	83.7485	39.8334	24.9095	17.6682	0.048547	0.999999	0.0707873	6.7781	3.22387	2.01603	1.42996	2.10247	TRUE	FALSE	FALSE
NM_152377.1	chromosome 1 open reading frame 87 (C1orf87)	C1orf87	FALSE	FALSE	14.79	100.135	51.7407	29.7834	22.9498	0.00775627	0.999999	0.0295711	6.77043	3.49835	2.01375	1.55171	1.93532	TRUE	FALSE	FALSE
NM_017572.2	MAP kinase-interacting serine/threonine-protein kinase 2	MKNK2	FALSE	FALSE	13.1079	88.6913	42.9781	26.3797	19.0631	0.196402	0.999999	0.0976423	6.76623	3.27878	2.0125	1.45432	2.06364	FALSE	FALSE	FALSE
NM_002931.3	ring finger protein 1 (RING1)	RING1	FALSE	FALSE	6.42004	43.3993	18.0272	12.9084	7.99605	0.00980516	0.999999	0.00505801	6.75997	2.80796	2.01064	1.24548	2.40743	TRUE	FALSE	TRUE
BC021704.1	MORN repeat containing 1 (MORN1)	MORN1	FALSE	FALSE	5.48356	37.0204	9.2034	11.0111	4.0822	0.19623	0.999999	0.01768	6.75115	1.67836	2.00801	0.744443	4.02247	FALSE	FALSE	FALSE
BC027900.1	rhomboid domain containing 1 (RHBDD1)	RHBDD1	FALSE	FALSE	9.54759	64.4279	21.5892	19.163	9.57597	0.00882205	0.999999	5.14003e-05	6.74807	2.26122	2.0071	1.00297	2.98426	TRUE	FALSE	TRUE
NM_170678.1	integrin beta 1 binding protein 3 (ITGB1BP3)	NMRK2	FALSE	FALSE	7.3341	49.473	30.6689	14.7149	13.6033	0.188029	0.999999	0.327305	6.74561	4.18168	2.00637	1.8548	1.61313	FALSE	FALSE	FALSE
NM_000638.2	vitronectin (VTN)	VTN	FALSE	FALSE	5.61022	37.8385	15.4612	11.2544	6.85786	0.00878745	0.999999	0.0294401	6.74456	2.75589	2.00605	1.22239	2.44732	TRUE	FALSE	TRUE
NM_022046.3	Kallikrein-14	KLK14	FALSE	FALSE	6.04899	40.7637	17.7506	12.1245	7.87334	0.00692202	0.999999	0.00258162	6.73892	2.93447	2.00438	1.3016	2.29647	TRUE	FALSE	TRUE
BC000601.1	HIG1 domain family, member 1A (HIGD1A)	HIGD1A	FALSE	FALSE	26.5261	178.75	74.8587	53.166	33.2039	0.175932	0.999999	0.0461193	6.73864	2.82208	2.00429	1.25175	2.38782	FALSE	FALSE	FALSE
NM_001079.3	zeta-chain (TCR) associated protein kinase 70kDa (ZAP70), transcript variant 1	ZAP70	FALSE	FALSE	10.1865	68.6367	45.851	20.4148	20.3374	0.0209274	0.803912	0.227358	6.73802	4.50116	2.00411	1.99651	1.49695	TRUE	FALSE	FALSE
NM_013264.2	DEAD (Asp-Glu-Ala-Asp) box polypeptide 25 (DDX25)	DDX25	FALSE	FALSE	5.64652	38.0461	13.0902	11.3162	5.80622	0.0124414	0.999999	0.000145229	6.73798	2.31829	2.00409	1.02828	2.90645	TRUE	FALSE	TRUE
BC041414.1	chromosome 10 open reading frame 72 (C10orf72)	VSTM4	FALSE	FALSE	4.56897	30.7794	9.53033	9.1548	4.22721	0.00506597	0.999999	5.14003e-05	6.73661	2.08588	2.00369	0.9252	3.22963	TRUE	FALSE	TRUE
BC012814.1	zinc finger protein-like 1 (ZFPL1)	ZFPL1	FALSE	FALSE	7.89538	53.1859	22.8136	15.8192	10.1191	0.0658737	0.999999	0.0411779	6.73633	2.88949	2.00361	1.28164	2.33132	FALSE	FALSE	FALSE
BC001083.1	Protein MYLE	DEXI	FALSE	FALSE	8.798	59.2482	28.1656	17.6224	12.493	0.00938947	0.999999	0.0408104	6.73428	3.20136	2.003	1.41998	2.10357	TRUE	FALSE	TRUE
NM_014279.2	olfactomedin 1 (OLFM1), transcript variant 1	OLFM1	FALSE	FALSE	7.85467	52.8822	16.548	15.7289	7.33991	0.00307699	0.999999	0	6.73258	2.10677	2.00249	0.934464	3.1957	TRUE	FALSE	TRUE
NM_001007258.1	SET domain containing 4 (SETD4), transcript variant 2	SETD4	FALSE	FALSE	7.33874	49.3888	21.6063	14.6899	9.58357	0.0315337	0.999999	0.0769975	6.72988	2.94415	2.00169	1.30589	2.28585	TRUE	FALSE	FALSE
NM_016061.1	yippee-like 5 (Drosophila) (YPEL5)	YPEL5	FALSE	FALSE	8.15821	54.8997	23.1473	16.329	10.2671	0.100743	0.999999	0.127359	6.72938	2.8373	2.00154	1.25849	2.37176	FALSE	FALSE	FALSE
BC051835.1	mannosyl (alpha-1,3-)-glycoprotein beta-1,4-N-acetylglucosaminyltransferase, isozyme B (MGAT4B)	MGAT4B	FALSE	FALSE	5.15023	34.6559	9.1413	10.3078	4.05466	0.0180834	0.999999	5.14003e-05	6.72901	1.77493	2.00143	0.787277	3.79114	TRUE	FALSE	TRUE
NM_017411.2	survival of motor neuron 2, centromeric (SMN2), transcript variant d	SMN2	FALSE	FALSE	10.0745	67.7906	40.7967	20.1631	18.0955	0.37721	0.973176	0.52507	6.72896	4.04952	2.00141	1.79618	1.66167	FALSE	FALSE	FALSE
NM_152716.1	FLJ36874 protein (FLJ36874)	PATL1	FALSE	FALSE	27.3023	183.695	89.3694	54.6371	39.6401	0.0196992	0.999999	0.0492253	6.72821	3.27333	2.00119	1.4519	2.05546	TRUE	FALSE	TRUE
NM_001240.2	cyclin T1 (CCNT1)	CCNT1	FALSE	FALSE	11.7853	79.2538	33.5293	23.5727	14.8721	0.00216302	0.999999	0.00192684	6.72482	2.84502	2.00018	1.26192	2.36371	TRUE	FALSE	TRUE
NM_002432.1	Myeloid cell nuclear differentiation antigen	MNDA	FALSE	FALSE	10.0352	67.4739	32.8638	20.069	14.5769	0.0956122	0.999999	0.119991	6.7237	3.27484	1.99985	1.45257	2.05314	FALSE	FALSE	FALSE
XM_290936.2	Kinesin-like protein KIF26B	KIF26B	FALSE	FALSE	9.02413	60.6619	26.2775	18.0428	11.6555	0.0118579	0.999999	0.00418526	6.72219	2.91192	1.9994	1.29159	2.30851	FALSE	FALSE	FALSE
NM_018145.1	family with sequence similarity 82, member C (FAM82C)	RMDN3	FALSE	FALSE	2.39672	16.1071	12.0575	4.79077	5.34815	0.168881	0.80026	0.55273	6.72047	5.03083	1.99889	2.23144	1.33586	FALSE	FALSE	FALSE
BC045626.1	Homeobox protein PKNOX2	PKNOX2	FALSE	FALSE	25.5264	171.538	50.7209	51.0211	22.4974	0.0929409	0.999999	0.0194818	6.72003	1.987	1.99876	0.88134	3.382	FALSE	FALSE	FALSE
NM_001165.3	baculoviral IAP repeat-containing 3 (BIRC3), transcript variant 1	BIRC3	FALSE	FALSE	7.99913	53.7302	27.2948	15.9811	12.1067	0.0101266	0.999999	0.0096043	6.717	3.41222	1.99786	1.5135	1.96851	FALSE	FALSE	FALSE
BC047411.1	tubulin tyrosine ligase-like family, member 2 (TTLL2)	TTLL2	FALSE	FALSE	9.83327	66.0383	37.1688	19.642	16.4864	0.871858	0.999999	0.376107	6.7158	3.7799	1.9975	1.67659	1.77671	FALSE	FALSE	FALSE
CR542171	CXCL2 (GRO&beta;) Recombinant Human Protein, AA 39-107	CXCL2	FALSE	FALSE	6.10305	40.9172	9.53326	12.1701	4.22851	0.0638895	0.999999	0.00059609	6.70439	1.56205	1.9941	0.692852	4.29205	FALSE	FALSE	FALSE
NM_001006946.1	Syndecan-1	SDC1	FALSE	FALSE	25.116	168.301	39.7216	50.0581	17.6187	0.234141	0.999999	0.054601	6.70094	1.58153	1.99308	0.701492	4.23701	FALSE	FALSE	FALSE
BC018624.1	prickle homolog 4 (Drosophila) (C6orf49)	PRICKLE4	FALSE	FALSE	6.74872	45.1998	18.9468	13.4439	8.40393	0.00576109	0.999999	0.00653935	6.69754	2.80747	1.99207	1.24526	2.38562	FALSE	FALSE	FALSE
BC012883.1	Voltage-dependent anion-selective channel protein 2	VDAC2	FALSE	FALSE	5.21178	34.8828	9.71813	10.3753	4.31051	0.0199338	0.999999	5.14003e-05	6.69308	1.86465	1.99074	0.827072	3.58946	FALSE	FALSE	FALSE
NM_153764.1	potassium inwardly-rectifying channel, subfamily J, member 1 (KCNJ1), transcript variant rom-k2	KCNJ1	FALSE	FALSE	5.76036	38.5507	13.0901	11.4662	5.80615	0.00223559	0.999999	5.14003e-05	6.69241	2.27244	1.99054	1.00795	2.94504	FALSE	FALSE	FALSE
NM_016641.2	membrane interacting protein of RGS16 (MIR16)	GDE1	FALSE	FALSE	11.1972	74.8752	39.3102	22.2703	17.4362	0.080078	0.999999	0.225175	6.68695	3.51071	1.98892	1.55719	1.90473	FALSE	FALSE	FALSE
BC014210.2	arylsulfatase A (ARSA)	ARSA	FALSE	FALSE	4.4048	29.4495	10.1322	8.75925	4.49416	0.00707627	0.999999	0.000644682	6.68577	2.30026	1.98857	1.02029	2.90653	FALSE	FALSE	FALSE
NM_174964.1	CMP-N-acetylneuraminate-beta-1,4-galactoside alpha-2,3-sialyltransferase	ST3GAL3	FALSE	FALSE	3.99867	26.7306	7.75035	7.95057	3.4377	0.0178336	0.999999	0.00171555	6.68488	1.93823	1.9883	0.85971	3.44896	FALSE	FALSE	FALSE
NP_003844.1	IL18RAP / IL1R7 Protein (His Tag)	IL18RAP	FALSE	FALSE	2.14406	14.3312	7.70602	4.26255	3.41803	0.390073	0.949882	0.565473	6.68413	3.59413	1.98808	1.59419	1.85974	FALSE	FALSE	FALSE
NM_024313.1	nucleolar protein 12 (NOL12)	NOL12	FALSE	FALSE	9.67883	64.6847	31.5526	19.2394	13.9953	0.0638895	0.999999	0.163432	6.68311	3.25996	1.98778	1.44597	2.05006	FALSE	FALSE	FALSE
NM_000391.2	Ceroid-lipofuscinosis, neuronal 2, late infantile (Jansky-Bielschowsky disease) (CLN2), mRNA	TPP1	FALSE	FALSE	7.60484	50.7588	17.0406	15.0973	7.55842	0.152886	0.999999	0.00299664	6.67453	2.24076	1.98522	0.993896	2.9787	FALSE	FALSE	FALSE
NM_020529.1	nuclear factor of kappa light polypeptide gene enhancer in B-cells inhibitor, alpha (NFKBIA)	NFKBIA	FALSE	FALSE	7.98355	53.2308	19.9425	15.8326	8.84557	0.0375553	0.999999	0.00723334	6.66756	2.49795	1.98315	1.10797	2.66921	FALSE	FALSE	FALSE
NM_183060.1	cAMP responsive element modulator (CREM), transcript variant 22	CREM	FALSE	FALSE	16.4108	109.283	48.0066	32.5043	21.2935	0.00533164	0.999999	0.00370753	6.65919	2.9253	1.98066	1.29753	2.27642	FALSE	FALSE	FALSE
BC044590.1	ARP3 actin-related protein 3 homolog (yeast) (ACTR3)	ACTR3	FALSE	FALSE	5.86114	39.0151	11.5293	11.6044	5.11388	0.0361555	0.999999	0.00136884	6.65657	1.96708	1.97988	0.872507	3.38398	FALSE	FALSE	FALSE
NM_033348.1	potassium channel, subfamily K, member 7 (KCNK7), transcript variant B	KCNK7	FALSE	FALSE	8.45161	56.2238	22.9277	16.7228	10.1697	0.178937	0.999999	0.142541	6.65243	2.71282	1.97865	1.20328	2.45222	FALSE	FALSE	FALSE
NM_001007071.1	ribosomal protein S6 kinase, 70kDa, polypeptide 2 (RPS6KB2), transcript variant 2	RPS6KB2	FALSE	FALSE	14.8327	98.6123	42.2418	29.3305	18.7365	0.028733	0.999999	0.00867593	6.64829	2.84788	1.97742	1.26319	2.33447	FALSE	FALSE	FALSE
BC006182.1	calmodulin 3 (phosphorylase kinase, delta) (CALM3)	CALM3	FALSE	FALSE	8.60006	57.1576	23.3553	17.0005	10.3593	0.0823558	0.999999	0.0912331	6.64618	2.71572	1.97679	1.20457	2.4473	FALSE	FALSE	FALSE
BC022888.1	xin actin-binding repeat containing 2 (CMYA3)	XIRP2	FALSE	FALSE	7.10607	47.2263	15.2879	14.0467	6.781	0.0364784	0.999999	0.0173676	6.64591	2.15138	1.97671	0.954254	3.08913	FALSE	FALSE	FALSE
NM_002413.3	microsomal glutathione S-transferase 2 (MGST2)	MGST2	FALSE	FALSE	6.21275	41.2644	12.1723	12.2734	5.39909	0.00798798	0.999999	0.000852247	6.64189	1.95925	1.97552	0.869034	3.39001	FALSE	FALSE	FALSE
BC059371.1	RING finger and WD repeat domain-containing protein 3	RFWD3	FALSE	FALSE	5.30377	35.2068	14.8982	10.4717	6.60813	0.0320791	0.999999	0.0121249	6.63807	2.80897	1.97438	1.24593	2.36317	FALSE	FALSE	FALSE
NM_014759.2	phytanoyl-CoA 2-hydroxylase interacting protein (PHYHIP), transcript variant 2	PHYHIP	FALSE	FALSE	5.09011	33.7774	10.1811	10.0465	4.51587	0.00174012	0.999999	5.14003e-05	6.63589	2.00017	1.97373	0.887185	3.31766	FALSE	FALSE	FALSE
NM_152571.2	Uncharacterized protein C9orf163	C9orf163	FALSE	FALSE	4.29049	28.4691	9.97994	8.46764	4.42664	0.0911217	0.999999	0.0213446	6.63539	2.32606	1.97358	1.03173	2.85263	FALSE	FALSE	FALSE
NM_020653.1	Zinc finger protein 287 (ZNF287), mRNA	ZNF287	FALSE	FALSE	5.26655	34.9414	13.3892	10.3927	5.93881	0.0238975	0.999999	0.00235517	6.63459	2.5423	1.97334	1.12765	2.60968	FALSE	FALSE	FALSE
BC037285.2	Complement factor H, mRNA (cDNA clone IMAGE:5267249), complete cds	CFH	FALSE	FALSE	4.46829	29.6365	15.559	8.81488	6.90126	0.0184665	0.999999	0.00831762	6.63264	3.4821	1.97276	1.5445	1.90478	FALSE	FALSE	FALSE
NM_001980.1	Syntaxin-2	STX2	FALSE	FALSE	3.59572	23.8484	7.97436	7.09329	3.53706	0.276448	0.999999	0.0251334	6.63244	2.21774	1.9727	0.983686	2.99063	FALSE	FALSE	FALSE
NM_006459.1	ER lipid raft associated 1 (ERLIN1)	ERLIN1	FALSE	FALSE	4.19864	27.8212	9.78134	8.27494	4.33855	0.00235584	0.999999	5.14003e-05	6.62625	2.32965	1.97086	1.03332	2.84432	FALSE	FALSE	FALSE
NM_024708.2	ankyrin repeat and SOCS box-containing 7 (ASB7), transcript variant 1	ASB7	FALSE	FALSE	6.01941	39.8612	14.1659	11.856	6.28333	0.0125189	0.999999	0.0247142	6.6221	2.35337	1.96963	1.04384	2.81388	FALSE	FALSE	FALSE
BC002955.1	ubiquitin specific peptidase 2 (USP2)	USP2	FALSE	FALSE	22.6184	149.772	78.525	44.547	34.83	0.026076	0.995236	0.0731577	6.62167	3.47173	1.9695	1.5399	1.90731	FALSE	FALSE	FALSE
BC032348.1	kelch-like 6 (Drosophila) (KLHL6)	KLHL6	FALSE	FALSE	3.89249	25.7688	8.47547	7.66449	3.75933	0.00387502	0.999999	5.14003e-05	6.62013	2.17739	1.96904	0.965789	3.0404	FALSE	FALSE	FALSE
NM_005111.4	crystallin, zeta (quinone reductase)-like 1 (CRYZL1)	CRYZL1	FALSE	FALSE	8.38518	55.4683	37.2492	16.4981	16.522	0.325324	0.999999	0.480995	6.61504	4.44226	1.96753	1.97038	1.48912	FALSE	FALSE	FALSE
NM_080416.1	septin 4 (SEPT4), transcript variant 3	SEPT4	FALSE	FALSE	10.2131	67.5439	39.2039	20.0898	17.389	0.0691421	0.999999	0.103189	6.61343	3.83857	1.96705	1.70261	1.72289	FALSE	FALSE	FALSE
NM_018107.2	RNA binding motif protein 23 (RBM23), transcript variant 2	RBM23	FALSE	FALSE	21.533	142.381	65.091	42.3486	28.8713	0.0493668	0.999999	0.068214	6.61221	3.02285	1.96669	1.3408	2.18741	FALSE	FALSE	FALSE
NM_017824.2	membrane-associated ring finger (C3HC4) 5 (MARCH5)	MARCH5	FALSE	FALSE	6.00474	39.6941	10.3906	11.8063	4.60878	0.178393	0.999999	0.00042151	6.61046	1.7304	1.96617	0.767524	3.8202	FALSE	FALSE	FALSE
NM_017986.2	G protein-coupled receptor 172B (GPR172B), transcript variant 2	SLC52A1	FALSE	FALSE	4.70539	31.094	9.74782	9.24839	4.32368	0.0392798	0.999999	0.0197891	6.60818	2.07163	1.96549	0.91888	3.18985	FALSE	FALSE	FALSE
BC068094.1	SH3 domain and tetratricopeptide repeats 1 (SH3TC1)	SH3TC1	FALSE	FALSE	14.7991	97.7695	47.5412	29.0798	21.0871	0.0313006	0.999999	0.0422069	6.60643	3.21243	1.96497	1.42488	2.05652	FALSE	FALSE	FALSE
BC003400.1	TAF9 RNA polymerase II, TATA box binding protein (TBP)-associated factor, 32kDa (TAF9)	TAF9	FALSE	FALSE	4.34754	28.7201	7.37614	8.5423	3.27171	0.120806	0.999999	0.00894378	6.60606	1.69662	1.96486	0.752543	3.89365	FALSE	FALSE	FALSE
BC007654.1	NIF3 NGG1 interacting factor 3-like 1 (S. pombe) (NIF3L1)	NIF3L1	FALSE	FALSE	1.07794	7.114	18.7405	2.11594	8.31244	0.27798	0.435196	0.273448	6.5996	17.3855	1.96294	7.71139	0.379604	FALSE	FALSE	FALSE
BC096303.1	Ribosomal protein S6 kinase alpha-3	RPS6KA3	FALSE	FALSE	16.5814	109.413	70.2637	32.5429	31.1657	0.0296009	0.606203	0.491421	6.59852	4.2375	1.96262	1.87956	1.55717	FALSE	FALSE	FALSE
NM_024038.2	chromosome 19 open reading frame 43 (C19orf43)	C19orf43	FALSE	FALSE	14.9188	98.3804	63.8023	29.2616	28.2998	0.0857703	0.999999	0.175461	6.59438	4.27663	1.96138	1.89691	1.54196	FALSE	FALSE	FALSE
BC043269.2	chromosome 7 open reading frame 31 (C7orf31)	C7orf31	FALSE	FALSE	8.09865	53.3791	16.5088	15.8767	7.32255	0.0193269	0.999999	0.00144759	6.59111	2.03847	1.96041	0.90417	3.23336	FALSE	FALSE	FALSE
NM_001353.3	aldo-keto reductase family 1, member C1 (dihydrodiol dehydrogenase 1; 20-alpha (3-alpha)-hydroxysteroid dehydrogenase) (AKR1C1)	AKR1C1	FALSE	FALSE	8.9267	58.8302	22.5371	17.498	9.9964	0.38076	0.999999	0.151655	6.59036	2.52468	1.96019	1.11983	2.61038	FALSE	FALSE	FALSE
BC015586.2	laminin, gamma 1 (formerly LAMB2) (LAMC1)	LAMC1	FALSE	TRUE	8.55774	56.3925	20.181	16.773	8.95135	0.012067	0.999999	0.0111936	6.58965	2.35821	1.95998	1.04599	2.79434	FALSE	FALSE	FALSE
BC022043.1	chromosome 7 open reading frame 36 (C7orf36)	YAE1D1	FALSE	FALSE	1.71299	11.2841	15.8629	3.35626	7.03604	0.543683	0.850792	0.526361	6.58738	9.26035	1.9593	4.10746	0.711353	FALSE	FALSE	FALSE
NM_001001653.1	mediator of RNA polymerase II transcription, subunit 8 homolog (S. cerevisiae) (MED8), transcript variant 4	MED8	FALSE	FALSE	12.401	81.6553	35.7864	24.2869	15.8732	0.0777715	0.999999	0.00865712	6.58455	2.88576	1.95846	1.27999	2.28174	FALSE	FALSE	FALSE
BC096341.1	Natriuretic peptide receptor B/guanylate cyclase B (atrionatriuretic peptide receptor B), mRNA (cDNA clone MGC:117031 IMAGE:40008585), complete cds	NPR2	FALSE	FALSE	2.60436	17.1481	4.71731	5.10041	2.09238	0.00589751	0.999999	0	6.5844	1.81131	1.95842	0.803415	3.63515	FALSE	FALSE	FALSE
NM_024076.1	potassium channel tetramerisation domain containing 15 (KCTD15)	KCTD15	FALSE	FALSE	15.6873	103.249	39.1625	30.7095	17.3707	0.172114	0.999999	0.00370753	6.58168	2.49645	1.95761	1.10731	2.63641	FALSE	FALSE	FALSE
NM_001018160.1	NEDD8-activating enzyme E1 regulatory subunit	NAE1	FALSE	FALSE	12.9115	84.9778	19.9064	25.2752	8.82955	0.0354908	0.999999	0.00363656	6.58159	1.54176	1.95758	0.683854	4.26887	FALSE	FALSE	FALSE
BC015557.2	CD68 molecule (CD68)	CD68	FALSE	FALSE	14.6344	96.3136	34.9281	28.6468	15.4925	0.00158812	0.999999	0.00217009	6.58132	2.38671	1.9575	1.05864	2.75748	FALSE	FALSE	FALSE
BC001426.1	ubiquinol-cytochrome c reductase hinge protein (UQCRH)	UQCRH	FALSE	FALSE	9.46287	62.2372	20.4783	18.5114	9.0832	0.695261	0.999999	0.131866	6.57699	2.16406	1.95621	0.959879	3.03918	FALSE	FALSE	FALSE
NM_006571.2	dynactin 6 (DCTN6)	DCTN6	FALSE	FALSE	14.4928	95.3065	6.6024	28.3473	2.92852	0.435092	0.999999	0.0254256	6.57614	0.455565	1.95596	0.202068	14.4351	FALSE	FALSE	FALSE
NM_001007097.1	neurotrophic tyrosine kinase, receptor, type 2 (NTRK2), transcript variant b	NTRK2	FALSE	TRUE	9.93679	65.3155	25.8275	19.427	11.4559	0.0166749	0.999999	0.00545688	6.5731	2.59918	1.95506	1.15288	2.52891	FALSE	FALSE	FALSE
NM_005518.1	3-hydroxy-3-methylglutaryl-Coenzyme A synthase 2 (mitochondrial) (HMGCS2)	HMGCS2	FALSE	FALSE	10.9812	72.1567	42.2251	21.4618	18.7291	0.450786	0.999999	0.412324	6.57093	3.84522	1.95441	1.70556	1.70886	FALSE	FALSE	FALSE
BC006818.1	1-acylglycerol-3-phosphate O-acyltransferase 1 (lysophosphatidic acid acyltransferase, alpha), mRNA (cDNA clone IMAGE:3448169), complete cds.	AGPAT1	FALSE	FALSE	13.7589	90.3864	35.4558	26.8839	15.7266	0.191338	0.999999	0.14609	6.56931	2.57694	1.95393	1.14301	2.54927	FALSE	FALSE	FALSE
NM_020666.2	CDC-like kinase 4 (CLK4)	CLK4	FALSE	FALSE	8.24194	54.1009	24.6091	16.0914	10.9155	0.0149967	0.999999	0.0127545	6.5641	2.98584	1.95238	1.32438	2.19841	FALSE	FALSE	FALSE
NM_003223.1	transcription factor AP-4 (activating enhancer binding protein 4) (TFAP4)	TFAP4	FALSE	FALSE	26.5493	174.249	51.4778	51.8273	22.8332	0.0181889	0.999999	0.0242868	6.56322	1.93895	1.95212	0.860029	3.38493	FALSE	FALSE	FALSE
BC021861.1	hypothetical LOC554202 (LOC554202)	MIR31HG	FALSE	FALSE	7.16072	46.9539	20.8596	13.9656	9.25236	0.0486104	0.999999	0.0280856	6.55715	2.91306	1.95031	1.2921	2.25095	FALSE	FALSE	FALSE
XM_003960444.1	Hypothetical protein MGC21881 (MGC21881), mRNA	GLIDR	FALSE	FALSE	11.3968	74.7089	30.7637	22.2209	13.6453	0.0150157	0.999999	0.00796016	6.55525	2.69932	1.94975	1.1973	2.42848	FALSE	FALSE	FALSE
NM_004328.2	Mitochondrial chaperone BCS1	BCS1L	FALSE	FALSE	5.71358	37.4428	11.2332	11.1367	4.98251	0.067525	0.999999	0.00177799	6.55331	1.96605	1.94917	0.872048	3.33324	FALSE	FALSE	FALSE
NM_177924.1	N-acylsphingosine amidohydrolase (acid ceramidase) 1 (ASAH1), transcript variant 1	ASAH1	FALSE	TRUE	2.81039	18.4145	12.2333	5.47707	5.42612	0.754586	0.999999	0.587853	6.5523	4.35289	1.94887	1.93074	1.50528	FALSE	FALSE	FALSE
BC006105.1	chromosome 6 open reading frame 134 (C6orf134)	ATAT1	FALSE	FALSE	23.004	150.711	107.608	44.8265	47.73	0.042644	0.999999	0.130283	6.55151	4.67779	1.94863	2.07485	1.40056	FALSE	FALSE	FALSE
NM_033199.1	Urocortin-2	UCN2	FALSE	FALSE	10.7013	70.1026	39.6525	20.8508	17.588	0.496713	0.999999	0.145123	6.55082	3.70538	1.94843	1.64353	1.76792	FALSE	FALSE	FALSE
BC065534.1	ATG9 autophagy related 9 homolog A (S. cerevisiae) (ATG9A)	ATG9A	FALSE	FALSE	6.87533	45.0047	16.319	13.3859	7.23834	0.040977	0.999999	0.00707535	6.54583	2.37356	1.94694	1.0528	2.75782	FALSE	FALSE	FALSE
NM_004064.2	cyclin-dependent kinase inhibitor 1B (p27, Kip1) (CDKN1B)	CDKN1B	TRUE	FALSE	14.2276	93.0775	48.327	27.6843	21.4356	0.285809	0.999999	0.228	6.54206	3.39672	1.94582	1.50663	1.92599	FALSE	FALSE	FALSE
NM_006215.2	serpin peptidase inhibitor, clade A (alpha-1 antiproteinase, antitrypsin), member 4 (SERPINA4)	SERPINA4	FALSE	FALSE	9.27211	60.6556	20.3999	18.0409	9.04844	0.00579203	0.999999	0.000644682	6.54172	2.20013	1.94572	0.975877	2.97333	FALSE	FALSE	FALSE
NM_001007792.1	neurotrophic tyrosine kinase, receptor, type 1 (NTRK1), transcript variant 3	LYN	FALSE	FALSE	14.2758	93.3862	40.4057	27.7761	17.9221	0.338755	0.999999	0.0931532	6.54157	2.83036	1.94568	1.25542	2.31122	FALSE	FALSE	FALSE
NM_002746.1	mitogen-activated protein kinase 3	MAPK3	FALSE	FALSE	8.69184	56.7974	21.8415	16.8934	9.68788	0.0615168	0.999999	0.122095	6.53457	2.51288	1.94359	1.1146	2.60043	FALSE	FALSE	FALSE
BC025340.1	Hypothetical protein MGC39372, mRNA (cDNA clone MGC:39372 IMAGE:5089466), complete cds	SERPINB9P1	FALSE	FALSE	11.0722	72.3481	36.9121	21.5187	16.3725	0.24881	0.999999	0.326421	6.53419	3.33375	1.94348	1.4787	1.96001	FALSE	FALSE	FALSE
BC000961.2	degenerative spermatocyte homolog 1, lipid desaturase (Drosophila) (DEGS1)	DEGS1	FALSE	FALSE	5.37954	35.1486	9.22796	10.4544	4.0931	0.0312823	0.999999	0.0050128	6.53376	1.71538	1.94335	0.760863	3.80893	FALSE	FALSE	FALSE
NM_003978.2	proline-serine-threonine phosphatase interacting protein 1 (PSTPIP1)	PSTPIP1	FALSE	FALSE	11.3434	74.0593	48.018	22.0277	21.2986	0.0374157	0.630168	0.34757	6.52887	4.23313	1.9419	1.87762	1.54232	FALSE	FALSE	FALSE
NM_033313.1	CDC14 cell division cycle 14 homolog A (S. cerevisiae) (CDC14A), transcript variant 3	CDC14A	FALSE	FALSE	17.599	114.86	45.6209	34.1631	20.2353	0.0254188	0.999999	0.00278095	6.52649	2.59224	1.94119	1.1498	2.51771	FALSE	FALSE	FALSE
NM_030780.2	solute carrier family 25, member 32 (SLC25A32)	SLC25A32	FALSE	FALSE	4.23002	27.5862	8.43449	8.20504	3.74115	0.036685	0.999999	0.0024718	6.52152	1.99396	1.93971	0.884427	3.27064	FALSE	FALSE	FALSE
NM_172016.1	tripartite motif-containing 39 (TRIM39), transcript variant 2	TRIM39	FALSE	FALSE	14.032	91.5004	25.3936	27.2152	11.2634	0.0906005	0.999999	0.00694101	6.52085	1.8097	1.93951	0.802698	3.60328	FALSE	FALSE	FALSE
NM_005240.1	ets variant gene 3 (ETV3)	ETV3	FALSE	FALSE	6.02547	39.2885	12.5992	11.6857	5.58841	0.00439837	0.999999	5.14003e-05	6.5204	2.09098	1.93938	0.927464	3.11834	FALSE	FALSE	FALSE
BC045606.1	nidogen 1 (NID1)	NID1	FALSE	FALSE	8.04263	52.377	14.8686	15.5786	6.59502	0.00779047	0.999999	0.00042151	6.51242	1.84872	1.93701	0.820008	3.52266	FALSE	FALSE	FALSE
NM_177938.1	hypoxia-inducible factor prolyl 4-hydroxylase (PH-4), transcript variant 3	P4HTM	FALSE	FALSE	20.389	132.767	49.2371	39.4893	21.8393	0.507357	0.999999	0.0396616	6.51171	2.41489	1.9368	1.07113	2.69649	FALSE	FALSE	FALSE
BC008913.2	Thioredoxin domain containing 12 (endoplasmic reticulum), mRNA (cDNA clone MGC:15395 IMAGE:3659407), complete cds	TXNDC12	FALSE	FALSE	6.36105	41.414	13.6386	12.3179	6.04945	0.016704	0.999999	0.00075001	6.51056	2.14408	1.93645	0.951015	3.03652	FALSE	FALSE	FALSE
NM_000184.1	hemoglobin, gamma G (HBG2)	HBG2	FALSE	FALSE	5.42394	35.308	17.5707	10.5017	7.79356	0.0387599	0.999999	0.0264294	6.50966	3.23948	1.93618	1.43688	2.00948	FALSE	FALSE	FALSE
BC036327.1	phospholipase D family, member 3 (PLD3)	PLD3	FALSE	FALSE	8.21199	53.4406	16.5651	15.895	7.34752	0.0360341	0.999999	0.00917639	6.50763	2.01719	1.93558	0.894731	3.22609	FALSE	FALSE	FALSE
NM_002230.1	Junction plakoglobin	JUP	TRUE	FALSE	17.8746	116.294	58.3377	34.5897	25.8759	0.104553	0.944666	0.228884	6.5061	3.26371	1.93513	1.44763	1.99347	FALSE	FALSE	FALSE
NM_174889.2	NDUFA12-like (NDUFA12L)	NDUFAF2	FALSE	FALSE	16.3702	106.427	32.5558	31.6549	14.4402	0.080078	0.999999	0.00465518	6.50125	1.98872	1.93369	0.882104	3.26906	FALSE	FALSE	FALSE
BC001045.1	RUN and SH3 domain containing 1 (RUSC1)	RUSC1	FALSE	FALSE	8.30539	53.9342	30.3015	16.0418	13.4403	0.152404	0.999999	0.133371	6.49388	3.64841	1.93149	1.61827	1.77992	FALSE	FALSE	FALSE
NM_005675.2	DiGeorge syndrome critical region gene 6 (DGCR6)	DGCR6	FALSE	FALSE	10.2142	66.3149	37.7592	19.7242	16.7482	0.115347	0.999999	0.174522	6.49242	3.69673	1.93106	1.6397	1.75626	FALSE	FALSE	FALSE
NM_139012.1	mitogen-activated protein kinase 14 (MAPK14), transcript variant 2	MAPK14	FALSE	FALSE	6.03712	39.1869	18.3275	11.6555	8.12921	0.0310357	0.875459	0.212246	6.491	3.0358	1.93064	1.34654	2.13815	FALSE	FALSE	FALSE
NM_004374.2	Cytochrome c oxidase polypeptide VIc	COX6C	FALSE	FALSE	6.45102	41.8685	13.3123	12.4531	5.90471	0.107359	0.999999	0.0107247	6.49022	2.06359	1.9304	0.915315	3.14511	FALSE	FALSE	FALSE
NM_001384.2	DPH2 homolog (S. cerevisiae) (DPH2), transcript variant 1	DPH2	FALSE	TRUE	5.09025	33.0219	13.9554	9.82178	6.18996	0.00117165	0.999999	0.00123578	6.48728	2.74159	1.92953	1.21604	2.36624	FALSE	FALSE	FALSE
BC000232.1	Receptor expression-enhancing protein 5	REEP5	FALSE	FALSE	7.54325	48.9014	22.4033	14.5449	9.93706	0.735072	0.999999	0.0743112	6.48281	2.96998	1.9282	1.31735	2.18278	FALSE	FALSE	FALSE
NP_001183.2	TNFRSF17 / BCMA / CD269 Protein	TNFRSF17	FALSE	FALSE	3.42717	22.2018	11.3925	6.60356	5.0532	0.0562243	0.999999	0.0511863	6.47818	3.32418	1.92682	1.47445	1.94881	FALSE	FALSE	FALSE
NM_004782.2	synaptosomal-associated protein, 29kDa (SNAP29)	SNAP29	FALSE	FALSE	11.5723	74.9644	28.1153	22.2969	12.4707	0.0911336	0.999999	0.00881323	6.47794	2.42954	1.92675	1.07763	2.66632	FALSE	FALSE	FALSE
NM_145183.1	PYD and CARD domain containing (PYCARD), transcript variant 3	PYCARD	FALSE	FALSE	3.22442	20.8831	5.44902	6.21132	2.41693	0.00343752	0.999999	0	6.47655	1.68992	1.92634	0.749572	3.83245	FALSE	FALSE	FALSE
BC036817.1	FK506 binding protein 6, 36kDa (FKBP6)	FKBP6	FALSE	FALSE	10.1879	65.9815	39.9478	19.6251	17.719	0.156833	0.999999	0.431644	6.47643	3.92108	1.9263	1.73921	1.6517	FALSE	FALSE	FALSE
NM_054012.1	argininosuccinate synthetase 1 (ASS1), transcript variant 2	ASS1	FALSE	FALSE	17.5269	113.474	48.7178	33.7509	21.6089	0.0283052	0.999999	0.047494	6.4743	2.7796	1.92567	1.2329	2.32922	FALSE	FALSE	FALSE
NM_178154.1	fucosyltransferase 8 (alpha (1,6) fucosyltransferase) (FUT8), transcript variant 2	FUT8	FALSE	FALSE	7.92946	51.3332	23.725	15.2682	10.5233	0.00659543	0.999999	0.00820197	6.47374	2.99201	1.9255	1.32712	2.16368	FALSE	FALSE	FALSE
BC002466.1	A-Raf proto-oncogene serine/threonine-protein kinase	ARAF	FALSE	FALSE	15.1047	97.733	46.9995	29.069	20.8468	0.250607	0.999999	0.0402614	6.47038	3.11159	1.9245	1.38016	2.07945	FALSE	FALSE	FALSE
NM_003355.2	Uncoupling protein 2 (mitochondrial, proton carrier) (UCP2), nuclear gene encoding mitochondrial protein, mRNA	UCP2	FALSE	FALSE	3.61917	23.4109	8.05429	6.96318	3.57251	0.081227	0.999999	0.00395125	6.46858	2.22545	1.92397	0.987107	2.90664	FALSE	FALSE	FALSE
NM_003795.1	sorting nexin 3 (SNX3)	SNX3	FALSE	FALSE	11.4193	73.7806	33.3613	21.9448	14.7975	0.413967	0.999999	0.0420919	6.46102	2.92148	1.92172	1.29583	2.21156	FALSE	FALSE	FALSE
NM_002055.1	glial fibrillary acidic protein (GFAP)	GFAP	FALSE	TRUE	12.0079	77.5748	34.4913	23.0733	15.2988	0.202295	0.999999	0.0665479	6.46032	2.87239	1.92151	1.27406	2.24911	FALSE	FALSE	FALSE
BC007022.1	serum amyloid A1 (SAA1)	SAA1	FALSE	FALSE	5.05392	32.6437	9.33899	9.70932	4.14234	0.0313707	0.999999	5.14003e-05	6.4591	1.84787	1.92115	0.81963	3.49543	FALSE	FALSE	FALSE
NM_001225.2	caspase 4, apoptosis-related cysteine peptidase (CASP4), transcript variant alpha	CASP4	FALSE	FALSE	6.02437	38.8789	11.1826	11.5639	4.96011	0.099952	0.999999	0.00150426	6.45361	1.85624	1.91952	0.82334	3.47672	FALSE	FALSE	FALSE
NP_001138.1	ANG2 / Angiopoietin-2 Protein (His Tag)	ANGPT2	FALSE	FALSE	2.7491	17.7322	14.6374	5.27413	6.49248	0.871858	0.999999	0.502573	6.45017	5.32443	1.91849	2.36167	1.21143	FALSE	FALSE	FALSE
BC020203.1	glycerophosphodiester phosphodiesterase domain containing 5 (GDPD5)	GDPD5	FALSE	FALSE	30.5064	196.689	104.221	58.5017	46.2275	0.0891467	0.999999	0.161279	6.44746	3.41635	1.91768	1.51534	1.88723	FALSE	FALSE	FALSE
BC029609.1	hypothetical LOC554206	LOC554206	FALSE	FALSE	8.31919	53.6366	19.0791	15.9533	8.4626	0.0157665	0.999999	0.00164031	6.44734	2.29338	1.91765	1.01724	2.81128	FALSE	FALSE	FALSE
NM_016505.2	zinc finger, CCHC domain containing 17 (ZCCHC17)	ZCCHC17	FALSE	FALSE	8.47983	54.655	23.5834	16.2562	10.4605	0.0339875	0.846955	0.135263	6.44529	2.78111	1.91704	1.23357	2.31752	FALSE	FALSE	FALSE
BC056408.1	dihydropyrimidinase-like 2 (DPYSL2)	DPYSL2	TRUE	TRUE	41.9239	270.21	149.557	80.3692	66.3365	0.105119	0.999999	0.0426627	6.44524	3.56734	1.91702	1.58231	1.80674	FALSE	FALSE	FALSE
NM_203284.1	recombination signal binding protein for immunoglobulin kappa J region (RBPJ), transcript variant 4	RBPJ	FALSE	FALSE	32.4648	209.145	84.6132	62.2067	37.5305	0.511386	0.999999	0.0741161	6.44222	2.60631	1.91613	1.15604	2.47178	FALSE	FALSE	FALSE
BC032852.2	melanoma antigen family B, 4 (MAGEB4)	MAGEB4	FALSE	FALSE	21.052	135.485	7.65427	40.2976	3.39508	0.0124893	0.999999	0	6.4357	0.363588	1.91419	0.161271	17.7005	FALSE	FALSE	FALSE
NM_001870.1	Carboxypeptidase A3 (mast cell) (CPA3), mRNA	CPA3	FALSE	FALSE	2.63714	16.9602	5.36666	5.04451	2.3804	0.0180834	0.999999	0.0024718	6.43127	2.03503	1.91287	0.902645	3.16028	FALSE	FALSE	FALSE
BC020577.1	carbonic anhydrase X (CA10)	CA10	FALSE	FALSE	4.2651	27.4267	9.65325	8.15759	4.28174	0.0240615	0.999999	0.00538595	6.43049	2.26331	1.91264	1.0039	2.84118	FALSE	FALSE	FALSE
BC001030.1	phosphatidylinositol glycan anchor biosynthesis, class O (PIGO)	PIGO	FALSE	FALSE	9.98086	64.1579	30.1612	19.0827	13.3781	0.00727366	0.925187	0.0356953	6.42809	3.0219	1.91192	1.34038	2.12717	FALSE	FALSE	FALSE
BC051291.1	retinol dehydrogenase 11 (all-trans/9-cis/11-cis) (RDH11)	RDH11	FALSE	FALSE	4.09939	26.348	7.68018	7.83677	3.40657	0.0614528	0.999999	0.00270356	6.42731	1.87349	1.91169	0.830995	3.43065	FALSE	FALSE	FALSE
Invitrogen: PM_2146, JO-1	JO-1	HARS	FALSE	FALSE	4.74856	30.5056	10.7509	9.07336	4.76859	0.0406381	0.999999	0.00370753	6.42418	2.26403	1.91076	1.00422	2.8375	FALSE	FALSE	FALSE
BC007646.1	exonuclease NEF-sp (LOC81691)	LOC81691	FALSE	FALSE	9.39246	60.3346	24.486	17.9455	10.8609	0.00285528	0.999999	0.00075001	6.42373	2.60698	1.91063	1.15634	2.46404	FALSE	FALSE	FALSE
NM_031300.2	MAX dimerization protein 3 (MXD3)	MXD3	FALSE	FALSE	3.55574	22.8337	8.23681	6.79149	3.65347	0.00722952	0.999999	0.000644682	6.42165	2.31648	1.91001	1.02748	2.77216	FALSE	FALSE	FALSE
NM_002503.2	nuclear factor of kappa light polypeptide gene enhancer in B-cells inhibitor, beta (NFKBIB), transcript variant 1	NFKBIB	FALSE	FALSE	10.3389	66.3681	45.294	19.74	20.0903	0.0805145	0.887403	0.369875	6.41928	4.38094	1.9093	1.94318	1.46527	FALSE	FALSE	FALSE
Invitrogen: PM_3502, myeloperoxidase_IV	myeloperoxidase_IV	MPO	FALSE	TRUE	3.91845	25.153	10.5076	7.48131	4.66068	0.00223559	0.999999	0.00032916	6.41912	2.68157	1.90926	1.18942	2.39379	FALSE	FALSE	FALSE
NM_181462.1	mitochondrial ribosomal protein L55 (MRPL55), nuclear gene encoding mitochondrial protein, transcript variant 4	MRPL55	FALSE	FALSE	9.8603	63.2921	23.4019	18.8251	10.38	0.0323396	0.999999	0.0870445	6.41889	2.37335	1.90919	1.05271	2.70457	FALSE	FALSE	FALSE
NM_006212.1	6-phosphofructo-2-kinase/fructose-2,6-biphosphatase 2 (PFKFB2), transcript variant 1	PFKFB2	FALSE	FALSE	19.6349	126	68.0965	37.4765	30.2044	0.0702105	0.818854	0.387411	6.41712	3.46813	1.90866	1.5383	1.85031	FALSE	FALSE	FALSE
NM_178585.1	WD repeat and FYVE domain containing 3 (WDFY3), transcript variant 3	WDFY3	TRUE	FALSE	11.132	71.4207	27.7302	21.2428	12.2998	0.210318	0.999999	0.0408136	6.41581	2.49104	1.90827	1.10491	2.57555	FALSE	FALSE	FALSE
NM_032316.1	nicolin 1 (NICN1)	NICN1	FALSE	FALSE	13.1793	84.5315	26.5546	25.1424	11.7784	0.609473	0.999999	0.0839806	6.41396	2.01487	1.90772	0.893703	3.18331	FALSE	FALSE	FALSE
NM_003862.1	Fibroblast growth factor 18	FGF18	FALSE	FALSE	6.35397	40.75	15.1561	12.1204	6.72254	0.00196593	0.999999	0.00150426	6.41331	2.38529	1.90753	1.05801	2.68869	FALSE	FALSE	FALSE
NM_000594.2	tumor necrosis factor (TNF superfamily, member 2) (TNF); see catalog number for detailed information on wild-type or point mutant status	TNF	FALSE	FALSE	4.24192	27.1833	6.5135	8.08519	2.88909	0.00324228	0.999999	0	6.40825	1.53551	1.90602	0.68108	4.17337	FALSE	FALSE	FALSE
NM_145899.1	high mobility group AT-hook 1 (HMGA1), transcript variant 1	HMGA1	FALSE	FALSE	9.71784	62.2605	33.3229	18.5183	14.7805	0.00512662	0.754538	0.012868	6.40683	3.42904	1.9056	1.52096	1.8684	FALSE	FALSE	FALSE
NM_019107.3	UPF0556 protein C19orf10	MYDGF	FALSE	FALSE	9.69563	62.112	34.6013	18.4741	15.3475	0.00596286	0.788666	0.0214846	6.40618	3.56875	1.90541	1.58293	1.79508	FALSE	FALSE	FALSE
BC047690.1	Ras-related protein M-Ras	MRAS	FALSE	FALSE	6.37746	40.8392	12.5389	12.1469	5.56169	0.0215663	0.999999	0.00156762	6.40368	1.96613	1.90466	0.872085	3.25699	FALSE	FALSE	FALSE
NM_005197.2	Forkhead box protein N3	FOXN3	FALSE	FALSE	14.0542	89.9965	54.763	26.7679	24.2904	0.0287974	0.581095	0.339462	6.40353	3.89656	1.90462	1.72833	1.64338	FALSE	FALSE	FALSE
NM_138461.1	transmembrane 4 L six family member 19 (TM4SF19)	TM4SF19	FALSE	FALSE	5.5631	35.6234	11.7606	10.5956	5.21645	0.0232228	0.999999	0.00169308	6.40353	2.11404	1.90462	0.937689	3.02905	FALSE	FALSE	FALSE
BC020905.1	Anterior pharynx defective 1B-like, mRNA (cDNA clone MGC:24164 IMAGE:4720647), complete cds	APH1B	FALSE	FALSE	5.41648	34.679	10.528	10.3147	4.66971	0.240634	0.999999	0.00176898	6.4025	1.94369	1.90431	0.862131	3.29399	FALSE	FALSE	FALSE
BC017716.1	secreted and transmembrane 1 (SECTM1)	SECTM1	FALSE	FALSE	5.93032	37.9599	12.9352	11.2905	5.73746	0.262493	0.999999	0.0362954	6.401	2.1812	1.90387	0.96748	2.93462	FALSE	FALSE	FALSE
NM_030588.1	ATP-dependent RNA helicase A	DHX9	FALSE	FALSE	6.69038	42.7999	15.4423	12.7301	6.84949	0.0142298	0.999999	0.00282983	6.39724	2.30813	1.90275	1.02378	2.7716	FALSE	FALSE	FALSE
Invitrogen: PM_2149, thyroglobulin	thyroglobulin	TG	FALSE	FALSE	3.12912	20.0169	26.7751	5.95367	11.8762	0.370197	0.613967	0.498742	6.39697	8.55675	1.90267	3.79538	0.747594	FALSE	FALSE	FALSE
Invitrogen: Fibronectin_Native, CAT_PHE0023	Fibronectin Human Protein, Nati-Ve	FN1	FALSE	FALSE	4.59881	29.3927	6.60886	8.74234	2.93139	0.182563	0.999999	0.00145647	6.39137	1.43708	1.901	0.637423	4.44746	FALSE	FALSE	FALSE
BC040036.1	chromosome 17 open reading frame 49 (C17orf49)	C17orf49	FALSE	FALSE	6.45324	41.2288	19.0552	12.2628	8.45202	0.138339	0.999999	0.123106	6.38885	2.95282	1.90025	1.30973	2.16365	FALSE	FALSE	FALSE
BC050387.1	ankyrin repeat and sterile alpha motif domain containing 3 (ANKS3)	ANKS3	FALSE	FALSE	8.82697	56.3688	33.7959	16.7659	14.9903	0.467665	0.999999	0.210074	6.38598	3.82871	1.8994	1.69824	1.66792	FALSE	FALSE	FALSE
BC009010.1	Uncharacterized protein C6orf142 homolog	MLIP	FALSE	TRUE	72.2837	461.575	9.01441	137.288	3.99838	0.118293	0.999999	0	6.3856	0.124709	1.89929	0.055315	51.2042	FALSE	FALSE	FALSE
NM_020200.3	phosphoribosyl transferase domain containing 1 (PRTFDC1)	PRTFDC1	FALSE	FALSE	6.30395	40.2517	13.6501	11.9722	6.05455	0.272229	0.999999	0.0855584	6.38516	2.16532	1.89915	0.960437	2.94882	FALSE	FALSE	FALSE
BC028199.1	CD300 molecule-like family member f (CD300LF)	CD300LF	FALSE	FALSE	14.8027	94.5123	40.3837	28.1111	17.9123	0.0735674	0.999999	0.0200392	6.38482	2.72814	1.89905	1.21007	2.34036	FALSE	FALSE	FALSE
BC040902.1	PRAME family member 2 (PRAMEF2)	PRAMEF2	FALSE	FALSE	8.74973	55.8539	27.8573	16.6128	12.3562	0.484704	0.999999	0.212007	6.3835	3.18379	1.89866	1.41218	2.005	FALSE	FALSE	FALSE
BC006273.1	T-cell activation NFKB-like protein (TA-NFKBH)	NFKBID	FALSE	FALSE	8.65864	55.2688	28.3036	16.4387	12.5542	0.0783587	0.999999	0.0244895	6.38308	3.26883	1.89854	1.4499	1.95271	FALSE	FALSE	FALSE
BC002863.2	chromosome 9 open reading frame 156 (C9orf156)	TRMO	FALSE	FALSE	25.2504	161.172	137.591	47.938	61.0288	0.0205685	0.568744	0.389818	6.38296	5.44904	1.8985	2.41694	1.17139	FALSE	FALSE	FALSE
BC007835.1	Serine/threonine-protein kinase 40	STK40	FALSE	FALSE	4.4367	28.3068	9.07303	8.41936	4.02438	0.0137229	0.999999	5.14003e-05	6.38014	2.04499	1.89766	0.907065	3.11988	FALSE	FALSE	FALSE
NM_012113.1	carbonic anhydrase XIV (CA14)	CA14	FALSE	FALSE	4.27945	27.2907	7.49137	8.11716	3.32283	0.229299	0.999999	0.012868	6.37716	1.75055	1.89678	0.776461	3.64296	FALSE	FALSE	FALSE
BC047303.1	chromosome 6 open reading frame 134 (C6orf134)	ATAT1	FALSE	FALSE	11.7629	74.9747	26.3196	22.2999	11.6741	0.274716	0.999999	0.049306	6.37383	2.23751	1.89578	0.992454	2.84863	FALSE	FALSE	FALSE
BC024256.1	F-box and leucine-rich repeat protein 18 (FBXL18)	FBXL18	FALSE	FALSE	6.00048	38.2457	12.7454	11.3755	5.65326	0.0299998	0.999999	0.00292357	6.37377	2.12406	1.89577	0.942134	3.00075	FALSE	FALSE	FALSE
NM_015609.1	Chromosome 1 open reading frame 144 (C1orf144), mRNA	SZRD1	FALSE	FALSE	10.6764	67.9986	29.6419	20.225	13.1478	0.0188865	0.999999	0.0715292	6.36903	2.77638	1.89436	1.23147	2.29401	FALSE	FALSE	FALSE
NM_031417.1	MAP/microtubule affinity-regulating kinase 4	MARK4	FALSE	FALSE	12.9491	82.4325	25.5651	24.5181	11.3395	0.0966707	0.999999	0.0188178	6.3659	1.97428	1.89343	0.8757	3.22441	FALSE	FALSE	FALSE
NM_001564.1	inhibitor of growth family, member 2 (ING2)	ING2	FALSE	FALSE	14.6626	93.3357	53.5046	27.7611	23.7322	0.285125	0.999999	0.453796	6.36558	3.64906	1.89333	1.61856	1.74444	FALSE	FALSE	FALSE
BC022054.1	chromosome 10 open reading frame 83 (C10orf83)	MORN4	FALSE	FALSE	5.30537	33.7705	11.6048	10.0444	5.14737	0.00940568	0.999999	0.00075001	6.36534	2.18738	1.89326	0.970219	2.91003	FALSE	FALSE	FALSE
NM_152435.1	amidohydrolase domain containing 1 (AMDHD1)	AMDHD1	FALSE	FALSE	14.7245	93.5173	43.3219	27.8151	19.2156	0.259017	0.999999	0.0315954	6.35114	2.94216	1.88904	1.30501	2.15866	FALSE	FALSE	FALSE
BC052991.1	sphingosine-1-phosphate lyase 1 (SGPL1)	SGPL1	FALSE	FALSE	8.04916	51.0822	22.4668	15.1935	9.96524	0.00768754	0.999999	0.00204476	6.34628	2.7912	1.88759	1.23805	2.27367	FALSE	FALSE	FALSE
NM_018285.1	IMP3, U3 small nucleolar ribonucleoprotein, homolog (yeast) (IMP3)	IMP3	FALSE	FALSE	7.61405	48.2414	16.3898	14.3486	7.26973	0.0191208	0.999999	0.0055965	6.33584	2.15257	1.88449	0.954779	2.94339	FALSE	FALSE	FALSE
NM_021175.1	hepcidin antimicrobial peptide (HAMP)	HAMP	FALSE	FALSE	10.6869	67.7029	26.4236	20.1371	11.7203	0.0306441	0.999999	0.0189193	6.33511	2.47252	1.88427	1.09669	2.56221	FALSE	FALSE	FALSE
BC007401.2	cell division cycle 25 homolog A (S. pombe) (CDC25A)	CDC25A	FALSE	FALSE	14.8267	93.8862	68.1885	27.9248	30.2453	0.00463397	0.326698	0.405623	6.33222	4.59903	1.88341	2.03991	1.37686	FALSE	FALSE	FALSE
NM_024492.2	lipoprotein, Lp(a)-like 2 (LPAL2), transcript variant 1	LPAL2	FALSE	FALSE	15.303	96.8421	53.7139	28.804	23.825	0.150385	0.999999	0.223812	6.32831	3.51003	1.88225	1.55688	1.80292	FALSE	FALSE	FALSE
NM_000151.1	glucose-6-phosphatase, catalytic subunit (G6PC)	G6PC	FALSE	FALSE	5.53434	35.0125	15.9383	10.4139	7.06951	0.148302	0.999999	0.0363284	6.32641	2.8799	1.88168	1.27739	2.19675	FALSE	FALSE	FALSE
NM_003516.2	histone cluster 2, H2aa3 (HIST2H2AA3)	HIST2H2AA3	FALSE	FALSE	7.03842	44.5198	19.4591	13.2416	8.63114	0.0148745	0.999999	0.00865712	6.32525	2.76469	1.88134	1.22629	2.28787	FALSE	FALSE	FALSE
NM_004286.2	GTP binding protein 1 (GTPBP1)	GTPBP1	FALSE	FALSE	12.9684	82.0094	44.8736	24.3923	19.9038	0.16472	0.999999	0.336732	6.32378	3.46022	1.8809	1.53479	1.82757	FALSE	FALSE	FALSE
BC030262.1	ADAMTS-like 1 (ADAMTSL1)	ADAMTSL1	FALSE	FALSE	7.62676	48.2213	17.8957	14.3426	7.93772	0.0202236	0.999999	0.00363656	6.32265	2.34644	1.88056	1.04077	2.69457	FALSE	FALSE	FALSE
BC056256.1	immunoglobulin kappa constant (IGKC)	IGKC	FALSE	FALSE	7.93607	50.1764	18.5411	14.9241	8.22398	0.00531591	0.999999	5.14003e-05	6.32259	2.33631	1.88054	1.03628	2.70622	FALSE	FALSE	FALSE
BC053576.1	UDP glucuronosyltransferase 1 family, polypeptide A10 (UGT1A10)	UGT1A10	FALSE	FALSE	5.03999	31.8531	12.2051	9.47416	5.41362	0.0784922	0.999999	0.00586422	6.32008	2.42165	1.8798	1.07413	2.60982	FALSE	FALSE	FALSE
NM_003893.2	LIM domain-binding protein 1	LDB1	FALSE	FALSE	14.3561	90.7297	63.4085	26.986	28.1251	0.0190217	0.673521	0.0963147	6.31995	4.41684	1.87976	1.9591	1.43088	FALSE	FALSE	FALSE
NM_004586.1	ribosomal protein S6 kinase, 90kDa, polypeptide 3 (RPS6KA3)	RPS6KA3	FALSE	FALSE	7.95446	50.2658	16.1133	14.9507	7.1471	0.0253664	0.999999	0.00549786	6.3192	2.02569	1.87954	0.898503	3.11953	FALSE	FALSE	FALSE
NM_001031.4	40S ribosomal protein S28	RPS28	FALSE	FALSE	14.6171	92.3501	35.189	27.4679	15.6082	0.0563403	0.999999	0.0196834	6.31797	2.40739	1.87917	1.06781	2.6244	FALSE	FALSE	FALSE
NM_001124.1	adrenomedullin (ADM)	ADM	FALSE	FALSE	6.23715	39.3858	11.401	11.7146	5.05696	0.161466	0.999999	0.00631259	6.31471	1.82792	1.8782	0.810781	3.45459	FALSE	FALSE	FALSE
NM_198243.1	ankyrin repeat and SOCS box-containing 7 (ASB7), transcript variant 2	ASB7	FALSE	FALSE	5.50701	34.7689	11.1157	10.3414	4.93039	0.0119779	0.999999	0.000220409	6.31357	2.01846	1.87786	0.895295	3.12792	FALSE	FALSE	FALSE
NM_016082.3	CDK5 regulatory subunit associated protein 1 (CDK5RAP1), transcript variant 2	CDK5RAP1	FALSE	FALSE	4.10509	25.9122	8.3329	7.70714	3.69609	0.00964325	0.999999	0.000220409	6.31222	2.02989	1.87746	0.900367	3.10963	FALSE	FALSE	FALSE
BC018140.1	ribosomal protein S21 (RPS21)	RPS21	FALSE	FALSE	7.02797	44.3511	14.3183	13.1915	6.35095	0.00517022	0.999999	0.000293046	6.31066	2.03734	1.877	0.903668	3.09751	FALSE	FALSE	FALSE
NM_016359.2	Nucleolar and spindle associated protein 1 (NUSAP1), transcript variant 1, mRNA	NUSAP1	FALSE	FALSE	10.1932	64.3048	25.518	19.1263	11.3186	0.0412267	0.999999	0.0301958	6.30859	2.50343	1.87638	1.11041	2.51998	FALSE	FALSE	FALSE
NM_005900.1	SMAD family member 1 (SMAD1), transcript variant 1	SMAD1	FALSE	FALSE	10.6406	67.1104	53.0183	19.9608	23.5165	0.24813	0.865038	0.538289	6.30701	4.98263	1.87591	2.21007	1.2658	FALSE	FALSE	FALSE
BC035621.1	Hypothetical protein DKFZp434J0113, mRNA (cDNA clone MGC:44907 IMAGE:5171752), complete cds	FAM186B	FALSE	FALSE	7.63566	48.1567	17.8383	14.3234	7.91226	0.0132639	0.999999	0.00156762	6.30682	2.33619	1.87586	1.03622	2.69962	FALSE	FALSE	FALSE
NM_004119.1	fms-related tyrosine kinase 3 (FLT3); see catalog number for detailed information on wild-type or point mutant status	FLT3	FALSE	FALSE	11.1209	70.1332	24.0693	20.8599	10.676	0.00878461	0.999999	0.00230645	6.30644	2.16433	1.87574	0.959998	2.9138	FALSE	FALSE	FALSE
NM_198722.1	Adhesion molecule with Ig-like domain 3 (AMIGO3), mRNA	AMIGO3	FALSE	FALSE	6.69294	42.1934	14.7896	12.5497	6.56	0.0921815	0.999999	0.00685104	6.30416	2.20974	1.87506	0.980136	2.8529	FALSE	FALSE	FALSE
BC022854.1	membrane-spanning 4-domains, subfamily A, member 6A (MS4A6A)	MS4A6A	FALSE	FALSE	5.74153	36.1731	12.0137	10.7591	5.3287	0.0556424	0.999999	0.00075001	6.30025	2.09241	1.8739	0.928098	3.011	FALSE	FALSE	FALSE
NM_000404.1	galactosidase, beta 1 (GLB1), transcript variant 1	GLB1	FALSE	FALSE	4.11296	25.9091	9.30407	7.70621	4.12686	0.0121271	0.999999	0.000220409	6.29938	2.26214	1.87364	1.00338	2.78471	FALSE	FALSE	FALSE
NM_001014977.1	Chromosome 20 open reading frame 179 (C20orf179), transcript variant 2, mRNA	BANF2	FALSE	FALSE	8.39028	52.8502	27.3964	15.7194	12.1518	0.0605366	0.999999	0.0871214	6.29898	3.26525	1.87352	1.44832	1.92909	FALSE	FALSE	FALSE
BC047450.1	KIAA0562 (KIAA0562)	CEP104	FALSE	FALSE	4.82912	30.4018	11.6597	9.04249	5.17171	0.070568	0.999999	0.010412	6.29551	2.41446	1.87249	1.07094	2.60742	FALSE	FALSE	FALSE
BC051790.1	syntaxin 17 (STX17)	STX17	FALSE	TRUE	15.5528	97.8502	64.8765	29.1038	28.7762	0.34375	0.999999	0.282327	6.2915	4.17139	1.8713	1.85023	1.50825	FALSE	FALSE	FALSE
NM_031311.2	carboxypeptidase, vitellogenic-like (CPVL), transcript variant 1	CPVL	FALSE	FALSE	7.47543	47.0157	18.0517	13.984	8.0069	0.0445572	0.999999	0.00278095	6.28936	2.41481	1.87066	1.0711	2.6045	FALSE	FALSE	FALSE
NM_001004480.1	Olfactory receptor, family 11, subfamily H, member 6 (OR11H6), mRNA	OR11H6	FALSE	FALSE	14.8362	93.2894	53.9455	27.7473	23.9277	0.208643	0.999999	0.279621	6.28794	3.63606	1.87024	1.61279	1.72933	FALSE	FALSE	FALSE
BC015667.2	kelch-like 29 (Drosophila) (KLHL29)	KLHL29	FALSE	FALSE	12.8771	80.9353	8.66321	24.0728	3.8426	0.19623	0.999999	0.00077041	6.28523	0.672763	1.86943	0.298406	9.34241	FALSE	FALSE	FALSE
BC003193.1	leucine rich repeat containing 1 (LRRC1)	LRRC1	FALSE	FALSE	19.5272	122.696	74.7056	36.4938	33.1359	0.219602	0.999999	0.127359	6.28334	3.82572	1.86887	1.69691	1.64239	FALSE	FALSE	FALSE
NM_020444.2	UPF0498 protein KIAA1191	KIAA1191	FALSE	FALSE	23.5908	148.182	76.3849	44.0743	33.8808	0.689232	0.999999	0.244176	6.28137	3.23791	1.86828	1.43619	1.93995	FALSE	FALSE	FALSE
NM_005157.2	v-abl Abelson murine leukemia viral oncogene homolog 1 (ABL1), transcript variant a; see catalog number for detailed information on wild-type or point mutant status	ABL1	FALSE	TRUE	20.2106	126.857	43.6211	37.7314	19.3483	0.0368983	0.999999	0.00272471	6.27675	2.15832	1.86691	0.957332	2.90816	FALSE	FALSE	FALSE
NM_003600.1	aurora kinase A (AURKA), transcript variant 2	AURKA	FALSE	FALSE	15.8256	99.2344	46.5514	29.5156	20.6481	0.163723	0.999999	0.0828501	6.2705	2.94153	1.86505	1.30472	2.13172	FALSE	FALSE	FALSE
BC010124.2	neuroblastoma breakpoint family, member 1 (NBPF1)	NBPF1	FALSE	FALSE	9.73112	60.9828	26.1348	18.1383	11.5922	0.712486	0.999999	0.332618	6.26678	2.68569	1.86394	1.19125	2.33339	FALSE	FALSE	FALSE
NM_130463.2	V-type proton ATPase subunit G 2	ATP6V1G2	FALSE	FALSE	7.73968	48.4727	28.7454	14.4174	12.7501	0.0422542	0.999999	0.0896707	6.26289	3.71403	1.86279	1.64737	1.68628	FALSE	FALSE	FALSE
BC010137.1	GTP-binding protein 8 (putative) (GTPBP8)	GTPBP8	FALSE	FALSE	7.83878	49.0844	18.1048	14.5993	8.03046	0.0445794	0.999999	0.0316825	6.26174	2.30965	1.86245	1.02445	2.71112	FALSE	FALSE	FALSE
BC038381.1	Breast carcinoma-amplified sequence 4	BCAS4	FALSE	FALSE	13.9057	87.0547	70.2739	25.8929	31.1703	0.0821969	0.818854	0.451292	6.26036	5.05361	1.86204	2.24155	1.23879	FALSE	FALSE	FALSE
NM_003367.2	Upstream stimulatory factor 2	USF2	FALSE	FALSE	16.3756	102.51	70.7973	30.4899	31.4024	0.0387599	0.857164	0.232148	6.25993	4.32333	1.86191	1.91763	1.44794	FALSE	FALSE	FALSE
BC051031.1	chromosome 11 open reading frame 74 (C11orf74)	C11orf74	FALSE	FALSE	18.7617	117.432	65.4154	34.928	29.0152	0.103058	0.713682	0.42605	6.25912	3.48665	1.86167	1.54652	1.79517	FALSE	FALSE	FALSE
NM_017812.1	coiled-coil-helix-coiled-coil-helix domain containing 3 (CHCHD3)	CHCHD3	FALSE	FALSE	5.01899	31.4033	12.5383	9.34038	5.56142	0.00551099	0.999999	0.00144759	6.25691	2.49818	1.86101	1.10808	2.50459	FALSE	FALSE	FALSE
NM_006406.1	peroxiredoxin 4 (PRDX4)	PRDX4	FALSE	FALSE	12.8569	80.4438	38.3656	23.9266	17.0172	0.00477148	0.999999	0.00801941	6.25687	2.98405	1.861	1.32359	2.09677	FALSE	FALSE	FALSE
BC039362.1	carboxypeptidase A5 (CPA5)	CPA5	FALSE	FALSE	5.94356	37.1846	12.26	11.0599	5.43797	0.00707627	0.999999	5.14003e-05	6.25629	2.06274	1.86083	0.914934	3.03301	FALSE	FALSE	FALSE
NM_005536.2	inositol(myo)-1(or 4)-monophosphatase 1 (IMPA1)	IMPA1	FALSE	FALSE	13.4237	83.9763	43.4521	24.9773	19.2733	0.0668812	0.999999	0.0994771	6.25581	3.23696	1.86068	1.43577	1.93262	FALSE	FALSE	FALSE
NM_173824.2	Chromosome 3 open reading frame 38 (C3orf38), mRNA	C3orf38	FALSE	FALSE	9.00083	56.3071	26.4442	16.7476	11.7294	0.107359	0.999999	0.0107107	6.25577	2.93797	1.86067	1.30315	2.12928	FALSE	FALSE	FALSE
BC003188.1	MACRO domain-containing protein 1	MACROD1	FALSE	FALSE	12.1279	75.8616	39.7814	22.5637	17.6452	0.102959	0.999999	0.26573	6.25511	3.28014	1.86047	1.45492	1.90696	FALSE	FALSE	FALSE
NM_005801.2	eukaryotic translation initiation factor 1 (EIF1)	EIF1	FALSE	FALSE	11.1773	69.9015	28.7675	20.791	12.7599	0.00683538	0.999999	0.00408696	6.2539	2.57375	1.86011	1.1416	2.42987	FALSE	FALSE	FALSE
NM_201567.1	cell division cycle 25 homolog A (S. pombe) (CDC25A), transcript variant 2	CDC25A	FALSE	FALSE	20.3816	127.383	75.8618	37.8878	33.6488	0.0615726	0.889007	0.239134	6.24988	3.72207	1.85892	1.65094	1.67914	FALSE	FALSE	FALSE
NM_004997.2	myosin binding protein H (MYBPH)	MYBPH	FALSE	FALSE	9.80861	61.3008	26.3941	18.2329	11.7072	0.135206	0.999999	0.105091	6.24969	2.69092	1.85886	1.19357	2.32251	FALSE	FALSE	FALSE
NM_152255.1	proteasome (prosome, macropain) subunit, alpha type, 7 (PSMA7), transcript variant 2	PSMA7	TRUE	FALSE	7.18116	44.8549	13.0265	13.3413	5.77795	0.0982313	0.999999	0.00270356	6.24619	1.81398	1.85782	0.804599	3.44336	FALSE	FALSE	FALSE
NM_031213.2	Abhydrolase domain-containing protein FAM108A1	ABHD17A	FALSE	FALSE	7.28438	45.4986	15.2019	13.5328	6.74286	0.0139259	0.999999	0.00231963	6.24605	2.08692	1.85778	0.92566	2.99296	FALSE	FALSE	FALSE
BC050444.1	golgi autoantigen, golgin subfamily a, 4 (GOLGA4)	GOLGA4	FALSE	FALSE	2.30368	14.3883	4.31649	4.27954	1.9146	0.0109184	0.999999	5.14003e-05	6.24577	1.87374	1.8577	0.831103	3.33332	FALSE	FALSE	FALSE
NM_152441.1	F-box and leucine-rich repeat protein 14 (FBXL14)	FBXL14	FALSE	FALSE	6.97121	43.5317	16.883	12.9478	7.48851	0.0135489	0.999999	0.00123578	6.24449	2.42181	1.85732	1.0742	2.57844	FALSE	FALSE	FALSE
BC022251.1	zinc finger, AN1-type domain 1 (ZFAND1)	ZFAND1	FALSE	FALSE	8.89393	55.5265	29.4833	16.5154	13.0774	0.779499	0.999999	0.534444	6.24319	3.31499	1.85693	1.47038	1.88332	FALSE	FALSE	FALSE
BC069023.1	apolipoprotein B mRNA editing enzyme, catalytic polypeptide-like 3H (APOBEC3H)	APOBEC3H	FALSE	FALSE	5.50564	34.3524	16.9245	10.2175	7.50691	0.0190595	0.999999	0.0121257	6.23949	3.07402	1.85583	1.36349	2.02975	FALSE	FALSE	FALSE
NM_178821.1	WD repeat domain 69 (WDR69)	DAW1	FALSE	FALSE	9.30417	58.0488	33.9878	17.2656	15.0754	0.033815	0.762832	0.178911	6.23901	3.65297	1.85569	1.62029	1.70793	FALSE	FALSE	FALSE
NM_002357.1	MAX dimerization protein 1 (MXD1)	MXD1	FALSE	FALSE	5.5622	34.7003	14.2123	10.321	6.30392	0.0627643	0.999999	0.00368291	6.23859	2.55516	1.85556	1.13335	2.44157	FALSE	FALSE	FALSE
NM_025128.3	MUS81 endonuclease homolog (S. cerevisiae) (MUS81)	MUS81	FALSE	FALSE	3.96317	24.7146	7.85179	7.35094	3.48269	0.00695935	0.999999	0.000252772	6.23607	1.98119	1.85481	0.878763	3.14765	FALSE	FALSE	FALSE
BC027484.1	tribbles homolog 3 (Drosophila) (TRIB3)	TRIB3	FALSE	FALSE	13.3112	83.0092	49.0421	24.6897	21.7528	0.215353	0.999999	0.0900556	6.23605	3.68428	1.85481	1.63418	1.69261	FALSE	FALSE	FALSE
NM_000575.1	Interleukin-1 alpha	IL1A	FALSE	FALSE	2.24958	14.0247	3.37143	4.17141	1.49541	0.187285	0.999999	0.00370753	6.23438	1.49869	1.85431	0.664751	4.15988	FALSE	FALSE	FALSE
NM_138960.3	Homeobox protein TGIF2LX	TGIF2LX	FALSE	FALSE	16.0602	100.06	66.6089	29.7612	29.5446	0.0119023	0.824618	0.0396254	6.23034	4.14746	1.85311	1.83962	1.5022	FALSE	FALSE	FALSE
NM_144608.1	hexamthylene bis-acetamide inducible 2 (HEXIM2)	HEXIM2	FALSE	FALSE	11.0651	68.9389	32.1892	20.5047	14.2776	0.0381116	0.999999	0.0245717	6.23031	2.90908	1.8531	1.29033	2.14168	FALSE	FALSE	FALSE
NM_032338.2	chromosome 12 open reading frame 31 (C12orf31)	LLPH	FALSE	FALSE	7.7914	48.5101	17.9136	14.4285	7.94566	0.0602923	0.999999	0.0181288	6.22611	2.29915	1.85185	1.0198	2.708	FALSE	FALSE	FALSE
BC015600.1	Sulfatase-modifying factor 2	SUMF2	FALSE	FALSE	5.58571	34.7662	10.9195	10.3406	4.84339	0.256269	0.999999	0.0260648	6.22414	1.9549	1.85126	0.867105	3.18386	FALSE	FALSE	FALSE
NM_024915.1	grainyhead-like 2 (Drosophila) (GRHL2)	GRHL2	FALSE	FALSE	13.5685	84.4175	32.3559	25.1085	14.3516	0.0134504	0.999999	0.000729028	6.22159	2.38463	1.8505	1.05771	2.60903	FALSE	FALSE	FALSE
NM_001086.1	Arylacetamide deacetylase	AADAC	FALSE	FALSE	4.96007	30.8575	8.06867	9.17804	3.57889	0.0285836	0.999999	5.14003e-05	6.22119	1.62673	1.85039	0.72154	3.82437	FALSE	FALSE	FALSE
NM_019069.3	WD repeat domain 5B (WDR5B)	WDR5B	FALSE	FALSE	5.74207	35.7223	15.4619	10.625	6.85819	0.00452949	0.999999	0.000826508	6.22115	2.69274	1.85037	1.19438	2.31034	FALSE	FALSE	FALSE
NM_021640.2	chromosome 12 open reading frame 10 (C12orf10)	C12orf10	FALSE	FALSE	7.43082	46.207	22.0458	13.7435	9.77848	0.411845	0.999999	0.0433275	6.2183	2.9668	1.84952	1.31594	2.09596	FALSE	FALSE	FALSE
NM_133490.2	potassium voltage-gated channel, subfamily G, member 4 (KCNG4), transcript variant 2	KCNG4	FALSE	FALSE	5.21067	32.3941	13.47	9.63507	5.97466	0.101074	0.999999	0.0218285	6.21688	2.58508	1.8491	1.14662	2.40491	FALSE	FALSE	FALSE
BC021121.1	WNK lysine deficient protein kinase 1 (WNK1)	WNK1	TRUE	TRUE	13.0803	81.288	37.9956	24.1777	16.8531	0.0446422	0.999999	0.033651	6.21453	2.90479	1.8484	1.28843	2.1394	FALSE	FALSE	FALSE
BC032302.1	UDP-glucose ceramide glucosyltransferase-like 2 (UGCGL2)	UGGT2	FALSE	FALSE	16.2102	100.736	31.6841	29.9622	14.0536	0.00707627	0.999999	0.00278095	6.21436	1.95457	1.84835	0.866959	3.17939	FALSE	FALSE	FALSE
NM_014364.1	glyceraldehyde-3-phosphate dehydrogenase, spermatogenic (GAPDHS)	GAPDHS	FALSE	FALSE	4.77862	29.6916	10.461	8.83126	4.64002	0.0154611	0.999999	0.0039128	6.21344	2.18913	1.84808	0.970996	2.83831	FALSE	FALSE	FALSE
NM_001005404.3	Protein yippee-like 2	YPEL2	FALSE	FALSE	17.1911	106.792	47.2895	31.7633	20.9754	0.0255549	0.999999	0.0380721	6.21203	2.75081	1.84766	1.22013	2.25825	FALSE	FALSE	FALSE
NM_015568.2	protein phosphatase 1, regulatory (inhibitor) subunit 16B (PPP1R16B)	PPP1R16B	FALSE	FALSE	9.00203	55.9195	20.6853	16.6323	9.17506	0.0383791	0.999999	0.0227509	6.21187	2.29785	1.84761	1.01922	2.70334	FALSE	FALSE	FALSE
NM_015894.2	stathmin-like 3 (STMN3)	STMN3	FALSE	FALSE	6.48343	40.2325	14.5598	11.9665	6.45807	0.0820451	0.999999	0.00475053	6.20543	2.2457	1.8457	0.996088	2.76325	FALSE	FALSE	FALSE
NP_001267.2	CHI3L1 Protein (His Tag)	CHI3L1	FALSE	FALSE	2.07251	12.8561	6.02365	3.82384	2.67181	0.290856	0.999999	0.114525	6.20318	2.90646	1.84503	1.28917	2.13428	FALSE	FALSE	FALSE
BC017770.1	RNA binding motif protein 8A (RBM8A)	RBM8A	FALSE	FALSE	14.4697	89.7204	50.6212	26.6858	22.4532	0.588975	0.999999	0.487569	6.20055	3.49842	1.84425	1.55174	1.77239	FALSE	FALSE	FALSE
BC006323.1	ATP-binding cassette, sub-family B (MDR/TAP), member 7 (ABCB7)	ABCB7	FALSE	FALSE	10.2149	63.3148	30.946	18.8319	13.7262	0.00263822	0.818854	0.0176637	6.19825	3.02948	1.84356	1.34374	2.04598	FALSE	FALSE	FALSE
BC048214.1	chromosome 8 open reading frame 13 (C8orf13)	FAM167A	FALSE	FALSE	8.23044	51.0078	14.357	15.1714	6.3681	0.0614528	0.999999	0.00169308	6.19746	1.74438	1.84333	0.773726	3.55281	FALSE	FALSE	FALSE
NM_015407.3	abhydrolase domain containing 14A (ABHD14A)	ABHD14A	FALSE	FALSE	7.68108	47.5579	19.1104	14.1453	8.47649	0.0486104	0.999999	0.00278095	6.19157	2.48799	1.84158	1.10356	2.48859	FALSE	FALSE	FALSE
BC009621.1	recombination activating gene 1 activating protein 1 (RAG1AP1)	SLC50A1	FALSE	FALSE	15.713	97.2669	65.1936	28.9303	28.9169	0.0493242	0.818854	0.242878	6.1902	4.14901	1.84117	1.84031	1.49197	FALSE	FALSE	FALSE
NM_147197.2	WAP four-disulfide core domain 11 (WFDC11)	WFDC11	FALSE	FALSE	5.42138	33.5516	12.2929	9.97934	5.45254	0.180439	0.999999	0.00798533	6.18876	2.26748	1.84074	1.00575	2.72936	FALSE	FALSE	FALSE
NM_005191.2	CD80 molecule (CD80)	CD80	FALSE	FALSE	6.63379	41.0324	17.1583	12.2044	7.61062	0.0217135	0.999999	0.00877302	6.18536	2.5865	1.83973	1.14725	2.39141	FALSE	FALSE	FALSE
BC022374.1	PHD finger protein 19	PHF19	FALSE	FALSE	7.9975	49.4666	16.0096	14.713	7.1011	0.0372713	0.999999	0.00441336	6.18526	2.00182	1.8397	0.887915	3.08982	FALSE	FALSE	FALSE
NM_004896.2	vacuolar protein sorting 26 homolog A (S. pombe) (VPS26A), transcript variant 1	VPS26A	FALSE	FALSE	6.74473	41.7155	19.2456	12.4075	8.53644	0.569472	0.999999	0.467356	6.18489	2.85342	1.83959	1.26565	2.16754	FALSE	FALSE	FALSE
NM_015920.3	40S ribosomal protein S27-like protein	RPS27L	FALSE	FALSE	11.6309	71.8978	31.285	21.3847	13.8766	0.0753369	0.999999	0.0818756	6.18159	2.68981	1.83861	1.19308	2.29815	FALSE	FALSE	FALSE
NM_001001938.1	Chromosome 9 open reading frame 47 (C9orf47), mRNA	C9orf47	FALSE	FALSE	7.3758	45.564	12.3154	13.5522	5.46254	0.0198529	0.999999	0	6.1775	1.6697	1.83739	0.740603	3.69976	FALSE	FALSE	FALSE
ENST00000309403	Database:core Gene:ENSG00000172769 Clone:AP002345 Contig:AP002345.3.1.147358 Chr:11 Basepair:59683299 Status:known	OR5B3	FALSE	FALSE	4.12785	25.494	9.09197	7.58275	4.03278	0.0227109	0.999999	0.000826508	6.17609	2.20259	1.83697	0.976967	2.80401	FALSE	FALSE	FALSE
NM_004829.1	natural cytotoxicity triggering receptor 1 (NCR1)	NCR1	FALSE	FALSE	5.39642	33.3278	8.21727	9.91279	3.6448	0.103757	0.999999	0.00887875	6.17592	1.52273	1.83692	0.675411	4.05583	FALSE	FALSE	FALSE
BC010175.1	ubiquitin-conjugating enzyme E2A (RAD6 homolog) (UBE2A)	UBE2A	FALSE	FALSE	10.9244	67.4214	64.9108	20.0533	28.7914	0.137502	0.911642	0.498865	6.17162	5.9418	1.83564	2.63551	1.03868	FALSE	FALSE	FALSE
NM_001008710.1	RNA-binding protein with multiple splicing	RBPMS	FALSE	FALSE	12.6305	77.9325	50.4385	23.1797	22.3722	0.0233614	0.941817	0.157004	6.17019	3.99339	1.83522	1.77128	1.5451	FALSE	FALSE	FALSE
BC018063.1	potassium channel tetramerisation domain containing 4 (KCTD4)	KCTD4	FALSE	FALSE	11.1458	68.7613	25.8471	20.4519	11.4646	0.0163558	0.999999	0.00897958	6.16923	2.31899	1.83493	1.0286	2.66031	FALSE	FALSE	FALSE
NM_001168.1	baculoviral IAP repeat-containing 5 (survivin) (BIRC5), transcript variant 1	BIRC5	FALSE	FALSE	11.6239	71.6844	40.0616	21.3213	17.7695	0.630827	0.999999	0.522	6.167	3.4465	1.83427	1.52871	1.78935	FALSE	FALSE	FALSE
NM_006257.2	protein kinase C, theta (PRKCQ)	PRKCQ	TRUE	FALSE	12.4771	76.902	41.508	22.8732	18.411	0.051422	0.999999	0.0419335	6.16346	3.32674	1.83321	1.47559	1.8527	FALSE	FALSE	FALSE
NM_001543.3	Bifunctional heparan sulfate N-deacetylase/N-sulfotransferase 1	NDST1	FALSE	FALSE	7.2912	44.9126	15.9427	13.3585	7.07146	0.0239485	0.999999	0.00079025	6.15984	2.18657	1.83214	0.969862	2.81712	FALSE	FALSE	FALSE
BC012547.1	eukaryotic translation initiation factor 4A, isoform 2 (EIF4A2)	EIF4A2	FALSE	FALSE	9.69563	59.6776	23.7318	17.7501	10.5263	0.0352954	0.999999	0.0039128	6.1551	2.44768	1.83073	1.08568	2.51466	FALSE	FALSE	FALSE
BC011707.1	nuclear receptor binding factor 2 (NRBF2)	NRBF2	FALSE	FALSE	27.0938	166.683	125.974	49.5771	55.8764	0.00500405	0.473218	0.27457	6.15209	4.64957	1.82983	2.06233	1.32315	FALSE	FALSE	FALSE
NM_003993.2	CDC-like kinase 2 (CLK2), transcript variant 1	CLK2	FALSE	FALSE	6.24747	38.4277	13.9971	11.4296	6.20847	0.0262019	0.999999	0.0119881	6.15092	2.24044	1.82948	0.993757	2.7454	FALSE	FALSE	FALSE
BC043193.2	chromosome 4 open reading frame 18 (C4orf18)	FAM198B	FALSE	FALSE	4.419	27.1563	8.14042	8.07718	3.61071	0.077269	0.999999	0.0024718	6.14535	1.84214	1.82783	0.817088	3.33599	FALSE	FALSE	FALSE
NM_001167.2	baculoviral IAP repeat-containing 4 (BIRC4)	XIAP	FALSE	FALSE	10.7095	65.7977	42.3722	19.5704	18.7943	0.0238914	0.595824	0.266857	6.14384	3.9565	1.82738	1.75492	1.55285	FALSE	FALSE	FALSE
NM_001284.2	AP-3 complex subunit sigma-1	AP3S1	FALSE	FALSE	8.90027	54.6641	25.696	16.2589	11.3975	0.0149967	0.999999	0.0106845	6.14185	2.8871	1.82679	1.28058	2.12734	FALSE	FALSE	FALSE
BC057837.1	TR4 orphan receptor associated protein TRA16 (TRA16)	NR2C2AP	FALSE	FALSE	8.31082	51.0415	16.3767	15.1814	7.26396	0.152285	0.999999	0.0257441	6.14157	1.97053	1.8267	0.874036	3.11671	FALSE	FALSE	FALSE
NM_001005735.1	CHK2 checkpoint homolog (S. pombe) (CHEK2), transcript variant 3	CHEK2	FALSE	FALSE	16.0165	98.3546	58.7773	29.2539	26.0709	0.00800611	0.801569	0.0357892	6.14083	3.66979	1.82648	1.62775	1.67334	FALSE	FALSE	FALSE
NM_004838.2	homer homolog 3 (Drosophila) (HOMER3)	HOMER3	FALSE	FALSE	9.28438	56.9626	26.9738	16.9425	11.9643	0.0139469	0.875459	0.0820493	6.13531	2.90529	1.82484	1.28865	2.11178	FALSE	FALSE	FALSE
BC033009.2	alcohol dehydrogenase IB (class I), beta polypeptide (ADH1B)	ADH1B	FALSE	FALSE	1.42627	8.75009	2.48299	2.60256	1.10134	0.0563403	0.999999	0.00877302	6.13493	1.7409	1.82473	0.772181	3.52401	FALSE	FALSE	FALSE
NM_145306.1	chromosome 10 open reading frame 35 (C10orf35)	C10orf35	FALSE	FALSE	19.8081	121.501	59.2486	36.1382	26.2799	0.276909	0.999999	0.0945328	6.13387	2.99112	1.82441	1.32672	2.05069	FALSE	FALSE	FALSE
BC059358.1	RAB3A interacting protein (rabin3) (RAB3IP)	RAB3IP	FALSE	FALSE	8.51604	52.236	22.8099	15.5367	10.1174	0.0478808	0.999999	0.00787964	6.13384	2.67846	1.8244	1.18804	2.29006	FALSE	FALSE	FALSE
NM_001000.2	Ribosomal protein L39 (RPL39), mRNA	RPL39	FALSE	FALSE	7.12821	43.7045	18.4406	12.9992	8.17941	0.0132465	0.973176	0.109682	6.13121	2.58699	1.82362	1.14747	2.37001	FALSE	FALSE	FALSE
NM_018047.1	Pre-mRNA-splicing factor RBM22	RBM22	FALSE	FALSE	23.924	146.637	83.3299	43.6147	36.9613	0.0366407	0.999999	0.0238149	6.12929	3.48311	1.82305	1.54495	1.75972	FALSE	FALSE	FALSE
NM_018983.2	nucleolar protein family A, member 1 (H/ACA small nucleolar RNPs) (NOLA1), transcript variant 1	GAR1	FALSE	FALSE	5.02767	30.7954	10.955	9.15955	4.85914	0.0279066	0.999999	0.00530907	6.12518	2.17894	1.82183	0.966479	2.81107	FALSE	FALSE	FALSE
BC039855.1	chromosome 6 open reading frame 117 (C6orf117)	MRAP2	FALSE	FALSE	6.35929	38.9487	12.3531	11.5846	5.47928	0.0641738	0.999999	0.00171555	6.12469	1.94253	1.82168	0.861618	3.15294	FALSE	FALSE	FALSE
NM_003805.2	CASP2 and RIPK1 domain containing adaptor with death domain (CRADD)	CRADD	FALSE	FALSE	8.43946	51.6798	25.5525	15.3713	11.3339	0.0727939	0.999999	0.0728663	6.12359	3.02774	1.82136	1.34297	2.02249	FALSE	FALSE	FALSE
NM_007022.1	cytochrome b-561 domain containing 2 (CYB561D2)	CYB561D2	FALSE	FALSE	6.29253	38.5292	14.9707	11.4598	6.6403	0.0977078	0.999999	0.0558743	6.123	2.37912	1.82118	1.05527	2.57364	FALSE	FALSE	FALSE
NM_006880.2	Mdm2, transformed 3T3 cell double minute 2, p53 binding protein (mouse) (MDM2), transcript variant MDM2c, mRNA	MDM2	FALSE	FALSE	18.6776	114.363	75.2964	34.0153	33.398	0.871858	0.999999	0.404075	6.12299	4.03137	1.82118	1.78813	1.51884	FALSE	FALSE	FALSE
BC058915.1	SEC14-like 2 (S. cerevisiae) (SEC14L2)	SEC14L2	FALSE	FALSE	6.07065	37.1685	14.6366	11.0551	6.49213	0.212986	0.999999	0.0279532	6.12266	2.41105	1.82108	1.06943	2.53942	FALSE	FALSE	FALSE
BC078671.1	Immunoglobulin heavy constant gamma 1 (G1m marker), mRNA (cDNA clone MGC:88811 IMAGE:6281248), complete cds	IGHG1	FALSE	FALSE	8.52469	52.1856	16.8094	15.5217	7.45588	0.0390786	0.999999	0.0129146	6.1217	1.97185	1.82079	0.874621	3.10455	FALSE	FALSE	FALSE
BC030155.1	tumor necrosis factor receptor superfamily, member 11b (osteoprotegerin) (TNFRSF11B)	TNFRSF11B	FALSE	FALSE	6.11171	37.4083	15.5856	11.1265	6.91304	0.0395102	0.999999	0.00631451	6.12077	2.55012	1.82052	1.13111	2.40019	FALSE	FALSE	FALSE
NM_002755.2	mitogen-activated protein kinase kinase 1 (MAP2K1); see catalog number for detailed information on wild-type or point mutant status	MAP2K1	FALSE	FALSE	14.4688	88.544	46.082	26.3359	20.4398	0.00439837	0.999999	0.00347645	6.11963	3.18491	1.82018	1.41268	1.92144	FALSE	FALSE	FALSE
BC070073.1	Protein ZNF365	ZNF365	FALSE	FALSE	6.65233	40.7014	12.0637	12.1059	5.35089	0.021373	0.999999	0.00267773	6.11837	1.81345	1.8198	0.804363	3.37388	FALSE	FALSE	FALSE
NM_020530.2	oncostatin M (OSM)	OSM	FALSE	FALSE	9.1811	56.1717	21.0482	16.7073	9.33599	0.00284443	0.999999	0.00475453	6.11818	2.29255	1.81975	1.01687	2.66872	FALSE	FALSE	FALSE
NM_001002269.1	Exosome complex exonuclease RRP40	EXOSC3	FALSE	FALSE	33.2909	203.658	87.9271	60.5744	39.0004	0.0447139	0.999999	0.0694732	6.11752	2.64118	1.81955	1.1715	2.31621	FALSE	FALSE	FALSE
NM_033012.2	Tumor necrosis factor (ligand) superfamily, member 11 (TNFSF11), transcript variant 2, mRNA	TNFSF11	FALSE	FALSE	8.60848	52.6594	25.6953	15.6626	11.3973	0.175139	0.999999	0.316708	6.11715	2.98489	1.81944	1.32396	2.04937	FALSE	FALSE	FALSE
NM_194270.1	MORN repeat containing 2 (MORN2)	MORN2	FALSE	FALSE	12.7484	77.9718	35.8005	23.1914	15.8794	0.304326	0.999999	0.0733633	6.11618	2.80823	1.81915	1.2456	2.17795	FALSE	FALSE	FALSE
NM_000997.2	ribosomal protein L37 (RPL37)	RPL37	FALSE	FALSE	6.09705	37.2805	11.0198	11.0884	4.88789	0.0541124	0.999999	0.00169308	6.11452	1.80741	1.81866	0.801682	3.38303	FALSE	FALSE	FALSE
NM_018154.2	Histone chaperone ASF1B	ASF1B	FALSE	FALSE	13.49	82.4486	36.8821	24.5229	16.3592	0.0513467	0.999999	0.0408136	6.11181	2.73402	1.81785	1.21268	2.23547	FALSE	FALSE	FALSE
BC026104.2	programmed cell death 4 (neoplastic transformation inhibitor) (PDCD4)	PDCD4	FALSE	FALSE	11.6566	71.2144	37.3374	21.1815	16.5611	0.273803	0.999999	0.280485	6.10935	3.20311	1.81712	1.42075	1.90732	FALSE	FALSE	FALSE
BC056398.1	adaptor-related protein complex 3, mu 2 subunit (AP3M2)	AP3M2	FALSE	FALSE	7.0877	43.2854	17.4576	12.8745	7.74339	0.0244703	0.999999	0.00837085	6.10711	2.46309	1.81645	1.09251	2.47945	FALSE	FALSE	FALSE
BC011719.1	transmembrane protein 43 (TMEM43)	TMEM43	FALSE	FALSE	5.55283	33.8968	10.4878	10.082	4.65189	0.0447543	0.999999	0.00150426	6.10443	1.88873	1.81566	0.837751	3.23203	FALSE	FALSE	FALSE
NM_178425.1	histone deacetylase 9 (HDAC9), transcript variant 5	HDAC9	FALSE	FALSE	19.5534	119.339	55.8545	35.4953	24.7745	0.00707627	0.925187	0.017101	6.10324	2.85652	1.8153	1.26702	2.1366	FALSE	FALSE	FALSE
BC093864.1	Disks large homolog 3	DLG3	FALSE	FALSE	14.7398	89.9532	40.484	26.755	17.9568	0.646518	0.999999	0.0970958	6.10274	2.74658	1.81515	1.21825	2.22194	FALSE	FALSE	FALSE
NM_205853.1	musculoskeletal, embryonic nuclear protein 1 (MUSTN1)	MUSTN1	FALSE	FALSE	28.7102	175.191	85.7006	52.1075	38.0128	0.0744023	0.999999	0.0169337	6.10204	2.98502	1.81495	1.32402	2.04422	FALSE	FALSE	FALSE
NM_174925.1	hypothetical protein LOC205251 (LOC205251)	SMIM37	FALSE	FALSE	9.08391	55.4125	23.8246	16.4815	10.5675	0.0182274	0.999999	0.022917	6.10007	2.62273	1.81436	1.16332	2.32585	FALSE	FALSE	FALSE
NM_024683.2	Chromosome 17 open reading frame 42 (C17orf42), mRNA	TEFM	FALSE	FALSE	6.90768	42.1067	15.09	12.5239	6.69322	0.0059923	0.999999	0.000220409	6.09563	2.18452	1.81304	0.968954	2.79037	FALSE	FALSE	FALSE
NM_024667.1	Hypothetical protein FLJ12750 (FLJ12750), mRNA	VPS37B	FALSE	FALSE	20.0334	122.082	52.7779	36.3112	23.4098	0.0646085	0.999999	0.0380721	6.09393	2.6345	1.81253	1.16854	2.31313	FALSE	FALSE	FALSE
NM_182723.1	CAMP responsive element modulator (CREM), transcript variant 10, mRNA	CREM	FALSE	FALSE	3.99988	24.3651	8.69557	7.24697	3.85695	0.0759245	0.999999	0.00486371	6.09146	2.17396	1.8118	0.964268	2.80201	FALSE	FALSE	FALSE
BC017799.1	nucleoporin 62kDa C-terminal like (NUP62CL)	NUP62CL	FALSE	FALSE	20.5179	124.983	66.3987	37.1742	29.4514	0.0605366	0.999999	0.0987832	6.09143	3.23613	1.81179	1.4354	1.88232	FALSE	FALSE	FALSE
BC015858.1	Zinc finger protein 37a (KOX 21), mRNA (cDNA clone MGC:27353 IMAGE:4671816), complete cds	ZNF37A	FALSE	FALSE	5.11267	31.0959	9.43066	9.24893	4.183	0.263188	0.999999	0.000481596	6.08212	1.84457	1.80902	0.818164	3.29732	FALSE	FALSE	FALSE
BC104469.1	Outer dense fiber protein 3-like protein 2	ODF3L2	FALSE	FALSE	14.394	87.54	51.0566	26.0373	22.6464	0.0820451	0.999999	0.148805	6.08172	3.54709	1.8089	1.57332	1.71457	FALSE	FALSE	FALSE
NM_000199.2	N-sulfoglucosamine sulfohydrolase (sulfamidase) (SGSH)	SGSH	FALSE	FALSE	4.74531	28.8584	8.84896	8.58342	3.92499	0.0823944	0.999999	0.00265109	6.08145	1.86478	1.80882	0.82713	3.26122	FALSE	FALSE	FALSE
NM_203488.1	Acylphosphatase-1	ACYP1	FALSE	FALSE	10.6631	64.8396	26.726	19.2854	11.8544	0.0132639	0.999999	0.00936975	6.08074	2.5064	1.80861	1.11172	2.42608	FALSE	FALSE	FALSE
NM_006399.2	basic leucine zipper transcription factor, ATF-like (BATF)	BATF	FALSE	FALSE	12.7864	77.7484	36.1587	23.1249	16.0383	0.0181889	0.999999	0.0660238	6.08058	2.82791	1.80856	1.25433	2.1502	FALSE	FALSE	FALSE
AB065755.1	olfactory receptor, family 10, subfamily G, member 8 (OR10G8), mRNA	OR10G8	FALSE	FALSE	5.21822	31.7106	10.7394	9.43177	4.76348	0.0785627	0.999999	0.0040346	6.0769	2.05805	1.80747	0.912856	2.95275	FALSE	FALSE	FALSE
NM_016525.3	ubiquitin associated protein 1 (UBAP1)	UBAP1	FALSE	FALSE	37.3991	227.247	167.408	67.5906	74.2543	0.045181	0.581095	0.454215	6.07626	4.47625	1.80728	1.98546	1.35744	FALSE	FALSE	FALSE
NM_052820.1	Coronin-2A	CORO2A	FALSE	FALSE	14.8082	89.9509	45.3591	26.7543	20.1192	0.141901	0.999999	0.103247	6.07441	3.06311	1.80673	1.35865	1.98309	FALSE	FALSE	FALSE
BC042110.1	coiled-coil domain containing 78 (CCDC78)	CCDC78	FALSE	FALSE	10.2653	62.3559	24.5833	18.5467	10.904	0.0289569	0.999999	0.0188178	6.07441	2.39478	1.80673	1.06221	2.53652	FALSE	FALSE	FALSE
NM_001105.2	Activin receptor type-1	ACVR1	FALSE	FALSE	9.4939	57.6637	31.3439	17.1511	13.9027	0.50108	0.999999	0.116074	6.07377	3.30148	1.80654	1.46438	1.83971	FALSE	FALSE	FALSE
NM_014210.2	Ecotropic viral integration site 2A (EVI2A), transcript variant 2, mRNA	EVI2A	FALSE	FALSE	7.58057	46.042	14.1862	13.6944	6.29233	0.0691572	0.999999	0.000826508	6.07369	1.87139	1.80651	0.830061	3.24556	FALSE	FALSE	FALSE
BC048988.1	chromosome 13 open reading frame 3 (C13orf3)	SKA3	FALSE	FALSE	34.2129	207.708	181.163	61.7793	80.3555	0.0369002	0.613967	0.368545	6.07105	5.29516	1.80573	2.34869	1.14653	FALSE	FALSE	FALSE
BC020256.1	Protein KIAA1199	CEMIP	FALSE	FALSE	20.042	121.658	48.0399	36.185	21.3083	0.0946809	0.999999	0.0103849	6.07015	2.39697	1.80546	1.06318	2.53243	FALSE	FALSE	FALSE
BC012760.2	Glycogen synthase kinase-3 beta	GSK3B	FALSE	FALSE	16.9554	102.771	60.7124	30.5675	26.9292	0.0835753	0.999999	0.0991592	6.06128	3.58072	1.80282	1.58824	1.69275	FALSE	FALSE	FALSE
BC028151.1	splicing factor, arginine/serine-rich 17A (SFRS17A)	AKAP17A	FALSE	FALSE	7.86928	47.6562	24.9851	14.1745	11.0822	0.0165175	0.999999	0.00801037	6.05598	3.17501	1.80125	1.40829	1.90739	FALSE	FALSE	FALSE
NM_012459.1	translocase of inner mitochondrial membrane 8 homolog B (yeast) (TIMM8B)	TIMM8B	FALSE	FALSE	6.78667	41.075	17.5518	12.217	7.78517	0.0120741	0.999999	0.00486371	6.05231	2.58622	1.80015	1.14713	2.34021	FALSE	FALSE	FALSE
BC021118.1	paroxysmal nonkinesigenic dyskinesia (PNKD)	PNKD	FALSE	FALSE	6.13432	37.0902	10.7902	11.0319	4.78605	0.0845598	0.999999	0.00127693	6.04635	1.759	1.79838	0.780209	3.43739	FALSE	FALSE	FALSE
NM_006875.1	Serine/threonine-protein kinase Pim-2	PIM2	FALSE	FALSE	10.365	62.6691	31.4852	18.6398	13.9654	0.194371	0.999999	0.0429666	6.04622	3.03765	1.79834	1.34736	1.99043	FALSE	FALSE	FALSE
NM_002631.2	phosphogluconate dehydrogenase (PGD)	PGD	FALSE	FALSE	19.2089	116.069	60.3985	34.5227	26.79	0.262116	0.999999	0.277929	6.04245	3.1443	1.79722	1.39466	1.92172	FALSE	FALSE	FALSE
BC015738.1	Zinc finger FYVE domain-containing protein 19	ZFYVE19	FALSE	FALSE	24.4065	147.465	137.627	43.8609	61.0451	0.0181611	0.574245	0.408826	6.04203	5.63895	1.7971	2.50118	1.07148	FALSE	FALSE	FALSE
NM_014553.1	transcription factor CP2-like 1 (TFCP2L1)	TFCP2L1	FALSE	FALSE	11.167	67.4646	32.0602	20.0662	14.2204	0.871858	0.999999	0.466535	6.04143	2.87098	1.79692	1.27343	2.10431	FALSE	FALSE	FALSE
NM_003618.2	Mitogen-activated protein kinase kinase kinase kinase 3	MAP4K3	FALSE	FALSE	29.1795	176.263	31.8427	52.4265	14.1239	0.397884	0.999999	5.14003e-05	6.04065	1.09127	1.79669	0.484036	5.53544	FALSE	FALSE	FALSE
NM_012280.1	FtsJ homolog 1 (E. coli) (FTSJ1), transcript variant 1	FTSJ1	FALSE	FALSE	21.6248	130.516	72.3166	38.8198	32.0763	0.335746	0.999999	0.198215	6.0355	3.34416	1.79516	1.48331	1.80479	FALSE	FALSE	FALSE
P15509	GM-CSFR Protein (His Tag)	CSF2RA	FALSE	FALSE	3.55685	21.4451	17.7161	6.37848	7.85804	0.871858	0.999999	0.404075	6.02924	4.98083	1.79329	2.20927	1.21049	FALSE	FALSE	FALSE
BC095401.1	AKT-interacting protein	AKTIP	FALSE	FALSE	9.39406	56.6333	25.5969	16.8446	11.3536	0.00952486	0.999999	0.00439872	6.02863	2.72479	1.79311	1.20859	2.21251	FALSE	FALSE	FALSE
NM_173194.2	Kv channel interacting protein 2 (KCNIP2), transcript variant 5	KCNIP2	FALSE	FALSE	12.6777	76.4278	54.9076	22.7321	24.3545	0.319689	0.999999	0.411406	6.02851	4.33103	1.79308	1.92105	1.39193	FALSE	FALSE	FALSE
NM_030641.2	apolipoprotein L, 6 (APOL6)	APOL6	FALSE	FALSE	4.19575	25.2869	8.1547	7.52116	3.61705	0.0277416	0.999999	0.000220409	6.0268	1.94356	1.79257	0.862074	3.1009	FALSE	FALSE	FALSE
BC060863.1	Zinc finger protein 549, mRNA (cDNA clone MGC:71804 IMAGE:30340439), complete cds	ZNF549	FALSE	FALSE	5.66328	34.1311	6.74517	10.1517	2.99185	0.0381919	0.999999	0	6.02673	1.19104	1.79255	0.528288	5.06007	FALSE	FALSE	FALSE
NM_020401.2	Nucleoporin 107kDa (NUP107), mRNA	NUP107	FALSE	FALSE	3.73679	22.5185	7.1824	6.69773	3.18578	0.0530065	0.999999	0.000578812	6.02616	1.92208	1.79238	0.852545	3.13523	FALSE	FALSE	FALSE
BC100863.2	Neuritin-like protein	NRN1L	FALSE	FALSE	5.17271	31.163	17.8498	9.26889	7.91735	0.498408	0.999999	0.38235	6.0245	3.45077	1.79188	1.5306	1.74584	FALSE	FALSE	FALSE
NM_032138.2	kelch repeat and BTB (POZ) domain containing 7 (KBTBD7)	KBTBD7	FALSE	FALSE	10.0411	60.4903	34.3953	17.9918	15.2562	0.761845	0.999999	0.40241	6.02425	3.42544	1.79181	1.51937	1.75868	FALSE	FALSE	FALSE
NM_003636.1	potassium voltage-gated channel, shaker-related subfamily, beta member 2 (KCNAB2), transcript variant 1	KCNAB2	FALSE	FALSE	9.2452	55.664	25.3873	16.5563	11.2606	0.0180054	0.999999	0.0089968	6.02085	2.746	1.7908	1.218	2.19259	FALSE	FALSE	FALSE
NM_016013.2	NADH dehydrogenase (ubiquinone) 1 alpha subcomplex, assembly factor 1 (NDUFAF1)	NDUFAF1	FALSE	FALSE	7.22935	43.52	14.1037	12.9443	6.25573	0.0312823	0.999999	0.00429536	6.0199	1.95089	1.79052	0.865325	3.08572	FALSE	FALSE	FALSE
BC091500.1	Outer dense fiber protein 2	ODF2	FALSE	FALSE	23.6987	142.656	67.2665	42.4307	29.8363	0.191844	0.999999	0.0823843	6.01959	2.8384	1.79042	1.25898	2.12076	FALSE	FALSE	FALSE
NM_015849.2	elastase 2B (ELA2B)	CELA2B	FALSE	FALSE	6.51011	39.179	15.5372	11.6531	6.89158	0.037596	0.999999	0.00294879	6.01819	2.38663	1.79001	1.0586	2.52163	FALSE	FALSE	FALSE
BC010427.1	polymerase (RNA) II (DNA directed) polypeptide D (POLR2D)	POLR2D	FALSE	FALSE	12.6741	76.1869	30.5133	22.6605	13.5343	0.600271	0.999999	0.060222	6.01124	2.40754	1.78794	1.06787	2.49684	FALSE	FALSE	FALSE
NM_032858.1	maelstrom homolog (Drosophila) (MAEL)	MAEL	FALSE	FALSE	6.10678	36.707	12.6338	10.9179	5.60379	0.0138684	0.999999	5.14003e-05	6.01086	2.06882	1.78783	0.917634	2.90545	FALSE	FALSE	FALSE
P01566	Interferon alpha 10 / IFNA10 Protein	IFNA10	FALSE	FALSE	3.0558	18.3675	17.0926	5.4631	7.58148	0.871858	0.999999	0.551232	6.01072	5.5935	1.78779	2.48102	1.07459	FALSE	FALSE	FALSE
BC014486.1	CAP-Gly domain-containing linker protein 3	CLIP3	FALSE	FALSE	6.52632	39.2269	15.1595	11.6674	6.72405	0.00965806	0.999999	0.00059609	6.01056	2.32282	1.78774	1.0303	2.58761	FALSE	FALSE	FALSE
BC039172.1	calmodulin-like 5 (CALML5)	CALML5	FALSE	FALSE	8.02923	48.2375	10.6286	14.3474	4.71438	0.020501	0.999999	0	6.00773	1.32374	1.7869	0.587151	4.53844	FALSE	FALSE	FALSE
BC036029.1	ADAM metallopeptidase domain 22 (ADAM22)	ADAM22	FALSE	FALSE	5.13718	30.8329	10.7178	9.17073	4.75394	0.014451	0.999999	5.14003e-05	6.00192	2.08633	1.78517	0.925398	2.87679	FALSE	FALSE	FALSE
NM_030636.1	Endonuclease/exonuclease/phosphatase family domain-containing protein 1	EEPD1	FALSE	FALSE	22.7498	136.534	90.071	40.6097	39.9513	0.200229	0.999999	0.209196	6.00155	3.95921	1.78506	1.75612	1.51585	FALSE	FALSE	FALSE
NM_153759.2	DNA (cytosine-5-)-methyltransferase 3 alpha (DNMT3A), transcript variant 2	DNMT3A	FALSE	FALSE	5.96408	35.7852	20.5986	10.6437	9.13656	0.0807975	0.999999	0.0458714	6.00012	3.45377	1.78463	1.53193	1.73727	FALSE	FALSE	FALSE
NM_001008917.1	Similar to RIKEN cDNA 2210021J22 (OTTHUMP00000028822).	CDPF1	FALSE	FALSE	9.46154	56.7662	20.6133	16.8841	9.14313	0.00460526	0.999999	5.14003e-05	5.99968	2.17865	1.7845	0.966346	2.75386	FALSE	FALSE	FALSE
NM_052875.2	Vacuolar protein sorting-associated protein 26B	VPS26B	FALSE	FALSE	16.786	100.68	49.8196	29.9456	22.0977	0.014849	0.999999	0.0329583	5.99788	2.96793	1.78397	1.31643	2.0209	FALSE	FALSE	FALSE
BC053610.1	protein kinase, AMP-activated, beta 2 non-catalytic subunit (PRKAB2)	PRKAB2	FALSE	FALSE	5.15502	30.9069	9.89475	9.19272	4.38885	0.0489357	0.999999	0.00059609	5.99549	1.91944	1.78325	0.851374	3.12356	FALSE	FALSE	FALSE
NM_176895.1	Lipid phosphate phosphohydrolase 1	PLPP1	FALSE	FALSE	8.44968	50.6588	17.6643	15.0676	7.83508	0.200345	0.999999	0.0236563	5.99535	2.09053	1.78321	0.927263	2.86786	FALSE	FALSE	FALSE
NM_138499.2	PWWP domain-containing protein 2B	PWWP2B	FALSE	FALSE	19.4791	116.726	94.6866	34.7181	41.9986	0.0704027	0.609363	0.58624	5.99236	4.86093	1.78232	2.15608	1.23276	FALSE	FALSE	FALSE
NM_024821.1	coiled-coil domain containing 134 (CCDC134)	CCDC134	FALSE	FALSE	5.06172	30.3305	8.01308	9.02129	3.55423	0.178321	0.999999	5.14003e-05	5.99214	1.58308	1.78226	0.702179	3.78513	FALSE	FALSE	FALSE
NM_001832.2	colipase, pancreatic (CLPS)	CLPS	FALSE	FALSE	5.75163	34.4526	13.3951	10.2473	5.94144	0.0395855	0.999999	0.00032916	5.99005	2.32892	1.78164	1.033	2.57203	FALSE	FALSE	FALSE
NM_014009.2	forkhead box P3 (FOXP3)	FOXP3	FALSE	FALSE	14.1601	84.7943	30.7438	25.2206	13.6365	0.0799282	0.999999	0.00442794	5.98826	2.17116	1.7811	0.963027	2.75809	FALSE	FALSE	FALSE
BC029382.1	Angiogenic factor with G patch and FHA domains 1	AGGF1	FALSE	FALSE	17.2006	102.986	51.4396	30.6314	22.8162	0.493627	0.999999	0.0295524	5.98737	2.99058	1.78084	1.32648	2.00207	FALSE	FALSE	FALSE
NM_198287.1	Inhibitor of growth protein 4	ING4	FALSE	FALSE	6.2752	37.5585	16.155	11.1711	7.1656	0.0528105	0.999999	0.0269925	5.98523	2.57442	1.7802	1.14189	2.32489	FALSE	FALSE	FALSE
NM_173610.1	transmembrane protein 84 (TMEM84)	EWSAT1	FALSE	FALSE	4.55633	27.2704	8.75833	8.1111	3.88479	0.114699	0.999999	0.00456598	5.98517	1.92223	1.78018	0.852614	3.11365	FALSE	FALSE	FALSE
NM_032467.1	Aspartate beta-hydroxylase (ASPH), transcript variant 4, mRNA	ASPH	FALSE	FALSE	5.09814	30.5053	9.88919	9.07327	4.38639	0.342246	0.999999	0.0301958	5.98361	1.93976	1.77972	0.86039	3.08471	FALSE	FALSE	FALSE
Invitrogen: PM_2135, VIMENTIN	VIMENTIN	VIM	TRUE	TRUE	10.4543	62.5482	10.8333	18.6039	4.80514	0.0276864	0.999999	0.000220409	5.98302	1.03625	1.77955	0.459634	5.77371	FALSE	FALSE	FALSE
NM_001841.1	cannabinoid receptor 2 (macrophage) (CNR2)	CNR2	FALSE	FALSE	9.34968	55.9334	18.0426	16.6364	8.00286	0.74112	0.999999	0.0292973	5.98239	1.92976	1.77936	0.855951	3.10008	FALSE	FALSE	FALSE
BC041563.1	oxysterol binding protein-like 1A (OSBPL1A)	OSBPL1A	FALSE	FALSE	11.99	71.6603	37.8401	21.3141	16.7841	0.529407	0.999999	0.398851	5.97668	3.15598	1.77766	1.39985	1.89376	FALSE	FALSE	FALSE
NM_175923.2	hypothetical protein MGC42630 (MGC42630)	FAM27E3	FALSE	FALSE	5.87864	35.1153	14.7662	10.4445	6.5496	0.115432	0.999999	0.0562361	5.97338	2.51184	1.77668	1.11414	2.37809	FALSE	FALSE	FALSE
NM_001011667.1	Coiled-coil-helix-coiled-coil-helix domain-containing protein 7	CHCHD7	FALSE	FALSE	4.54646	27.1464	9.43194	8.07423	4.18357	0.0186412	0.999999	5.14003e-05	5.9709	2.07457	1.77594	0.920184	2.87814	FALSE	FALSE	FALSE
NM_018031.2	WD repeat domain 6 (WDR6)	WDR6	FALSE	FALSE	5.99955	35.8125	14.7753	10.6518	6.55363	0.0174502	0.999999	0.0090744	5.9692	2.46273	1.77544	1.09235	2.42381	FALSE	FALSE	FALSE
NM_012121.4	CDC42 effector protein (Rho GTPase binding) 4 (CDC42EP4)	CDC42EP4	FALSE	FALSE	20.0903	119.895	61.2215	35.6608	27.155	0.0745011	0.999999	0.119649	5.96782	3.04732	1.77503	1.35165	1.95839	FALSE	FALSE	FALSE
BC034229.1	Zinc finger B-box domain containing protein 1	ZBBX	FALSE	FALSE	18.4948	110.304	38.775	32.8079	17.1988	0.0887319	0.999999	0.00901067	5.96404	2.09654	1.7739	0.929927	2.84471	FALSE	FALSE	FALSE
BC063666.1	cAMP responsive element binding protein 3-like 2 (CREB3L2)	CREB3L2	FALSE	FALSE	22.0863	131.681	69.021	39.1663	30.6145	0.104206	0.818854	0.406718	5.96212	3.12506	1.77333	1.38613	1.90784	FALSE	FALSE	FALSE
BC030260.1	Trypsin-2	PRSS2	FALSE	FALSE	7.69756	45.873	20.0665	13.6441	8.90058	0.101473	0.999999	0.00768305	5.95942	2.60687	1.77253	1.15629	2.28605	FALSE	FALSE	FALSE
NM_174923.1	coiled-coil domain containing 107 (CCDC107)	CCDC107	FALSE	FALSE	8.73512	52.0059	34.234	15.4682	15.1846	0.276983	0.95597	0.477277	5.95365	3.91912	1.77081	1.73834	1.51913	FALSE	FALSE	FALSE
NM_139242.1	mitochondrial methionyl-tRNA formyltransferase (MTFMT)	MTFMT	FALSE	FALSE	6.58973	39.1986	12.443	11.659	5.51913	0.128193	0.999999	0.0230055	5.94844	1.88824	1.76926	0.837534	3.15026	FALSE	FALSE	FALSE
BC038300.1	Scavenger receptor protein family member, mRNA (cDNA clone MGC:33976 IMAGE:5265018), complete cds	SCART1	FALSE	FALSE	6.12863	36.4547	13.8586	10.8428	6.14704	0.489276	0.999999	0.0684966	5.94826	2.26129	1.76921	1.003	2.63047	FALSE	FALSE	FALSE
NM_016504.1	Mitochondrial ribosomal protein L27 (MRPL27), mRNA	MRPL27	FALSE	FALSE	5.75977	34.2108	11.7677	10.1754	5.2196	0.0420733	0.999999	0.00290716	5.93961	2.04308	1.76664	0.906217	2.90718	FALSE	FALSE	FALSE
BC007581.1	aldehyde dehydrogenase 4 family, member A1 (ALDH4A1)	ALDH4A1	FALSE	FALSE	24.7329	146.885	7.34084	43.6884	3.25606	0.385165	0.999999	0	5.93886	0.296805	1.76641	0.131649	20.0093	FALSE	FALSE	FALSE
BC058899.1	DSN1, MIND kinetochore complex component, homolog (S. cerevisiae) (DSN1)	DSN1	FALSE	FALSE	12.5049	74.2036	45.8502	22.0706	20.337	0.0129305	0.754538	0.0335194	5.93396	3.66658	1.76496	1.62633	1.61839	FALSE	FALSE	FALSE
NM_015214.1	Phospholipase DDHD2	DDHD2	FALSE	FALSE	9.63133	57.1466	22.6892	16.9973	10.0639	0.0168993	0.999999	0.0522258	5.93341	2.35577	1.76479	1.04491	2.51867	FALSE	FALSE	FALSE
NM_170775.1	Small conductance calcium-activated potassium channel protein 2	KCNN2	FALSE	FALSE	5.7912	34.3492	16.1083	10.2166	7.14489	0.0518753	0.999999	0.0129616	5.93129	2.78151	1.76416	1.23375	2.1324	FALSE	FALSE	FALSE
NM_024812.1	Brain and acute leukemia cytoplasmic protein	BAALC	FALSE	TRUE	20.9869	124.459	111.395	37.0183	49.4095	0.12183	0.697781	0.49516	5.93032	5.3078	1.76387	2.3543	1.11728	FALSE	FALSE	FALSE
NM_001568.1	eukaryotic translation initiation factor 3, subunit E (EIF3E)	EIF3E	FALSE	FALSE	4.70099	27.8747	10.8695	8.29086	4.8212	0.0778905	0.999999	0.0138463	5.92955	2.31217	1.76364	1.02557	2.56449	FALSE	FALSE	FALSE
BC017781.1	endomucin (EMCN)	EMCN	FALSE	FALSE	25.9553	153.87	67.4805	45.766	29.9312	0.0472497	0.999999	0.00271424	5.92828	2.59988	1.76326	1.15319	2.28021	FALSE	FALSE	FALSE
NM_006675.3	tetraspanin 9 (TSPAN9)	TSPAN9	FALSE	FALSE	9.85996	58.4487	34.1079	17.3846	15.1287	0.0460962	0.999999	0.0245717	5.92789	3.45924	1.76315	1.53436	1.71364	FALSE	FALSE	FALSE
NM_052901.2	Calcium-binding mitochondrial carrier protein SCaMC-2	SLC25A25	FALSE	FALSE	6.1328	36.3512	16.588	10.812	7.35769	0.20212	0.999999	0.0380721	5.92735	2.70481	1.76299	1.19973	2.19141	FALSE	FALSE	FALSE
BC023569.1	UPF3 regulator of nonsense transcripts homolog A (yeast) (UPF3A)	UPF3A	FALSE	FALSE	12.0998	71.6858	32.1688	21.3217	14.2686	0.119923	0.999999	0.0799664	5.92454	2.65862	1.76215	1.17924	2.22843	FALSE	FALSE	FALSE
BC017262.1	chromosome 1 open reading frame 2 (C1orf2)	FAM189B	FALSE	FALSE	10.9514	64.8579	29.7416	19.2908	13.192	0.252688	0.999999	0.0340049	5.92234	2.71578	1.7615	1.20459	2.18071	FALSE	FALSE	FALSE
NM_033317.1	dermokine (DMKN), transcript variant 2	DMKN	FALSE	FALSE	15.6567	92.7188	64.1771	27.5776	28.466	0.255422	0.999999	0.259422	5.92198	4.09901	1.76139	1.81813	1.44473	FALSE	FALSE	FALSE
NM_004706.3	Rho guanine nucleotide exchange factor (GEF) 1 (ARHGEF1), transcript variant 2	ARHGEF1	FALSE	FALSE	9.16176	54.254	29.2923	16.1369	12.9927	0.0524089	0.999999	0.0333204	5.92179	3.19723	1.76133	1.41814	1.85216	FALSE	FALSE	FALSE
BC033154.1	Centromere protein L	CENPL	FALSE	FALSE	7.46778	44.2198	20.4235	13.1524	9.05892	0.0915211	0.999999	0.0039128	5.92141	2.73488	1.76122	1.21307	2.16514	FALSE	FALSE	FALSE
BC013186.1	RCSD domain containing 1 (RCSD1)	RCSD1	FALSE	FALSE	10.0731	59.6442	35.3099	17.7401	15.6619	0.010559	0.999999	0.0346624	5.92115	3.50538	1.76115	1.55482	1.68916	FALSE	FALSE	FALSE
BC001149.1	UTP14, U3 small nucleolar ribonucleoprotein, homolog A (yeast) (UTP14A)	UTP14A	FALSE	FALSE	6.41183	37.9529	12.5825	11.2884	5.581	0.0966707	0.999999	0.00605122	5.9192	1.96238	1.76056	0.870423	3.01633	FALSE	FALSE	FALSE
NM_018279.2	transmembrane protein 19 (TMEM19)	TMEM19	FALSE	FALSE	4.31569	25.5353	4.68341	7.59502	2.07734	0.0779379	0.999999	0.00218411	5.91684	1.0852	1.75986	0.481346	5.45229	FALSE	FALSE	FALSE
BC027607.1	zinc finger CCCH-type containing 14 (ZC3H14)	ZC3H14	TRUE	TRUE	3.58668	21.2199	7.73127	6.31148	3.42923	0.17746	0.999999	0.00151224	5.91629	2.15555	1.7597	0.956101	2.74468	FALSE	FALSE	FALSE
NM_001029896.1	WD repeat domain 45 (WDR45), transcript variant 2	WDR45	FALSE	FALSE	12.9985	76.8933	46.5757	22.8706	20.6588	0.0546855	0.999999	0.0140039	5.91555	3.58316	1.75948	1.58932	1.65093	FALSE	FALSE	FALSE
NM_194310.1	hypothetical protein LOC284837 (LOC284837)	AATBC	FALSE	FALSE	14.6167	86.4136	47.4625	25.7022	21.0522	0.132428	0.999999	0.128516	5.91199	3.24715	1.75842	1.44029	1.82067	FALSE	FALSE	FALSE
NM_001425.1	epithelial membrane protein 3 (EMP3)	EMP3	FALSE	FALSE	5.29179	31.2737	13.0921	9.30181	5.80705	0.00891678	0.999999	0.000252772	5.90985	2.47404	1.75778	1.09737	2.38874	FALSE	FALSE	FALSE
BC001487.2	TAR DNA-binding protein 43	TARDBP	FALSE	FALSE	10.2142	60.3605	24.4979	17.9532	10.8661	0.0412453	0.999999	0.0777501	5.90947	2.39841	1.75767	1.06382	2.46391	FALSE	FALSE	FALSE
NM_021822.1	apolipoprotein B mRNA editing enzyme, catalytic polypeptide-like 3G (APOBEC3G)	APOBEC3G	FALSE	FALSE	8.32067	49.1669	24.0211	14.6238	10.6547	0.246949	0.999999	0.157549	5.90901	2.88692	1.75753	1.2805	2.04682	FALSE	FALSE	FALSE
BC003160.1	acid phosphatase 2, lysosomal (ACP2)	ACP2	FALSE	FALSE	4.75673	28.0613	10.1349	8.34635	4.49539	0.070568	0.999999	0.00360688	5.89928	2.13065	1.75464	0.945059	2.76876	FALSE	FALSE	FALSE
NP_003801.1	TNFSF10 / APO2L / TRAIL / CD253 Protein (Native)	TNFSF10	FALSE	FALSE	1.08205	6.37897	2.53109	1.89731	1.12267	0.0618346	0.999999	0.00336162	5.89528	2.33917	1.75345	1.03755	2.52025	FALSE	FALSE	FALSE
BC054021.1	pterin-4 alpha-carbinolamine dehydratase/dimerization cofactor of hepatocyte nuclear factor 1 alpha (TCF1) 2 (PCBD2)	PCBD2	FALSE	FALSE	6.01066	35.4115	10.7061	10.5325	4.74875	0.0151841	0.999999	5.14003e-05	5.89145	1.78119	1.75231	0.790054	3.30759	FALSE	FALSE	FALSE
NM_001024646.1	CDC-like kinase 1 (CLK1), transcript variant 2	CLK1	FALSE	FALSE	3.15002	18.5502	5.57237	5.51744	2.47164	0.0219661	0.999999	0.000546161	5.88891	1.76899	1.75155	0.784643	3.32896	FALSE	FALSE	FALSE
BC000026.1	1-acylglycerol-3-phosphate O-acyltransferase 2 (lysophosphatidic acid acyltransferase, beta) (AGPAT2)	AGPAT2	FALSE	FALSE	5.17699	30.4794	9.05973	9.06558	4.01848	0.0945295	0.999999	0.00363656	5.88748	1.75	1.75113	0.776219	3.36428	FALSE	FALSE	FALSE
NM_020145.1	Endophilin-B2	SH3GLB2	FALSE	FALSE	15.5191	91.3314	81.4037	27.165	36.1069	0.370243	0.999999	0.459132	5.88512	5.2454	1.75043	2.32662	1.12196	FALSE	FALSE	FALSE
BC035281.1	fibromodulin (FMOD)	FMOD	FALSE	FALSE	6.29806	37.0405	11.5596	11.017	5.12729	0.337274	0.999999	0.0188941	5.88125	1.83542	1.74928	0.814107	3.20431	FALSE	FALSE	FALSE
NM_001862.2	cytochrome c oxidase subunit Vb (COX5B)	COX5B	FALSE	FALSE	8.34273	49.0507	19.1458	14.5893	8.4922	0.269757	0.999999	0.0933838	5.87946	2.29491	1.74874	1.01792	2.56196	FALSE	FALSE	FALSE
BC002794.1	tumor necrosis factor receptor superfamily, member 14 (herpesvirus entry mediator) (TNFRSF14)	TNFRSF14	FALSE	FALSE	4.28876	25.21	9.34017	7.49827	4.14287	0.0433838	0.999999	0.00177799	5.87814	2.17782	1.74835	0.965982	2.69909	FALSE	FALSE	FALSE
NM_005118.2	tumor necrosis factor (ligand) superfamily, member 15 (TNFSF15)	TNFSF15	FALSE	FALSE	11.5034	67.6085	28.4129	20.109	12.6027	0.103125	0.999999	0.170068	5.87727	2.46996	1.74809	1.09556	2.3795	FALSE	FALSE	FALSE
NM_205838.1	Leukocyte specific transcript 1 (LST1), transcript variant 3, mRNA	LST1	FALSE	FALSE	9.48713	55.7574	33.4161	16.5841	14.8218	0.205237	0.999999	0.132809	5.87717	3.52225	1.74806	1.56231	1.66858	FALSE	FALSE	FALSE
NM_003630.1	peroxisomal biogenesis factor 3 (PEX3)	PEX3	FALSE	FALSE	3.65909	21.4998	6.08945	6.39475	2.701	0.271929	0.999999	0.0101152	5.87572	1.66419	1.74763	0.73816	3.53067	FALSE	FALSE	FALSE
BC006012.1	Selenoprotein T	SELENOT	FALSE	FALSE	4.88248	28.6876	9.83518	8.53263	4.36243	0.228676	0.999999	0.0127533	5.87562	2.01438	1.7476	0.893487	2.91683	FALSE	FALSE	FALSE
NM_002596.2	PCTAIRE protein kinase 3 (PCTK3), transcript variant 3, mRNA	CDK18	FALSE	FALSE	10.5723	62.0958	29.3369	18.4693	13.0125	0.0428646	0.999999	0.110074	5.87344	2.77488	1.74695	1.23081	2.11665	FALSE	FALSE	FALSE
BC008788.2	chromosome 1 open reading frame 159 (C1orf159)	C1orf159	FALSE	FALSE	6.27355	36.8285	8.29133	10.954	3.67765	0.0923681	0.999999	5.14003e-05	5.87045	1.32163	1.74606	0.586215	4.44181	FALSE	FALSE	FALSE
BC057840.1	proteasome (prosome, macropain) subunit, beta type, 5 (PSMB5)	PSMB5	FALSE	FALSE	10.1037	59.2927	23.7706	17.6356	10.5435	0.0924124	0.999999	0.116435	5.86842	2.35266	1.74546	1.04353	2.49437	FALSE	FALSE	FALSE
NM_025187.2	chromosome 16 open reading frame 70 (C16orf70)	C16orf70	FALSE	FALSE	18.2504	107.101	53.5954	31.8553	23.7724	0.0592936	0.999999	0.158226	5.86841	2.93666	1.74546	1.30257	1.99833	FALSE	FALSE	FALSE
NM_001026.3	Ribosomal protein S24 (RPS24), transcript variant 2, mRNA	RPS24	FALSE	FALSE	5.22026	30.6052	9.77841	9.10299	4.33725	0.19169	0.999999	0.00489885	5.86277	1.87317	1.74378	0.83085	3.12987	FALSE	FALSE	FALSE
BC053872.1	copine V (CPNE5)	CPNE5	FALSE	FALSE	11.173	65.4797	40.7851	19.4758	18.0904	0.486012	0.999999	0.157692	5.86053	3.65032	1.74311	1.61911	1.60548	FALSE	FALSE	FALSE
NM_004069.3	AP-2 complex subunit sigma-1	AP2S1	FALSE	FALSE	8.07269	47.2917	19.7779	14.0661	8.77257	0.193299	0.999999	0.0262396	5.85823	2.44998	1.74243	1.0867	2.39114	FALSE	FALSE	FALSE
BC017423.1	mesoderm induction early response 1 homolog (Xenopus laevis) (MIER1)	MIER1	FALSE	FALSE	7.55927	44.2588	20.4306	13.164	9.06206	0.589376	0.999999	0.269087	5.85491	2.70272	1.74144	1.1988	2.1663	FALSE	FALSE	FALSE
BC096276.1	Solute carrier family 13 (sodium-dependent dicarboxylate transporter), member 2, mRNA (cDNA clone MGC:116942 IMAGE:40006564), complete cds	SLC13A2	FALSE	FALSE	5.48224	32.0978	10.3813	9.54694	4.60466	0.258251	0.999999	0.0247132	5.85488	1.89362	1.74143	0.839924	3.09189	FALSE	FALSE	FALSE
NM_025165.1	elongation factor RNA polymerase II-like 3 (ELL3)	ELL3	FALSE	FALSE	6.00685	35.1631	11.9583	10.4586	5.30413	0.0181611	0.999999	0.000826508	5.85383	1.99077	1.74112	0.883014	2.94048	FALSE	FALSE	FALSE
NM_004508.1	isopentenyl-diphosphate delta isomerase 1 (IDI1)	IDI1	FALSE	FALSE	7.7658	45.4481	18.3276	13.5178	8.12927	0.0219148	0.999999	0.00631451	5.85234	2.36004	1.74068	1.0468	2.47977	FALSE	FALSE	FALSE
NM_138625.2	BCL2-like 11 (apoptosis facilitator) (BCL2L11), transcript variant 5, mRNA	BCL2L11	FALSE	FALSE	13.0953	76.5862	59.8678	22.7792	26.5546	0.533586	0.999999	0.376107	5.84838	4.5717	1.7395	2.0278	1.27926	FALSE	FALSE	FALSE
NM_144705.1	tektin 4 (TEKT4)	TEKT4	FALSE	FALSE	18.1039	105.834	46.1388	31.4785	20.465	0.252147	0.999999	0.0522245	5.84593	2.54856	1.73877	1.13042	2.29382	FALSE	FALSE	FALSE
NM_009588.1	lymphotoxin beta (TNF superfamily, member 3) (LTB), transcript variant 2	LTB	FALSE	FALSE	9.85341	57.5782	32.8828	17.1256	14.5853	0.115325	0.999999	0.121469	5.84348	3.3372	1.73804	1.48023	1.75101	FALSE	FALSE	FALSE
NM_172028.1	ankyrin repeat and BTB (POZ) domain containing 1 (ABTB1), transcript variant 3	ABTB1	FALSE	FALSE	10.2444	59.8386	33.1855	17.798	14.7196	0.148907	0.999999	0.145821	5.84108	3.23937	1.73733	1.43683	1.80315	FALSE	FALSE	FALSE
NM_181622.1	Keratin-associated protein 13-3	KRTAP13-3	FALSE	FALSE	7.57124	44.2154	15.8382	13.1511	7.02509	0.0199107	0.999999	0.00270356	5.83992	2.09189	1.73698	0.927865	2.79169	FALSE	FALSE	FALSE
BC022003.1	myotubularin related protein 9 (MTMR9)	MTMR9	FALSE	FALSE	9.31309	54.3839	25.8351	16.1755	11.4593	0.26568	0.999999	0.204319	5.83951	2.77406	1.73686	1.23045	2.10504	FALSE	FALSE	FALSE
BC095467.1	Ras-related protein Rap-1b	RAP1B	FALSE	FALSE	18.161	106.032	60.1345	31.5375	26.6729	0.0381919	0.778633	0.16648	5.83846	3.31119	1.73655	1.46869	1.76325	FALSE	FALSE	FALSE
NM_003093.1	small nuclear ribonucleoprotein polypeptide C (SNRPC)	SNRPC	FALSE	FALSE	98.1384	572.895	439.765	170.398	195.059	0.871858	0.999999	0.4109	5.83762	4.48107	1.7363	1.98759	1.30273	FALSE	FALSE	FALSE
BC009710.1	golgi SNAP receptor complex member 2 (GOSR2)	GOSR2	FALSE	FALSE	12.515	73.045	8.1681	21.726	3.62299	0.100743	0.999999	5.14003e-05	5.83659	0.652664	1.73599	0.289491	8.94271	FALSE	FALSE	FALSE
BC017475.1	Tetratricopeptide repeat protein 15	TRAPPC12	FALSE	FALSE	6.41871	37.4199	12.8445	11.1299	5.69723	0.143879	0.999999	0.00206613	5.82982	2.0011	1.73398	0.887597	2.9133	FALSE	FALSE	FALSE
BC041366.2	ubiquitin specific peptidase 2 (USP2)	USP2	FALSE	FALSE	19.6058	114.289	58.9626	33.9932	26.1531	0.0596164	0.999999	0.0207557	5.82935	3.00741	1.73384	1.33395	1.93833	FALSE	FALSE	FALSE
NM_022091.2	DJ467N11.1 protein (DJ467N11.1), mRNA	ASCC3	FALSE	FALSE	6.46138	37.6496	14.597	11.1982	6.47454	0.014691	0.999999	0.00246166	5.82687	2.25911	1.7331	1.00204	2.57928	FALSE	FALSE	FALSE
NM_021038.3	muscleblind-like (Drosophila) (MBNL1), transcript variant 1	MBNL1	FALSE	FALSE	21.9713	127.982	54.3362	38.0662	24.101	0.00470746	0.999999	0.00032916	5.82497	2.47305	1.73254	1.09693	2.35538	FALSE	FALSE	FALSE
NM_003363.2	ubiquitin specific peptidase 4 (proto-oncogene) (USP4), transcript variant 1	USP4	FALSE	FALSE	12.7482	74.2546	68.2342	22.0857	30.2655	0.080078	0.654944	0.516737	5.8247	5.35244	1.73246	2.3741	1.08823	FALSE	FALSE	FALSE
NM_002495.1	NADH dehydrogenase [ubiquinone] iron-sulfur protein 4, mitochondrial	NDUFS4	FALSE	FALSE	4.30288	25.0487	8.88092	7.45031	3.93917	0.373762	0.999999	0.0188178	5.82139	2.06395	1.73147	0.915472	2.82051	FALSE	FALSE	FALSE
BC032416.1	serine/arginine repetitive matrix 2 (SRRM2)	SRRM2	TRUE	TRUE	10.7964	62.8322	34.2214	18.6884	15.179	0.0928111	0.999999	0.160352	5.81976	3.16971	1.73099	1.40594	1.83605	FALSE	FALSE	FALSE
NM_014805.2	EPM2A (laforin) interacting protein 1 (EPM2AIP1)	EPM2AIP1	FALSE	FALSE	15.3555	89.36	53.2237	26.5786	23.6076	0.690185	0.999999	0.231474	5.8194	3.46609	1.73088	1.5374	1.67895	FALSE	FALSE	FALSE
NM_003821.2	receptor-interacting serine-threonine kinase 2 (RIPK2)	RIPK2	FALSE	FALSE	9.04382	52.6108	20.6213	15.6482	9.14668	0.0930838	0.999999	0.0157843	5.81732	2.28016	1.73026	1.01137	2.55128	FALSE	FALSE	FALSE
BC009540.1	G protein-coupled receptor 87, mRNA (cDNA clone MGC:10065 IMAGE:3894333), complete cds	GPR87	FALSE	FALSE	2.60687	15.1645	8.06924	4.51041	3.57914	0.338034	0.999999	0.272322	5.81711	3.09537	1.7302	1.37296	1.87929	FALSE	FALSE	FALSE
BC020597.1	general transcription factor IIB (GTF2B)	GTF2B	FALSE	FALSE	5.40116	31.4082	9.2575	9.34183	4.1062	0.322327	0.999999	0.00417419	5.81509	1.71398	1.7296	0.760244	3.39273	FALSE	FALSE	FALSE
BC033025.1	phosphatidic acid phosphatase type 2 domain containing 1B (PPAPDC1B)	PLPP5	FALSE	FALSE	4.90296	28.508	10.2079	8.47921	4.52777	0.110527	0.999999	0.00732021	5.81445	2.082	1.72941	0.923478	2.79273	FALSE	FALSE	FALSE
NM_017867.1	chromosome 4 open reading frame 27 (C4orf27)	HPF1	FALSE	FALSE	21.8026	126.765	7.09449	37.7041	3.14679	0.603257	0.999999	0	5.81424	0.325397	1.72934	0.144331	17.8681	FALSE	FALSE	FALSE
NM_178849.1	Hepatocyte nuclear factor 4, alpha (HNF4A), transcript variant 1, mRNA	HNF4A	FALSE	FALSE	18.9135	109.954	45.8689	32.704	20.3453	0.0378257	0.999999	0.0227906	5.81354	2.4252	1.72914	1.07571	2.39714	FALSE	FALSE	FALSE
BC021930.1	KIAA1530 protein (KIAA1530)	UVSSA	FALSE	FALSE	17.3862	101.061	55.024	30.0589	24.4061	0.283826	0.999999	0.182094	5.81273	3.16481	1.7289	1.40376	1.83668	FALSE	FALSE	FALSE
BC025776.1	Urotensin-2	UTS2	FALSE	FALSE	9.64213	56.0468	44.1651	16.6701	19.5896	0.0299376	0.824618	0.204209	5.8127	4.58043	1.72889	2.03167	1.26903	FALSE	FALSE	FALSE
BC024590.1	dynamin 1-like (DNM1L)	DNM1L	FALSE	FALSE	6.00214	34.8757	12.8229	10.3732	5.68766	0.0518753	0.999999	0.00796016	5.81055	2.1364	1.72825	0.947606	2.71979	FALSE	FALSE	FALSE
BC011952.1	family with sequence similarity 18, member B2 (FAM18B2)	TVP23C	FALSE	FALSE	4.99869	29.034	11.3888	8.63567	5.05155	0.27649	0.999999	0.0260648	5.80833	2.27836	1.72759	1.01057	2.54935	FALSE	FALSE	FALSE
NM_019854.2	Protein arginine N-methyltransferase 8	PRMT8	FALSE	FALSE	7.67466	44.5761	16.4449	13.2584	7.29421	0.0511093	0.999999	0.00142729	5.80821	2.14276	1.72755	0.950428	2.71063	FALSE	FALSE	FALSE
BC038998.1	fragile X mental retardation 1 (FMR1)	FMR1	FALSE	FALSE	13.3402	77.471	50.3159	23.0424	22.3178	0.360797	0.999999	0.312274	5.80735	3.77176	1.7273	1.67298	1.53969	FALSE	FALSE	FALSE
ENST00000376764	RNA binding motif (RNP1, RRM) protein 3 (RBM3), transcript variant 2, mRNA	RBM3	FALSE	FALSE	8.81587	51.1908	24.1501	15.2258	10.7119	0.36077	0.999999	0.0435487	5.80667	2.73939	1.72709	1.21507	2.11969	FALSE	FALSE	FALSE
NM_006837.2	COP9 constitutive photomorphogenic homolog subunit 5 (Arabidopsis) (COPS5)	COPS5	FALSE	FALSE	10.7449	62.3872	27.9037	18.556	12.3768	0.138281	0.999999	0.0755956	5.80621	2.59692	1.72696	1.15187	2.23581	FALSE	FALSE	FALSE
BC004876.1	Protein MCM10 homolog	MCM10	FALSE	FALSE	22.3149	129.52	61.2053	38.5234	27.1478	0.0360871	0.999999	0.0896173	5.80418	2.7428	1.72635	1.21658	2.11615	FALSE	FALSE	FALSE
NM_020341.3	p21 protein (Cdc42/Rac)-activated kinase 7	PAK5	FALSE	FALSE	7.36056	42.7204	22.0081	12.7064	9.76176	0.0279066	0.999999	0.0256493	5.80396	2.99	1.72629	1.32622	1.94113	FALSE	FALSE	FALSE
BC029795.1	brain-derived neurotrophic factor (BDNF)	BDNF	FALSE	FALSE	5.15662	29.9173	10.137	8.89839	4.49632	0.00596286	0.999999	0	5.80173	1.96583	1.72562	0.871951	2.95129	FALSE	FALSE	FALSE
NM_020664.3	2,4-dienoyl CoA reductase 2, peroxisomal (DECR2)	DECR2	FALSE	FALSE	15.0517	87.2879	43.0182	25.9623	19.0809	0.0814816	0.999999	0.106334	5.7992	2.85803	1.72487	1.26769	2.02909	FALSE	FALSE	FALSE
NM_002082.1	G protein-coupled receptor kinase 6	GRK6	FALSE	FALSE	7.57663	43.9305	19.0798	13.0664	8.4629	0.0531176	0.999999	0.00877675	5.79816	2.51824	1.72456	1.11697	2.30247	FALSE	FALSE	FALSE
NM_001752.2	catalase (CAT)	CAT	TRUE	FALSE	20.795	120.55	66.4894	35.8555	29.4916	0.0243646	0.999999	0.0453726	5.79707	3.19738	1.72424	1.41821	1.81307	FALSE	FALSE	FALSE
NM_001006932.1	ribosomal protein S6 kinase, 90kDa, polypeptide 2 (RPS6KA2), transcript variant 2	RPS6KA2	FALSE	FALSE	16.76	97.0689	37.2218	28.8715	16.5099	0.0182289	0.999999	0.00329872	5.7917	2.22087	1.72264	0.985075	2.60785	FALSE	FALSE	FALSE
NM_144595.1	SLAIN motif family, member 1 (SLAIN1), transcript variant 2	SLAIN1	FALSE	TRUE	16.5215	95.6723	46.427	28.4561	20.5929	0.138163	0.999999	0.0338495	5.79078	2.8101	1.72237	1.24643	2.0607	FALSE	FALSE	FALSE
NM_004755.1	Ribosomal protein S6 kinase alpha-5	RPS6KA5	FALSE	FALSE	6.31661	36.5772	15.6072	10.8793	6.92264	0.118888	0.999999	0.0738226	5.79064	2.47082	1.72233	1.09594	2.34361	FALSE	FALSE	FALSE
BC051909.1	Coagulation factor II (thrombin) receptor, mRNA (cDNA clone MGC:60377 IMAGE:6172703), complete cds	F2R	FALSE	FALSE	4.6218	26.7527	9.09839	7.95714	4.03562	0.0824369	0.999999	0.00208077	5.78839	1.96858	1.72166	0.873172	2.94038	FALSE	FALSE	FALSE
BC060819.1	zinc finger E-box binding homeobox 2 (ZEB2)	ZEB2	FALSE	FALSE	10.3689	60.01	32.235	17.8489	14.298	0.010559	0.999999	0.0143681	5.78752	3.10883	1.7214	1.37893	1.86164	FALSE	FALSE	FALSE
NM_001014831.1	p21(CDKN1A)-activated kinase 4 (PAK4), transcript variant 2	PAK4	FALSE	FALSE	8.35607	48.3303	14.2789	14.375	6.33345	0.0419574	0.999999	0.00230645	5.78386	1.7088	1.72031	0.757946	3.38474	FALSE	FALSE	FALSE
BC012472.1	ubiquitin D (UBD)	UBD	FALSE	FALSE	6.28654	36.3498	15.3738	10.8116	6.81912	0.0255958	0.999999	0.0503528	5.78217	2.44552	1.71981	1.08472	2.36439	FALSE	FALSE	FALSE
NM_001007024.1	golgi SNAP receptor complex member 1 (GOSR1), transcript variant 3	GOSR1	FALSE	FALSE	5.23548	30.2592	5.88922	9.00007	2.61219	0.107692	0.999999	5.14003e-05	5.77964	1.12487	1.71905	0.498939	5.13806	FALSE	FALSE	FALSE
NM_032263.2	IQ domain-containing protein G	IQCG	FALSE	FALSE	4.58045	26.4466	10.7159	7.86607	4.75308	0.20212	0.999999	0.00839448	5.7738	2.33949	1.71732	1.03769	2.46797	FALSE	FALSE	FALSE
NM_018200.2	high-mobility group 20A (HMG20A)	HMG20A	FALSE	FALSE	7.18957	41.511	13.7161	12.3467	6.08385	0.450786	0.999999	0.0342827	5.77378	1.90778	1.71731	0.846205	3.02643	FALSE	FALSE	FALSE
BC048095.1	HRAS-like suppressor (HRASLS)	HRASLS	FALSE	FALSE	6.87374	39.6852	16.5259	11.8037	7.33014	0.112812	0.999999	0.0241389	5.77345	2.40421	1.71721	1.0664	2.40139	FALSE	FALSE	FALSE
NM_000514	G-DNF	GDNF	FALSE	FALSE	4.37528	25.2545	11.537	7.51152	5.11729	0.228676	0.999999	0.110368	5.77209	2.63687	1.71681	1.16959	2.189	FALSE	FALSE	FALSE
NM_019110.3	Zinc finger protein with KRAB and SCAN domains 4	ZKSCAN4	FALSE	FALSE	17.6735	102.009	55.8014	30.3409	24.7509	0.476625	0.999999	0.269978	5.7719	3.15735	1.71675	1.40046	1.82808	FALSE	FALSE	FALSE
BC060319.1	chromosome 19 open reading frame 33 (C19orf33)	C19orf33	FALSE	FALSE	15.995	92.3136	27.3033	27.4571	12.1105	0.0191208	0.999999	0.00456598	5.77141	1.70699	1.71661	0.757142	3.38104	FALSE	FALSE	FALSE
NM_005400.1	protein kinase C, epsilon (PRKCE)	PRKCE	TRUE	FALSE	5.45423	31.476	12.3599	9.36201	5.48229	0.0959875	0.999999	0.00270704	5.77095	2.26612	1.71647	1.00514	2.54662	FALSE	FALSE	FALSE
BC005895.1	COX11 homolog, cytochrome c oxidase assembly protein (yeast) (COX11)	COX11	FALSE	FALSE	3.56898	20.5851	6.55201	6.12269	2.90617	0.135383	0.999999	0.00059609	5.76779	1.83582	1.71553	0.814285	3.14181	FALSE	FALSE	FALSE
NP_001019799.1	NRP1 / Neuropilin-1 Protein	NRP1	FALSE	FALSE	3.21189	18.5182	12.8224	5.50792	5.68741	0.871858	0.999999	0.453652	5.76551	3.99216	1.71485	1.77074	1.44421	FALSE	FALSE	FALSE
BC000884.1	signal peptidase complex subunit 1 homolog (S. cerevisiae) (SPCS1)	SPCS1	FALSE	FALSE	5.83369	33.6321	11.8462	10.0033	5.25442	0.0589912	0.999999	0.00150426	5.76515	2.03065	1.71474	0.900703	2.83906	FALSE	FALSE	FALSE
BC072396.1	T cell receptor gamma variable 9, mRNA (cDNA clone MGC:90486 IMAGE:5755352), complete cds	TRGV9	FALSE	FALSE	7.62156	43.9152	17.057	13.0618	7.5657	0.0212242	0.999999	0.00505801	5.76197	2.23799	1.7138	0.992671	2.57461	FALSE	FALSE	FALSE
NM_019083.1	coiled-coil domain containing 76, mRNA (cDNA clone MGC:87928 IMAGE:5104751), complete cds	TRMT13	FALSE	FALSE	4.8537	27.957	15.6163	8.31534	6.92667	0.369242	0.999999	0.164973	5.75994	3.2174	1.71319	1.42709	1.79025	FALSE	FALSE	FALSE
BC102021.1	Beta-crystallin B3	CRYBB3	FALSE	FALSE	14.2926	82.2865	19.1415	24.4747	8.49028	0.31128	0.999999	0.164538	5.75727	1.33926	1.7124	0.594033	4.29885	FALSE	FALSE	FALSE
BC028138.1	ubiquitin associated and SH3 domain containing, A (UBASH3A)	UBASH3A	FALSE	FALSE	6.57392	37.8339	15.101	11.253	6.69812	0.033417	0.999999	0.000145229	5.75514	2.29711	1.71177	1.01889	2.50538	FALSE	FALSE	FALSE
BC022257.1	lectin, galactoside-binding, soluble, 14 (LGALS14)	LGALS14	FALSE	FALSE	16.5149	95.0167	63.2027	28.2611	28.0338	0.514545	0.999999	0.255638	5.75338	3.82701	1.71124	1.69748	1.50336	FALSE	FALSE	FALSE
NM_198257.1	E2F transcription factor 6 (E2F6), transcript variant e, mRNA	E2F6	FALSE	FALSE	10.8234	62.2616	28.8165	18.5186	12.7817	0.065393	0.999999	0.0755956	5.75252	2.66244	1.71099	1.18093	2.16062	FALSE	FALSE	FALSE
BC024187.2	DEAH (Asp-Glu-Ala-His) box polypeptide 40 (DHX40)	DHX40	FALSE	FALSE	17.2838	99.418	43.5501	29.5702	19.3168	0.037676	0.999999	0.0260662	5.75209	2.5197	1.71086	1.11762	2.28284	FALSE	FALSE	FALSE
BC029487.1	Transmembrane protein 120A	TMEM120A	FALSE	FALSE	5.50093	31.634	9.86234	9.40898	4.37448	0.020501	0.999999	0.00292357	5.75066	1.79285	1.71043	0.795224	3.20756	FALSE	FALSE	FALSE
BC001743.1	cDNA clone IMAGE:3537461, **** WARNING: chimeric clone ****	COA1	FALSE	FALSE	14.4554	83.1179	46.5286	24.722	20.6379	0.289236	0.999999	0.0755956	5.74997	3.21877	1.71023	1.4277	1.78638	FALSE	FALSE	FALSE
BC013902.1	FAD-dependent oxidoreductase domain containing 1 (FOXRED1)	FOXRED1	FALSE	FALSE	4.614	26.5287	8.03688	7.89049	3.56479	0.0639877	0.999999	5.14003e-05	5.7496	1.74184	1.71012	0.772601	3.30087	FALSE	FALSE	FALSE
BC073841.1	Kinesin light chain 3	KLC3	FALSE	FALSE	19.0794	109.698	93.4872	32.6279	41.4666	0.0391358	0.743428	0.296319	5.74955	4.89989	1.7101	2.17337	1.1734	FALSE	FALSE	FALSE
BC021995.1	Signal recognition particle 9 kDa protein	SRP9	FALSE	FALSE	5.1124	29.3853	11.214	8.74016	4.974	0.0199107	0.999999	0.00125746	5.74786	2.19349	1.7096	0.97293	2.62042	FALSE	FALSE	FALSE
BC012536.1	hydroxysteroid (17-beta) dehydrogenase 12 (HSD17B12)	HSD17B12	FALSE	FALSE	5.35302	30.7682	8.0028	9.15147	3.54967	0.402518	0.999999	0.00123775	5.74782	1.495	1.70959	0.663115	3.84468	FALSE	FALSE	FALSE
NM_006907.2	Pyrroline-5-carboxylate reductase 1, mitochondrial	PYCR1	FALSE	FALSE	11.5524	66.3899	53.3546	19.7465	23.6656	0.703879	0.999999	0.517337	5.74686	4.6185	1.70931	2.04855	1.24431	FALSE	FALSE	FALSE
NM_030803.5	ATG16 autophagy related 16-like 1 (S. cerevisiae) (ATG16L1), transcript variant 1	ATG16L1	FALSE	FALSE	18.2086	104.64	53.0956	31.1234	23.5508	0.287167	0.999999	0.141539	5.74674	2.91596	1.70927	1.29339	1.97079	FALSE	FALSE	FALSE
BC025729.1	CD99 molecule-like 2 (CD99L2)	CD99L2	TRUE	FALSE	10.0063	57.4961	22.0731	17.1012	9.7906	0.0615168	0.999999	0.0134769	5.746	2.20593	1.70905	0.978447	2.6048	FALSE	FALSE	FALSE
NM_007368.2	RAS p21 protein activator 3 (RASA3)	RASA3	FALSE	FALSE	15.5725	89.4764	53.1603	26.6132	23.5794	0.117815	0.990817	0.168838	5.74579	3.41372	1.70898	1.51417	1.68314	FALSE	FALSE	FALSE
NM_033046.1	rhotekin (RTKN), transcript variant 2	RTKN	FALSE	FALSE	15.7195	90.3087	62.7443	26.8608	27.8305	0.382628	0.875459	0.561925	5.74502	3.9915	1.70876	1.77044	1.43931	FALSE	FALSE	FALSE
NM_078470.1	COX15 homolog, cytochrome c oxidase assembly protein (yeast) (COX15), nuclear gene encoding mitochondrial protein, transcript variant 1	COX15	FALSE	FALSE	5.91288	33.9674	13.6226	10.103	6.04237	0.301385	0.999999	0.20881	5.74464	2.30389	1.70864	1.0219	2.49345	FALSE	FALSE	FALSE
BC009350.1	Eukaryotic translation initiation factor 2-alpha kinase 4	EIF2AK4	FALSE	FALSE	7.94257	45.6208	20.0152	13.5691	8.87782	0.0279305	0.999999	0.00867978	5.74383	2.51999	1.7084	1.11775	2.27931	FALSE	FALSE	FALSE
NM_014065.2	Protein asteroid homolog 1	ASTE1	FALSE	FALSE	9.43065	54.1588	27.0069	16.1086	11.979	0.494533	0.999999	0.0947012	5.74284	2.86373	1.70811	1.27022	2.00537	FALSE	FALSE	FALSE
NM_015484.1	SYF2 homolog, RNA splicing factor (S. cerevisiae) (SYF2), transcript variant 1	SYF2	FALSE	FALSE	11.4383	65.6791	31.9461	19.5351	14.1698	0.336079	0.999999	0.137347	5.74201	2.7929	1.70786	1.2388	2.05593	FALSE	FALSE	FALSE
BC040693.1	CD53 molecule (CD53)	CD53	FALSE	FALSE	5.94098	34.0977	12.3313	10.1418	5.46961	0.257225	0.999999	0.00483717	5.7394	2.07564	1.70709	0.920659	2.76512	FALSE	FALSE	FALSE
BC062701.1	aquaporin 7, mRNA (cDNA clone MGC:71981 IMAGE:30324263), complete cds	AQP7	FALSE	FALSE	8.70683	49.9674	16.4394	14.8619	7.29175	0.0287759	0.999999	5.14003e-05	5.73887	1.8881	1.70693	0.837474	3.03949	FALSE	FALSE	FALSE
NM_014475.2	Trans-1,2-dihydrobenzene-1,2-diol dehydrogenase	DHDH	FALSE	FALSE	8.99931	51.636	11.8931	15.3582	5.27524	0.0458826	0.999999	0	5.73777	1.32156	1.7066	0.586183	4.34167	FALSE	FALSE	FALSE
NM_005607.1	Focal adhesion kinase 1	PTK2	FALSE	FALSE	21.9327	125.812	45.2619	37.4207	20.0761	0.00512662	0.999999	0.00156762	5.73627	2.06367	1.70615	0.915348	2.77965	FALSE	FALSE	FALSE
BC056143.1	KIAA1008, mRNA (cDNA clone MGC:64876 IMAGE:5505671), complete cds	DIS3	FALSE	FALSE	2.69181	15.4409	4.80864	4.59264	2.13289	0.188029	0.999999	0.00230645	5.73625	1.78639	1.70615	0.792361	3.21108	FALSE	FALSE	FALSE
BC036872.1	Notum pectinacetylesterase homolog (Drosophila), mRNA (cDNA clone MGC:46492 IMAGE:5225889), complete cds	NOTUM	FALSE	FALSE	4.47106	25.6402	8.26874	7.62624	3.66763	0.0371704	0.999999	0.00311139	5.7347	1.84939	1.70569	0.820304	3.10086	FALSE	FALSE	FALSE
NM_207009.2	Family with sequence similarity 45, member A (FAM45A), mRNA	FAM45A	FALSE	FALSE	11.5361	66.1458	51.1047	19.6739	22.6677	0.811114	0.999999	0.466547	5.73383	4.42999	1.70543	1.96494	1.29432	FALSE	FALSE	FALSE
BC068536.1	KH domain-containing, RNA-binding, signal transduction-associated protein 3	KHDRBS3	FALSE	FALSE	10.7462	61.6097	18.0629	18.3248	8.01186	0.00500405	0.999999	0.00142729	5.73319	1.68087	1.70524	0.745555	3.41085	FALSE	FALSE	FALSE
NM_005776.2	cornichon homolog (Drosophila) (CNIH)	CNIH1	FALSE	FALSE	5.23987	30.0369	10.0731	8.93397	4.46797	0.0839996	0.999999	0.000668819	5.73239	1.9224	1.705	0.852687	2.98189	FALSE	FALSE	FALSE
BC038422.1	zinc finger protein 533 (ZNF533)	ZNF385B	FALSE	FALSE	6.21033	35.5978	13.3519	10.5879	5.92228	0.0678211	0.999999	0.00983441	5.73203	2.14995	1.70489	0.953618	2.66612	FALSE	FALSE	FALSE
NM_005019.3	phosphodiesterase 1A, calmodulin-dependent (PDE1A), transcript variant 1	PDE1A	FALSE	FALSE	7.4932	42.9065	15.2073	12.7618	6.74527	0.0820015	0.999999	0.0297207	5.72606	2.02948	1.70312	0.900185	2.82144	FALSE	FALSE	FALSE
BC018766.1	5,10-methylenetetrahydrofolate reductase (NADPH) (MTHFR)	MTHFR	FALSE	FALSE	13.3876	76.6431	38.2478	22.7962	16.965	0.290585	0.999999	0.154177	5.72493	2.85696	1.70278	1.26722	2.00385	FALSE	FALSE	FALSE
BC037399.1	KIAA0415 (KIAA0415)	AP5Z1	FALSE	FALSE	5.01723	28.7188	7.04765	8.54192	3.12601	0.0691116	0.999999	5.14003e-05	5.72403	1.40469	1.70251	0.623055	4.07495	FALSE	FALSE	FALSE
NM_033019.1	PCTAIRE protein kinase 1 (PCTK1), transcript variant 3	CDK16	FALSE	FALSE	8.39909	48.0415	21.7858	14.2891	9.66319	0.0541851	0.999999	0.0425007	5.71985	2.59383	1.70127	1.1505	2.20517	FALSE	FALSE	FALSE
NM_001011554.1	Solute carrier family 13 (sodium-dependent dicarboxylate transporter), member 3 (SLC13A3), transcript variant 2, mRNA	SLC13A3	FALSE	FALSE	5.70552	32.6242	12.6122	9.7035	5.5942	0.0526633	0.999999	0.0039128	5.71801	2.21053	1.70072	0.98049	2.58671	FALSE	FALSE	FALSE
BC070055.1	Guanylate-binding protein 4	GBP4	FALSE	FALSE	3.85014	22.0084	7.86242	6.54601	3.4874	0.283519	0.999999	0.00869467	5.71625	2.04211	1.7002	0.905786	2.79919	FALSE	FALSE	FALSE
NM_024117.3	mitogen-activated protein kinase associated protein 1 (MAPKAP1), transcript variant 2, mRNA.	MAPKAP1	FALSE	FALSE	6.22953	35.6091	14.6091	10.5913	6.47993	0.0528331	0.999999	0.00848795	5.71617	2.34514	1.70018	1.0402	2.43745	FALSE	FALSE	FALSE
BC009006.1	transmembrane protein 30A (TMEM30A)	TMEM30A	FALSE	FALSE	6.7286	38.4385	6.96472	11.4329	3.08923	0.353143	0.999999	0.000895213	5.71271	1.03509	1.69915	0.459119	5.51903	FALSE	FALSE	FALSE
NM_025041.2	chromosome 3 open reading frame 36 (C3orf36)	C3orf36	FALSE	FALSE	18.0003	102.814	60.2769	30.5804	26.7361	0.315622	0.999999	0.291963	5.71182	3.34867	1.69888	1.48531	1.7057	FALSE	FALSE	FALSE
NM_002401.2	Mitogen-activated protein kinase kinase kinase 3	MAP3K3	FALSE	FALSE	16.5098	94.23	53.6605	28.0271	23.8013	0.0695196	0.999999	0.150374	5.70751	3.25022	1.6976	1.44165	1.75604	FALSE	FALSE	FALSE
BC030516.1	La ribonucleoprotein domain family, member 2 (LARP2)	LARP1B	FALSE	FALSE	13.5905	77.5635	42.1688	23.0699	18.7041	0.547084	0.999999	0.405864	5.7072	3.10282	1.69751	1.37627	1.83936	FALSE	FALSE	FALSE
BC004117.1	dehydrodolichyl diphosphate synthase (DHDDS)	DHDDS	FALSE	FALSE	3.05771	17.4489	5.13885	5.18988	2.27936	0.414328	0.999999	0.00812548	5.70654	1.68062	1.69731	0.745446	3.39549	FALSE	FALSE	FALSE
NM_001003675.1	Chromosome 18 open reading frame 1 (C18orf1), transcript variant c2, mRNA	LDLRAD4	FALSE	FALSE	18.0272	102.856	54.4744	30.5927	24.1623	0.0256255	0.999999	0.0136938	5.70558	3.02179	1.69703	1.34033	1.88815	FALSE	FALSE	FALSE
NM_006202.1	phosphodiesterase 4A, cAMP-specific (phosphodiesterase E2 dunce homolog, Drosophila) (PDE4A)	PDE4A	FALSE	FALSE	1.36902	7.80749	44.0361	2.3222	19.5324	0.37721	0.499623	0.269278	5.70297	32.1661	1.69625	14.2674	0.177297	FALSE	FALSE	FALSE
BC003656.1	minichromosome maintenance complex component 5 (MCM5)	MCM5	FALSE	FALSE	5.24347	29.9015	11.4784	8.8937	5.09129	0.03314	0.999999	0.00482829	5.70263	2.18909	1.69615	0.970978	2.60503	FALSE	FALSE	FALSE
BC056872.1	Nuclear receptor coactivator 5	NCOA5	FALSE	FALSE	15.6716	89.3353	40.4955	26.5713	17.9619	0.191415	0.999999	0.143031	5.70044	2.584	1.6955	1.14614	2.20606	FALSE	FALSE	FALSE
BC003360.1	DEAD (Asp-Glu-Ala-Asp) box polypeptide 18 (DDX18)	DDX18	FALSE	FALSE	5.74956	32.7665	9.01655	9.74584	3.99932	0.0579963	0.999999	0.00032916	5.69897	1.56822	1.69506	0.695588	3.63405	FALSE	FALSE	FALSE
NM_145251.2	serine/threonine/tyrosine interacting protein (STYX)	STYX	FALSE	FALSE	9.51871	54.2362	22.1791	16.1316	9.83764	0.622347	0.999999	0.203171	5.69785	2.33006	1.69473	1.03351	2.44537	FALSE	FALSE	FALSE
NM_005246.1	Proto-oncogene tyrosine-protein kinase FER	FER	FALSE	FALSE	12.5643	71.5669	26.9599	21.2864	11.9582	0.156743	0.999999	0.0769975	5.69607	2.14576	1.6942	0.951759	2.65457	FALSE	FALSE	FALSE
NM_001673.2	asparagine synthetase (ASNS), transcript variant 2	ASNS	FALSE	FALSE	11.503	65.5213	34.9091	19.4882	15.4841	0.343459	0.999999	0.223677	5.69603	3.03479	1.69419	1.34609	1.87691	FALSE	FALSE	FALSE
BC016389.1	chromosome 2 open reading frame 18 (C2orf18)	SLC35F6	FALSE	FALSE	16.5417	94.2023	62.278	28.0189	27.6236	0.591884	0.999999	0.370337	5.69484	3.76491	1.69383	1.66994	1.51261	FALSE	FALSE	FALSE
NM_198183.1	ubiquitin-conjugating enzyme E2L 6 (UBE2L6), transcript variant 2	UBE2L6	FALSE	FALSE	5.22102	29.7219	12.369	8.84027	5.48632	0.634685	0.999999	0.0704646	5.69274	2.36908	1.69321	1.05081	2.40293	FALSE	FALSE	FALSE
NM_033387.2	family with sequence similarity 78, member A (FAM78A)	FAM78A	FALSE	FALSE	15.8668	90.3232	43.7043	26.8651	19.3852	0.475819	0.999999	0.0545433	5.69258	2.75444	1.69316	1.22174	2.06669	FALSE	FALSE	FALSE
NM_019021.1	chromosome 11 open reading frame 71 (C11orf71)	C11orf71	FALSE	FALSE	6.71936	38.2411	16.5245	11.3742	7.3295	0.375495	0.999999	0.0970329	5.69119	2.45924	1.69275	1.0908	2.31421	FALSE	FALSE	FALSE
BC008429.1	chromosome 20 open reading frame 114 (C20orf114)	BPIFB1	FALSE	FALSE	4.82035	27.4018	9.67365	8.15019	4.29078	0.0202129	0.999999	0.00123578	5.68461	2.00684	1.69079	0.89014	2.83262	FALSE	FALSE	FALSE
P02649	APOE / apolipoprotein E Protein (N-Trx & His)	APOE	FALSE	FALSE	1.5782	8.97096	4.05934	2.66826	1.80054	0.0700422	0.999999	0.00812988	5.68429	2.57213	1.69069	1.14088	2.20995	FALSE	FALSE	FALSE
NM_016511.1	C-type lectin domain family 1, member A (CLEC1A)	CLEC1A	FALSE	FALSE	10.4922	59.6386	31.8685	17.7385	14.1354	0.0440672	0.999999	0.124591	5.68408	3.03735	1.69063	1.34723	1.8714	FALSE	FALSE	FALSE
NM_006924.3	splicing factor, arginine/serine-rich 1 (splicing factor 2, alternate splicing factor) (SFRS1), transcript variant 1	SRSF1	FALSE	FALSE	12.2129	69.4158	31.5404	20.6465	13.9899	0.0589912	0.999999	0.015661	5.68383	2.58256	1.69056	1.1455	2.20085	FALSE	FALSE	FALSE
NM_006763.2	BTG family, member 2 (BTG2)	BTG2	FALSE	FALSE	10.1999	57.9641	32.9213	17.2404	14.6024	0.339934	0.999999	0.311686	5.6828	3.22761	1.69025	1.43162	1.76069	FALSE	FALSE	FALSE
BC059366.1	BTB/POZ domain-containing protein KCTD18	KCTD18	FALSE	FALSE	13.4639	76.5062	38.7227	22.7554	17.1756	0.346875	0.999999	0.271304	5.6823	2.87603	1.6901	1.27567	1.97575	FALSE	FALSE	FALSE
NM_001504.1	chemokine (C-X-C motif) receptor 3 (CXCR3)	CXCR3	FALSE	FALSE	3.59836	20.4409	4.3185	6.07979	1.91548	0.13766	0.999999	0.00217009	5.68061	1.20013	1.6896	0.532322	4.73333	FALSE	FALSE	FALSE
NM_016618.1	lysine-rich coiled-coil 1 (KRCC1)	KRCC1	FALSE	FALSE	5.47102	31.0755	11.3099	9.24286	5.01656	0.155609	0.999999	0.00129616	5.68002	2.06725	1.68942	0.916934	2.74762	FALSE	FALSE	FALSE
BC014264.2	chromosome 19 open reading frame 33 (C19orf33)	C19orf33	FALSE	FALSE	21.6915	123.187	9.44796	36.6399	4.19068	0.0555158	0.999999	0	5.67905	0.43556	1.68913	0.193194	13.0385	FALSE	FALSE	FALSE
NM_201278.1	myotubularin related protein 2 (MTMR2), transcript variant 2	MTMR2	FALSE	FALSE	13.9907	79.4485	40.9557	23.6306	18.166	0.364974	0.999999	0.151647	5.67867	2.92735	1.68902	1.29844	1.93987	FALSE	FALSE	FALSE
NM_004217.1	aurora kinase B (AURKB)	AURKB	FALSE	FALSE	17.5785	99.7817	51.779	29.6784	22.9668	0.285165	0.999999	0.0947353	5.67636	2.94559	1.68833	1.30653	1.92707	FALSE	FALSE	FALSE
BC014218.2	THAP domain-containing protein 3	LOC100129138	FALSE	FALSE	12.6005	71.5161	21.601	21.2712	9.58119	0.0805145	0.999999	0.0261247	5.67566	1.7143	1.68813	0.760383	3.31078	FALSE	FALSE	FALSE
BC053876.1	transmembrane and coiled-coil domain family 2 (TMCC2)	TMCC2	FALSE	FALSE	5.79208	32.8714	11.6006	9.77704	5.14547	0.0554499	0.999999	0.00603053	5.67524	2.00283	1.688	0.888363	2.83361	FALSE	FALSE	FALSE
NM_004066.1	centrin, EF-hand protein, 1 (CETN1)	CETN1	FALSE	FALSE	5.31198	30.1258	10.9935	8.96039	4.87621	0.280621	0.999999	0.0460528	5.67129	2.06957	1.68683	0.917966	2.74032	FALSE	FALSE	FALSE
BC049216.1	AHNAK nucleoprotein 2 (AHNAK2)	AHNAK2	FALSE	TRUE	24.2492	137.478	88.6429	40.8904	39.3179	0.060262	0.865038	0.257515	5.66937	3.6555	1.68626	1.62141	1.55092	FALSE	FALSE	FALSE
NM_001269.2	regulator of chromosome condensation 1 (RCC1), transcript variant 3	RCC1	FALSE	FALSE	12.2283	69.3266	34.594	20.62	15.3443	0.0200518	0.999999	0.0533167	5.66936	2.82901	1.68625	1.25482	2.00401	FALSE	FALSE	FALSE
BC005008.1	carcinoembryonic antigen-related cell adhesion molecule 6 (non-specific cross reacting antigen) (CEACAM6)	CEACAM6	FALSE	FALSE	6.57112	37.2282	16.1248	11.0729	7.15223	0.0360927	0.999999	0.0290919	5.66542	2.4539	1.68508	1.08843	2.30875	FALSE	FALSE	FALSE
NM_002140.2	heterogeneous nuclear ribonucleoprotein K (HNRPK), transcript variant 1	HNRNPK	FALSE	FALSE	12.5045	70.8425	33.9424	21.0709	15.0553	0.310779	0.999999	0.174957	5.66537	2.71441	1.68506	1.20399	2.08714	FALSE	FALSE	FALSE
BC010919.1	ribosomal protein L35 (RPL35)	RPL35	FALSE	FALSE	6.06234	34.3377	13.9222	10.2132	6.17523	0.387215	0.999999	0.115901	5.6641	2.2965	1.68469	1.01862	2.46641	FALSE	FALSE	FALSE
NM_005746.1	pre-B-cell colony enhancing factor 1 (PBEF1)	NAMPT	FALSE	FALSE	11.3171	64.0754	32.8239	19.0581	14.5592	0.102959	0.999999	0.205663	5.66181	2.90038	1.68401	1.28647	1.9521	FALSE	FALSE	FALSE
BC101303.1	F-box and WD-40 domain protein 12, mRNA (cDNA clone MGC:120385 IMAGE:40024696), complete cds	FBXW12	FALSE	FALSE	6.29469	35.6333	13.4357	10.5985	5.95946	0.105622	0.999999	0.0096072	5.66085	2.13445	1.68372	0.946744	2.65213	FALSE	FALSE	FALSE
BC020966.1	Ectonucleoside triphosphate diphosphohydrolase 5	ENTPD5	FALSE	FALSE	5.29448	29.9675	11.3026	8.91332	5.0133	0.063282	0.999999	0.00496824	5.66014	2.13478	1.68351	0.946891	2.65139	FALSE	FALSE	FALSE
NM_024854.2	pyridine nucleotide-disulphide oxidoreductase domain 1 (PYROXD1)	PYROXD1	FALSE	FALSE	11.4773	64.9419	44.7396	19.3159	19.8444	0.28507	0.999999	0.503844	5.65828	3.89808	1.68296	1.72901	1.45155	FALSE	FALSE	FALSE
BC006177.1	Metastasis-associated protein MTA1	MTA1	FALSE	TRUE	4.68365	26.4958	11.8914	7.88071	5.27445	0.0585891	0.999999	0.0119401	5.65709	2.53891	1.6826	1.12614	2.22816	FALSE	FALSE	FALSE
BC036511.1	Homeobox protein Meis1	MEIS1	FALSE	FALSE	14.4826	81.8814	43.9365	24.3542	19.4882	0.222877	0.999999	0.0918025	5.65378	3.03374	1.68162	1.34563	1.86363	FALSE	FALSE	FALSE
NM_139246.3	chromosome 9 open reading frame 97 (C9orf97)	TSTD2	FALSE	FALSE	10.6784	60.3579	31.3058	17.9524	13.8858	0.325324	0.999999	0.207203	5.65236	2.93171	1.6812	1.30037	1.92801	FALSE	FALSE	FALSE
BC028113.1	glutaredoxin 2 (GLRX2)	GLRX2	FALSE	FALSE	9.40953	53.1748	14.4229	15.8159	6.39735	0.142554	0.999999	0.00363656	5.65117	1.5328	1.68084	0.67988	3.68682	FALSE	FALSE	FALSE
NM_015343.1	dullard homolog (Xenopus laevis) (DULLARD)	CTDNEP1	FALSE	FALSE	8.16602	46.0971	17.4113	13.7108	7.72285	0.0210634	0.999999	0.00341947	5.64499	2.13216	1.679	0.94573	2.64754	FALSE	FALSE	FALSE
NM_138809.1	Carboxymethylenebutenolidase homolog	CMBL	FALSE	FALSE	8.80214	49.6554	26.8933	14.7691	11.9286	0.834636	0.999999	0.518186	5.64128	3.05531	1.6779	1.3552	1.84639	FALSE	FALSE	FALSE
BC050711.2	Seven transmembrane domain orphan receptor, mRNA (cDNA clone MGC:60321 IMAGE:6168632), complete cds	TPRA1	FALSE	FALSE	5.4321	30.6418	11.3613	9.11389	5.03934	0.0602923	0.999999	0.00270356	5.64088	2.09151	1.67778	0.927697	2.69704	FALSE	FALSE	FALSE
BC035314.1	brix domain containing 1 (BXDC1)	RPF2	FALSE	FALSE	5.05512	28.4854	12.5532	8.4725	5.56804	0.0148938	0.999999	0.00151224	5.63497	2.48327	1.67602	1.10147	2.26917	FALSE	FALSE	FALSE
NM_002095.1	general transcription factor IIE, polypeptide 2, beta 34kDa (GTF2E2)	GTF2E2	FALSE	FALSE	8.56236	48.2477	20.9954	14.3504	9.31259	0.0236983	0.999999	0.0057036	5.63486	2.45206	1.67599	1.08762	2.29801	FALSE	FALSE	FALSE
NM_017988.1	SCY1-like protein 2	SCYL2	FALSE	TRUE	4.97267	28.0061	9.54419	8.32992	4.23336	0.0257934	0.999999	0.00032916	5.632	1.91933	1.67514	0.851325	2.93436	FALSE	FALSE	FALSE
BC043388.1	Protein phosphatase 1, regulatory (inhibitor) subunit 3B, mRNA (cDNA clone MGC:50661 IMAGE:6150188), complete cds	PPP1R3B	FALSE	FALSE	3.15993	17.7861	5.4512	5.29017	2.4179	0.0565266	0.999999	5.14003e-05	5.62864	1.7251	1.67414	0.765176	3.26278	FALSE	FALSE	FALSE
BC032747.1	Melanoregulin	MREG	FALSE	FALSE	11.001	61.8965	37.0554	18.41	16.436	0.775224	0.999999	0.55344	5.62642	3.36835	1.67348	1.49404	1.67038	FALSE	FALSE	FALSE
NM_012214.1	Mannosyl (alpha-1,3-)-glycoprotein beta-1,4-N-acetylglucosaminyltransferase, isoenzyme A (MGAT4A), mRNA	MGAT4A	FALSE	FALSE	5.2082	29.3025	11.0651	8.71551	4.90796	0.202295	0.999999	0.00801037	5.62621	2.12455	1.67342	0.942353	2.64819	FALSE	FALSE	FALSE
NM_001799.2	cyclin-dependent kinase 7	CDK7	FALSE	FALSE	12.2281	68.7834	32.0111	20.4584	14.1986	0.120017	0.999999	0.0335194	5.62501	2.61782	1.67306	1.16115	2.14874	FALSE	FALSE	FALSE
BC063463.1	coenzyme Q3 homolog, methyltransferase (S. cerevisiae) (COQ3)	COQ3	FALSE	FALSE	10.2142	57.4314	32.5555	17.082	14.4401	0.092996	0.999999	0.140388	5.6227	3.18727	1.67237	1.41373	1.76411	FALSE	FALSE	FALSE
NM_152489.1	ubiquitin-conjugating enzyme E2U (putative) (UBE2U)	UBE2U	FALSE	FALSE	5.88704	33.0985	12.7915	9.84458	5.67374	0.0252165	0.999999	0.000895213	5.62227	2.17283	1.67225	0.963767	2.58753	FALSE	FALSE	FALSE
BC096265.2	Vanin 1, mRNA (cDNA clone MGC:116930 IMAGE:40006204), complete cds	VNN1	FALSE	FALSE	7.32495	41.1562	15.7665	12.2412	6.99329	0.0289569	0.999999	0.00059609	5.61863	2.15244	1.67116	0.954722	2.61035	FALSE	FALSE	FALSE
NM_078625.2	vanin 3 (VNN3), transcript variant 2	VNN3	FALSE	FALSE	8.37567	47.056	27.8176	13.996	12.3386	0.248017	0.999999	0.272732	5.61817	3.32124	1.67103	1.47315	1.69159	FALSE	FALSE	FALSE
BC015202.1	Centromere protein T	CENPT	FALSE	FALSE	17.1249	96.2086	62.6168	28.6156	27.7739	0.0543066	0.654944	0.333188	5.61805	3.65648	1.67099	1.62184	1.53647	FALSE	FALSE	FALSE
NM_030673.1	SEC13-like 1 (S. cerevisiae) (SEC13L1), transcript variant 1	SEC13	FALSE	FALSE	9.79474	54.9911	35.3	16.3562	15.6574	0.393188	0.999999	0.23833	5.61435	3.60397	1.66989	1.59855	1.55782	FALSE	FALSE	FALSE
BC030229.1	glycoprotein IX (platelet) (GP9)	GP9	FALSE	FALSE	12.029	67.5332	38.6137	20.0866	17.1272	0.304532	0.999999	0.401642	5.6142	3.21005	1.66985	1.42383	1.74894	FALSE	FALSE	FALSE
BC017570.1	chromosome 9 open reading frame 78 (C9orf78)	C9orf78	FALSE	FALSE	21.4982	120.69	47.3293	35.8972	20.9931	0.0172181	0.999999	0.00467781	5.61395	2.20154	1.66977	0.976503	2.55001	FALSE	FALSE	FALSE
BC032578.1	WD repeat domain 19 (WDR19)	WDR19	FALSE	FALSE	8.56585	48.0838	20.5806	14.3017	9.1286	0.163507	0.999999	0.0329583	5.61343	2.40263	1.66962	1.0657	2.33636	FALSE	FALSE	FALSE
NM_016041.1	Der1-like domain family, member 2 (DERL2)	DERL2	FALSE	FALSE	4.62199	25.9281	8.52165	7.71186	3.77981	0.134655	0.999999	0.000481596	5.60972	1.84372	1.66852	0.817788	3.04261	FALSE	FALSE	FALSE
BC033491.1	adenosine deaminase domain containing 2 (ADAD2)	ADAD2	FALSE	FALSE	10.7002	60.0169	25.6258	17.851	11.3664	0.117982	0.999999	0.0111952	5.60894	2.39488	1.66828	1.06226	2.34205	FALSE	FALSE	FALSE
NM_018091.2	elongation protein 3 homolog (S. cerevisiae) (ELP3)	ELP3	FALSE	FALSE	9.32169	52.278	22.8414	15.5492	10.1314	0.0788697	0.999999	0.0340263	5.60821	2.45035	1.66807	1.08686	2.28874	FALSE	FALSE	FALSE
BC005272.1	Matrix Gla protein, mRNA (cDNA clone MGC:12316 IMAGE:3930143), complete cds	MGP	FALSE	FALSE	2.52005	14.129	6.65186	4.20243	2.95046	0.763388	0.999999	0.379398	5.60665	2.63958	1.6676	1.17079	2.12407	FALSE	FALSE	FALSE
NM_001008711.1	RNA-binding protein with multiple splicing	RBPMS	FALSE	FALSE	19.6088	109.919	59.2217	32.6934	26.268	0.0909892	0.999999	0.1082	5.60557	3.02016	1.66728	1.3396	1.85605	FALSE	FALSE	FALSE
NM_001985.2	electron-transfer-flavoprotein, beta polypeptide (ETFB), transcript variant 1	ETFB	FALSE	FALSE	21.4595	120.201	75.7484	35.7518	33.5985	0.235237	0.999999	0.368545	5.60131	3.52984	1.66601	1.56567	1.58685	FALSE	FALSE	FALSE
NM_133341.1	RAD17 homolog (S. pombe) (RAD17), transcript variant 4	RAD17	FALSE	FALSE	6.60486	36.9921	13.079	11.0027	5.80123	0.0309876	0.999999	0.00278095	5.60075	1.98021	1.66585	0.878329	2.82836	FALSE	FALSE	FALSE
NM_000992.2	60S ribosomal protein L29	RPL29	FALSE	FALSE	8.47997	47.4807	28.5536	14.1223	12.665	0.0755549	0.999999	0.0344107	5.59915	3.36718	1.66537	1.49352	1.66286	FALSE	FALSE	FALSE
NM_138796.1	spermatogenesis associated 17 (SPATA17)	SPATA17	FALSE	FALSE	4.93814	27.6424	8.97131	8.22177	3.97926	0.280769	0.999999	0.00849199	5.59774	1.81674	1.66495	0.80582	3.08121	FALSE	FALSE	FALSE
NM_003953.4	myelin protein zero-like 1 (MPZL1), transcript variant 1	MPZL1	FALSE	FALSE	8.1292	45.4987	22.3296	13.5328	9.90437	0.202767	0.999999	0.122925	5.59695	2.74684	1.66472	1.21837	2.0376	FALSE	FALSE	FALSE
BC094719.1	Rho GTPase-activating protein 12	ARHGAP12	FALSE	FALSE	24.3424	136.189	89.05	40.5072	39.4984	0.0952855	0.999999	0.264449	5.59475	3.65823	1.66406	1.62262	1.52936	FALSE	FALSE	FALSE
BC003624.1	interferon gamma receptor 2 (interferon gamma transducer 1) (IFNGR2)	IFNGR2	FALSE	FALSE	13.5854	75.9884	25.365	22.6014	11.2507	0.64267	0.999999	0.0340049	5.59339	1.86708	1.66366	0.828149	2.9958	FALSE	FALSE	FALSE
BC014194.1	T-box 22 (TBX22)	TBX22	FALSE	FALSE	4.88786	27.3351	9.80722	8.13035	4.35003	0.038944	0.999999	0.00216963	5.59245	2.00644	1.66338	0.889966	2.78724	FALSE	FALSE	FALSE
NM_033414.1	zinc finger protein 622 (ZNF622)	ZNF622	FALSE	FALSE	15.2856	85.469	27.9426	25.4213	12.394	0.180444	0.999999	0.0319766	5.59146	1.82803	1.66308	0.810829	3.05873	FALSE	FALSE	FALSE
NM_019863.1	coagulation factor VIII, procoagulant component (hemophilia A) (F8), transcript variant 2	F8	FALSE	FALSE	6.95926	38.8744	10.6745	11.5625	4.73471	0.0382614	0.999999	0.00363656	5.58599	1.53386	1.66146	0.680348	3.6418	FALSE	FALSE	FALSE
NM_014734.2	KIAA0247 (KIAA0247)	SUSD6	FALSE	FALSE	20.1777	112.591	65.6017	33.4882	29.0979	0.773571	0.999999	0.385166	5.57997	3.2512	1.65967	1.44208	1.71628	FALSE	FALSE	FALSE
BC021573.1	GTP-binding protein 10	GTPBP10	FALSE	FALSE	7.36556	41.094	17.9896	12.2227	7.97935	0.0645395	0.999999	0.0229661	5.57921	2.44239	1.65944	1.08333	2.28432	FALSE	FALSE	FALSE
BC042607.1	protein disulfide isomerase-like protein of the testis (PDILT)	PDILT	FALSE	FALSE	5.64529	31.4927	11.3071	9.36695	5.01531	0.076821	0.999999	0.0264645	5.57857	2.00293	1.65925	0.888405	2.78521	FALSE	FALSE	FALSE
NM_001487.1	Biogenesis of lysosome-related organelles complex 1 subunit 1	BLOC1S1	FALSE	FALSE	10.116	56.4162	21.7883	16.78	9.66428	0.761845	0.999999	0.386025	5.57694	2.15385	1.65876	0.955349	2.58929	FALSE	FALSE	FALSE
BC101026.2	Spindle assembly abnormal protein 6 homolog	SASS6	FALSE	FALSE	115.35	643.072	286.606	191.271	127.125	0.0930139	0.999999	0.0162027	5.57495	2.48466	1.65817	1.10208	2.24375	FALSE	FALSE	FALSE
BC014315.1	small nuclear RNA activating complex, polypeptide 5, 19kDa (SNAPC5)	SNAPC5	FALSE	FALSE	7.53548	41.9819	16.9464	12.4868	7.51663	0.0127555	0.999999	0.00292357	5.57123	2.24888	1.65707	0.997499	2.47734	FALSE	FALSE	FALSE
NM_016231.2	nemo-like kinase (NLK)	NLK	FALSE	FALSE	9.6275	53.629	26.9626	15.951	11.9594	0.170585	0.999999	0.159164	5.57039	2.80059	1.65682	1.24221	1.98901	FALSE	FALSE	FALSE
NM_014281.3	Poly(U)-binding-splicing factor PUF60	PUF60	FALSE	FALSE	12.5049	69.6532	43.9337	20.7171	19.487	0.506304	0.999999	0.43849	5.57007	3.51332	1.65672	1.55835	1.58542	FALSE	FALSE	FALSE
NM_015886.3	peptidase inhibitor 15 (PI15)	PI15	FALSE	FALSE	6.14152	34.2071	13.3733	10.1743	5.93177	0.0262159	0.999999	0.00270356	5.56981	2.17752	1.65664	0.965847	2.55787	FALSE	FALSE	FALSE
NM_178815.2	ADP-ribosylation factor-like 5B (ARL5B)	ARL5B	FALSE	FALSE	9.32518	51.9308	30.586	15.4459	13.5665	0.871858	0.999999	0.430358	5.56887	3.27994	1.65636	1.45483	1.69786	FALSE	FALSE	FALSE
NM_020239.2	CDC42 small effector 1 (CDC42SE1), transcript variant 2	CDC42SE1	FALSE	FALSE	1.49036	8.29424	2.80892	2.46698	1.24591	0.350889	0.999999	0.0267158	5.56527	1.88473	1.65529	0.835979	2.95282	FALSE	FALSE	FALSE
NM_002279.3	keratin 33B (KRT33B)	KRT33B	FALSE	FALSE	6.7603	37.6119	14.9492	11.187	6.63077	0.0312823	0.999999	0.00270356	5.56364	2.21132	1.65481	0.980839	2.51598	FALSE	FALSE	FALSE
NM_020142.2	NADH dehydrogenase (ubiquinone) 1 alpha subcomplex, 4-like 2 (NDUFA4L2)	NDUFA4L2	FALSE	FALSE	10.846	60.2925	31.7009	17.933	14.061	0.156743	0.999999	0.0523673	5.55897	2.92282	1.65342	1.29643	1.90192	FALSE	FALSE	FALSE
BC029541.1	leucine zipper-EF-hand containing transmembrane protein 2 (LETM2)	LETM2	FALSE	FALSE	20.5175	114.045	49.4476	33.9208	21.9327	0.126041	0.999999	0.00772251	5.55844	2.41002	1.65326	1.06897	2.30639	FALSE	FALSE	FALSE
NM_006756.2	transcription elongation factor A (SII), 1 (TCEA1), transcript variant 1	TCEA1	FALSE	FALSE	12.5517	69.7356	45.361	20.7416	20.12	0.18016	0.999999	0.374775	5.55586	3.61393	1.65249	1.60297	1.53735	FALSE	FALSE	FALSE
NM_014214.1	inositol(myo)-1(or 4)-monophosphatase 2 (IMPA2)	IMPA2	FALSE	FALSE	11.2693	62.6108	30.4391	18.6225	13.5014	0.302974	0.999999	0.330881	5.55585	2.70105	1.65249	1.19806	2.05692	FALSE	FALSE	FALSE
BC013955.2	Fibroblast growth factor receptor-like 1	FGFRL1	FALSE	FALSE	18.8176	104.481	49.8833	31.0761	22.1259	0.14534	0.999999	0.163022	5.55231	2.65088	1.65144	1.17581	2.09451	FALSE	FALSE	FALSE
NM_021034.1	Interferon-induced transmembrane protein 3	IFITM3	FALSE	FALSE	11.752	65.2148	26.4016	19.397	11.7105	0.345442	0.999999	0.181705	5.54926	2.24657	1.65053	0.996475	2.4701	FALSE	FALSE	FALSE
NM_004830.2	Mediator of RNA polymerase II transcription subunit 23	MED23	FALSE	FALSE	12.0387	66.7772	23.2391	19.8617	10.3078	0.0360927	0.999999	0.00578422	5.54687	1.93036	1.64982	0.856219	2.87348	FALSE	FALSE	FALSE
BC058906.1	aarF domain containing kinase 1 (ADCK1)	ADCK1	FALSE	FALSE	7.23654	40.1253	15.1093	11.9346	6.70178	0.0248966	0.999999	0.00303802	5.54482	2.08792	1.64921	0.926104	2.65567	FALSE	FALSE	FALSE
NM_002625.1	6-phosphofructo-2-kinase/fructose-2,6-biphosphatase 1	PFKFB1	FALSE	FALSE	10.7308	59.4857	30.644	17.693	13.5923	0.115347	0.895634	0.336732	5.54347	2.85572	1.64881	1.26666	1.94119	FALSE	FALSE	FALSE
NM_205854.1	Surfactant associated protein G (SFTPG), mRNA	SFTA2	FALSE	FALSE	5.87424	32.561	8.91491	9.68471	3.95424	0.259375	0.999999	0.00754075	5.54302	1.51763	1.64868	0.67315	3.65242	FALSE	FALSE	FALSE
NM_018064.1	chromosome 6 open reading frame 166 (C6orf166)	AKIRIN2	FALSE	FALSE	7.22032	40.0152	24.4534	11.9018	10.8464	0.134806	0.999999	0.216538	5.54203	3.38675	1.64838	1.50221	1.63638	FALSE	FALSE	FALSE
NM_012383.2	osteoclast stimulating factor 1 (OSTF1)	OSTF1	FALSE	FALSE	12.1004	67.0438	33.6248	19.941	14.9144	0.760497	0.999999	0.408067	5.54062	2.77881	1.64796	1.23255	1.99388	FALSE	FALSE	FALSE
NM_182826.1	Scavenger receptor class A member 3	SCARA3	FALSE	FALSE	7.34387	40.6894	14.3434	12.1024	6.36208	0.120921	0.999999	0.0160784	5.5406	1.95312	1.64795	0.866312	2.8368	FALSE	FALSE	FALSE
NM_001715.2	B lymphoid tyrosine kinase (BLK)	BLK	FALSE	FALSE	15.1211	83.7798	37.3369	24.9189	16.5609	0.299824	0.999999	0.0421902	5.54057	2.46919	1.64795	1.09522	2.24389	FALSE	FALSE	FALSE
NM_173456.1	phosphodiesterase 8A (PDE8A), transcript variant 4	PDE8A	FALSE	FALSE	7.97639	44.1736	18.8309	13.1387	8.35253	0.0152475	0.999999	0.00079025	5.53804	2.36083	1.6472	1.04716	2.3458	FALSE	FALSE	FALSE
NM_020892.1	Deltex homolog 2 (Drosophila) (DTX2), mRNA	DTX2	FALSE	FALSE	8.15644	45.1386	23.2065	13.4257	10.2933	0.0148745	0.999999	0.0189264	5.53411	2.84518	1.64602	1.26199	1.94508	FALSE	FALSE	FALSE
NM_004059.3	cysteine conjugate-beta lyase; cytoplasmic (glutamine transaminase K, kyneurenine aminotransferase) (CCBL1)	KYAT1	FALSE	FALSE	7.55306	41.7851	15.9185	12.4283	7.06073	0.00922339	0.999999	0.00123775	5.53221	2.10756	1.64546	0.934817	2.62493	FALSE	FALSE	FALSE
BC000578.1	hypoxanthine phosphoribosyltransferase 1 (Lesch-Nyhan syndrome) (HPRT1)	HPRT1	FALSE	FALSE	10.7468	59.4489	19.5801	17.682	8.68484	0.245478	0.999999	0.00733604	5.53179	1.82196	1.64534	0.808135	3.03618	FALSE	FALSE	FALSE
BC036301.1	Transmembrane protein 192	TMEM192	FALSE	FALSE	6.41132	35.466	15.0669	10.5488	6.68298	0.100378	0.999999	0.0144803	5.53178	2.35005	1.64533	1.04237	2.3539	FALSE	FALSE	FALSE
NM_153364.1	family with sequence similarity 71, member C (FAM71C)	FAM71C	FALSE	FALSE	25.5378	141.256	79.3921	42.0142	35.2147	0.352601	0.961135	0.5205	5.53125	3.1088	1.64517	1.37892	1.77922	FALSE	FALSE	FALSE
NM_057157.1	cytochrome P450, family 26, subfamily A, polypeptide 1 (CYP26A1), transcript variant 2	CYP26A1	FALSE	FALSE	6.35338	35.1344	13.1152	10.4501	5.81728	0.111375	0.999999	0.00837085	5.53004	2.06428	1.64481	0.915621	2.67891	FALSE	FALSE	FALSE
NM_001906.1	chymotrypsinogen B1 (CTRB1)	CTRB1	FALSE	FALSE	5.28769	29.1977	9.70908	8.68434	4.3065	0.0784454	0.999999	0.00032916	5.52182	1.83617	1.64237	0.814438	3.00725	FALSE	FALSE	FALSE
BC101305.1	F-box and WD-40 domain protein 12, mRNA (cDNA clone MGC:120387 IMAGE:40024702), complete cds	FBXW12	FALSE	FALSE	11.1622	61.6185	41.9926	18.3273	18.626	0.305674	0.999999	0.475146	5.52029	3.76204	1.64192	1.66867	1.46737	FALSE	FALSE	FALSE
NM_005148.2	unc-119 homolog (C. elegans) (UNC119), transcript variant 1	UNC119	FALSE	FALSE	8.16736	45.0726	27.4106	13.4061	12.1581	0.239327	0.999999	0.469004	5.51862	3.35612	1.64142	1.48862	1.64435	FALSE	FALSE	FALSE
NM_024668.1	ankyrin repeat and KH domain containing 1 (ANKHD1), transcript variant 3	ANKHD1	FALSE	TRUE	16.0165	88.3652	75.9718	26.2827	33.6976	0.484178	0.777046	0.590397	5.51713	4.74334	1.64097	2.10393	1.16313	FALSE	FALSE	FALSE
NM_201433.1	Growth arrest-specific 7 (GAS7), transcript variant c, mRNA	GAS7	FALSE	FALSE	17.4084	96.0398	50.3073	28.5654	22.314	0.305664	0.999999	0.289804	5.51688	2.88983	1.6409	1.2818	1.90906	FALSE	FALSE	FALSE
NM_018439.1	Impact homolog (mouse) (IMPACT)	IMPACT	FALSE	FALSE	8.33781	45.9961	28.1688	13.6807	12.4944	0.11388	0.999999	0.127359	5.51657	3.37844	1.64081	1.49852	1.63288	FALSE	FALSE	FALSE
NM_014713.2	lysosomal-associated protein transmembrane 4 alpha (LAPTM4A)	LAPTM4A	FALSE	FALSE	3.96226	21.8547	7.10728	6.50029	3.15246	0.0172181	0.999999	0.00032916	5.5157	1.79374	1.64055	0.795621	3.07497	FALSE	FALSE	FALSE
BC000691.1	tubulin polymerization-promoting protein family member 3 (TPPP3)	TPPP3	FALSE	TRUE	12.7463	70.2273	25.0199	20.8879	11.0977	0.087628	0.999999	0.0259558	5.50964	1.96292	1.63875	0.87066	2.80686	FALSE	FALSE	FALSE
NM_002966.1	S100 calcium binding protein A10 (S100A10)	S100A10	FALSE	FALSE	12.7169	70.0466	33.8111	20.8342	14.997	0.289236	0.999999	0.210667	5.50816	2.65876	1.63831	1.1793	2.0717	FALSE	FALSE	FALSE
NM_001422.1	E74-like factor 5 (ets domain transcription factor) (ELF5), transcript variant 2	ELF5	FALSE	FALSE	9.98128	54.9742	33.9055	16.3511	15.0389	0.211176	0.999999	0.170761	5.50773	3.39691	1.63818	1.50671	1.62139	FALSE	FALSE	FALSE
BC039269.1	NLR family, pyrin domain containing 2 (NLRP2)	NLRP2	FALSE	FALSE	8.97847	49.4486	25.5806	14.7076	11.3464	0.0810424	0.999999	0.212171	5.50746	2.84911	1.6381	1.26373	1.93305	FALSE	FALSE	FALSE
ENST00000362035	Isoprenylcysteine carboxyl methyltransferase (ICMT), transcript variant 2, mRNA	ICMT	FALSE	FALSE	4.58452	25.2488	7.5731	7.50981	3.35908	0.266857	0.999999	0.00456598	5.50739	1.65188	1.63808	0.7327	3.33401	FALSE	FALSE	FALSE
BC044851.1	vacuolar protein sorting 41 homolog (S. cerevisiae) (VPS41)	VPS41	FALSE	FALSE	7.21997	39.7505	19.5368	11.8231	8.66564	0.603792	0.999999	0.233633	5.50563	2.70594	1.63756	1.20023	2.03464	FALSE	FALSE	FALSE
BC020605.1	Protein CARP	FAM188A	FALSE	FALSE	3.15234	17.3456	13.7187	5.15914	6.085	0.850286	0.999999	0.527699	5.50244	4.35193	1.63661	1.93031	1.26437	FALSE	FALSE	FALSE
BC009674.1	Yip1 domain family, member 1 (YIPF1)	YIPF1	FALSE	FALSE	3.82546	21.0348	6.99664	6.25645	3.10338	0.0261553	0.999999	0	5.49864	1.82896	1.63548	0.811244	3.00642	FALSE	FALSE	FALSE
BC033856.1	La ribonucleoprotein domain family, member 1 (LARP1)	LARP1	FALSE	TRUE	14.9873	82.3946	37.3137	24.5068	16.5506	0.0157099	0.999999	0.0123402	5.49762	2.48968	1.63517	1.10431	2.20816	FALSE	FALSE	FALSE
NM_001619.2	adrenergic, beta, receptor kinase 1 (ADRBK1)	GRK2	FALSE	FALSE	9.05147	49.7395	18.8977	14.7942	8.38212	0.299824	0.999999	0.0141931	5.49519	2.0878	1.63445	0.926051	2.63205	FALSE	FALSE	FALSE
BC028711.2	cancer/testis antigen CT45-3 (CT45-3)	CT45A3	FALSE	FALSE	10.2302	56.2089	26.9967	16.7184	11.9745	0.602563	0.999999	0.240268	5.49442	2.63893	1.63422	1.17051	2.08207	FALSE	FALSE	FALSE
BC000742.1	glutathione peroxidase 1 (GPX1)	GPX1	FALSE	FALSE	5.45402	29.9656	10.0649	8.91275	4.46433	0.257225	0.999999	0.0541309	5.49423	1.84541	1.63416	0.81854	2.97723	FALSE	FALSE	FALSE
BC014889.1	D4, zinc and double PHD fingers family 2 (DPF2)	DPF2	FALSE	FALSE	9.25905	50.8399	19.9921	15.1214	8.86757	0.238735	0.999999	0.064329	5.49083	2.1592	1.63315	0.957719	2.543	FALSE	FALSE	FALSE
Q5ZPR3	CD276 / B7-H3 Protein (His Tag)	CD276	FALSE	FALSE	1.72811	9.48782	3.09611	2.82199	1.37329	0.209197	0.999999	0.0144803	5.49028	1.79161	1.63299	0.794676	3.06444	FALSE	FALSE	FALSE
NM_181533.3	abhydrolase domain containing 12B (ABHD12B), transcript variant 2	ABHD12B	FALSE	FALSE	4.23399	23.2458	9.20918	6.91406	4.08477	0.188051	0.999999	0.00433504	5.49028	2.17506	1.63299	0.964754	2.5242	FALSE	FALSE	FALSE
BC020737.1	phosphatidylinositol glycan anchor biosynthesis, class K (PIGK)	PIGK	FALSE	FALSE	6.06562	33.3011	13.7691	9.90485	6.10735	0.0533125	0.999999	0.00858919	5.49015	2.27003	1.63295	1.00688	2.41853	FALSE	FALSE	FALSE
BC035970.1	cell death-inducing DFFA-like effector b (CIDEB)	CIDEB	FALSE	FALSE	3.79743	20.8447	7.84864	6.19988	3.48129	0.263323	0.999999	0.0158748	5.48915	2.06683	1.63265	0.91675	2.65583	FALSE	FALSE	FALSE
NM_002875.2	DNA repair protein RAD51 homolog 1	RAD51	FALSE	FALSE	4.35658	23.9	9.55375	7.10865	4.2376	0.121554	0.999999	0.0039128	5.48596	2.19295	1.6317	0.972689	2.50164	FALSE	FALSE	FALSE
NM_198489.1	coiled-coil domain containing 84 (CCDC84)	CCDC84	FALSE	FALSE	8.32949	45.6807	23.6383	13.5869	10.4849	0.133859	0.999999	0.0302802	5.48421	2.8379	1.63118	1.25876	1.93249	FALSE	FALSE	FALSE
NM_078476.1	butyrophilin, subfamily 2, member A1 (BTN2A1), transcript variant 2	BTN2A1	FALSE	FALSE	6.9818	38.2768	15.8446	11.3848	7.02795	0.126534	0.999999	0.0105772	5.48237	2.26942	1.63064	1.00661	2.41576	FALSE	FALSE	FALSE
BC014924.1	kinesin family member 2C (KIF2C)	KIF2C	FALSE	FALSE	19.9135	109.156	65.4631	32.4665	29.0364	0.0279292	0.654944	0.208054	5.4815	3.28737	1.63038	1.45813	1.66744	FALSE	FALSE	FALSE
NM_004073.2	polo-like kinase 3 (Drosophila) (PLK3)	PLK3	FALSE	FALSE	10.7801	59.0712	22.9395	17.5697	10.1749	0.0407792	0.999999	0.0113676	5.47964	2.12795	1.62982	0.943859	2.57508	FALSE	FALSE	FALSE
NM_199123.1	SET domain containing 3 (SETD3), transcript variant 2	SETD3	FALSE	FALSE	15.6567	85.7623	62.1224	25.5085	27.5546	0.443714	0.999999	0.257264	5.47767	3.96778	1.62924	1.75992	1.38054	FALSE	FALSE	FALSE
BC037957.1	Intermediate filament tail domain-containing protein 1	LMNTD1	FALSE	FALSE	5.16995	28.3109	11.162	8.42059	4.95092	0.0818762	0.999999	0.0162645	5.47606	2.15901	1.62876	0.957636	2.53638	FALSE	FALSE	FALSE
BC093762.1	PIN2-interacting protein 1, mRNA (cDNA clone MGC:120797 IMAGE:7939607), complete cds	PINX1	FALSE	FALSE	5.08343	27.8062	10.1114	8.27047	4.48495	0.162445	0.999999	0.00292357	5.46996	1.98909	1.62695	0.882269	2.74998	FALSE	FALSE	FALSE
BC063392.1	WD repeat domain 73 (WDR73)	WDR73	FALSE	FALSE	14.5936	79.8171	42.8088	23.7402	18.988	0.735449	0.999999	0.297814	5.46931	2.93339	1.62675	1.30111	1.8645	FALSE	FALSE	FALSE
BC010929.1	LIM domain binding 3 (LDB3)	LDB3	FALSE	FALSE	16.8989	92.379	45.3346	27.4765	20.1083	0.0939329	0.999999	0.00363656	5.46657	2.6827	1.62594	1.18992	2.03772	FALSE	FALSE	FALSE
NM_002003.2	Ficolin-1	FCN1	FALSE	FALSE	6.32961	34.5998	12.7467	10.2911	5.65386	0.304684	0.999999	0.0729485	5.46634	2.01383	1.62587	0.89324	2.7144	FALSE	FALSE	FALSE
NM_005147.1	DnaJ homolog subfamily A member 3, mitochondrial	DNAJA3	FALSE	FALSE	7.89743	43.1565	14.4951	12.8362	6.42936	0.15305	0.999999	0.0040346	5.46463	1.83542	1.62536	0.814107	2.97732	FALSE	FALSE	FALSE
NM_030906.2	serine/threonine kinase 33	STK33	FALSE	FALSE	16.9309	92.5174	59.1282	27.5177	26.2265	0.0378257	0.931628	0.0261171	5.46442	3.49233	1.6253	1.54904	1.56469	FALSE	FALSE	FALSE
XM_085236.6	PREDICTED: Homo sapiens hypothetical LOC145788 (LOC145788)	C15orf65	FALSE	FALSE	20.3006	110.912	57.6122	32.9888	25.5541	0.236991	0.999999	0.376854	5.46347	2.83795	1.62501	1.25878	1.92515	FALSE	FALSE	FALSE
BC011770.1	Similar to FAST kinase, clone MGC:19784 IMAGE:3831196, mRNA, complete cds	FASTK	FALSE	FALSE	8.75192	47.7922	22.025	14.215	9.76927	0.323646	0.999999	0.149916	5.46076	2.51659	1.62421	1.11624	2.16991	FALSE	FALSE	FALSE
NM_001004023.1	dual-specificity tyrosine-(Y)-phosphorylation regulated kinase 3 (DYRK3), transcript variant 2	DYRK3	FALSE	FALSE	12.1833	66.5299	36.8792	19.7882	16.3579	0.0493668	0.999999	0.00889682	5.46076	3.02704	1.62421	1.34265	1.804	FALSE	FALSE	FALSE
NM_004492.1	general transcription factor IIA, 2, 12kDa (GTF2A2)	GTF2A2	FALSE	FALSE	6.8577	37.4261	13.2857	11.1317	5.89291	0.101093	0.999999	0.000220409	5.45753	1.93734	1.62325	0.859312	2.81703	FALSE	FALSE	FALSE
NM_152318.1	chromosome 12 open reading frame 45 (C12orf45)	C12orf45	FALSE	FALSE	9.32848	50.9039	35.561	15.1405	15.7732	0.298063	0.999999	0.4533	5.45682	3.81209	1.62304	1.69087	1.43145	FALSE	FALSE	FALSE
NM_000764.2	cytochrome P450, family 2, subfamily A, polypeptide 7 (CYP2A7), transcript variant 1	CYP2A7	FALSE	FALSE	4.17353	22.774	7.17884	6.77373	3.1842	0.0650828	0.999999	0.00171555	5.45676	1.72009	1.62302	0.76295	3.17238	FALSE	FALSE	FALSE
NM_001786.2	cell division cycle 2, G1 to S and G2 to M (CDC2), transcript variant 1	CDK1	FALSE	FALSE	12.4442	67.8873	15.127	20.1919	6.70963	0.00996601	0.999999	0	5.45535	1.21559	1.6226	0.539179	4.48783	FALSE	FALSE	FALSE
NM_001696.2	ATPase, H+ transporting, lysosomal 31kDa, V1 subunit E1 (ATP6V1E1), transcript variant 1	ATP6V1E1	FALSE	FALSE	8.82165	48.1091	20.9487	14.3092	9.29187	0.158284	0.999999	0.0179818	5.45353	2.37469	1.62206	1.0533	2.29652	FALSE	FALSE	FALSE
BC020616.1	cytochrome P450, family 20, subfamily A, polypeptide 1 (CYP20A1)	CYP20A1	FALSE	FALSE	8.562	46.6865	18.0586	13.8861	8.00996	0.704049	0.999999	0.197576	5.45276	2.10916	1.62183	0.935525	2.58528	FALSE	FALSE	FALSE
NM_006755.1	transaldolase 1 (TALDO1)	TALDO1	FALSE	FALSE	2.59398	14.1418	3.8614	4.20625	1.71274	0.871858	0.999999	0.160352	5.4518	1.4886	1.62154	0.660275	3.66236	FALSE	FALSE	FALSE
NM_133430.1	G antigen, family D, 2 (GAGED2), transcript variant 3, mRNA	XAGE1E	FALSE	FALSE	9.05864	49.3849	19.9091	14.6887	8.83078	0.0390212	0.999999	0.00877302	5.45169	2.19781	1.62151	0.974846	2.48051	FALSE	FALSE	FALSE
BC001321.1	ankyrin repeat and SOCS box-containing 8 (ASB8)	ASB8	FALSE	FALSE	10.063	54.8581	25.7249	16.3166	11.4104	0.33871	0.999999	0.0847036	5.45148	2.55639	1.62145	1.1339	2.13249	FALSE	FALSE	FALSE
BC010056.2	melanoma antigen family F, 1 (MAGEF1)	MAGEF1	FALSE	FALSE	5.75069	31.3362	11.8498	9.3204	5.25601	0.111019	0.999999	0.00303802	5.44912	2.06058	1.62075	0.913979	2.64446	FALSE	FALSE	FALSE
NM_016816.1	2',5'-oligoadenylate synthetase 1, 40/46kDa (OAS1), transcript variant 1	OAS1	FALSE	FALSE	19.5486	106.514	43.1598	31.6809	19.1437	0.280621	0.999999	0.0293297	5.44869	2.20782	1.62062	0.979287	2.46791	FALSE	FALSE	FALSE
BC037168.2	WD repeat domain 48 (WDR48)	WDR48	FALSE	FALSE	6.44907	35.1376	13.5263	10.4511	5.99964	0.412152	0.999999	0.0122333	5.44847	2.0974	1.62055	0.93031	2.59773	FALSE	FALSE	FALSE
BC000201.1	WD repeat domain 1 (WDR1)	WDR1	FALSE	FALSE	9.24244	50.3568	18.7293	14.9778	8.30745	0.148302	0.999999	0.00578422	5.44844	2.02645	1.62054	0.898837	2.68867	FALSE	FALSE	FALSE
NM_152594.1	Sprouty-related, EVH1 domain containing 1 (SPRED1), mRNA	SPRED1	TRUE	FALSE	9.31161	50.7237	23.4225	15.0869	10.3891	0.270072	0.999999	0.0799664	5.44736	2.51541	1.62022	1.11572	2.1656	FALSE	FALSE	FALSE
NM_006640.2	septin 9 (SEPT9)	SEPT9	TRUE	FALSE	22.1074	120.412	56.1836	35.8144	24.9204	0.0740303	0.999999	0.00705284	5.44668	2.5414	1.62002	1.12725	2.14318	FALSE	FALSE	FALSE
NM_001006944.1	ribosomal protein S6 kinase, 90kDa, polypeptide 4 (RPS6KA4), transcript variant 2	RPS6KA4	FALSE	FALSE	13.8635	75.4924	28.9787	22.4539	12.8536	0.142108	0.999999	0.177795	5.44542	2.09029	1.61965	0.927157	2.6051	FALSE	FALSE	FALSE
NM_001018062.1	UPF0544 protein C5orf45 [Source:UniProtKB/Swiss-Prot;Acc:Q6NTE8]	C5orf45	FALSE	FALSE	5.77934	31.4601	13.8984	9.35727	6.1647	0.0289567	0.999999	0.00538087	5.44355	2.40485	1.61909	1.06668	2.26357	FALSE	FALSE	FALSE
NM_018376.2	nipsnap homolog 3B (C. elegans) (NIPSNAP3B)	NIPSNAP3B	FALSE	FALSE	4.06347	22.116	10.2837	6.57803	4.56136	0.0198176	0.999999	0.00552307	5.44265	2.53076	1.61882	1.12253	2.15059	FALSE	FALSE	FALSE
BC027911.1	jumonji domain containing 5 (JMJD5)	KDM8	FALSE	FALSE	7.7359	42.1009	20.2175	12.5222	8.96753	0.087628	0.999999	0.123362	5.44228	2.61346	1.61871	1.15921	2.08241	FALSE	FALSE	FALSE
NM_030577.1	transmembrane protein 177 (TMEM177), transcript variant 2	TMEM177	FALSE	FALSE	6.0433	32.88	12.828	9.7796	5.68989	0.0932575	0.999999	0.00139717	5.44074	2.12268	1.61825	0.941521	2.56315	FALSE	FALSE	FALSE
NM_002102.2	Glycophorin-E	GYPE	FALSE	FALSE	7.57415	41.199	12.7792	12.2539	5.66826	0.226594	0.999999	0.027651	5.43942	1.68721	1.61786	0.748369	3.22391	FALSE	FALSE	FALSE
NM_032140.1	chromosome 16 open reading frame 48 (C16orf48)	ENKD1	FALSE	FALSE	20.3089	110.453	52.0219	32.8524	23.0745	0.342883	0.999999	0.144693	5.43868	2.56154	1.61764	1.13618	2.12321	FALSE	FALSE	FALSE
BC012899.1	sialidase 4 (NEU4)	NEU4	FALSE	FALSE	1.52951	8.31143	2.7101	2.47209	1.20207	0.385287	0.999999	0.0343545	5.43406	1.77188	1.61627	0.785923	3.06684	FALSE	FALSE	FALSE
BC040966.1	sialic acid acetylesterase (SIAE)	SIAE	FALSE	TRUE	9.25657	50.2739	19.5872	14.9531	8.68799	0.0695196	0.999999	0.00264719	5.43116	2.11604	1.6154	0.938576	2.56666	FALSE	FALSE	FALSE
NM_181656.1	chromosome 17 open reading frame 58 (C17orf58), transcript variant 2	C17orf58	FALSE	FALSE	5.95906	32.3644	13.9787	9.62623	6.20031	0.311792	0.999999	0.114055	5.43113	2.34579	1.6154	1.04048	2.31526	FALSE	FALSE	FALSE
BC005043.1	hypothetical protein MGC31957 (MGC31957)	LOC254896	FALSE	FALSE	13.6235	73.9836	35.1806	22.0052	15.6045	0.309716	0.999999	0.0449787	5.43057	2.58234	1.61523	1.1454	2.10297	FALSE	FALSE	FALSE
NM_181294.1	CKLF-like MARVEL transmembrane domain-containing protein 1	CMTM1	FALSE	FALSE	10.0332	54.4394	28.9979	16.1921	12.8621	0.361471	0.999999	0.0293809	5.42592	2.89019	1.61384	1.28195	1.87736	FALSE	FALSE	FALSE
NM_080840.1	protein tyrosine phosphatase, receptor type, A (PTPRA), transcript variant 2	PTPRA	FALSE	FALSE	7.28219	39.4947	19.5012	11.747	8.64985	0.186567	0.999999	0.104543	5.42346	2.67793	1.61312	1.18781	2.02524	FALSE	FALSE	FALSE
NM_203283.1	Recombining binding protein suppressor of hairless (Drosophila) (RBPSUH), transcript variant 3, mRNA	RBPJ	FALSE	FALSE	15.4765	83.9084	41.4324	24.9571	18.3775	0.0273277	0.999999	0.0119576	5.42167	2.67712	1.61258	1.18745	2.02519	FALSE	FALSE	FALSE
NM_005012.1	Tyrosine-protein kinase transmembrane receptor ROR1	ROR1	FALSE	FALSE	16.3314	88.5057	6.80836	26.3245	3.01987	0.161163	0.999999	5.14003e-05	5.41937	0.416888	1.6119	0.184912	12.9996	FALSE	FALSE	FALSE
NM_000930.2	plasminogen activator, tissue (PLAT), transcript variant 1	PLAT	FALSE	FALSE	5.98369	32.4097	14.8445	9.63969	6.58431	0.15491	0.999999	0.0706254	5.41633	2.48082	1.611	1.10038	2.18328	FALSE	FALSE	FALSE
NM_000376.1	vitamin D (1,25- dihydroxyvitamin D3) receptor (VDR), transcript variant 1	VDR	FALSE	FALSE	7.61476	41.2403	25.7788	12.2662	11.4343	0.0948967	0.962354	0.264915	5.41583	3.38537	1.61084	1.50159	1.59977	FALSE	FALSE	FALSE
NM_175887.2	proline rich 15 (PRR15)	PRR15	FALSE	FALSE	8.58521	46.4655	22.2649	13.8204	9.87568	0.0489357	0.999999	0.033462	5.41227	2.5934	1.60979	1.15031	2.08694	FALSE	FALSE	FALSE
NM_014166.2	Mediator of RNA polymerase II transcription subunit 4	MED4	FALSE	FALSE	16.3586	88.5268	57.4036	26.3308	25.4616	0.448643	0.999999	0.432799	5.41163	3.50907	1.6096	1.55646	1.54218	FALSE	FALSE	FALSE
NM_031262.1	Heterogeneous nuclear ribonucleoprotein K (HNRPK), transcript variant 2, mRNA	HNRNPK	FALSE	FALSE	10.9198	58.9893	27.1492	17.5454	12.0421	0.0293268	0.999999	0.0455827	5.40203	2.48623	1.60674	1.10278	2.17278	FALSE	FALSE	FALSE
BC022379.1	solute carrier family 22 (organic anion/cation transporter), member 9 (SLC22A9)	SLC22A9	FALSE	FALSE	9.88428	53.3804	26.038	15.8771	11.5493	0.397793	0.999999	0.0945328	5.40053	2.63428	1.6063	1.16845	2.0501	FALSE	FALSE	FALSE
NM_022107.1	G-protein signaling modulator 3 (AGS3-like, C. elegans) (GPSM3)	GPSM3	FALSE	FALSE	28.4309	153.534	117.138	45.666	51.9568	0.124701	0.949882	0.34369	5.40025	4.12009	1.60621	1.82748	1.31071	FALSE	FALSE	FALSE
BC036092.1	MYC associated factor X (MAX)	MAX	FALSE	FALSE	4.3685	23.5902	8.79885	7.0165	3.90276	0.0225433	0.999999	0.00032916	5.40007	2.01416	1.60616	0.893387	2.68106	FALSE	FALSE	FALSE
NM_014312.3	V-set and immunoglobulin domain containing 2 (VSIG2), mRNA	VSIG2	FALSE	FALSE	13.3703	72.1967	36.0611	21.4737	15.995	0.233299	0.999999	0.042912	5.39977	2.6971	1.60607	1.19631	2.00207	FALSE	FALSE	FALSE
BC015562.1	AKT1 substrate 1 (proline-rich) (AKT1S1)	AKT1S1	FALSE	FALSE	29.2289	157.816	66.1847	46.9396	29.3564	0.105379	0.999999	0.0055965	5.3993	2.26435	1.60593	1.00436	2.38448	FALSE	FALSE	FALSE
NM_173518.2	chromosome 8 open reading frame 45 (C8orf45)	MCMDC2	FALSE	FALSE	4.19267	22.6362	8.96356	6.73275	3.97582	0.0615168	0.999999	0.00267773	5.399	2.13791	1.60584	0.94828	2.52536	FALSE	FALSE	FALSE
BC014519.1	Calcium-binding mitochondrial carrier protein SCaMC-1	SLC25A24	FALSE	FALSE	6.03768	32.5958	12.2111	9.69506	5.4163	0.231267	0.999999	0.00549786	5.39873	2.02249	1.60576	0.897082	2.66935	FALSE	FALSE	FALSE
BC028301.1	chromosome 18 open reading frame 56 (C18orf56)	TYMSOS	FALSE	FALSE	6.69248	36.1192	15.6957	10.743	6.96187	0.84165	0.999999	0.0997851	5.39699	2.34527	1.60524	1.04025	2.30122	FALSE	FALSE	FALSE
NM_015004.2	exosome component 7 (EXOSC7)	EXOSC7	FALSE	FALSE	11.3444	61.2213	43.6256	18.2092	19.3503	0.0898836	0.612005	0.515867	5.39662	3.84556	1.60513	1.70571	1.40334	FALSE	FALSE	FALSE
NM_003212.1	Teratocarcinoma-derived growth factor 1 (TDGF1), mRNA	TDGF1	FALSE	FALSE	16.8206	90.7297	23.654	26.986	10.4918	0.102959	0.999999	0.000220409	5.39396	1.40625	1.60434	0.623749	3.83569	FALSE	FALSE	FALSE
NM_145021.1	membrane-associated ring finger (C3HC4) 8 (MARCH8), transcript variant 8	MARCH8	FALSE	FALSE	20.3564	109.8	65.2756	32.658	28.9533	0.0420733	0.990817	0.0977583	5.39385	3.20663	1.60431	1.42231	1.68209	FALSE	FALSE	FALSE
XM_211447.4	PREDICTED: Homo sapiens hypothetical LOC284409 (LOC284409)	KDM4B	FALSE	FALSE	3.70157	19.9618	17.1627	5.93728	7.6126	0.770928	0.999999	0.505057	5.39279	4.63662	1.60399	2.05659	1.16309	FALSE	FALSE	FALSE
NM_006815.2	transmembrane emp24 domain trafficking protein 2 (TMED2)	TMED2	FALSE	FALSE	8.90092	47.9818	16.6528	14.2714	7.38643	0.0404508	0.999999	0.00273548	5.39066	1.87091	1.60336	0.82985	2.8813	FALSE	FALSE	FALSE
BC053901.1	zinc finger protein 280A (SUHW1)	ZNF280A	FALSE	FALSE	11.5735	62.3881	31.9218	18.5563	14.159	0.871858	0.999999	0.225175	5.39062	2.75819	1.60335	1.22341	1.9544	FALSE	FALSE	FALSE
NM_145315.2	lactation elevated 1 (LACE1)	LACE1	FALSE	FALSE	12.7262	68.6001	35.2239	20.4039	15.6237	0.572413	0.999999	0.450168	5.39047	2.76783	1.6033	1.22768	1.94754	FALSE	FALSE	FALSE
NM_001007067.1	syndecan binding protein (syntenin) (SDCBP), transcript variant 2	SDCBP	FALSE	FALSE	6.50006	35.0314	16.6271	10.4195	7.375	0.067525	0.999999	0.00271424	5.3894	2.55799	1.60298	1.13461	2.10689	FALSE	FALSE	FALSE
BC027729.1	tetra-peptide repeat homeobox-like (TPRXL)	TPRXL	FALSE	FALSE	8.68492	46.8047	23.5609	13.9213	10.4505	0.866693	0.999999	0.121509	5.3892	2.71285	1.60292	1.20329	1.98654	FALSE	FALSE	FALSE
NM_030815.1	p53 and DNA damage regulated 1 (PDRG1)	PDRG1	FALSE	FALSE	14.8184	79.7542	32.2692	23.7215	14.3131	0.480334	0.999999	0.152379	5.38212	2.17765	1.60082	0.965904	2.47153	FALSE	FALSE	FALSE
NM_145020.1	coiled-coil domain containing 11 (CCDC11)	CFAP53	FALSE	FALSE	6.36724	34.2662	14.4545	10.1919	6.41135	0.3976	0.999999	0.0257808	5.38165	2.27014	1.60068	1.00693	2.37063	FALSE	FALSE	FALSE
NM_022135.2	popeye domain containing 2 (POPDC2)	POPDC2	FALSE	FALSE	19.1342	102.961	104.329	30.624	46.2755	0.242667	0.911642	0.490108	5.38098	5.45247	1.60048	2.41846	0.986888	FALSE	FALSE	FALSE
NM_017609.2	chromosome 10 open reading frame 92 (C10orf92)	CFAP46	FALSE	FALSE	7.36251	39.6075	16.0332	11.7806	7.1116	0.0557339	0.999999	0.00032916	5.37962	2.17769	1.60007	0.965921	2.47034	FALSE	FALSE	FALSE
NM_152776.1	hypothetical protein MGC40579 (MGC40579)	GK5	FALSE	FALSE	7.65276	41.1586	15.0608	12.2419	6.68029	0.0740303	0.999999	0.00951206	5.37826	1.96803	1.59967	0.872926	2.73282	FALSE	FALSE	FALSE
NM_203370.1	chromosome 3 open reading frame 54 (C3orf54)	FAM212A	FALSE	FALSE	14.2498	76.6358	80.3193	22.794	35.6259	0.800808	0.778633	0.402993	5.37804	5.63653	1.5996	2.50011	0.954139	FALSE	FALSE	FALSE
Q02297	NRG1 (aa 20-241) Protein (His Tag)	NRG1	FALSE	FALSE	1.19878	6.4453	3.36966	1.91704	1.49463	0.357	0.999999	0.0476241	5.37653	2.8109	1.59916	1.24679	1.91274	FALSE	FALSE	FALSE
XM_499573.1	PREDICTED: Homo sapiens hypothetical gene supported by NM_153241 (LOC442774)	LOC439933	FALSE	FALSE	8.98805	48.2904	12.1807	14.3631	5.40281	0.458434	0.999999	0.248478	5.37274	1.35521	1.59803	0.60111	3.96449	FALSE	FALSE	FALSE
NM_006754.2	synaptophysin-like 1 (SYPL1), transcript variant 1	SYPL1	FALSE	FALSE	7.92909	42.5944	21.3251	12.669	9.45881	0.660511	0.999999	0.411031	5.37192	2.68947	1.59778	1.19293	1.99739	FALSE	FALSE	FALSE
NM_012265.1	rhomboid domain containing 3 (RHBDD3)	RHBDD3	FALSE	FALSE	6.69899	35.9829	5.54657	10.7025	2.4602	0.228676	0.999999	0.00505801	5.37139	0.82797	1.59763	0.367249	6.48743	FALSE	FALSE	FALSE
NM_176792.1	mitochondrial ribosomal protein L43 (MRPL43), nuclear gene encoding mitochondrial protein, transcript variant 2	MRPL43	FALSE	FALSE	9.72876	52.2556	33.1605	15.5425	14.7085	0.689232	0.999999	0.163661	5.37125	3.4085	1.59759	1.51185	1.57584	FALSE	FALSE	FALSE
NM_001006666.1	apolipoprotein B mRNA editing enzyme, catalytic polypeptide-like 3F (APOBEC3F), transcript variant 2, mRNA.	APOBEC3F	FALSE	FALSE	5.57568	29.9465	12.4705	8.90708	5.53134	0.055988	0.999999	0.000826508	5.37092	2.23659	1.59749	0.992048	2.40139	FALSE	FALSE	FALSE
NM_006466.1	polymerase (RNA) III (DNA directed) polypeptide F, 39 kDa (POLR3F)	POLR3F	FALSE	FALSE	8.32155	44.6781	25.4638	13.2887	11.2945	0.107931	0.999999	0.0335194	5.36896	3.05998	1.5969	1.35726	1.75457	FALSE	FALSE	FALSE
NM_022650.1	RAS p21 protein activator (GTPase activating protein) 1 (RASA1), transcript variant 2	RASA1	FALSE	FALSE	8.84801	47.5036	23.9241	14.1291	10.6116	0.0278289	0.889007	0.0734741	5.36884	2.70389	1.59687	1.19932	1.9856	FALSE	FALSE	FALSE
BC008392.1	uncoupling protein 3 (mitochondrial, proton carrier) (UCP3)	UCP3	FALSE	FALSE	6.75767	36.2733	11.8718	10.7889	5.2658	0.350889	0.999999	0.00401349	5.36773	1.75679	1.59654	0.779233	3.05541	FALSE	FALSE	FALSE
BC039014.1	RNA polymerase II associated protein 2 (RPAP2)	RPAP2	FALSE	FALSE	7.47614	40.1284	17.6	11.9355	7.80652	0.401612	0.999999	0.0166053	5.36752	2.35415	1.59648	1.04419	2.28003	FALSE	FALSE	FALSE
NM_001008723.1	chromosome 10 open reading frame 80 (C10orf80)	CFAP58	FALSE	FALSE	6.87525	36.877	15.2881	10.9684	6.78109	0.0350188	0.999999	0.0227509	5.36373	2.22364	1.59535	0.986304	2.41214	FALSE	FALSE	FALSE
Q13449	LSAMP Protein (His Tag)	LSAMP	FALSE	TRUE	1.5903	8.52864	3.34832	2.5367	1.48516	0.166906	0.999999	0.00156762	5.36291	2.10546	1.5951	0.933885	2.54714	FALSE	FALSE	FALSE
BC017589.2	tumor protein D52-like 3 (TPD52L3)	TPD52L3	FALSE	FALSE	12.8585	68.9321	28.5354	20.5027	12.657	0.304932	0.999999	0.0219428	5.36083	2.21919	1.59449	0.98433	2.41567	FALSE	FALSE	FALSE
NM_032312.2	Yip1 domain family, member 4 (YIPF4)	YIPF4	FALSE	FALSE	4.10823	22.0226	7.29962	6.55023	3.23777	0.0271403	0.999999	5.14003e-05	5.3606	1.77683	1.59442	0.788119	3.01695	FALSE	FALSE	FALSE
BC004205.2	Sprouty homolog 2 (Drosophila), mRNA (cDNA clone MGC:4026 IMAGE:3533337), complete cds	SPRY2	TRUE	FALSE	12.0166	64.4077	25.9906	19.157	11.5282	0.0317066	0.999999	0.00169308	5.3599	2.16289	1.59421	0.959358	2.47812	FALSE	FALSE	FALSE
NM_004143.2	Cbp/p300-interacting transactivator 1	CITED1	FALSE	FALSE	32.9658	176.526	151.624	52.5047	67.2533	0.0513225	0.537791	0.419826	5.35482	4.59942	1.5927	2.04009	1.16424	FALSE	FALSE	FALSE
NM_133375.2	DIS3-like exonuclease 1	DIS3L	FALSE	FALSE	8.92228	47.7675	23.4689	14.2076	10.4097	0.0520205	0.999999	0.0151229	5.35373	2.63037	1.59238	1.16671	2.03535	FALSE	FALSE	FALSE
NM_032174.2	translocase of outer mitochondrial membrane 40 homolog (yeast)-like (TOMM40L)	TOMM40L	FALSE	FALSE	3.37415	18.0636	5.60712	5.37271	2.48706	0.161812	0.999999	0.000252772	5.35354	1.66179	1.59232	0.737093	3.22155	FALSE	FALSE	FALSE
NM_004111.4	flap structure-specific endonuclease 1 (FEN1)	FEN1	FALSE	FALSE	16.2921	87.2114	41.3699	25.9395	18.3498	0.177233	0.999999	0.0680722	5.35299	2.53926	1.59215	1.1263	2.10809	FALSE	FALSE	FALSE
NM_153208.1	IQ motif containing K (IQCK)	IQCK	FALSE	FALSE	10.2805	55.025	29.8242	16.3662	13.2286	0.105278	0.999999	0.10818	5.35237	2.90105	1.59197	1.28677	1.84498	FALSE	FALSE	FALSE
NM_145756.1	Zinc finger protein 396 (ZNF396), mRNA	ZNF396	FALSE	FALSE	9.53594	51.0355	19.4186	15.1796	8.61318	0.0835753	0.999999	0.00730962	5.35191	2.03636	1.59183	0.903233	2.62818	FALSE	FALSE	FALSE
NM_172014.1	tumor necrosis factor (ligand) superfamily, member 14 (TNFSF14), transcript variant 2	TNFSF14	FALSE	FALSE	11.9687	64.0321	32.2738	19.0452	14.3152	0.0189359	0.966519	0.086436	5.34997	2.69652	1.59126	1.19605	1.98403	FALSE	FALSE	FALSE
NM_022562.2	Growth hormone 1 (GH1), transcript variant 5, mRNA	GH1	FALSE	FALSE	8.4717	45.3201	26.6308	13.4797	11.8122	0.26656	0.999999	0.146403	5.34958	3.1435	1.59114	1.39431	1.70179	FALSE	FALSE	FALSE
NM_005622.3	acyl-CoA synthetase medium-chain family member 3 (ACSM3), transcript variant 1	ACSM3	FALSE	FALSE	12.1987	65.254	31.9471	19.4087	14.1703	0.262796	0.999999	0.119649	5.34925	2.61889	1.59104	1.16162	2.04256	FALSE	FALSE	FALSE
NM_003104.2	sorbitol dehydrogenase (SORD)	SORD	FALSE	FALSE	10.0324	53.6541	29.328	15.9585	13.0085	0.500681	0.999999	0.393001	5.3481	2.92334	1.5907	1.29666	1.82945	FALSE	FALSE	FALSE
NM_005142.2	gastric intrinsic factor (vitamin B synthesis) (GIF)	GIF	FALSE	FALSE	5.12351	27.3883	12.8453	8.14618	5.6976	0.0518753	0.999999	0.00456598	5.34562	2.50714	1.58996	1.11205	2.13216	FALSE	FALSE	FALSE
NM_198098.1	Aquaporin-1	AQP1	TRUE	FALSE	4.87614	26.0564	19.0109	7.75003	8.43234	0.0312823	0.911642	0.201066	5.34366	3.89875	1.58938	1.72931	1.37061	FALSE	FALSE	FALSE
BC011526.1	PCTAIRE protein kinase 3 (PCTK3)	CDK18	FALSE	FALSE	4.75667	25.4122	7.26361	7.55841	3.2218	0.135511	0.999999	0.00177799	5.34243	1.52704	1.58901	0.677323	3.49856	FALSE	FALSE	FALSE
NM_147204.1	transient receptor potential cation channel, subfamily V, member 4 (TRPV4), transcript variant 2	TRPV4	FALSE	FALSE	4.82814	25.7763	8.70088	7.66671	3.85931	0.37224	0.999999	0.0139882	5.33876	1.80212	1.58792	0.799336	2.96249	FALSE	FALSE	FALSE
BC024269.1	major histocompatibility complex, class II, DR beta 1 (HLA-DRB1)	HLA-DRB1	FALSE	FALSE	12.4863	66.6604	26.4115	19.827	11.7149	0.186715	0.999999	0.0111921	5.33868	2.11523	1.5879	0.93822	2.52392	FALSE	FALSE	FALSE
NM_006912.3	Ras-like without CAAX 1 (RIT1)	RIT1	FALSE	FALSE	9.25996	49.4231	27.9347	14.7	12.3905	0.543226	0.999999	0.491814	5.33729	3.01672	1.58748	1.33808	1.76924	FALSE	FALSE	FALSE
NM_014943.3	zinc fingers and homeoboxes 2 (ZHX2)	ZHX2	FALSE	TRUE	18.0897	96.4923	62.0306	28.7	27.5139	0.43535	0.999999	0.408453	5.3341	3.42905	1.58654	1.52097	1.55556	FALSE	FALSE	FALSE
NM_015638.2	Trpc4-associated protein	TRPC4AP	FALSE	FALSE	5.56408	29.6752	11.4907	8.82638	5.09674	0.118293	0.999999	0.00032916	5.33336	2.06516	1.58632	0.916009	2.58254	FALSE	FALSE	FALSE
BC000877.1	arginine vasopressin-induced 1 (AVPI1)	AVPI1	FALSE	FALSE	7.68566	40.9904	18.4985	12.1919	8.20508	0.08057	0.999999	0.0407989	5.33336	2.40688	1.58631	1.06758	2.21588	FALSE	FALSE	FALSE
NM_004629.1	Fanconi anemia, complementation group G (FANCG)	FANCG	FALSE	FALSE	6.07544	32.4013	11.2833	9.6372	5.00475	0.214559	0.999999	0.00503501	5.33316	1.8572	1.58626	0.823768	2.87161	FALSE	FALSE	FALSE
NM_014826.1	CDC42 binding protein kinase alpha (DMPK-like)	CDC42BPA	TRUE	TRUE	10.0206	53.4145	30.2294	15.8872	13.4084	0.16327	0.999999	0.293341	5.33046	3.01672	1.58545	1.33808	1.76697	FALSE	FALSE	FALSE
NM_001070.1	tubulin, gamma 1 (TUBG1)	TUBG1	FALSE	FALSE	10.8041	57.5729	34.1235	17.1241	15.1356	0.546195	0.999999	0.0845413	5.32879	3.15838	1.58496	1.40091	1.68719	FALSE	FALSE	FALSE
BC062696.1	microsomal triglyceride transfer protein (MTTP)	MTTP	FALSE	FALSE	4.66282	24.839	8.56075	7.38794	3.79715	0.360858	0.999999	0.0146783	5.32705	1.83596	1.58444	0.814348	2.9015	FALSE	FALSE	FALSE
NM_001004708.1	olfactory receptor, family 4, subfamily D, member 6 (OR4D6)	OR4D6	FALSE	FALSE	8.49228	45.1614	17.388	13.4325	7.71253	0.0242357	0.999999	0.00205643	5.31794	2.04751	1.58173	0.908181	2.59727	FALSE	FALSE	FALSE
BC000594.2	lysyl oxidase-like 2 (LOXL2)	LOXL2	FALSE	FALSE	9.47844	50.3705	24.7031	14.9818	10.9571	0.0955147	0.999999	0.015329	5.31422	2.60624	1.58062	1.15601	2.03904	FALSE	FALSE	FALSE
NM_199190.1	La ribonucleoprotein domain family, member 4 (LARP4), transcript variant 3	LARP4	FALSE	FALSE	40.9149	217.347	140.128	64.6462	62.1544	0.0734431	0.999999	0.0734741	5.31219	3.42487	1.58002	1.51912	1.55106	FALSE	FALSE	FALSE
BC016754.1	karyopherin alpha 4 (importin alpha 3) (KPNA4)	KPNA4	FALSE	FALSE	5.32495	28.2855	10.6447	8.41303	4.72151	0.10647	0.999999	0.00209199	5.31188	1.99903	1.57993	0.886677	2.65723	FALSE	FALSE	FALSE
NM_001033.2	Ribonucleoside-diphosphate reductase large subunit	RRM1	FALSE	FALSE	4.38303	23.2794	12.3977	6.92405	5.49906	0.271397	0.999999	0.130218	5.31125	2.82857	1.57974	1.25462	1.87771	FALSE	FALSE	FALSE
NM_000572.2	Interleukin-10	IL10	FALSE	FALSE	7.47997	39.7228	15.5354	11.8149	6.89079	0.325324	0.999999	0.00632104	5.31056	2.07694	1.57953	0.921232	2.55692	FALSE	FALSE	FALSE
BC004219.1	1-acylglycerol-3-phosphate O-acyltransferase 3 (AGPAT3)	AGPAT3	FALSE	FALSE	10.182	54.0641	31.5668	16.0804	14.0016	0.219519	0.999999	0.318478	5.30976	3.10024	1.5793	1.37512	1.71269	FALSE	FALSE	FALSE
NP_002505.1	NOV / CCN3 Protein (His Tag)	NOV	FALSE	FALSE	1.60592	8.52688	3.78591	2.53617	1.67925	0.272229	0.999999	0.117157	5.30964	2.35746	1.57926	1.04566	2.25227	FALSE	FALSE	FALSE
BC010033.1	quinolinate phosphoribosyltransferase (nicotinate-nucleotide pyrophosphorylase (carboxylating)) (QPRT)	QPRT	FALSE	FALSE	9.12863	48.4661	23.2453	14.4154	10.3105	0.379691	0.999999	0.363018	5.30925	2.54642	1.57914	1.12947	2.08499	FALSE	FALSE	FALSE
NM_014314.3	Probable ATP-dependent RNA helicase DDX58	DDX58	FALSE	FALSE	10.4013	55.2033	40.2673	16.4193	17.8607	0.812502	0.999999	0.586217	5.30732	3.87135	1.57857	1.71715	1.37092	FALSE	FALSE	FALSE
NM_002233.1	Potassium voltage-gated channel, shaker-related subfamily, member 4 (KCNA4), mRNA	KCNA4	FALSE	FALSE	8.19217	43.4778	26.8818	12.9317	11.9235	0.186726	0.999999	0.0956742	5.30724	3.28141	1.57855	1.45548	1.61737	FALSE	FALSE	FALSE
ENST00000397586	Chromodomain protein, Y-like (CDYL), transcript variant 3, mRNA	CDYL	FALSE	FALSE	8.69594	46.1481	26.5445	13.726	11.7739	0.190767	0.999999	0.0274255	5.30685	3.05251	1.57843	1.35395	1.73852	FALSE	FALSE	FALSE
NM_003338.2	ubiquitin-conjugating enzyme E2D 1 (UBC4/5 homolog, yeast) (UBE2D1)	UBE2D1	FALSE	FALSE	9.56018	50.7087	23.0932	15.0824	10.2431	0.495424	0.999999	0.251391	5.30416	2.41557	1.57763	1.07143	2.19582	FALSE	FALSE	FALSE
NM_001319.5	casein kinase 1, gamma 2 (CSNK1G2)	CSNK1G2	FALSE	FALSE	12.2004	64.6959	25.1287	19.2427	11.1459	0.043701	0.999999	0.00235517	5.30275	2.05965	1.57721	0.913566	2.57459	FALSE	FALSE	FALSE
NM_000284.1	pyruvate dehydrogenase (lipoamide) alpha 1 (PDHA1)	PDHA1	FALSE	FALSE	24.6488	130.705	67.1725	38.876	29.7946	0.361921	0.999999	0.106631	5.30269	2.72518	1.57719	1.20876	1.94581	FALSE	FALSE	FALSE
NM_002983.1	chemokine (C-C motif) ligand 3 (CCL3)	CCL3	FALSE	FALSE	8.19507	43.4439	12.3447	12.9216	5.47555	0.217761	0.999999	0.00442311	5.30122	1.50636	1.57676	0.668152	3.51922	FALSE	FALSE	FALSE
BC006354.1	Coenzyme A synthase (COASY)	COASY	FALSE	FALSE	7.78582	41.2724	21.3886	12.2758	9.48699	0.463497	0.999999	0.281145	5.30097	2.74712	1.57668	1.2185	1.92965	FALSE	FALSE	FALSE
NM_031457.1	Membrane-spanning 4-domains subfamily A member 8B	MS4A8	FALSE	FALSE	8.95455	47.4659	19.5679	14.1179	8.6794	0.0952855	0.999999	0.0141509	5.30076	2.18524	1.57662	0.969273	2.42571	FALSE	FALSE	FALSE
NM_145202.3	proline-rich acidic protein 1 (PRAP1)	PRAP1	FALSE	FALSE	12.5109	66.3146	44.2563	19.7241	19.63	0.17746	0.999999	0.194851	5.30055	3.53742	1.57656	1.56904	1.49842	FALSE	FALSE	FALSE
NM_002346.1	lymphocyte antigen 6 complex, locus E (LY6E)	LY6E	FALSE	FALSE	9.82021	52.0427	22.5906	15.4792	10.0201	0.186663	0.999999	0.148236	5.29955	2.30041	1.57626	1.02036	2.30374	FALSE	FALSE	FALSE
BC053595.1	chromosome 22 open reading frame 9 (C22orf9)	KIAA0930	FALSE	FALSE	17.2049	91.1776	50.7632	27.1192	22.5162	0.871858	0.999999	0.360569	5.29952	2.95051	1.57625	1.30871	1.79614	FALSE	FALSE	FALSE
NM_173042.1	interleukin 18 binding protein (IL18BP), transcript variant A	IL18BP	FALSE	FALSE	7.71815	40.8968	18.9976	12.164	8.42648	0.181331	0.999999	0.0244965	5.29878	2.46142	1.57603	1.09177	2.15273	FALSE	FALSE	FALSE
NP_001203.1	HABP1 / C1QBP / GC1QBP Protein (His Tag)	C1QBP	FALSE	FALSE	23.2112	122.947	78.0441	36.5685	34.6167	0.120921	0.999999	0.0987832	5.2969	3.36235	1.57547	1.49138	1.57536	FALSE	FALSE	FALSE
BC008042.2	Tumor necrosis factor ligand superfamily member 13	TNFSF13	FALSE	FALSE	10.068	53.3282	24.5073	15.8616	10.8703	0.121385	0.999999	0.0388837	5.29683	2.43419	1.57545	1.07969	2.17601	FALSE	FALSE	FALSE
BC017871.1	ribonuclease P/MRP 40kDa subunit (RPP40)	RPP40	FALSE	FALSE	13.294	70.3958	31.7255	20.938	14.072	0.163223	0.999999	0.0126569	5.29532	2.38646	1.575	1.05852	2.2189	FALSE	FALSE	FALSE
NM_006319.2	CDP-diacylglycerol--inositol 3-phosphatidyltransferase (phosphatidylinositol synthase) (CDIPT)	CDIPT	FALSE	FALSE	15.7386	83.3408	46.6592	24.7883	20.6959	0.411555	0.999999	0.289845	5.29529	2.96463	1.57499	1.31497	1.78616	FALSE	FALSE	FALSE
BC007414.2	UBX domain-containing protein 6	UBXN6	FALSE	FALSE	12.0748	63.9277	26.4045	19.0142	11.7118	0.340119	0.999999	0.0597473	5.29429	2.18674	1.5747	0.969937	2.42109	FALSE	FALSE	FALSE
NM_001767.2	CD2 molecule (CD2)	CD2	FALSE	FALSE	5.89917	31.2291	11.9619	9.28854	5.30573	0.0125189	0.999999	0.00208077	5.2938	2.02772	1.57455	0.899403	2.61072	FALSE	FALSE	FALSE
NM_001861.2	Cytochrome c oxidase subunit IV isoform 1 (COX4I1), mRNA	COX4I1	FALSE	FALSE	3.47058	18.3653	6.47297	5.46244	2.87111	0.710212	0.999999	0.0651276	5.2917	1.8651	1.57393	0.82727	2.83723	FALSE	FALSE	FALSE
BC008406.1	CD36 molecule (thrombospondin receptor) (CD36)	CD36	FALSE	FALSE	3.92188	20.7532	6.88823	6.17268	3.0553	0.303811	0.999999	0.00470108	5.29165	1.75636	1.57391	0.779039	3.01285	FALSE	FALSE	FALSE
BC015842.1	eukaryotic translation initiation factor 4A, isoform 2 (EIF4A2)	EIF4A2	FALSE	FALSE	10.4408	55.2468	24.0941	16.4322	10.687	0.135511	0.999999	0.0384764	5.29145	2.3077	1.57385	1.02359	2.29296	FALSE	FALSE	FALSE
NM_014370.1	SFRS protein kinase 3 (SRPK3)	SRPK3	FALSE	FALSE	6.84656	36.2146	12.9922	10.7714	5.76273	0.269549	0.999999	0.0429828	5.28946	1.89762	1.57326	0.841697	2.78742	FALSE	FALSE	FALSE
BC008250.1	ethylmalonic encephalopathy 1 (ETHE1)	ETHE1	FALSE	FALSE	10.0538	53.1754	26.2375	15.8161	11.6378	0.265987	0.999999	0.204168	5.28908	2.60972	1.57315	1.15755	2.02669	FALSE	FALSE	FALSE
NM_024508.3	zinc finger, BED-type containing 2 (ZBED2)	ZBED2	FALSE	FALSE	3.79919	20.0921	6.46747	5.97606	2.86867	0.19623	0.999999	0.00253483	5.28853	1.70233	1.57298	0.755074	3.10664	FALSE	FALSE	FALSE
BC059361.1	ADP-ribosylation factor-like 10 (ARL10)	ARL10	FALSE	FALSE	8.73178	46.1268	7.49584	13.7196	3.32481	0.265397	0.999999	0.0149464	5.28264	0.858455	1.57123	0.380771	6.15365	FALSE	FALSE	FALSE
BC068518.1	BTB/POZ domain-containing protein KCTD9	KCTD9	FALSE	FALSE	6.80107	35.8941	11.6907	10.6761	5.18547	0.240634	0.999999	0.00505801	5.27771	1.71895	1.56976	0.762449	3.0703	FALSE	FALSE	FALSE
BC006192.1	Forkhead box M1, clone MGC:10704 IMAGE:3833837, mRNA, complete cds	FOXM1	FALSE	FALSE	21.5194	113.545	72.4367	33.772	32.1296	0.0319174	0.850792	0.0909977	5.2764	3.36611	1.56937	1.49305	1.56751	FALSE	FALSE	FALSE
BC059947.1	chondrosarcoma associated gene 1 (CSAG1)	CSAG1	FALSE	FALSE	13.5279	71.3639	41.8715	21.226	18.5723	0.232267	0.999999	0.129404	5.27533	3.0952	1.56905	1.37289	1.70436	FALSE	FALSE	FALSE
NM_005621.1	S100 calcium binding protein A12 (S100A12)	S100A12	FALSE	FALSE	7.07261	37.3045	12.5138	11.0956	5.55053	0.207972	0.999999	0.0452527	5.2745	1.76933	1.56881	0.784793	2.98107	FALSE	FALSE	FALSE
NM_016371.1	3-keto-steroid reductase	HSD17B7	FALSE	FALSE	15.7168	82.8697	45.3921	24.6482	20.1338	0.430851	0.999999	0.130201	5.27267	2.88812	1.56827	1.28104	1.82564	FALSE	FALSE	FALSE
BC009785.1	glycine-N-acyltransferase (GLYAT)	GLYAT	FALSE	FALSE	5.98972	31.5818	12.9866	9.39347	5.76028	0.0832791	0.999999	0.00643405	5.27267	2.16816	1.56826	0.961694	2.43187	FALSE	FALSE	FALSE
NM_001003683.1	phosphodiesterase 1A, calmodulin-dependent (PDE1A), transcript variant 2, mRNA.	PDE1A	FALSE	FALSE	9.91902	52.2991	22.0189	15.5555	9.76657	0.246396	0.999999	0.0279655	5.2726	2.21987	1.56824	0.984631	2.37519	FALSE	FALSE	FALSE
BC060773.1	SRY (sex determining region Y)-box 5 (SOX5)	SOX5	FALSE	FALSE	11.1119	58.5699	33.3575	17.4206	14.7958	0.102512	0.999999	0.111064	5.27094	3.00197	1.56775	1.33154	1.75583	FALSE	FALSE	FALSE
NM_019101.2	apolipoprotein M (APOM)	APOM	FALSE	FALSE	11.2322	59.1941	37.0323	17.6063	16.4258	0.278732	0.999999	0.484607	5.27006	3.29699	1.56749	1.46239	1.59845	FALSE	FALSE	FALSE
NM_199415.1	U-box domain containing 5 (UBOX5), transcript variant 2	UBOX5	FALSE	FALSE	15.885	83.6795	62.753	24.889	27.8343	0.126917	0.921264	0.36925	5.26782	3.95045	1.56682	1.75224	1.33347	FALSE	FALSE	FALSE
BC005911.1	sterol carrier protein 2 (SCP2)	SCP2	FALSE	FALSE	14.3604	75.6281	47.6586	22.4943	21.1391	0.0985508	0.999999	0.0708749	5.26645	3.31876	1.56641	1.47205	1.58687	FALSE	FALSE	FALSE
BC035123.1	Transmembrane protease, serine 12, mRNA (cDNA clone MGC:43213 IMAGE:5263466), complete cds	TMPRSS12	FALSE	FALSE	4.62955	24.3761	8.61876	7.25025	3.82288	0.150385	0.999999	0.00150426	5.26533	1.86168	1.56608	0.825757	2.82826	FALSE	FALSE	FALSE
NM_175733.2	synaptotagmin IX (SYT9)	SYT9	FALSE	FALSE	4.46586	23.5136	10.4662	6.99371	4.64232	0.222877	0.999999	0.021159	5.26518	2.3436	1.56604	1.03951	2.24662	FALSE	FALSE	FALSE
NM_004302.3	activin A receptor, type IB (ACVR1B), transcript variant 1	ACVR1B	FALSE	FALSE	8.97482	47.2539	19.1325	14.0549	8.48631	0.141441	0.999999	0.0174658	5.26517	2.1318	1.56603	0.945568	2.46982	FALSE	FALSE	FALSE
XM_378175.2	PREDICTED: Homo sapiens hypothetical protein BC017488 (LOC124446)	TMEM219	FALSE	FALSE	6.24434	32.8648	20.5361	9.77506	9.10886	0.684949	0.999999	0.240539	5.26313	3.28876	1.56543	1.45874	1.60034	FALSE	FALSE	FALSE
BC104468.1	Outer dense fiber protein 3-like protein 2	ODF3L2	FALSE	FALSE	9.92066	52.2133	20.3691	15.53	9.0348	0.304467	0.999999	0.00730962	5.26309	2.0532	1.56542	0.910705	2.56336	FALSE	FALSE	FALSE
NM_004566.1	6-phosphofructo-2-kinase/fructose-2,6-biphosphatase 3 (PFKFB3)	PFKFB3	FALSE	FALSE	24.5396	129.152	96.9761	38.4141	43.0141	0.0541851	0.609363	0.353831	5.26301	3.95182	1.56539	1.75285	1.33179	FALSE	FALSE	FALSE
BC000797.1	chromosome 2 open reading frame 33 (C2orf33)	MFF	FALSE	FALSE	7.28311	38.315	13.4429	11.3961	5.96264	0.0147639	0.999999	0.000826508	5.26081	1.84576	1.56474	0.818695	2.85021	FALSE	FALSE	FALSE
BC013161.1	receptor (chemosensory) transporter protein 4 (RTP4)	RTP4	FALSE	FALSE	5.23464	27.5361	9.28618	8.19013	4.11892	0.136793	0.999999	0.007255	5.26036	1.77399	1.5646	0.786858	2.96528	FALSE	FALSE	FALSE
BC032698.1	ephrin-A1 (EFNA1)	EFNA1	FALSE	FALSE	9.92937	52.2103	22.2873	15.5291	9.8856	0.834954	0.999999	0.151748	5.25817	2.24458	1.56395	0.995592	2.34261	FALSE	FALSE	FALSE
BC008803.1	eyes absent homolog 2 (Drosophila) (EYA2)	EYA2	FALSE	FALSE	23.5513	123.814	43.5643	36.8265	19.3231	0.871858	0.999999	0.235154	5.25721	1.84976	1.56367	0.820468	2.8421	FALSE	FALSE	FALSE
NM_018413.2	carbohydrate (chondroitin 4) sulfotransferase 11 (CHST11)	CHST11	FALSE	FALSE	3.59095	18.8777	6.14124	5.61483	2.72397	0.0420982	0.999999	0.00209199	5.25701	1.7102	1.56361	0.758565	3.07392	FALSE	FALSE	FALSE
NM_199001.1	Similar to RIKEN cDNA 2310002J15 gene (MGC59937)	CYSRT1	FALSE	FALSE	15.6665	82.3417	52.8079	24.4911	23.4231	0.0250234	0.732507	0.0731154	5.25591	3.37076	1.56328	1.49511	1.55927	FALSE	FALSE	FALSE
NM_001292.1	CDC-like kinase 3 (CLK3), transcript variant phclk3/152	CLK3	FALSE	FALSE	9.60756	50.4837	30.6884	15.0155	13.612	0.700811	0.999999	0.200588	5.25458	3.19419	1.56289	1.4168	1.64504	FALSE	FALSE	FALSE
BC007252.1	collagen, type II, alpha 1 (primary osteoarthritis, spondyloepiphyseal dysplasia, congenital) (COL2A1)	COL2A1	FALSE	FALSE	10.7947	56.7213	23.0852	16.8708	10.2395	0.279967	0.999999	0.0039146	5.25455	2.13857	1.56287	0.94857	2.45704	FALSE	FALSE	FALSE
BC055314.1	EMG1 nucleolar protein homolog (S. cerevisiae) (EMG1)	EMG1	FALSE	FALSE	10.9129	57.3261	28.8743	17.0506	12.8073	0.0339825	0.999999	0.0132207	5.25305	2.64589	1.56243	1.17359	1.98536	FALSE	FALSE	FALSE
NM_018131.3	Centrosomal protein 55kDa (CEP55), mRNA	CEP55	FALSE	FALSE	9.61747	50.5189	24.1855	15.026	10.7276	0.0917393	0.999999	0.015329	5.25283	2.51475	1.56236	1.11543	2.08881	FALSE	FALSE	FALSE
NM_024048.2	hypothetical protein MGC3020 (MGC3020)	CLUHP3	FALSE	FALSE	12.0629	63.3559	16.5418	18.8441	7.33716	0.065393	0.999999	5.14003e-05	5.25213	1.37129	1.56216	0.608242	3.83006	FALSE	FALSE	FALSE
NM_145063.1	chromosome 6 open reading frame 130 (C6orf130)	OARD1	FALSE	FALSE	11.1709	58.6702	27.1285	17.4504	12.0329	0.291425	0.999999	0.262561	5.25208	2.4285	1.56214	1.07717	2.16268	FALSE	FALSE	FALSE
BC018736.1	viral DNA polymerase-transactivated protein 6 (LOC26010)	SPATS2L	FALSE	FALSE	12.6794	66.5855	41.5165	19.8047	18.4148	0.352601	0.999999	0.450749	5.25147	3.27433	1.56196	1.45234	1.60383	FALSE	FALSE	FALSE
NM_014002.1	Inhibitor of nuclear factor kappa-B kinase subunit epsilon	IKBKE	FALSE	FALSE	9.84318	51.6882	29.2739	15.3738	12.9845	0.347545	0.999999	0.0364196	5.25117	2.97403	1.56187	1.31914	1.76568	FALSE	FALSE	FALSE
Invitrogen: IGFBP6_Recombinant, CAT_PHC9621	IGFBP6 Recombinant Human Protein	IGFBP6	TRUE	FALSE	7.85818	41.2624	11.7141	12.2728	5.19582	0.0624922	0.999999	0	5.25089	1.49069	1.56179	0.661199	3.52246	FALSE	FALSE	FALSE
NM_024697.1	Hypothetical protein FLJ22419 (FLJ22419), mRNA	ZNF385D	FALSE	TRUE	3.61522	18.982	4.67983	5.64587	2.07576	0.479832	0.999999	0.00804662	5.25058	1.29448	1.56169	0.574171	4.05613	FALSE	FALSE	FALSE
NM_014460.2	cold shock domain containing C2, RNA binding (CSDC2)	CSDC2	FALSE	FALSE	26.2797	137.959	58.9471	41.0335	26.1462	0.114699	0.999999	0.0089968	5.24965	2.24307	1.56142	0.994922	2.34039	FALSE	FALSE	FALSE
BC001553.1	chromatin modifying protein 2B (CHMP2B)	CHMP2B	FALSE	FALSE	9.30138	48.8145	21.889	14.519	9.70893	0.308962	0.999999	0.245224	5.2481	2.3533	1.56096	1.04382	2.2301	FALSE	FALSE	FALSE
NM_003254.1	TIMP metallopeptidase inhibitor 1 (TIMP1)	TIMP1	FALSE	FALSE	9.82265	51.5502	22.6794	15.3327	10.0596	0.0319174	0.999999	0.00465518	5.24809	2.30889	1.56096	1.02412	2.27299	FALSE	FALSE	FALSE
NM_004645.1	coilin (COIL)	COIL	FALSE	FALSE	24.0472	126.186	99.4738	37.5317	44.122	0.122805	0.788666	0.441945	5.24741	4.1366	1.56075	1.83481	1.26853	FALSE	FALSE	FALSE
NM_139355.1	megakaryocyte-associated tyrosine kinase (MATK), transcript variant 1	MATK	FALSE	FALSE	25.4412	133.462	69.999	39.6959	31.0483	0.609928	0.999999	0.183546	5.24588	2.7514	1.5603	1.22039	1.90662	FALSE	FALSE	FALSE
NM_001629.2	arachidonate 5-lipoxygenase-activating protein (ALOX5AP)	ALOX5AP	FALSE	FALSE	9.28119	48.6846	18.9385	14.4804	8.40025	0.289236	0.999999	0.0172205	5.24551	2.04053	1.56019	0.905083	2.57066	FALSE	FALSE	FALSE
NM_002395.2	malic enzyme 1, NADP(+)-dependent, cytosolic (ME1)	ME1	FALSE	FALSE	8.03174	42.1232	15.0659	12.5288	6.68256	0.0590076	0.999999	0.000321757	5.24459	1.8758	1.55991	0.832019	2.79592	FALSE	FALSE	FALSE
NM_152323.1	Spi-C transcription factor (Spi-1/PU.1 related) (SPIC)	SPIC	FALSE	FALSE	9.90927	51.9543	16.7243	15.4529	7.41813	0.140901	0.999999	0.00270356	5.243	1.68774	1.55944	0.748605	3.10651	FALSE	FALSE	FALSE
NM_005228.3	epidermal growth factor receptor (erythroblastic leukemia viral (v-erb-b) oncogene homolog, avian) (EGFR); see catalog number for detailed information on wild-type or point mutant status	EGFR	FALSE	FALSE	23.0651	120.906	65.4785	35.9614	29.0432	0.0961348	0.999999	0.0207625	5.24194	2.83885	1.55912	1.25918	1.8465	FALSE	FALSE	FALSE
NM_003826.1	Gamma-soluble NSF attachment protein	NAPG	FALSE	FALSE	10.0769	52.7964	41.377	15.7034	18.3529	0.851686	0.999999	0.407118	5.23935	4.10612	1.55835	1.82129	1.27598	FALSE	FALSE	FALSE
NM_000910.1	neuropeptide Y receptor Y2 (NPY2R)	NPY2R	FALSE	FALSE	7.28913	38.1895	14.8356	11.3588	6.58039	0.148549	0.999999	0.00460385	5.23925	2.03531	1.55832	0.902768	2.57418	FALSE	FALSE	FALSE
BC020786.1	pleiotropic regulator 1 (PRL1 homolog, Arabidopsis) (PLRG1)	PLRG1	FALSE	FALSE	5.95867	31.2166	11.0655	9.28484	4.90812	0.0412453	0.999999	5.14003e-05	5.23886	1.85703	1.55821	0.823694	2.82109	FALSE	FALSE	FALSE
NM001200	BMP2 Recombinant Human Protein	BMP2	FALSE	FALSE	2.43061	12.7318	3.61354	3.78685	1.6028	0.0805568	0.999999	0.00032916	5.2381	1.48668	1.55798	0.659422	3.52336	FALSE	FALSE	FALSE
BC060845.1	L(3)mbt-like 3 (Drosophila), mRNA (cDNA clone MGC:71754 IMAGE:30342272), complete cds	L3MBTL3	FALSE	FALSE	9.52529	49.8792	22.3154	14.8357	9.89808	0.205266	0.999999	0.197576	5.2365	2.34275	1.55751	1.03914	2.23519	FALSE	FALSE	FALSE
NM_001004331.1	similar to CG32662-PA (MGC88374)	CCDC196	FALSE	FALSE	4.35205	22.7883	8.04717	6.77799	3.56935	0.103058	0.999999	0.00278762	5.23622	1.84905	1.55742	0.820153	2.83184	FALSE	FALSE	FALSE
NM_001659.1	ADP-ribosylation factor 3 (ARF3)	ARF3	FALSE	FALSE	5.09815	26.6931	9.03623	7.93941	4.00805	0.459483	0.999999	0.0845659	5.23585	1.77245	1.55731	0.786178	2.95401	FALSE	FALSE	FALSE
NM_138392.1	SH3KBP1-binding protein 1	SHKBP1	FALSE	FALSE	9.10297	47.645	18.1074	14.1712	8.03158	0.0858486	0.999999	0.00653935	5.234	1.98917	1.55676	0.882304	2.63125	FALSE	FALSE	FALSE
BC020898.1	transmembrane protein 182 (TMEM182)	TMEM182	FALSE	FALSE	4.83408	25.2953	6.1569	7.52365	2.73092	0.136694	0.999999	0.000826508	5.2327	1.27364	1.55638	0.56493	4.10845	FALSE	FALSE	FALSE
NM_197975.1	Butyrophilin-like 3 (BTNL3), transcript variant 1, mRNA	BTNL3	FALSE	FALSE	6.61972	34.6366	13.7096	10.302	6.08094	0.168057	0.999999	0.00637178	5.23233	2.07102	1.55627	0.91861	2.52645	FALSE	FALSE	FALSE
NM_006163.1	nuclear factor (erythroid-derived 2), 45kDa (NFE2)	NFE2	FALSE	FALSE	40.8758	213.723	177.099	63.5681	78.553	0.346164	0.999999	0.397491	5.22858	4.33261	1.55515	1.92175	1.2068	FALSE	FALSE	FALSE
NM_001010874.2	steroid 5 alpha-reductase 2-like 2 (SRD5A2L2)	TECRL	FALSE	FALSE	6.49555	33.9415	12.2064	10.0953	5.41419	0.0614528	0.999999	0.00079025	5.22534	1.87919	1.55419	0.833524	2.78063	FALSE	FALSE	FALSE
BC011863.2	DNA helicase HEL308 (HEL308)	HELQ	FALSE	FALSE	10.556	55.1202	20.3283	16.3946	9.01669	0.414328	0.999999	0.0168051	5.22171	1.92576	1.55311	0.854179	2.7115	FALSE	FALSE	FALSE
NM_014904.1	RAB11 family interacting protein 2 (class I) (RAB11FIP2)	RAB11FIP2	TRUE	FALSE	8.08376	42.2038	24.4621	12.5528	10.8503	0.138163	0.999999	0.0432472	5.22081	3.02608	1.55284	1.34223	1.72527	FALSE	FALSE	FALSE
NM_001651.1	aquaporin 5 (AQP5)	AQP5	FALSE	FALSE	6.90051	36.0199	13.3541	10.7135	5.92326	0.0387015	0.999999	0.00496824	5.21989	1.93523	1.55257	0.858379	2.69729	FALSE	FALSE	FALSE
BC009507.1	ISG15 ubiquitin-like modifier (ISG15)	ISG15	FALSE	FALSE	9.66826	50.4615	22.4219	15.0089	9.9453	0.0168833	0.999999	0.00694101	5.2193	2.31912	1.55239	1.02865	2.25055	FALSE	FALSE	FALSE
BC009195.2	heat shock protein 90kDa beta (Grp94), member 1 (HSP90B1)	HSP90B1	FALSE	FALSE	12.9669	67.6735	43.6446	20.1283	19.3587	0.220103	0.999999	0.293022	5.21896	3.36585	1.55229	1.49294	1.55056	FALSE	FALSE	FALSE
BC007609.1	E2F transcription factor 2 (E2F2)	E2F2	FALSE	FALSE	8.50486	44.3659	16.6897	13.1959	7.40278	0.145609	0.999999	0.00177799	5.21654	1.96237	1.55157	0.870418	2.65828	FALSE	FALSE	FALSE
NM_001003841.1	Solute carrier family 6 (neutral amino acid transporter), member 19 (SLC6A19), mRNA	SLC6A19	FALSE	FALSE	9.04098	47.147	15.4059	14.0231	6.83334	0.258373	0.999999	0.0250804	5.21481	1.70401	1.55106	0.755818	3.06032	FALSE	FALSE	FALSE
BC035404.2	PTK2 protein tyrosine kinase 2 (PTK2)	PTK2	FALSE	FALSE	14.5196	75.6993	43.8321	22.5154	19.4419	0.0335244	0.999999	0.0201052	5.2136	3.01883	1.55069	1.33901	1.72703	FALSE	FALSE	FALSE
NM_004952.3	ephrin-A3 (EFNA3)	EFNA3	FALSE	FALSE	6.15542	32.0904	12.7679	9.54473	5.66326	0.0778905	0.999999	0.0347395	5.21336	2.07426	1.55062	0.920045	2.51336	FALSE	FALSE	FALSE
BC001280.1	Serine/threonine-protein kinase 6	AURKA	FALSE	FALSE	18.3055	95.4069	53.6692	28.3771	23.8052	0.0805568	0.999999	0.0278325	5.21192	2.93186	1.5502	1.30044	1.77768	FALSE	FALSE	FALSE
NM_005268.1	gap junction protein, beta 5 (GJB5)	GJB5	FALSE	FALSE	12.8915	67.1798	27.037	19.9815	11.9923	0.0446422	0.999999	0.0491936	5.21118	2.09727	1.54998	0.930254	2.48474	FALSE	FALSE	FALSE
BC025766.1	Leukocyte immunoglobulin-like receptor, subfamily B (with TM and ITIM domains), member 2, mRNA (cDNA clone MGC:34452 IMAGE:5205611), complete cds	LILRB2	FALSE	FALSE	5.24194	27.3166	9.15516	8.12485	4.0608	0.0883165	0.999999	5.14003e-05	5.21116	1.74652	1.54997	0.774676	2.98374	FALSE	FALSE	FALSE
NM_024787.2	RING finger protein 122	RNF122	FALSE	FALSE	4.96338	25.8561	10.0238	7.69044	4.4461	0.077269	0.999999	0.00251914	5.20936	2.01955	1.54944	0.895779	2.57947	FALSE	FALSE	FALSE
BC040280.1	coiled-coil domain containing 83 (CCDC83)	CCDC83	FALSE	FALSE	8.25155	42.9811	16.8858	12.784	7.48974	0.163507	0.999999	0.00375686	5.20884	2.04637	1.54928	0.907676	2.5454	FALSE	FALSE	FALSE
NM_002591.2	phosphoenolpyruvate carboxykinase 1 (soluble) (PCK1)	PCK1	FALSE	FALSE	11.24	58.5232	41.7909	17.4067	18.5365	0.330214	0.999999	0.263379	5.20669	3.71806	1.54864	1.64916	1.40038	FALSE	FALSE	FALSE
NM_005180.1	BMI1 polycomb ring finger oncogene (BMI1)	BMI1	FALSE	FALSE	13.1478	68.4477	23.6093	20.3586	10.472	0.170585	0.999999	0.00175828	5.20604	1.79569	1.54845	0.796485	2.89918	FALSE	FALSE	FALSE
BC029652.1	allantoicase (ALLC)	ALLC	FALSE	FALSE	11.2905	58.7753	24.2364	17.4817	10.7502	0.397793	0.999999	0.203827	5.20572	2.14661	1.54835	0.952139	2.42508	FALSE	FALSE	FALSE
BC026058.1	stromal antigen 3-like (FLJ13195)	STAG3L4	FALSE	FALSE	5.21053	27.1191	7.45118	8.0661	3.305	0.654821	0.999999	0.0196834	5.20467	1.43002	1.54804	0.634292	3.63957	FALSE	FALSE	FALSE
NM_173547.2	tripartite motif-containing 65 (TRIM65)	TRIM65	FALSE	FALSE	4.74736	24.7077	10.6912	7.34887	4.74212	0.0373124	0.999999	0.00272471	5.2045	2.25203	1.54799	0.998896	2.31103	FALSE	FALSE	FALSE
NM_181892.1	ubiquitin-conjugating enzyme E2D 3 (UBC4/5 homolog, yeast) (UBE2D3), transcript variant 8	UBE2D3	FALSE	FALSE	8.85603	46.0734	21.0493	13.7037	9.33649	0.871858	0.999999	0.316708	5.20249	2.37683	1.54739	1.05425	2.18883	FALSE	FALSE	FALSE
BC017702.1	zinc finger, DHHC-type containing 7 (ZDHHC7)	ZDHHC7	FALSE	FALSE	6.89206	35.8503	13.4187	10.6631	5.95191	0.0917882	0.999999	5.14003e-05	5.20169	1.94698	1.54715	0.863589	2.67167	FALSE	FALSE	FALSE
BC029524.1	Coiled-coil domain-containing protein 46	CEP112	FALSE	FALSE	20.0277	104.174	50.8091	30.9846	22.5366	0.871858	0.999999	0.477873	5.20148	2.53694	1.54709	1.12527	2.05029	FALSE	FALSE	FALSE
BC010697.1	RNA-binding protein 40	RNPC3	FALSE	FALSE	11.5788	60.1733	29.9495	17.8975	13.2842	0.207608	0.999999	0.0282792	5.19685	2.58658	1.54571	1.14729	2.00916	FALSE	FALSE	FALSE
NM_145044.1	zinc finger protein 501 (ZNF501)	ZNF501	FALSE	FALSE	6.74378	35.0443	12.8805	10.4233	5.71317	0.0645395	0.999999	0.00294879	5.19654	1.90998	1.54562	0.847177	2.72074	FALSE	FALSE	FALSE
NM_016484.1	PDZ domain containing 11 (PDZD11)	PDZD11	FALSE	FALSE	17.0662	88.6836	51.7731	26.3774	22.9642	0.41192	0.999999	0.1403	5.19644	3.03366	1.54559	1.34559	1.71293	FALSE	FALSE	FALSE
NM_017665.1	Zinc finger CCHC domain-containing protein 10	ZCCHC10	FALSE	FALSE	7.90697	41.0849	22.8121	12.22	10.1184	0.240057	0.999999	0.202898	5.19604	2.88507	1.54547	1.27968	1.80101	FALSE	FALSE	FALSE
NM_152447.2	Leucine rich repeat and fibronectin type III domain containing 5 (LRFN5), mRNA	LRFN5	FALSE	FALSE	5.5763	28.9729	9.64322	8.61749	4.27729	0.411845	0.999999	0.0147578	5.19572	1.72932	1.54538	0.767047	3.00448	FALSE	FALSE	FALSE
BC041339.1	chromosome 22 open reading frame 25 (C22orf25)	TANGO2	FALSE	FALSE	7.18402	37.3153	11.4925	11.0988	5.09755	0.228787	0.999999	0.00434491	5.19422	1.59973	1.54493	0.709568	3.24693	FALSE	FALSE	FALSE
NM_016150.3	ankyrin repeat and SOCS box-containing 2 (ASB2)	ASB2	FALSE	FALSE	2.71231	14.0876	4.67436	4.19011	2.07333	0.157605	0.999999	0.00791193	5.19393	1.72338	1.54484	0.764413	3.0138	FALSE	FALSE	FALSE
NM_171830.1	Calcium-activated potassium channel subunit beta-3	KCNMB3	FALSE	FALSE	9.49714	49.3263	27.6718	14.6712	12.2739	0.849374	0.999999	0.41127	5.1938	2.91369	1.54481	1.29238	1.78255	FALSE	FALSE	FALSE
NM_016364.2	dual specificity phosphatase 13 (DUSP13), transcript variant 6	DUSP13	FALSE	FALSE	15.5031	80.5161	42.9722	23.9481	19.0605	0.466026	0.999999	0.24661	5.19355	2.77185	1.54473	1.22946	1.87368	FALSE	FALSE	FALSE
NM_052887.2	toll-interleukin 1 receptor (TIR) domain containing adaptor protein (TIRAP), transcript variant 1	TIRAP	FALSE	FALSE	8.36395	43.4187	26.2256	12.9141	11.6325	0.255952	0.999999	0.217288	5.19116	3.13556	1.54402	1.39079	1.65558	FALSE	FALSE	FALSE
NM_001250.2	CD40 molecule, TNF receptor superfamily member 5 (CD40), transcript variant 1	CD40	FALSE	FALSE	8.1492	42.2953	18.8088	12.58	8.34269	0.188612	0.999999	0.0375848	5.19012	2.30805	1.54371	1.02374	2.2487	FALSE	FALSE	FALSE
NM_152696.3	homeodomain interacting protein kinase 1	HIPK1	TRUE	FALSE	11.6395	60.4103	33.802	17.968	14.993	0.189126	0.999999	0.0688767	5.1901	2.90407	1.54371	1.28811	1.78718	FALSE	FALSE	FALSE
BC021120.1	RNA binding motif protein 4 (RBM4)	RBM4	FALSE	FALSE	12.1253	62.9074	37.3093	18.7107	16.5487	0.732591	0.999999	0.336808	5.1881	3.07697	1.54311	1.3648	1.6861	FALSE	FALSE	FALSE
NM_020124.1	interferon, kappa (IFNK)	IFNK	FALSE	FALSE	9.14641	47.4463	14.8899	14.1121	6.60448	0.00917768	0.999999	0.00123775	5.18742	1.62795	1.54291	0.722084	3.18647	FALSE	FALSE	FALSE
ENST00000305377	Database:core Gene:ENSG00000170605 Clone:AC027287 Contig:AC027287.21.1.202703 Chr:12 Basepair:55597158 Status:known	OR9K2	FALSE	FALSE	5.03832	26.1341	11.0466	7.77312	4.89974	0.086998	0.999999	0.00831762	5.18705	2.19251	1.5428	0.972494	2.36581	FALSE	FALSE	FALSE
BC000552.1	chromosome 16 open reading frame 67 (C16orf67)	CLUHP3	FALSE	FALSE	10.9546	56.8191	39.1655	16.8999	17.372	0.561371	0.999999	0.389665	5.1868	3.57527	1.54272	1.58582	1.45074	FALSE	FALSE	FALSE
BC004884.2	fucosyltransferase 10 (alpha (1,3) fucosyltransferase) (FUT10)	FUT10	FALSE	FALSE	4.67704	24.2583	8.60528	7.21523	3.8169	0.170207	0.999999	0.0114011	5.18669	1.8399	1.54269	0.816095	2.81901	FALSE	FALSE	FALSE
NM_007099.1	acid phosphatase 1, soluble (ACP1), transcript variant 2	ACP1	FALSE	FALSE	11.4549	59.3964	27.6609	17.6664	12.2691	0.224542	0.999999	0.0435487	5.18523	2.41476	1.54226	1.07108	2.14731	FALSE	FALSE	FALSE
NM_006870.2	destrin (actin depolymerizing factor) (DSTN), transcript variant 1	DSTN	FALSE	FALSE	13.6555	70.7829	41.5341	21.0531	18.4226	0.446124	0.999999	0.547672	5.18349	3.04158	1.54174	1.3491	1.70421	FALSE	FALSE	FALSE
NM_145015.2	MAS-related GPR, member F (MRGPRF), mRNA	MRGPRF	FALSE	FALSE	7.79135	40.3781	16.1419	12.0098	7.15979	0.394258	0.999999	0.0107266	5.18243	2.07177	1.54142	0.918941	2.50145	FALSE	FALSE	FALSE
NM_001664.1	ras homolog gene family, member A (RHOA)	RHOA	FALSE	FALSE	12.4968	64.7223	30.6085	19.2505	13.5765	0.871858	0.999999	0.444019	5.1791	2.4493	1.54043	1.0864	2.11452	FALSE	FALSE	FALSE
NM_173468.2	MOB1, Mps One Binder kinase activator-like 1A (yeast) (MOBKL1A)	MOB1B	FALSE	FALSE	9.12157	47.23	21.1944	14.0478	9.40087	0.646518	0.999999	0.139543	5.17784	2.32355	1.54006	1.03062	2.22842	FALSE	FALSE	FALSE
BC005914.1	Sp2 transcription factor (SP2)	SP2	TRUE	FALSE	41.0925	212.757	86.3015	63.2809	38.2793	0.200229	0.999999	0.0373853	5.17751	2.10017	1.53996	0.93154	2.46528	FALSE	FALSE	FALSE
NM_014473.2	DIM1 dimethyladenosine transferase 1-like (S. cerevisiae) (DIMT1L)	DIMT1	FALSE	FALSE	12.091	62.6001	22.0023	18.6193	9.75919	0.745164	0.999999	0.262593	5.1774	1.81972	1.53993	0.807143	2.84517	FALSE	FALSE	FALSE
BC007340.1	Bystin	BYSL	FALSE	FALSE	9.19672	47.6035	23.4307	14.1588	10.3928	0.34103	0.999999	0.0884592	5.17614	2.54773	1.53955	1.13005	2.03167	FALSE	FALSE	FALSE
NM_031992.1	eukaryotic translation initiation factor 4H (EIF4H), transcript variant 2	EIF4H	FALSE	TRUE	13.9068	71.9691	22.5878	21.406	10.0189	0.747829	0.999999	0.0282792	5.1751	1.62423	1.53925	0.720432	3.18619	FALSE	FALSE	FALSE
BC032842.1	family with sequence similarity 71, member F1, mRNA (cDNA clone MGC:32919 IMAGE:4829634), complete cds.	FAM71F1	FALSE	FALSE	17.7407	91.7881	23.2648	27.3008	10.3192	0.607595	0.999999	0.00973289	5.17386	1.31138	1.53887	0.581666	3.94536	FALSE	FALSE	FALSE
NM_002424.1	matrix metallopeptidase 8 (neutrophil collagenase) (MMP8)	MMP8	FALSE	FALSE	7.68746	39.7602	11.6691	11.826	5.17587	0.0178501	0.999999	0	5.17209	1.51794	1.53835	0.673287	3.40731	FALSE	FALSE	FALSE
NM_004397.3	Probable ATP-dependent RNA helicase DDX6	DDX6	FALSE	FALSE	19.9756	103.31	47.636	30.7277	21.1291	0.300799	0.999999	0.125996	5.17181	2.38471	1.53827	1.05775	2.16873	FALSE	FALSE	FALSE
BC033005.1	PCTAIRE protein kinase 2 (PCTK2)	CDK17	FALSE	FALSE	5.08973	26.3149	11.353	7.82693	5.03565	0.0481735	0.999999	0.0024718	5.1702	2.23056	1.53779	0.989375	2.31789	FALSE	FALSE	FALSE
BC032656.1	transcription factor 7-like 2 (T-cell specific, HMG-box) (TCF7L2)	TCF7L2	FALSE	FALSE	6.98124	36.0915	19.2725	10.7348	8.54837	0.255236	0.999999	0.0266532	5.16979	2.7606	1.53766	1.22448	1.8727	FALSE	FALSE	FALSE
NM_198483.1	RUN and FYVE domain-containing protein 4	RUFY4	FALSE	FALSE	8.60311	44.4642	27.6345	13.2251	12.2574	0.0182549	0.98908	0.0542773	5.16839	3.21215	1.53725	1.42476	1.60901	FALSE	FALSE	FALSE
BC001873.1	hairy/enhancer-of-split related with YRPW motif 1 (HEY1)	HEY1	FALSE	FALSE	8.34081	43.1052	15.3614	12.8209	6.8136	0.10779	0.999999	0.000100095	5.16799	1.84172	1.53713	0.8169	2.80607	FALSE	FALSE	FALSE
BC040457.1	calcium/calmodulin-dependent protein kinase (CaM kinase) II alpha (CAMK2A)	CAMK2A	TRUE	TRUE	10.2888	53.1712	23.5834	15.8148	10.4605	0.739336	0.999999	0.0334559	5.16786	2.29214	1.53709	1.01669	2.2546	FALSE	FALSE	FALSE
NM_177559.2	casein kinase 2, alpha 1 polypeptide (CSNK2A1), transcript variant 1	CSNK2A1	FALSE	TRUE	9.36627	48.3746	35.4158	14.3882	15.7088	0.0321893	0.999999	0.0704104	5.16476	3.78121	1.53617	1.67717	1.3659	FALSE	FALSE	FALSE
NM_001030002.1	Growth factor receptor-bound protein 7	GRB7	FALSE	FALSE	30.3431	156.566	113.846	46.568	50.4967	0.0603733	0.818854	0.37397	5.15986	3.75195	1.53471	1.66419	1.37525	FALSE	FALSE	FALSE
NM_005896.2	Isocitrate dehydrogenase [NADP] cytoplasmic	IDH1	FALSE	FALSE	1.35077	6.96817	30.8968	2.07256	13.7044	0.460302	0.735675	0.417336	5.15865	22.8734	1.53435	10.1456	0.225531	FALSE	FALSE	FALSE
NM_145269.1	Protein FAM92A1	FAM92A1	FALSE	FALSE	20.404	105.186	94.8996	31.2859	42.093	0.712167	0.657539	0.493507	5.15518	4.65102	1.53332	2.06298	1.1084	FALSE	FALSE	FALSE
NM_006749.2	Solute carrier family 20 (phosphate transporter), member 2 (SLC20A2), mRNA	SLC20A2	FALSE	FALSE	3.70962	19.1182	5.5214	5.68639	2.44904	0.031117	0.999999	5.14003e-05	5.15369	1.4884	1.53287	0.660185	3.46257	FALSE	FALSE	FALSE
NM_032643.3	interferon regulatory factor 5 (IRF5), transcript variant 2	IRF5	FALSE	FALSE	4.68522	24.1438	9.62445	7.18115	4.26896	0.35178	0.999999	0.0089968	5.15317	2.05421	1.53272	0.911154	2.50859	FALSE	FALSE	FALSE
NM_022730.1	COP9 constitutive photomorphogenic homolog subunit 7B (Arabidopsis) (COPS7B)	COPS7B	FALSE	FALSE	23.1531	119.266	72.6557	35.4736	32.2267	0.0982313	0.819804	0.204321	5.15118	3.13805	1.53213	1.3919	1.64152	FALSE	FALSE	FALSE
NM_020854.2	KIAA1468 (KIAA1468)	KIAA1468	FALSE	FALSE	14.8959	76.7087	34.5799	22.8157	15.3381	0.51231	0.999999	0.218971	5.14966	2.32144	1.53168	1.02969	2.2183	FALSE	FALSE	FALSE
BC015848.1	glyoxalase domain containing 4 (GLOD4)	GLOD4	FALSE	FALSE	6.22562	32.0546	12.3433	9.53408	5.4749	0.28473	0.999999	0.0441182	5.14881	1.98265	1.53143	0.879413	2.59693	FALSE	FALSE	FALSE
BC026175.1	activating transcription factor 2 (ATF2)	ATF2	TRUE	FALSE	4.32541	22.2684	6.74107	6.62335	2.99003	0.0260115	0.999999	5.14003e-05	5.14827	1.55848	1.53126	0.69127	3.30339	FALSE	FALSE	FALSE
NM_032490.2	chromosome 14 open reading frame 142 (C14orf142)	GON7	FALSE	FALSE	4.74966	24.4516	9.18042	7.27269	4.07201	0.329277	0.999999	0.0148531	5.14807	1.93286	1.5312	0.857327	2.66345	FALSE	FALSE	FALSE
NM_022905.2	tetratricopeptide repeat domain 23 (TTC23), transcript variant 2	TTC23	FALSE	FALSE	11.105	57.1564	35.6002	17.0002	15.7906	0.440146	0.999999	0.389973	5.14692	3.20579	1.53086	1.42194	1.60551	FALSE	FALSE	FALSE
NM_182906.1	C-type lectin domain family 10, member A (CLEC10A), transcript variant 1	CLEC10A	FALSE	FALSE	6.07243	31.2438	10.1847	9.29293	4.51744	0.189126	0.999999	0.000668819	5.14519	1.6772	1.53035	0.743927	3.06773	FALSE	FALSE	FALSE
BC058036.1	folate receptor 2 (fetal) (FOLR2)	FOLR2	FALSE	FALSE	8.80784	45.3073	18.6722	13.4759	8.28212	0.452784	0.999999	0.0239451	5.14398	2.11995	1.52999	0.940312	2.42646	FALSE	FALSE	FALSE
NM_080548.1	Tyrosine-protein phosphatase non-receptor type 6	PTPN6	FALSE	FALSE	10.9228	56.1797	30.247	16.7097	13.4162	0.26568	0.999999	0.234269	5.14334	2.76916	1.5298	1.22827	1.85736	FALSE	FALSE	FALSE
BC017869.1	F-box protein 36 (FBXO36)	FBXO36	FALSE	FALSE	17.2222	88.5624	41.0529	26.3414	18.2092	0.10527	0.999999	0.067998	5.14234	2.38372	1.5295	1.05731	2.15728	FALSE	FALSE	FALSE
NM_203418.1	regulator of calcineurin 1 (RCAN1), transcript variant 3	RCAN1	FALSE	FALSE	12.6616	65.086	34.4565	19.3587	15.2833	0.179282	0.999999	0.124584	5.14041	2.72133	1.52893	1.20706	1.88893	FALSE	FALSE	FALSE
NM_139313.1	YME1-like 1 (S. cerevisiae) (YME1L1), nuclear gene encoding mitochondrial protein, transcript variant 2	YME1L1	FALSE	FALSE	5.87097	30.1452	9.0389	8.96615	4.00924	0.0387599	0.999999	5.14003e-05	5.13461	1.53959	1.5272	0.682892	3.33505	FALSE	FALSE	FALSE
BC020733.1	sushi-repeat-containing protein, X-linked 2 (SRPX2)	SRPX2	FALSE	FALSE	4.96176	25.4748	7.82268	7.57703	3.46978	0.326036	0.999999	0.00541488	5.13422	1.57659	1.52709	0.699304	3.25653	FALSE	FALSE	FALSE
BC047420.1	UBX domain-containing protein 7	UBXN7	FALSE	FALSE	12.145	62.3544	52.9674	18.5462	23.4939	0.169223	0.559181	0.395543	5.13418	4.36126	1.52707	1.93445	1.17722	FALSE	FALSE	FALSE
NM_002734.1	protein kinase, cAMP-dependent, regulatory, type I, alpha (tissue specific extinguisher 1) (PRKAR1A), transcript variant 1	PRKAR1A	FALSE	FALSE	11.2961	57.9823	38.9368	17.2458	17.2706	0.799963	0.999999	0.298838	5.13293	3.44691	1.5267	1.52889	1.48914	FALSE	FALSE	FALSE
NM_016204.1	growth differentiation factor 2 (GDF2)	GDF2	FALSE	FALSE	6.18885	31.7455	9.63876	9.44216	4.27531	0.0857942	0.999999	5.14003e-05	5.12947	1.55744	1.52567	0.690808	3.29353	FALSE	FALSE	FALSE
NM_004722.2	adaptor-related protein complex 4, mu 1 subunit (AP4M1)	AP4M1	FALSE	FALSE	17.5278	89.8819	58.6974	26.7338	26.0355	0.0533125	0.884324	0.110713	5.12796	3.34881	1.52522	1.48538	1.53128	FALSE	FALSE	FALSE
BC017888.1	coiled-coil domain containing 132 (CCDC132)	VPS50	FALSE	FALSE	8.5508	43.8422	18.9393	13.0401	8.40061	0.604796	0.999999	0.171095	5.12726	2.21492	1.52501	0.982436	2.31487	FALSE	FALSE	FALSE
NM_003068.2	snail homolog 2 (Drosophila) (SNAI2)	SNAI2	FALSE	FALSE	9.01389	46.2148	24.82	13.7458	11.009	0.0436965	0.999999	0.0376782	5.12706	2.75353	1.52496	1.22134	1.862	FALSE	FALSE	FALSE
NM_182503.1	adenosine deaminase, tRNA-specific 2, TAD2 homolog (S. cerevisiae) (ADAT2)	ADAT2	FALSE	FALSE	9.61762	49.3085	30.4835	14.6659	13.5211	0.371682	0.999999	0.184516	5.12689	3.16955	1.5249	1.40586	1.61755	FALSE	FALSE	FALSE
NM_148912.2	abhydrolase domain containing 11 (ABHD11)	ABHD11	FALSE	FALSE	10.6625	54.6054	34.3804	16.2414	15.2495	0.503314	0.999999	0.377238	5.12124	3.22441	1.52322	1.4302	1.58827	FALSE	FALSE	FALSE
NM_020412.1	chromatin modifying protein 1B (CHMP1B)	CHMP1B	FALSE	FALSE	9.14643	46.8231	21.8197	13.9267	9.67819	0.0991609	0.999999	0.0151477	5.11927	2.38559	1.52264	1.05814	2.14591	FALSE	FALSE	FALSE
NM_181718.3	aspartate beta-hydroxylase domain containing 1 (ASPHD1)	ASPHD1	FALSE	FALSE	7.44786	38.1246	11.8259	11.3395	5.24544	0.577035	0.999999	0.093242	5.11887	1.58783	1.52252	0.704289	3.22381	FALSE	FALSE	FALSE
BC064806.1	Natural cytotoxicity triggering receptor 1, mRNA (cDNA clone MGC:65100 IMAGE:5218848), complete cds	NCR1	FALSE	FALSE	3.66744	18.7701	7.23396	5.58286	3.20865	0.310505	0.999999	0.00347645	5.11805	1.97248	1.52228	0.874901	2.59473	FALSE	FALSE	FALSE
NM_080916.1	deoxyguanosine kinase (DGUOK), nuclear gene encoding mitochondrial protein, transcript variant 1	DGUOK	FALSE	FALSE	7.59781	38.877	15.4459	11.5633	6.85107	0.0252984	0.999999	0.0118636	5.11687	2.03294	1.52192	0.901717	2.51698	FALSE	FALSE	FALSE
BC038293.2	Phosphatase and tensin homolog (mutated in multiple advanced cancers 1), pseudogene 1, mRNA (cDNA clone MGC:33131 IMAGE:5269676), complete cds	PTENP1	FALSE	FALSE	3.54164	18.12	7.63821	5.38949	3.38796	0.0592936	0.999999	0.00156762	5.11628	2.15669	1.52175	0.956608	2.37228	FALSE	FALSE	FALSE
NM_006496.1	guanine nucleotide binding protein (G protein), alpha inhibiting activity polypeptide 3 (GNAI3)	GNAI3	FALSE	FALSE	9.35406	47.8517	17.4804	14.2327	7.75348	0.0685908	0.999999	0.00493011	5.11561	1.86875	1.52155	0.828889	2.73746	FALSE	FALSE	FALSE
NM_182719.1	CAMP responsive element modulator (CREM), transcript variant 6, mRNA	CREM	FALSE	FALSE	5.25337	26.8444	13.2508	7.98441	5.87746	0.231326	0.999999	0.0218492	5.10994	2.52235	1.51986	1.1188	2.02587	FALSE	FALSE	FALSE
NM_006873.2	stonin 1 (STON1)	STON1	FALSE	FALSE	15.987	81.6814	70.6065	24.2947	31.3178	0.14534	0.74969	0.421382	5.10925	4.4165	1.51966	1.95896	1.15685	FALSE	FALSE	FALSE
NM_178151.1	doublecortex; lissencephaly, X-linked (doublecortin) (DCX), transcript variant 4	DCX	FALSE	FALSE	9.49007	48.4837	25.2275	14.4206	11.1898	0.0945683	0.999999	0.0418989	5.10889	2.6583	1.51955	1.1791	1.92186	FALSE	FALSE	FALSE
BC032474.1	toll-interleukin 1 receptor (TIR) domain containing adaptor protein (TIRAP)	TIRAP	FALSE	FALSE	9.85996	50.3616	34.3844	14.9792	15.2513	0.239327	0.999999	0.135263	5.10769	3.48727	1.51919	1.54679	1.46467	FALSE	FALSE	FALSE
BC009239.2	E3 ubiquitin-protein ligase LRSAM1	LRSAM1	FALSE	FALSE	12.1542	62.0722	42.1791	18.4623	18.7087	0.543683	0.966368	0.584075	5.10707	3.47034	1.51901	1.53928	1.47163	FALSE	FALSE	FALSE
BC100982.2	Cytochrome P450, family 3, subfamily A, polypeptide 43, mRNA (cDNA clone MGC:119316 IMAGE:40005402), complete cds	CYP3A43	FALSE	FALSE	7.61538	38.8811	20.752	11.5645	9.20464	0.159745	0.999999	0.0260648	5.10561	2.72501	1.51857	1.20869	1.87361	FALSE	FALSE	FALSE
BC073937.1	Immunoglobulin kappa constant, mRNA (cDNA clone MGC:90448 IMAGE:5226105), complete cds	IGKC	FALSE	FALSE	5.50046	28.0805	8.75776	8.35205	3.88454	0.147565	0.999999	0.000944771	5.10511	1.59219	1.51843	0.70622	3.20635	FALSE	FALSE	FALSE
BC047363.1	DnaJ (Hsp40) homolog, subfamily C, member 16 (DNAJC16)	DNAJC16	FALSE	FALSE	5.41348	27.626	11.3316	8.21687	5.02615	0.12278	0.999999	0.0527385	5.10318	2.09321	1.51785	0.928451	2.43797	FALSE	FALSE	FALSE
NM_144620.1	leucine rich repeat containing 39 (LRRC39)	LRRC39	FALSE	FALSE	6.04677	30.8562	18.962	9.17763	8.41068	0.085081	0.999999	0.0533661	5.10292	3.1359	1.51778	1.39094	1.62726	FALSE	FALSE	FALSE
BC019102.1	Dedicator of cytokinesis protein 8	DOCK8	FALSE	FALSE	11.3676	58.0069	39.8942	17.2532	17.6952	0.618745	0.999999	0.576558	5.10283	3.50947	1.51775	1.55664	1.45402	FALSE	FALSE	FALSE
NM_014220.2	Transmembrane 4 L6 family member 1	TM4SF1	FALSE	FALSE	11.4184	58.2579	30.0848	17.3278	13.3442	0.871858	0.999999	0.305449	5.1021	2.63477	1.51753	1.16866	1.93645	FALSE	FALSE	FALSE
BC071674.1	Ribosomal protein S16, mRNA (cDNA clone MGC:87876 IMAGE:5394209), complete cds	RPS16	FALSE	FALSE	2.60545	13.287	5.14063	3.95199	2.28014	0.171799	0.999999	0.00206613	5.09969	1.97303	1.51682	0.875143	2.58471	FALSE	FALSE	FALSE
NM_014791.1	a serine/threonione kinase	MELK	FALSE	FALSE	9.47497	48.3036	13.3753	14.3671	5.93266	0.865075	0.999999	0.0680592	5.09802	1.41165	1.51632	0.62614	3.6114	FALSE	FALSE	FALSE
NM_024790.2	centrosome and spindle pole associated protein 1 (CSPP1), transcript variant 2	CSPP1	FALSE	FALSE	14.5791	74.2977	33.5478	22.0986	14.8803	0.331019	0.999999	0.015233	5.09616	2.30108	1.51577	1.02065	2.21468	FALSE	FALSE	FALSE
BC026100.2	testis-specific transcript, Y-linked 8	TTTY8B	FALSE	FALSE	15.8503	80.7737	23.104	24.0247	10.2479	0.139612	0.999999	0.00278095	5.09604	1.45764	1.51573	0.646541	3.49609	FALSE	FALSE	FALSE
NM_014920.1	Intestinal cell kinase (ICK), mRNA	ICK	FALSE	FALSE	13.1359	66.936	33.6355	19.909	14.9191	0.663914	0.999999	0.0301958	5.09564	2.56057	1.51561	1.13575	1.99004	FALSE	FALSE	FALSE
NM_005678.3	SNRPN upstream reading frame (SNURF), transcript variant 1	SNURF	FALSE	FALSE	23.5908	120.201	51.982	35.7516	23.0568	0.262116	0.999999	0.11363	5.09523	2.20348	1.51549	0.977363	2.31235	FALSE	FALSE	FALSE
BC050524.1	Chondroitin sulfate proteoglycan 2 (versican), mRNA (cDNA clone IMAGE:5218077), complete cds	VCAN	FALSE	TRUE	5.47395	27.8876	10.359	8.29468	4.59476	0.328538	0.999999	0.0028616	5.0946	1.89241	1.5153	0.839386	2.69212	FALSE	FALSE	FALSE
NM_002744.2	protein kinase C, zeta (PRKCZ), transcript variant 1	PRKCZ	TRUE	FALSE	5.25451	26.7488	11.5497	7.95597	5.12292	0.293409	0.999999	0.0039128	5.09064	2.19806	1.51412	0.974958	2.31597	FALSE	FALSE	FALSE
BC000250.1	non-metastatic cells 3, protein expressed in (NME3)	NME3	FALSE	FALSE	8.97573	45.6862	23.9278	13.5886	10.6133	0.576664	0.999999	0.420325	5.08997	2.66584	1.51392	1.18244	1.90933	FALSE	FALSE	FALSE
NM_015679.1	TruB pseudouridine (psi) synthase homolog 2 (E. coli) (TRUB2)	TRUB2	FALSE	FALSE	9.87978	50.2491	25.6364	14.9457	11.3711	0.138163	0.999999	0.0175201	5.08605	2.59484	1.51276	1.15095	1.96007	FALSE	FALSE	FALSE
NM_031302.2	glycosyltransferase 8 domain containing 2 (GLT8D2)	GLT8D2	FALSE	FALSE	6.80095	34.5778	12.3904	10.2846	5.49582	0.35831	0.999999	0.00338656	5.08426	1.82187	1.51223	0.808096	2.79069	FALSE	FALSE	FALSE
BC025314.1	immunoglobulin heavy constant gamma 1 (G1m marker) (IGHG1)	IGHG1	FALSE	FALSE	13.6195	69.2424	58.2641	20.5949	25.8432	0.449584	0.902567	0.521332	5.08406	4.27799	1.51217	1.89752	1.18842	FALSE	FALSE	FALSE
NM_018649.1	H2A histone family, member Y2 (H2AFY2)	H2AFY2	FALSE	FALSE	6.37308	32.3927	17.8176	9.63466	7.90308	0.239327	0.999999	0.122003	5.08275	2.79577	1.51177	1.24007	1.81801	FALSE	FALSE	FALSE
NM_006398.2	Ubiquitin D	UBD	FALSE	FALSE	11.4124	57.9947	27.5113	17.2495	12.2027	0.64267	0.999999	0.335271	5.08173	2.41065	1.51147	1.06925	2.10803	FALSE	FALSE	FALSE
NM_002623.2	prefoldin subunit 4 (PFDN4)	PFDN4	FALSE	FALSE	5.16227	26.226	14.7521	7.80047	6.54336	0.0924124	0.999999	0.0121456	5.08033	2.85768	1.51106	1.26754	1.77778	FALSE	FALSE	FALSE
NM_000298.4	Pyruvate kinase isozymes R/L	PKLR	FALSE	FALSE	9.76719	49.6067	47.2209	14.7547	20.945	0.655451	0.999999	0.558131	5.07891	4.83465	1.51063	2.14443	1.05052	FALSE	FALSE	FALSE
BC034984.1	Kinesin-like protein KIF16B	KIF16B	FALSE	FALSE	5.60055	28.4401	11.0634	8.45903	4.90719	0.293506	0.999999	0.0326689	5.0781	1.97541	1.51039	0.876199	2.57066	FALSE	FALSE	FALSE
BC024038.1	tubulin, beta 2C (TUBB2C)	TUBB4B	TRUE	FALSE	6.39622	32.4797	12.4793	9.66054	5.53524	0.334797	0.999999	0.00303802	5.07796	1.95104	1.51035	0.865393	2.60269	FALSE	FALSE	FALSE
BC032108.1	vacuolar protein sorting 52 homolog (S. cerevisiae) (VPS52)	VPS52	FALSE	FALSE	8.67076	44.0217	16.698	13.0935	7.40646	0.332404	0.999999	0.097115	5.07703	1.92578	1.51007	0.854188	2.63634	FALSE	FALSE	FALSE
NM_006699.3	mannosidase, alpha, class 1A, member 2 (MAN1A2)	MAN1A2	FALSE	FALSE	6.47853	32.8833	11.7269	9.78058	5.20152	0.517524	0.999999	0.0532122	5.07574	1.81012	1.50969	0.802886	2.80409	FALSE	FALSE	FALSE
NM_002927.3	regulator of G-protein signaling 13 (RGS13), transcript variant 1	RGS13	FALSE	FALSE	11.3712	57.7165	33.9007	17.1668	15.0368	0.157977	0.999999	0.167492	5.07566	2.98127	1.50967	1.32235	1.70252	FALSE	FALSE	FALSE
NM_005041.3	Perforin 1 (pore forming protein) (PRF1), mRNA	PRF1	FALSE	FALSE	5.7663	29.2677	10.8898	8.70518	4.83019	0.145511	0.999999	0.00736347	5.07565	1.88852	1.50966	0.837659	2.68764	FALSE	FALSE	FALSE
NM_005205.2	cytochrome c oxidase subunit VIa polypeptide 2 (COX6A2), nuclear gene encoding mitochondrial protein	COX6A2	FALSE	FALSE	9.99024	50.6848	22.757	15.0753	10.094	0.662106	0.999999	0.215395	5.07343	2.27792	1.509	1.01038	2.22721	FALSE	FALSE	FALSE
NM_000576.1	interleukin 1, beta (IL1B)	IL1B	FALSE	FALSE	9.77519	49.5847	33.3438	14.7481	14.7898	0.255431	0.999999	0.128597	5.07251	3.41107	1.50873	1.51299	1.48707	FALSE	FALSE	FALSE
BC032589.1	Beta-2-microglobulin	B2M	FALSE	FALSE	11.6782	59.2195	27.0335	17.6138	11.9908	0.620149	0.999999	0.210577	5.07096	2.31487	1.50827	1.02677	2.1906	FALSE	FALSE	FALSE
BC025767.1	Rhophilin-1	RHPN1	FALSE	FALSE	8.58146	43.5106	19.217	12.9415	8.52376	0.430851	0.999999	0.0578296	5.0703	2.23936	1.50807	0.993275	2.26418	FALSE	FALSE	FALSE
NM_004567.2	6-phosphofructo-2-kinase/fructose-2,6-biphosphatase 4 (PFKFB4)	PFKFB4	FALSE	FALSE	20.1187	101.995	64.1319	30.3367	28.4459	0.381984	0.999999	0.115587	5.06968	3.18768	1.50789	1.41391	1.5904	FALSE	FALSE	FALSE
NM_138573.1	neuregulin 4 (NRG4)	NRG4	FALSE	FALSE	11.4797	58.1955	23.7172	17.3093	10.5198	0.375495	0.999999	0.00347645	5.06945	2.06602	1.50782	0.91639	2.45373	FALSE	FALSE	FALSE
NM_014596.3	zinc ribbon domain containing 1 (ZNRD1), transcript variant b	ZNRD1	FALSE	FALSE	15.2304	77.2015	27.9207	22.9622	12.3843	0.871858	0.999999	0.164905	5.06889	1.83321	1.50765	0.813129	2.76503	FALSE	FALSE	FALSE
NM_007029.1	stathmin-like 2 (STMN2)	STMN2	FALSE	FALSE	6.39622	32.4027	14.9688	9.63762	6.63945	0.149523	0.999999	0.00363656	5.06591	2.34025	1.50677	1.03803	2.16469	FALSE	FALSE	FALSE
NM_001721.2	BMX non-receptor tyrosine kinase (BMX), transcript variant 2	BMX	FALSE	FALSE	20.7484	105.109	57.1255	31.263	25.3382	0.0786015	0.999999	0.100885	5.0659	2.75325	1.50676	1.22121	1.83997	FALSE	FALSE	FALSE
NM_174922.3	Uncharacterized aarF domain-containing protein kinase 5	ADCK5	FALSE	FALSE	6.19812	31.3954	10.8212	9.33801	4.79976	0.804535	0.999999	0.00246166	5.0653	1.74588	1.50659	0.774389	2.9013	FALSE	FALSE	FALSE
NM_024881.3	Solute carrier family 35, member E1 (SLC35E1), mRNA	SLC35E1	FALSE	FALSE	7.3239	37.084	12.9352	11.03	5.73744	0.246396	0.999999	0.0109698	5.06342	1.76616	1.50603	0.783386	2.86691	FALSE	FALSE	FALSE
NM_004553.1	NADH dehydrogenase (ubiquinone) Fe-S protein 6, 13kDa (NADH-coenzyme Q reductase) (NDUFS6)	NDUFS6	FALSE	FALSE	10.2505	51.8986	35.3691	15.4364	15.6881	0.0820015	0.999999	0.108296	5.06303	3.45047	1.50591	1.53047	1.46734	FALSE	FALSE	FALSE
BC005373.1	mitochondrial ribosomal protein S18B (MRPS18B)	MRPS18B	FALSE	FALSE	5.74565	29.0798	11.9449	8.64927	5.29822	0.512935	0.999999	0.0106299	5.06118	2.07895	1.50536	0.922128	2.43448	FALSE	FALSE	FALSE
BC029760.1	OTU domain containing 6B (OTUD6B)	OTUD6B	FALSE	FALSE	12.9662	65.6079	40.753	19.5139	18.0761	0.206102	0.999999	0.287708	5.05992	3.14302	1.50499	1.3941	1.60989	FALSE	FALSE	FALSE
NM_153043.3	hypothetical protein FLJ37078 (FLJ37078)	SRRM3	FALSE	FALSE	42.5504	215.236	103.658	64.0183	45.9781	0.871858	0.999999	0.195997	5.05839	2.43613	1.50453	1.08056	2.0764	FALSE	FALSE	FALSE
NM_006408.2	anterior gradient homolog 2 (Xenopus laevis) (AGR2)	AGR2	FALSE	FALSE	11.8128	59.7481	32.2185	17.771	14.2906	0.0835753	0.999999	0.0125041	5.05791	2.72742	1.50439	1.20976	1.85446	FALSE	FALSE	FALSE
BC056669.1	DCN1, defective in cullin neddylation 1, domain containing 2 (S. cerevisiae) (DCUN1D2)	DCUN1D2	FALSE	FALSE	4.58233	23.1721	7.78569	6.89214	3.45337	0.188682	0.999999	0.00177799	5.05684	1.69907	1.50407	0.753628	2.97624	FALSE	FALSE	FALSE
NM_002974.1	serpin peptidase inhibitor, clade B (ovalbumin), member 4 (SERPINB4)	SERPINB4	FALSE	FALSE	7.03369	35.5672	21.9239	10.5789	9.72445	0.3976	0.999999	0.320257	5.05669	3.11699	1.50402	1.38255	1.6223	FALSE	FALSE	FALSE
BC046131.1	COMM domain containing 2 (COMMD2)	COMMD2	FALSE	FALSE	5.33969	26.9922	12.1234	8.02837	5.3774	0.412411	0.999999	0.0784813	5.05501	2.27044	1.50353	1.00706	2.22645	FALSE	FALSE	FALSE
NM_001001786.1	BRCC2 (BRCC2), mRNA	BLID	FALSE	FALSE	6.75246	34.1174	13.1701	10.1476	5.84163	0.576664	0.999999	0.0149102	5.05258	1.95041	1.5028	0.865111	2.59052	FALSE	FALSE	FALSE
BC033710.2	RAD54 homolog B (S. cerevisiae) (RAD54B)	RAD54B	FALSE	FALSE	9.60496	48.5106	19.5345	14.4286	8.6646	0.308099	0.999999	0.142051	5.05058	2.03379	1.50221	0.902097	2.48333	FALSE	FALSE	FALSE
NM_007122.1	upstream transcription factor 1 (USF1), transcript variant 1	USF1	FALSE	FALSE	14.8456	74.9777	34.4384	22.3008	15.2753	0.134806	0.999999	0.06995	5.0505	2.31977	1.50218	1.02894	2.17716	FALSE	FALSE	FALSE
BC017387.1	Secreted phosphoprotein 1 (osteopontin, bone sialoprotein I, early T-lymphocyte activation 1), mRNA (cDNA clone MGC:22826 IMAGE:3828885), complete cds	SPP1	TRUE	FALSE	9.41922	47.5646	23.5988	14.1473	10.4674	0.256929	0.999999	0.0403032	5.04974	2.50539	1.50196	1.11128	2.01555	FALSE	FALSE	FALSE
BC012746.1	mesoderm development candidate 2 (MESDC2)	MESDC2	FALSE	FALSE	3.97324	20.0611	7.59459	5.96683	3.36861	0.366048	0.999999	0.0227509	5.04905	1.91143	1.50175	0.847823	2.6415	FALSE	FALSE	FALSE
BC040955.1	bactericidal/permeability-increasing protein (BPI)	BPI	FALSE	FALSE	5.91365	29.8558	10.5447	8.88008	4.67715	0.447451	0.999999	0.0140984	5.04862	1.78312	1.50162	0.790908	2.83135	FALSE	FALSE	FALSE
NM_000167.1	glycerol kinase (GK), transcript variant 2	GK	FALSE	FALSE	5.30206	26.7674	11.2042	7.9615	4.96968	0.455402	0.999999	0.0240217	5.04849	2.11318	1.50159	0.937311	2.38905	FALSE	FALSE	FALSE
NM_174899.3	F-box protein 36 (FBXO36)	FBXO36	FALSE	FALSE	5.72862	28.9098	11.8986	8.59871	5.27769	0.0203168	0.999999	0.00138452	5.04655	2.07705	1.50101	0.921284	2.42967	FALSE	FALSE	FALSE
BC011239.1	transcobalamin II; macrocytic anemia (TCN2)	TCN2	FALSE	FALSE	5.08159	25.6435	8.06884	7.62722	3.57897	0.568302	0.999999	0.0140721	5.04635	1.58786	1.50095	0.7043	3.17809	FALSE	FALSE	FALSE
BC038467.1	Vitelline membrane outer layer protein 1 homolog	VMO1	FALSE	FALSE	10.1592	51.2415	28.2491	15.2409	12.53	0.339713	0.999999	0.0361917	5.04385	2.78064	1.50021	1.23336	1.81392	FALSE	FALSE	FALSE
NM_032377.2	elongation factor 1 homolog (S. cerevisiae) (ELOF1)	ELOF1	FALSE	FALSE	14.1177	71.2075	39.667	21.1794	17.5945	0.174639	0.999999	0.214043	5.04384	2.80974	1.5002	1.24627	1.79513	FALSE	FALSE	FALSE
BC059384.1	glutamate receptor, ionotropic, N-methyl D-aspartate 2C (GRIN2C)	GRIN2C	FALSE	FALSE	7.17857	36.203	13.6653	10.768	6.06127	0.241564	0.999999	0.000644682	5.04321	1.90362	1.50001	0.844356	2.64928	FALSE	FALSE	FALSE
NM_018199.1	exonuclease 3'-5' domain-like 2 (EXDL2)	EXD2	FALSE	FALSE	9.85481	49.6704	20.0014	14.7736	8.87168	0.262796	0.999999	0.0706254	5.04022	2.0296	1.49913	0.900238	2.48335	FALSE	FALSE	FALSE
NM_004633.3	interleukin 1 receptor, type II (IL1R2), transcript variant 1	IL1R2	FALSE	FALSE	8.2053	41.3507	17.7093	12.2991	7.85504	0.0310064	0.999999	0.000895213	5.03951	2.15828	1.49892	0.957313	2.33497	FALSE	FALSE	FALSE
NM_033516.4	Protein kinase NYD-SP25 (NYD-SP25), transcript variant 1, mRNA	TPD52L3	FALSE	FALSE	7.98471	40.2305	15.397	11.9659	6.82942	0.112899	0.999999	0.00150426	5.03845	1.92832	1.4986	0.855312	2.61287	FALSE	FALSE	FALSE
XM_378661.1	PREDICTED: Homo sapiens chromosome 17 open reading frame 51 (C17orf51)	C17orf51	FALSE	FALSE	5.55431	27.9766	10.7907	8.32115	4.78627	0.181331	0.999999	0.00412738	5.03692	1.94277	1.49814	0.861723	2.59264	FALSE	FALSE	FALSE
NM_013354.4	CCR4-NOT transcription complex, subunit 7 (CNOT7), transcript variant 1	CNOT7	FALSE	FALSE	9.42023	47.4418	21.3963	14.1107	9.49042	0.158284	0.999999	0.0134769	5.03616	2.27132	1.49792	1.00745	2.21729	FALSE	FALSE	FALSE
BC008466.1	Dolichyl-phosphate mannosyltransferase polypeptide 1, catalytic subunit, mRNA (cDNA clone MGC:14731 IMAGE:4276338), complete cds	DPM1	FALSE	FALSE	14.0486	70.744	40.5074	21.0416	17.9672	0.321521	0.999999	0.110867	5.03568	2.88338	1.49778	1.27894	1.74645	FALSE	FALSE	FALSE
BC031062.1	DEAD (Asp-Glu-Ala-Asp) box polypeptide 20 (DDX20)	DDX20	FALSE	FALSE	11.3971	57.356	27.6723	17.0595	12.2741	0.59418	0.999999	0.0987832	5.03249	2.428	1.49683	1.07695	2.07269	FALSE	FALSE	FALSE
NM_054023.2	secretoglobin, family 3A, member 2 (SCGB3A2)	SCGB3A2	FALSE	FALSE	12.1924	61.3454	35.7173	18.2461	15.8426	0.871858	0.999999	0.293788	5.03145	2.92948	1.49652	1.29938	1.71752	FALSE	FALSE	FALSE
NM_001011658.1	trafficking protein particle complex 2 (TRAPPC2), transcript variant 1	TRAPPC2	FALSE	FALSE	19.2067	96.6267	50.7741	28.7399	22.521	0.112056	0.999999	0.0432472	5.03088	2.64356	1.49635	1.17256	1.90307	FALSE	FALSE	FALSE
BC011399.1	spleen tyrosine kinase (SYK)	SYK	FALSE	FALSE	5.45411	27.4371	14.8782	8.16069	6.59929	0.132406	0.999999	0.0346965	5.03053	2.72789	1.49625	1.20997	1.84411	FALSE	FALSE	FALSE
NM_177996.1	erythrocyte membrane protein band 4.1-like 1 (EPB41L1), transcript variant 2	EPB41L1	TRUE	TRUE	26.24	131.964	67.542	39.2504	29.9585	0.283643	0.999999	0.0471446	5.02911	2.57401	1.49582	1.14171	1.9538	FALSE	FALSE	FALSE
BC013386.1	Hypothetical protein FLJ14466, mRNA (cDNA clone MGC:22830 IMAGE:3838524), complete cds	ORAI1	FALSE	FALSE	11.9073	59.8755	28.5911	17.8089	12.6817	0.313363	0.999999	0.0594672	5.02848	2.40114	1.49563	1.06503	2.0942	FALSE	FALSE	FALSE
BC022014.2	Parkinson disease (autosomal recessive, juvenile) 2, parkin, mRNA (cDNA clone MGC:26491 IMAGE:4824892), complete cds	PARK2	FALSE	FALSE	4.80799	24.1719	8.68781	7.18952	3.85351	0.258961	0.999999	0.00877302	5.02744	1.80695	1.49533	0.80148	2.78228	FALSE	FALSE	FALSE
NM_032905.3	Splicing factor 45	RBM17	FALSE	FALSE	17.9683	90.3308	45.8539	26.8673	20.3387	0.170585	0.999999	0.065064	5.02723	2.55193	1.49526	1.13192	1.96997	FALSE	FALSE	FALSE
BC046129.1	UDP-N-acetyl-alpha-D-galactosamine:polypeptide N-acetylgalactosaminyltransferase 7 (GalNAc-T7) (GALNT7)	GALNT7	FALSE	FALSE	4.56896	22.9558	6.4422	6.82782	2.85746	0.176367	0.999999	0.00590543	5.0243	1.40999	1.49439	0.625406	3.56335	FALSE	FALSE	FALSE
XM_371714.1	PREDICTED	OR1N2	FALSE	FALSE	7.9901	40.1271	32.9007	11.9351	14.5932	0.147553	0.999999	0.247619	5.02211	4.11768	1.49374	1.82641	1.21964	FALSE	FALSE	FALSE
NM_005651.1	tryptophan 2,3-dioxygenase (TDO2)	TDO2	FALSE	FALSE	18.8791	94.78	6.93978	28.1907	3.07816	0.102821	0.999999	0	5.02038	0.367591	1.49322	0.163046	13.6575	FALSE	FALSE	FALSE
NM_173793.2	UPF0545 protein C22orf39	C22orf39	FALSE	FALSE	6.08956	30.5614	9.93591	9.08997	4.40711	0.283519	0.999999	0.00370753	5.01866	1.63163	1.49271	0.723716	3.07586	FALSE	FALSE	FALSE
NM_172213.1	CD8b molecule (CD8B), transcript variant 2	CD8B	FALSE	FALSE	10.8594	54.4983	23.5763	16.2096	10.4573	0.331019	0.999999	0.160331	5.01853	2.17104	1.49267	0.962974	2.31157	FALSE	FALSE	FALSE
BC053859.1	Apolipoprotein B mRNA editing enzyme, catalytic polypeptide-like 3B, mRNA (cDNA clone MGC:61606 IMAGE:6174285), complete cds	APOBEC3B	FALSE	FALSE	4.75922	23.8788	12.9791	7.10234	5.75694	0.0163132	0.999999	0.00278095	5.01738	2.72716	1.49233	1.20964	1.83978	FALSE	FALSE	FALSE
[truncated: 7,046 more rows]
